# Supplementary material for: Analysis of Theileria orientalis draft genome sequences reveals potential species-level divergence of the Ikeda, Chitose and Buffeli genotypes
Source: PubMed Central journal article supplement (PMC5921998; doi:10.1186/s12864-018-4701-2), 2018-04-27
Supplement: 12864_2018_4701_MOESM5_ESM.pdf [file 12864_2018_4701_MOESM5_ESM.pdf]

| protein_id     | function                       | number_of_SNPs |
|----------------|--------------------------------|----------------|
| XP_009690723.1 | conserved hypothetical protein | 579            |
| XP_009691742.1 | uncharacterized protein        | 439            |
| XP_009690688.1 | conserved hypothetical protein | 312            |
| XP_009690725.1 | conserved hypothetical protein | 298            |
| XP_009689372.1 | conserved hypothetical protein | 252            |
| XP_009690985.1 | 5'-3' exonuclease              | 214            |
| XP_009689354.1 | uncharacterized protein        | 194            |
| XP_009691801.1 | hypothetical protein           | 181            |
| XP_009690882.1 | uncharacterized protein        | 173            |
| XP_009691853.1 | hypothetical protein           | 157            |
| XP_009691126.1 | conserved hypothetical protein | 151            |
| XP_009689498.1 | hypothetical protein           | 141            |
| XP_009692724.1 | hypothetical protein           | 137            |
| XP_009691870.1 | conserved hypothetical protein | 133            |
| XP_009690948.1 | conserved hypothetical protein | 129            |
| XP_009690864.1 | uncharacterized protein        | 125            |
| XP_009691879.1 | conserved hypothetical protein | 122            |
| XP_009689418.1 | conserved hypothetical protein | 113            |
| XP_009692745.1 | uncharacterized protein        | 110            |
| XP_009692680.1 | conserved hypothetical protein | 110            |
| XP_009689411.1 | hypothetical protein           | 107            |
| XP_009692729.1 | conserved hypothetical protein | 107            |
| XP_009689503.1 | hypothetical protein           | 103            |
| XP_009689500.1 | conserved hypothetical protein | 102            |
| XP_009690903.1 | uncharacterized protein        | 100            |
| XP_009690788.1 | conserved hypothetical protein | 99             |
| XP_009690848.1 | uncharacterized protein        | 98             |
| XP_009689605.1 | conserved hypothetical protein | 93             |
| XP_009689292.1 | uncharacterized protein        | 89             |
| XP_009690029.1 | conserved hypothetical protein | 81             |
| XP_009691790.1 | hypothetical protein           | 81             |
| XP_009691758.1 | conserved hypothetical protein | 80             |
| XP_009691791.1 | conserved hypothetical protein | 79             |
| XP_009690634.1 | conserved hypothetical protein | 72             |
| XP_009689494.1 | conserved hypothetical protein | 72             |
| XP_009690983.1 | uncharacterized protein        | 70             |
| XP_009690252.1 | conserved hypothetical protein | 68             |
| XP_009692748.1 | conserved hypothetical protein | 67             |

|                |                                               |    |
|----------------|-----------------------------------------------|----|
| XP_009689502.1 | hypothetical protein                          | 66 |
| XP_009690987.1 | conserved hypothetical protein                | 66 |
| XP_009690901.1 | uncharacterized protein                       | 66 |
| XP_009689298.1 | conserved hypothetical protein                | 65 |
| XP_009690807.1 | hypothetical protein                          | 63 |
| XP_009689321.1 | conserved hypothetical protein                | 63 |
| XP_009689504.1 | hypothetical protein                          | 62 |
| XP_009691667.1 | hypothetical protein                          | 62 |
| XP_009692733.1 | uncharacterized protein                       | 62 |
| XP_009689501.1 | conserved hypothetical protein                | 61 |
| XP_009692730.1 | uncharacterized protein                       | 61 |
| XP_009692744.1 | uncharacterized protein                       | 59 |
| XP_009690105.1 | uncharacterized protein                       | 59 |
| XP_009690969.1 | conserved hypothetical protein                | 57 |
| XP_009692646.1 | Conserved hypothetical protein                | 56 |
| XP_009691922.1 | conserved hypothetical protein                | 56 |
| XP_009689382.1 | uncharacterized protein                       | 55 |
| XP_009691106.1 | conserved hypothetical protein                | 52 |
| XP_009692731.1 | conserved hypothetical protein                | 48 |
| XP_009690973.1 | conserved hypothetical protein                | 47 |
| XP_009689457.1 | conserved hypothetical protein                | 46 |
| XP_009689735.1 | conserved hypothetical protein                | 44 |
| XP_009690106.1 | hypothetical protein                          | 44 |
| XP_009690635.1 | conserved hypothetical protein                | 43 |
| XP_009689373.1 | uncharacterized protein                       | 43 |
| XP_009692796.1 | uncharacterized protein                       | 42 |
| XP_009691212.1 | conserved hypothetical protein                | 42 |
| XP_009692822.1 | cell division control protein                 | 42 |
| XP_009692622.1 | uncharacterized protein                       | 40 |
| XP_009691770.1 | conserved hypothetical protein                | 40 |
| XP_009692529.1 | conserved hypothetical protein                | 39 |
| XP_009691663.1 | conserved hypothetical protein                | 39 |
| XP_009691885.1 | uncharacterized protein                       | 39 |
| XP_009689606.1 | ubiquitination-mediated degradation component | 38 |
| XP_009691032.1 | conserved hypothetical protein                | 35 |
| XP_009691014.1 | uncharacterized protein                       | 34 |
| XP_009691940.1 | uncharacterized protein                       | 34 |
| XP_009688926.1 | fructose-bisphosphate aldolase 2              | 34 |
| XP_009691769.1 | uncharacterized protein                       | 33 |

|                |                                                      |    |
|----------------|------------------------------------------------------|----|
| XP_009690008.1 | conserved hypothetical protein                       | 32 |
| XP_009688956.1 | ATP-dependent RNA helicase                           | 31 |
| XP_009691762.1 | conserved hypothetical protein                       | 31 |
| XP_009690700.1 | ABC transporter                                      | 31 |
| XP_009690337.1 | glutaminyl-tRNA synthetase                           | 30 |
| XP_009691047.1 | conserved hypothetical protein                       | 29 |
| XP_009691277.1 | uncharacterized protein                              | 29 |
| XP_009689955.1 | conserved hypothetical protein                       | 28 |
| XP_009691016.1 | uncharacterized protein                              | 28 |
| XP_009690964.1 | conserved hypothetical protein                       | 28 |
| XP_009688836.1 | uncharacterized protein                              | 28 |
| XP_009689410.1 | conserved hypothetical protein                       | 28 |
| XP_009691866.1 | conserved hypothetical protein                       | 27 |
| XP_009690113.1 | uncharacterized protein                              | 27 |
| XP_009692741.1 | DEAD-box family helicase                             | 27 |
| XP_009692204.1 | DNA-directed RNA polymerase III largest subunit RPC1 | 27 |
| XP_009692735.1 | hypothetical protein                                 | 27 |
| XP_009689584.1 | uncharacterized protein                              | 26 |
| XP_009691242.1 | conserved hypothetical protein                       | 26 |
| XP_009692726.1 | uncharacterized protein                              | 26 |
| XP_009691802.1 | uncharacterized protein                              | 26 |
| XP_009692823.1 | conserved hypothetical protein                       | 26 |
| XP_009692043.1 | predicted protein                                    | 25 |
| XP_009689764.1 | conserved hypothetical protein                       | 25 |
| XP_009692649.1 | conserved hypothetical protein                       | 25 |
| XP_009690114.1 | uncharacterized protein                              | 25 |
| XP_009692698.1 | serine/threonine kinase                              | 24 |
| XP_009691937.1 | uncharacterized protein                              | 24 |
| XP_009690690.1 | transducin-like G-protein beta                       | 24 |
| XP_009689563.1 | uncharacterized protein                              | 24 |
| XP_009690898.1 | conserved hypothetical protein                       | 24 |
| XP_009691257.1 | mRNA transport factor                                | 24 |
| XP_009690689.1 | cleavage stimulation factor subunit 1                | 23 |
| XP_009688835.1 | conserved hypothetical protein                       | 23 |
| XP_009690391.1 | conserved hypothetical protein                       | 23 |
| XP_009689565.1 | chromatin assembly factor subunit                    | 23 |
| XP_009688851.1 | cysteine desulfurase                                 | 23 |
| XP_009690808.1 | conserved hypothetical protein                       | 23 |
| XP_009690494.1 | DNA topoisomerase 2                                  | 23 |

|                |                                                         |    |
|----------------|---------------------------------------------------------|----|
| XP_009689262.1 | uncharacterized protein                                 | 23 |
| XP_009690034.1 | uncharacterized protein                                 | 23 |
| XP_009691031.1 | ABC transporter                                         | 23 |
| XP_009692769.1 | uncharacterized protein                                 | 23 |
| XP_009690766.1 | uncharacterized protein                                 | 22 |
| XP_009690995.1 | uncharacterized protein                                 | 22 |
| XP_009692743.1 | conserved hypothetical protein                          | 22 |
| XP_009691052.1 | conserved hypothetical protein                          | 22 |
| XP_009690971.1 | conserved hypothetical protein                          | 22 |
| XP_009691840.1 | hexose transporter                                      | 22 |
| XP_009692826.1 | uncharacterized protein                                 | 22 |
| XP_009692358.1 | uncharacterized protein                                 | 22 |
| XP_009689202.1 | uncharacterized protein                                 | 21 |
| XP_009689133.1 | predicted protein                                       | 21 |
| XP_009691771.1 | uncharacterized protein                                 | 21 |
| XP_009692675.1 | uncharacterized protein                                 | 21 |
| XP_009691050.1 | uncharacterized protein                                 | 21 |
| XP_009690867.1 | uncharacterized protein                                 | 21 |
| XP_009690623.1 | conserved hypothetical protein                          | 21 |
| XP_009691051.1 | uncharacterized protein                                 | 21 |
| XP_009689415.1 | uncharacterized protein                                 | 20 |
| XP_009690025.1 | conserved hypothetical protein                          | 20 |
| XP_009690107.1 | hypothetical protein                                    | 20 |
| XP_009690855.1 | conserved hypothetical protein                          | 20 |
| XP_009689244.1 | uncharacterized protein                                 | 20 |
| XP_009692674.1 | uncharacterized protein                                 | 20 |
| XP_009690023.1 | ABC transporter                                         | 20 |
| XP_009691936.1 | hypothetical protein                                    | 20 |
| XP_009692028.1 | asparagine-rich protein                                 | 20 |
| XP_009691422.1 | conserved hypothetical protein                          | 19 |
| XP_009690697.1 | 1-hydroxy-2-methyl-2-(e)-butenyl 4-diphosphate synthase | 19 |
| XP_009691649.1 | uncharacterized protein                                 | 19 |
| XP_009691392.1 | uncharacterized protein                                 | 19 |
| XP_009691054.1 | conserved hypothetical protein                          | 18 |
| XP_009691693.1 | uncharacterized protein                                 | 18 |
| XP_009691597.1 | conserved hypothetical protein                          | 18 |
| XP_009690981.1 | conserved hypothetical protein                          | 18 |
| XP_009691697.1 | ATP-dependent RNA helicase                              | 18 |
| XP_009688917.1 | uncharacterized protein                                 | 18 |

|                |                                               |    |
|----------------|-----------------------------------------------|----|
| XP_009690066.1 | uncharacterized protein                       | 18 |
| XP_009692787.1 | uncharacterized protein                       | 18 |
| XP_009692276.1 | uncharacterized protein                       | 18 |
| XP_009688887.1 | uncharacterized protein                       | 18 |
| XP_009689355.1 | uncharacterized protein                       | 18 |
| XP_009691442.1 | uncharacterized protein                       | 18 |
| XP_009691821.1 | conserved hypothetical protein                | 18 |
| XP_009689585.1 | uncharacterized protein                       | 18 |
| XP_009690929.1 | conserved hypothetical protein                | 18 |
| XP_009690947.1 | conserved hypothetical protein                | 18 |
| XP_009689297.1 | conserved hypothetical protein                | 18 |
| XP_009689462.1 | flavin-containing amine oxidase               | 17 |
| XP_009690285.1 | conserved hypothetical protein                | 17 |
| XP_009689785.1 | uncharacterized protein                       | 17 |
| XP_009692746.1 | uncharacterized protein                       | 17 |
| XP_009689492.1 | coatamer subunit beta                         | 17 |
| XP_009689277.1 | predicted protein                             | 17 |
| XP_009690863.1 | pentatricopeptide repeat containing protein   | 17 |
| XP_009689318.1 | silent information regulator protein Sir2     | 17 |
| XP_009690831.1 | conserved hypothetical protein                | 16 |
| XP_009689957.1 | transcription or splicing factor-like protein | 16 |
| XP_009688837.1 | conserved hypothetical protein                | 16 |
| XP_009692732.1 | hypothetical protein                          | 16 |
| XP_009691258.1 | conserved hypothetical protein                | 16 |
| XP_009691521.1 | conserved hypothetical protein                | 16 |
| XP_009690884.1 | uncharacterized protein                       | 16 |
| XP_009690965.1 | conserved hypothetical protein                | 16 |
| XP_009691485.1 | conserved hypothetical protein                | 16 |
| XP_009691868.1 | hypothetical protein                          | 16 |
| XP_009691048.1 | conserved hypothetical protein                | 16 |
| XP_009691316.1 | molecular chaperone DnaJ                      | 15 |
| XP_009690341.1 | uncharacterized protein                       | 15 |
| XP_009690534.1 | conserved hypothetical protein                | 15 |
| XP_009692645.1 | conserved hypothetical protein                | 15 |
| XP_009692324.1 | uncharacterized protein                       | 15 |
| XP_009692263.1 | uncharacterized protein                       | 15 |
| XP_009691842.1 | uncharacterized protein                       | 15 |
| XP_009691592.1 | Prp8 protein                                  | 15 |
| XP_009690656.1 | conserved hypothetical protein                | 15 |

|                |                                       |    |
|----------------|---------------------------------------|----|
| XP_009691764.1 | uncharacterized protein               | 15 |
| XP_009692489.1 | exoribonuclease                       | 15 |
| XP_009691914.1 | conserved hypothetical protein        | 14 |
| XP_009692479.1 | conserved hypothetical protein        | 14 |
| XP_009692725.1 | conserved hypothetical protein        | 14 |
| XP_009692139.1 | conserved hypothetical protein        | 14 |
| XP_009689506.1 | 50S ribosomal protein L17             | 14 |
| XP_009691246.1 | conserved hypothetical protein        | 14 |
| XP_009689278.1 | conserved hypothetical protein        | 14 |
| XP_009691520.1 | uncharacterized protein               | 14 |
| XP_009691907.1 | uncharacterized protein               | 14 |
| XP_009692195.1 | conserved hypothetical protein        | 14 |
| XP_009692810.1 | uncharacterized protein               | 14 |
| XP_009691746.1 | conserved hypothetical protein        | 14 |
| XP_009689258.1 | conserved hypothetical protein        | 14 |
| XP_009692290.1 | uncharacterized protein               | 14 |
| XP_009691917.1 | conserved hypothetical protein        | 14 |
| XP_009692112.1 | uncharacterized protein               | 14 |
| XP_009691844.1 | predicted protein                     | 14 |
| XP_009692137.1 | conserved hypothetical protein        | 14 |
| XP_009691055.1 | uncharacterized protein               | 14 |
| XP_009691878.1 | conserved hypothetical protein        | 14 |
| XP_009689774.1 | DNA-directed RNA polymerase precursor | 14 |
| XP_009689105.1 | 60S acidic ribosomal protein P0       | 13 |
| XP_009690869.1 | uncharacterized protein               | 13 |
| XP_009689361.1 | uncharacterized protein               | 13 |
| XP_009689443.1 | uncharacterized protein               | 13 |
| XP_009691867.1 | hypothetical protein                  | 13 |
| XP_009690953.1 | guanylyl cyclase                      | 13 |
| XP_009690990.1 | uncharacterized protein               | 13 |
| XP_009690787.1 | hypothetical protein                  | 13 |
| XP_009692547.1 | uncharacterized protein               | 13 |
| XP_009689047.1 | conserved hypothetical protein        | 13 |
| XP_009690571.1 | NADH-cytochrome b5 reductase          | 13 |
| XP_009689145.1 | conserved hypothetical protein        | 13 |
| XP_009690610.1 | conserved hypothetical protein        | 13 |
| XP_009691708.1 | conserved hypothetical protein        | 13 |
| XP_009689607.1 | DNA-directed RNA polymerase           | 13 |
| XP_009692382.1 | uncharacterized protein               | 13 |

|                |                                |    |
|----------------|--------------------------------|----|
| XP_009692656.1 | conserved hypothetical protein | 13 |
| XP_009692191.1 | DEAD-box family helicase       | 13 |
| XP_009691026.1 | conserved hypothetical protein | 13 |
| XP_009688963.1 | conserved hypothetical protein | 12 |
| XP_009691942.1 | uncharacterized protein        | 12 |
| XP_009692521.1 | conserved hypothetical protein | 12 |
| XP_009689507.1 | predicted protein              | 12 |
| XP_009691818.1 | uncharacterized protein        | 12 |
| XP_009689495.1 | conserved hypothetical protein | 12 |
| XP_009689328.1 | conserved hypothetical protein | 12 |
| XP_009691645.1 | uncharacterized protein        | 12 |
| XP_009691587.1 | conserved hypothetical protein | 12 |
| XP_009692491.1 | condensin subunit              | 12 |
| XP_009688838.1 | uncharacterized protein        | 12 |
| XP_009692653.1 | Ran binding protein 1          | 12 |
| XP_009689856.1 | conserved hypothetical protein | 12 |
| XP_009692475.1 | conserved hypothetical protein | 12 |
| XP_009690032.1 | uncharacterized protein        | 12 |
| XP_009691795.1 | uncharacterized protein        | 12 |
| XP_009691588.1 | uncharacterized protein        | 12 |
| XP_009689294.1 | conserved hypothetical protein | 12 |
| XP_009691676.1 | splicing factor subunit        | 12 |
| XP_009690828.1 | uncharacterized protein        | 12 |
| XP_009692258.1 | conserved hypothetical protein | 11 |
| XP_009692678.1 | conserved hypothetical protein | 11 |
| XP_009691056.1 | uncharacterized protein        | 11 |
| XP_009690625.1 | conserved hypothetical protein | 11 |
| XP_009689549.1 | heat-shock protein             | 11 |
| XP_009690299.1 | RNA helicase                   | 11 |
| XP_009689312.1 | conserved hypothetical protein | 11 |
| XP_009691849.1 | conserved hypothetical protein | 11 |
| XP_009690297.1 | conserved hypothetical protein | 11 |
| XP_009691888.1 | conserved hypothetical protein | 11 |
| XP_009692454.1 | conserved hypothetical protein | 11 |
| XP_009691665.1 | hypothetical protein           | 11 |
| XP_009690464.1 | predicted protein              | 11 |
| XP_009691785.1 | hypothetical protein           | 11 |
| XP_009691803.1 | uncharacterized protein        | 11 |
| XP_009689270.1 | uncharacterized protein        | 11 |

|                |                                                      |    |
|----------------|------------------------------------------------------|----|
| XP_009691203.1 | hypothetical protein                                 | 11 |
| XP_009690934.1 | conserved hypothetical protein                       | 11 |
| XP_009691053.1 | uncharacterized protein                              | 11 |
| XP_009691683.1 | uncharacterized protein                              | 11 |
| XP_009690693.1 | serine/threonine protein kinase                      | 11 |
| XP_009690902.1 | uncharacterized protein                              | 11 |
| XP_009689493.1 | hypothetical protein                                 | 11 |
| XP_009689076.1 | uncharacterized protein                              | 11 |
| XP_009690650.1 | thrombospondin%2C type I repeat containing protein   | 11 |
| XP_009692790.1 | conserved hypothetical protein                       | 11 |
| XP_009692035.1 | DNA polymerase epsilon catalytic subunit             | 10 |
| XP_009689952.1 | uncharacterized protein                              | 10 |
| XP_009689381.1 | uncharacterized protein                              | 10 |
| XP_009691852.1 | conserved hypothetical protein                       | 10 |
| XP_009689393.1 | DEAD-box helicase                                    | 10 |
| XP_009691151.1 | conserved hypothetical protein                       | 10 |
| XP_009689709.1 | uncharacterized protein                              | 10 |
| XP_009689526.1 | elongation factor 1-alpha                            | 10 |
| XP_009691916.1 | uncharacterized protein                              | 10 |
| XP_009691857.1 | carbamoyl phosphate synthase II                      | 10 |
| XP_009690890.1 | conserved hypothetical protein                       | 10 |
| XP_009691908.1 | uncharacterized protein                              | 10 |
| XP_009690972.1 | conserved hypothetical protein                       | 10 |
| XP_009692017.1 | conserved hypothetical protein                       | 10 |
| XP_009691159.1 | U5 small nuclear ribonucleoprotein-specific helicase | 10 |
| XP_009690860.1 | eukaryotic peptide chain release factor              | 10 |
| XP_009691243.1 | DEAD/DEAH-like helicase                              | 10 |
| XP_009689324.1 | long-chain-fatty-acid--CoA ligase 5                  | 10 |
| XP_009689940.1 | uncharacterized protein                              | 10 |
| XP_009691232.1 | conserved hypothetical protein                       | 10 |
| XP_009691074.1 | conserved hypothetical protein                       | 10 |
| XP_009692750.1 | uncharacterized protein                              | 10 |
| XP_009689537.1 | conserved hypothetical protein                       | 10 |
| XP_009691679.1 | conserved hypothetical protein                       | 10 |
| XP_009692345.1 | uncharacterized protein                              | 10 |
| XP_009692722.1 | uncharacterized protein                              | 10 |
| XP_009690538.1 | chromatin-binding protein                            | 10 |
| XP_009692483.1 | Ran-binding protein                                  | 10 |
| XP_009689480.1 | uncharacterized protein                              | 10 |



|                |                                                   |    |
|----------------|---------------------------------------------------|----|
| XP_009692589.1 | uncharacterized protein                           | 10 |
| XP_009690026.1 | hypothetical protein                              | 10 |
| XP_009691692.1 | DNA-directed RNA polymerase D subunit             | 10 |
| XP_009691441.1 | homeodomain-like containing protein               | 10 |
| XP_009690957.1 | predicted protein                                 | 10 |
| XP_009690477.1 | conserved hypothetical protein                    | 9  |
| XP_009689922.1 | DEAD-box family helicase                          | 9  |
| XP_009691122.1 | uncharacterized protein                           | 9  |
| XP_009689370.1 | conserved hypothetical protein                    | 9  |
| XP_009692761.1 | conserved hypothetical protein                    | 9  |
| XP_009690355.1 | uncharacterized protein                           | 9  |
| XP_009689066.1 | ABC transporter                                   | 9  |
| XP_009692523.1 | conserved hypothetical protein                    | 9  |
| XP_009691393.1 | hypothetical protein                              | 9  |
| XP_009691698.1 | translation initiation factor                     | 9  |
| XP_009691743.1 | conserved hypothetical protein                    | 9  |
| XP_009690128.1 | replication licensing factor                      | 9  |
| XP_009692092.1 | conserved hypothetical protein                    | 9  |
| XP_009690551.1 | uncharacterized protein                           | 9  |
| XP_009689483.1 | DEAD-box family helicase                          | 9  |
| XP_009691839.1 | conserved hypothetical protein                    | 9  |
| XP_009690450.1 | conserved hypothetical protein                    | 9  |
| XP_009689305.1 | uncharacterized protein                           | 9  |
| XP_009690011.1 | uncharacterized protein                           | 9  |
| XP_009690352.1 | conserved hypothetical protein                    | 9  |
| XP_009691254.1 | regulator of nonsense transcripts-related protein | 9  |
| XP_009689465.1 | cation ATPase                                     | 9  |
| XP_009689505.1 | cytochrome c oxidase subunit 2                    | 9  |
| XP_009690245.1 | uncharacterized protein                           | 9  |
| XP_009689970.1 | uncharacterized protein                           | 9  |
| XP_009690090.1 | conserved hypothetical protein                    | 9  |
| XP_009689750.1 | threonyl-tRNA synthetase                          | 9  |
| XP_009689445.1 | conserved hypothetical protein                    | 9  |
| XP_009689730.1 | conserved hypothetical protein                    | 9  |
| XP_009691367.1 | chromosome condensation protein                   | 9  |
| XP_009690811.1 | conserved hypothetical protein                    | 9  |
| XP_009690938.1 | uncharacterized protein                           | 9  |
| XP_009689829.1 | conserved hypothetical protein                    | 9  |
| XP_009692164.1 | uncharacterized protein                           | 9  |

|                |                                                      |   |
|----------------|------------------------------------------------------|---|
| XP_009691819.1 | conserved hypothetical protein                       | 8 |
| XP_009690936.1 | conserved hypothetical protein                       | 8 |
| XP_009689251.1 | conserved hypothetical protein                       | 8 |
| XP_009691171.1 | uncharacterized protein                              | 8 |
| XP_009692501.1 | uncharacterized protein                              | 8 |
| XP_009691823.1 | conserved hypothetical protein                       | 8 |
| XP_009689201.1 | HEAT repeat containing protein                       | 8 |
| XP_009691621.1 | conserved hypothetical protein                       | 8 |
| XP_009690036.1 | conserved hypothetical protein                       | 8 |
| XP_009692597.1 | conserved hypothetical protein                       | 8 |
| XP_009692306.1 | importin-alpha                                       | 8 |
| XP_009691773.1 | conserved hypothetical protein                       | 8 |
| XP_009689061.1 | uncharacterized protein                              | 8 |
| XP_009689190.1 | aminopeptidase N                                     | 8 |
| XP_009690797.1 | uncharacterized protein                              | 8 |
| XP_009689752.1 | uncharacterized protein                              | 8 |
| XP_009690195.1 | uncharacterized protein                              | 8 |
| XP_009690439.1 | uncharacterized protein                              | 8 |
| XP_009690548.1 | conserved hypothetical protein                       | 8 |
| XP_009690104.1 | transcription factor                                 | 8 |
| XP_009691101.1 | uncharacterized protein                              | 8 |
| XP_009690701.1 | uncharacterized protein                              | 8 |
| XP_009690443.1 | uncharacterized protein                              | 8 |
| XP_009691038.1 | hypothetical protein                                 | 8 |
| XP_009692108.1 | eukaryotic translation initiation factor 3 subunit 8 | 8 |
| XP_009690866.1 | conserved hypothetical protein                       | 8 |
| XP_009690366.1 | conserved hypothetical protein                       | 8 |
| XP_009692639.1 | uncharacterized protein                              | 8 |
| XP_009690028.1 | hypothetical protein                                 | 8 |
| XP_009691792.1 | uncharacterized protein                              | 8 |
| XP_009690336.1 | conserved hypothetical protein                       | 8 |
| XP_009691526.1 | conserved hypothetical protein                       | 8 |
| XP_009691395.1 | nucleolar protein                                    | 8 |
| XP_009691410.1 | P-type ATPase 2                                      | 8 |
| XP_009691385.1 | conserved hypothetical protein                       | 8 |
| XP_009692497.1 | uncharacterized protein                              | 8 |
| XP_009691397.1 | uncharacterized protein                              | 8 |
| XP_009690531.1 | uncharacterized protein                              | 8 |
| XP_009690127.1 | conserved hypothetical protein                       | 8 |

|                |                                                  |   |
|----------------|--------------------------------------------------|---|
| XP_009691087.1 | integral membrane protein                        | 8 |
| XP_009692277.1 | hypothetical protein                             | 8 |
| XP_009688906.1 | uncharacterized protein                          | 8 |
| XP_009692121.1 | sodium transporter                               | 8 |
| XP_009691572.1 | uncharacterized protein                          | 8 |
| XP_009690051.1 | conserved hypothetical protein                   | 8 |
| XP_009690380.1 | uncharacterized protein                          | 8 |
| XP_009691848.1 | conserved hypothetical protein                   | 8 |
| XP_009689660.1 | conserved hypothetical protein                   | 8 |
| XP_009692734.1 | hypothetical protein                             | 8 |
| XP_009691411.1 | DEAD-box family RNA helicase                     | 8 |
| XP_009689256.1 | uncharacterized protein                          | 8 |
| XP_009691854.1 | hypothetical protein                             | 8 |
| XP_009691213.1 | 40S ribosomal protein S3a                        | 8 |
| XP_009692116.1 | vacuolar H+ATPase subunit                        | 7 |
| XP_009692321.1 | conserved hypothetical protein                   | 7 |
| XP_009689765.1 | 7%2C8 dihydro-8-oxoguanine DNA glycosylase       | 7 |
| XP_009688937.1 | uncharacterized protein                          | 7 |
| XP_009690539.1 | uncharacterized protein                          | 7 |
| XP_009689280.1 | conserved hypothetical protein                   | 7 |
| XP_009689939.1 | uncharacterized protein                          | 7 |
| XP_009692487.1 | tyrosyl-tRNA synthetase                          | 7 |
| XP_009691670.1 | conserved hypothetical protein                   | 7 |
| XP_009692074.1 | conserved hypothetical protein                   | 7 |
| XP_009691571.1 | conserved hypothetical protein                   | 7 |
| XP_009692785.1 | hypothetical protein                             | 7 |
| XP_009690083.1 | 1-deoxy-D-xylulose 5-phosphate reducto-isomerase | 7 |
| XP_009689746.1 | conserved hypothetical protein                   | 7 |
| XP_009690108.1 | predicted protein                                | 7 |
| XP_009691089.1 | conserved hypothetical protein                   | 7 |
| XP_009692457.1 | uncharacterized protein                          | 7 |
| XP_009691174.1 | uncharacterized protein                          | 7 |
| XP_009689388.1 | conserved hypothetical protein                   | 7 |
| XP_009692736.1 | tubulin subunit alpha                            | 7 |
| XP_009691881.1 | conserved hypothetical protein                   | 7 |
| XP_009691564.1 | conserved hypothetical protein                   | 7 |
| XP_009689210.1 | conserved hypothetical protein                   | 7 |
| XP_009689837.1 | patatin-family phospholipase                     | 7 |
| XP_009691202.1 | conserved hypothetical protein                   | 7 |

|                |                                        |   |
|----------------|----------------------------------------|---|
| XP_009691691.1 | phospholipase                          | 7 |
| XP_009690974.1 | uncharacterized protein                | 7 |
| XP_009692476.1 | conserved hypothetical protein         | 7 |
| XP_009691509.1 | conserved hypothetical protein         | 7 |
| XP_009690049.1 | conserved hypothetical protein         | 7 |
| XP_009691334.1 | uncharacterized protein                | 7 |
| XP_009691569.1 | uncharacterized protein                | 7 |
| XP_009691983.1 | likely GTP/GDP exchange factor for ARF | 7 |
| XP_009690101.1 | uncharacterized protein                | 7 |
| XP_009689799.1 | alanyl-tRNA synthetase                 | 7 |
| XP_009689338.1 | conserved hypothetical protein         | 7 |
| XP_009689540.1 | uncharacterized protein                | 7 |
| XP_009692459.1 | MAC/perforin                           | 7 |
| XP_009689095.1 | importin beta                          | 7 |
| XP_009692148.1 | conserved hypothetical protein         | 7 |
| XP_009692516.1 | transcription modulator                | 7 |
| XP_009689548.1 | histone acetyltransferase              | 7 |
| XP_009691248.1 | conserved hypothetical protein         | 7 |
| XP_009691015.1 | conserved hypothetical protein         | 7 |
| XP_009690454.1 | conserved hypothetical protein         | 7 |
| XP_009690544.1 | uncharacterized protein                | 7 |
| XP_009689475.1 | uncharacterized protein                | 7 |
| XP_009688840.1 | ABC transporter                        | 7 |
| XP_009691880.1 | conserved hypothetical protein         | 7 |
| XP_009689159.1 | uncharacterized protein                | 7 |
| XP_009691604.1 | hypothetical protein                   | 7 |
| XP_009690740.1 | ubiquitin-activating enzyme E1         | 7 |
| XP_009689822.1 | uncharacterized protein                | 6 |
| XP_009692686.1 | conserved hypothetical protein         | 6 |
| XP_009689658.1 | uncharacterized protein                | 6 |
| XP_009691341.1 | uncharacterized protein                | 6 |
| XP_009689046.1 | E3 ubiquitin-protein ligase HUWE1      | 6 |
| XP_009691359.1 | conserved hypothetical protein         | 6 |
| XP_009690238.1 | conserved hypothetical protein         | 6 |
| XP_009689131.1 | conserved hypothetical protein         | 6 |
| XP_009690926.1 | conserved hypothetical protein         | 6 |
| XP_009692768.1 | uncharacterized protein                | 6 |
| XP_009692153.1 | Pbj2                                   | 6 |
| XP_009691637.1 | conserved hypothetical protein         | 6 |

|                 |                                                     |   |
|-----------------|-----------------------------------------------------|---|
| XP_009690563.1  | 5'-3' exonuclease                                   | 6 |
| XP_0096889646.1 | conserved hypothetical protein                      | 6 |
| XP_009692477.1  | predicted protein                                   | 6 |
| XP_009690198.1  | conserved hypothetical protein                      | 6 |
| XP_009691864.1  | uncharacterized protein                             | 6 |
| XP_009691593.1  | conserved hypothetical protein                      | 6 |
| XP_009692553.1  | uncharacterized protein                             | 6 |
| XP_009689449.1  | conserved hypothetical protein                      | 6 |
| XP_009691057.1  | conserved hypothetical protein                      | 6 |
| XP_009691776.1  | conserved hypothetical protein                      | 6 |
| XP_009688978.1  | membrane occupation and recognition nexus protein 1 | 6 |
| XP_009690360.1  | uncharacterized protein                             | 6 |
| XP_009692107.1  | valyl-tRNA synthetase                               | 6 |
| XP_009692705.1  | structure-specific recognition protein 1            | 6 |
| XP_009690086.1  | homeodomain-like containing protein                 | 6 |
| XP_009692710.1  | conserved hypothetical protein                      | 6 |
| XP_009692052.1  | uncharacterized protein                             | 6 |
| XP_009691423.1  | uncharacterized protein                             | 6 |
| XP_009690213.1  | 1-phosphatidylinositol-4-phosphate 5-kinase         | 6 |
| XP_009691824.1  | uncharacterized protein                             | 6 |
| XP_009689073.1  | peptidyl-prolyl cis-trans isomerase                 | 6 |
| XP_009689219.1  | conserved hypothetical protein                      | 6 |
| XP_009692146.1  | uncharacterized protein                             | 6 |
| XP_009689496.1  | ribosomal protein L15                               | 6 |
| XP_009688869.1  | hexokinase 1                                        | 6 |
| XP_009688985.1  | conserved hypothetical protein                      | 6 |
| XP_009689089.1  | conserved hypothetical protein                      | 6 |
| XP_009692259.1  | uncharacterized protein                             | 6 |
| XP_009692467.1  | uncharacterized protein                             | 6 |
| XP_009692158.1  | uncharacterized protein                             | 6 |
| XP_009692621.1  | gamma adaptin                                       | 6 |
| XP_009689616.1  | phosphatidylinositol 4-kinase                       | 6 |
| XP_009688892.1  | protein phosphatase 2c                              | 6 |
| XP_009689588.1  | conserved hypothetical protein                      | 6 |
| XP_009690292.1  | conserved hypothetical protein                      | 6 |
| XP_009690975.1  | FKBP-type peptidyl-prolyl cis-trans isomerase       | 6 |
| XP_009691298.1  | ATP synthase subunit alpha                          | 6 |
| XP_009691863.1  | conserved hypothetical protein                      | 6 |
| XP_009692351.1  | conserved hypothetical protein                      | 6 |

|                |                                    |   |
|----------------|------------------------------------|---|
| XP_009692129.1 | tRNA-splicing endonuclease         | 6 |
| XP_009692485.1 | uncharacterized protein            | 6 |
| XP_009689352.1 | uncharacterized protein            | 6 |
| XP_009691820.1 | conserved hypothetical protein     | 6 |
| XP_009689491.1 | conserved hypothetical protein     | 6 |
| XP_009690680.1 | adenosylhomocysteinase             | 6 |
| XP_009690132.1 | uncharacterized protein            | 6 |
| XP_009689895.1 | conserved hypothetical protein     | 6 |
| XP_009692753.1 | conserved hypothetical protein     | 6 |
| XP_009689843.1 | conserved hypothetical protein     | 6 |
| XP_009690993.1 | hypothetical protein               | 6 |
| XP_009691648.1 | uncharacterized protein            | 6 |
| XP_009690568.1 | isoleucyl-tRNA synthetase          | 6 |
| XP_009690702.1 | uncharacterized protein            | 6 |
| XP_009692554.1 | uncharacterized protein            | 6 |
| XP_009691930.1 | conserved hypothetical protein     | 6 |
| XP_009690699.1 | uncharacterized protein            | 6 |
| XP_009692435.1 | DNA-binding chaperone              | 6 |
| XP_009689390.1 | uncharacterized protein            | 6 |
| XP_009689079.1 | conserved hypothetical protein     | 6 |
| XP_009689299.1 | uncharacterized protein            | 5 |
| XP_009692618.1 | uncharacterized protein            | 5 |
| XP_009691514.1 | ion-translocating ATPase           | 5 |
| XP_009688971.1 | mitochondrial processing peptidase | 5 |
| XP_009692014.1 | uncharacterized protein            | 5 |
| XP_009690527.1 | uncharacterized protein            | 5 |
| XP_009690885.1 | uncharacterized protein            | 5 |
| XP_009689033.1 | uncharacterized protein            | 5 |
| XP_009691946.1 | uncharacterized protein            | 5 |
| XP_009690185.1 | uncharacterized protein            | 5 |
| XP_009691754.1 | hypothetical protein               | 5 |
| XP_009692480.1 | microfibrillar-associated protein  | 5 |
| XP_009690564.1 | uncharacterized protein            | 5 |
| XP_009691574.1 | chromosome segregation protein     | 5 |
| XP_009692550.1 | uncharacterized protein            | 5 |
| XP_009690744.1 | kinesin-like protein               | 5 |
| XP_009691421.1 | uncharacterized protein            | 5 |
| XP_009689453.1 | conserved hypothetical protein     | 5 |
| XP_009689227.1 | HEAT repeat containing protein     | 5 |

|                |                                                        |   |
|----------------|--------------------------------------------------------|---|
| XP_009689510.1 | protein kinase                                         | 5 |
| XP_009689835.1 | porin                                                  | 5 |
| XP_009691718.1 | conserved hypothetical protein                         | 5 |
| XP_009691215.1 | elongation factor tu                                   | 5 |
| XP_009691977.1 | glutamate dehydrogenase                                | 5 |
| XP_009692046.1 | pentatricopeptide repeat containing protein            | 5 |
| XP_009690727.1 | uncharacterized protein                                | 5 |
| XP_009690997.1 | uncharacterized protein                                | 5 |
| XP_009692755.1 | Requim%2C req/dpf2                                     | 5 |
| XP_009690753.1 | uncharacterized protein                                | 5 |
| XP_009690976.1 | conserved hypothetical protein                         | 5 |
| XP_009689067.1 | uncharacterized protein                                | 5 |
| XP_009690887.1 | uncharacterized protein                                | 5 |
| XP_009690836.1 | conserved hypothetical protein                         | 5 |
| XP_009689524.1 | conserved hypothetical protein                         | 5 |
| XP_009689434.1 | uncharacterized protein                                | 5 |
| XP_009690056.1 | uncharacterized protein                                | 5 |
| XP_009690331.1 | helicase                                               | 5 |
| XP_009690284.1 | uncharacterized protein                                | 5 |
| XP_009691605.1 | cysteine protease precursor TacP                       | 5 |
| XP_009690077.1 | uncharacterized protein                                | 5 |
| XP_009690641.1 | conserved hypothetical protein                         | 5 |
| XP_009690377.1 | uncharacterized protein                                | 5 |
| XP_009689470.1 | conserved hypothetical protein                         | 5 |
| XP_009690657.1 | uncharacterized protein                                | 5 |
| XP_009692712.1 | uncharacterized protein                                | 5 |
| XP_009689369.1 | uncharacterized protein                                | 5 |
| XP_009692778.1 | superoxide dismutase                                   | 5 |
| XP_009691810.1 | conserved hypothetical protein                         | 5 |
| XP_009691876.1 | uncharacterized protein                                | 5 |
| XP_009689821.1 | uncharacterized protein                                | 5 |
| XP_009691045.1 | hypothetical protein                                   | 5 |
| XP_009689265.1 | conserved hypothetical protein                         | 5 |
| XP_009689098.1 | structural maintenance of chromosome protein%2C type 1 | 5 |
| XP_009690126.1 | ubiquitin carboxyl-terminal hydrolase                  | 5 |
| XP_009691550.1 | major facilitator superfamily MFS-1 protein            | 5 |
| XP_009690729.1 | protein transport protein                              | 5 |
| XP_009691973.1 | uncharacterized protein                                | 5 |
| XP_009692315.1 | uncharacterized protein                                | 5 |

|                |                                                                      |   |
|----------------|----------------------------------------------------------------------|---|
| XP_009692500.1 | replication factor C subunit                                         | 5 |
| XP_009691805.1 | 4-methyl-5(b-hydroxyethyl)-thiazol monophosphate biosynthesis enzyme | 5 |
| XP_009690191.1 | protein kinase                                                       | 5 |
| XP_009692727.1 | uncharacterized protein                                              | 5 |
| XP_009690622.1 | conserved hypothetical protein                                       | 5 |
| XP_009691808.1 | uncharacterized protein                                              | 5 |
| XP_009692772.1 | chaperonin HSP60                                                     | 5 |
| XP_009688879.1 | conserved hypothetical protein                                       | 5 |
| XP_009691263.1 | conserved hypothetical protein                                       | 5 |
| XP_009692406.1 | conserved hypothetical protein                                       | 5 |
| XP_009689320.1 | SprA protein                                                         | 5 |
| XP_009691640.1 | uncharacterized protein                                              | 5 |
| XP_009692431.1 | chromosome segregation protein                                       | 5 |
| XP_009689184.1 | uncharacterized protein                                              | 5 |
| XP_009689452.1 | ABC transporter                                                      | 5 |
| XP_009691612.1 | conserved hypothetical protein                                       | 5 |
| XP_009689531.1 | uncharacterized protein                                              | 5 |
| XP_009689242.1 | histone acetyltransferase gcn5-related                               | 5 |
| XP_009690642.1 | uncharacterized protein                                              | 5 |
| XP_009689755.1 | uncharacterized protein                                              | 5 |
| XP_009689301.1 | ABC transporter                                                      | 5 |
| XP_009692749.1 | conserved hypothetical protein                                       | 5 |
| XP_009691875.1 | U1 snRNP protein                                                     | 5 |
| XP_009690459.1 | ATP-dependent RNA helicase                                           | 5 |
| XP_009692742.1 | uncharacterized protein                                              | 5 |
| XP_009691286.1 | conserved hypothetical protein                                       | 5 |
| XP_009689090.1 | translation elongation factor G                                      | 5 |
| XP_009690231.1 | conserved hypothetical protein                                       | 5 |
| XP_009691981.1 | uncharacterized protein                                              | 5 |
| XP_009691616.1 | uncharacterized protein                                              | 5 |
| XP_009688938.1 | conserved hypothetical protein                                       | 5 |
| XP_009691836.1 | uncharacterized protein                                              | 5 |
| XP_009692347.1 | metallopeptidase                                                     | 5 |
| XP_009691784.1 | conserved hypothetical protein                                       | 5 |
| XP_009689329.1 | conserved hypothetical protein                                       | 5 |
| XP_009690883.1 | uncharacterized protein                                              | 5 |
| XP_009690980.1 | mono-oxygenase                                                       | 5 |
| XP_009691075.1 | uncharacterized protein                                              | 5 |
| XP_009689542.1 | conserved hypothetical protein                                       | 5 |



|                |                                                  |   |
|----------------|--------------------------------------------------|---|
| XP_009690722.1 | uncharacterized protein                          | 5 |
| XP_009692482.1 | uncharacterized protein                          | 5 |
| XP_009692079.1 | uncharacterized protein                          | 5 |
| XP_009691992.1 | conserved hypothetical protein                   | 4 |
| XP_009690914.1 | conserved hypothetical protein                   | 4 |
| XP_009689456.1 | conserved hypothetical protein                   | 4 |
| XP_009689804.1 | uncharacterized protein                          | 4 |
| XP_009690217.1 | transcription initiation factor TFIIb            | 4 |
| XP_009691196.1 | RabGDI protein                                   | 4 |
| XP_009689112.1 | serine/threonine protein kinase                  | 4 |
| XP_009692517.1 | conserved hypothetical protein                   | 4 |
| XP_009690843.1 | 26S proteasome non-ATPase regulatory subunit 12  | 4 |
| XP_009692426.1 | conserved hypothetical protein                   | 4 |
| XP_009689947.1 | uncharacterized protein                          | 4 |
| XP_009690294.1 | hypothetical protein                             | 4 |
| XP_009690602.1 | 60S ribosomal protein L4/L1                      | 4 |
| XP_009690616.1 | casein kinase II subunit beta                    | 4 |
| XP_009691673.1 | uncharacterized protein                          | 4 |
| XP_009689316.1 | elongation factor 2                              | 4 |
| XP_009690300.1 | uncharacterized protein                          | 4 |
| XP_009691722.1 | uncharacterized protein                          | 4 |
| XP_009691157.1 | uncharacterized protein                          | 4 |
| XP_009691293.1 | uncharacterized protein                          | 4 |
| XP_009691453.1 | conserved hypothetical protein                   | 4 |
| XP_009689072.1 | mRNA capping enzyme subunit                      | 4 |
| XP_009689554.1 | conserved hypothetical protein                   | 4 |
| XP_009690369.1 | uncharacterized protein                          | 4 |
| XP_009690553.1 | N2%2CN2-dimethylguanosine tRNA methyltransferase | 4 |
| XP_009689059.1 | uncharacterized protein                          | 4 |
| XP_009692825.1 | hypothetical protein                             | 4 |
| XP_009692262.1 | conserved hypothetical protein                   | 4 |
| XP_009691210.1 | conserved hypothetical protein                   | 4 |
| XP_009691312.1 | SOH1-like protein                                | 4 |
| XP_009691860.1 | glycogen synthase kinase                         | 4 |
| XP_009689208.1 | uncharacterized protein                          | 4 |
| XP_009691779.1 | conserved hypothetical protein                   | 4 |
| XP_009689474.1 | 26S proteasome regulatory subunit                | 4 |
| XP_009691237.1 | ubiquitin carboxyl-terminal hydrolase            | 4 |
| XP_009692562.1 | conserved hypothetical protein                   | 4 |

|                |                                                             |   |
|----------------|-------------------------------------------------------------|---|
| XP_009689245.1 | conserved hypothetical protein                              | 4 |
| XP_009689802.1 | conserved hypothetical protein                              | 4 |
| XP_009690552.1 | calcium-transporting ATPase                                 | 4 |
| XP_009690436.1 | uncharacterized protein                                     | 4 |
| XP_009690613.1 | conserved hypothetical protein                              | 4 |
| XP_009689509.1 | conserved hypothetical protein                              | 4 |
| XP_009689115.1 | conserved hypothetical protein                              | 4 |
| XP_009690647.1 | uncharacterized protein                                     | 4 |
| XP_009690624.1 | conserved hypothetical protein                              | 4 |
| XP_009690949.1 | serine/threonine protein phosphatase pp2a catalytic subunit | 4 |
| XP_009689174.1 | conserved hypothetical protein                              | 4 |
| XP_009689864.1 | queuine tRNA-ribosyltransferase                             | 4 |
| XP_009691856.1 | uncharacterized protein                                     | 4 |
| XP_009689106.1 | uncharacterized protein                                     | 4 |
| XP_009690716.1 | uncharacterized protein                                     | 4 |
| XP_009691431.1 | uncharacterized protein                                     | 4 |
| XP_009689122.1 | conserved hypothetical protein                              | 4 |
| XP_009690629.1 | conserved hypothetical protein                              | 4 |
| XP_009689715.1 | uncharacterized protein                                     | 4 |
| XP_009689518.1 | conserved hypothetical protein                              | 4 |
| XP_009691512.1 | conserved hypothetical protein                              | 4 |
| XP_009691716.1 | uncharacterized protein                                     | 4 |
| XP_009691877.1 | vacuolar ATP synthase subunit H                             | 4 |
| XP_009692310.1 | uncharacterized protein                                     | 4 |
| XP_009690924.1 | hypothetical protein                                        | 4 |
| XP_009691744.1 | alpha adaptin                                               | 4 |
| XP_009690031.1 | hypothetical protein                                        | 4 |
| XP_009688951.1 | protein disulfide isomerase precursor                       | 4 |
| XP_009689408.1 | NEDD8-activating enzyme E1 catalytic subunit                | 4 |
| XP_009692427.1 | conserved hypothetical protein                              | 4 |
| XP_009688948.1 | DNA-directed RNA polymerase subunit alpha                   | 4 |
| XP_009692609.1 | conserved hypothetical protein                              | 4 |
| XP_009691689.1 | DNA polymerase                                              | 4 |
| XP_009692409.1 | uncharacterized protein                                     | 4 |
| XP_009692559.1 | conserved hypothetical protein                              | 4 |
| XP_009691394.1 | conserved hypothetical protein                              | 4 |
| XP_009690333.1 | predicted protein                                           | 4 |
| XP_009691972.1 | uncharacterized protein                                     | 4 |
| XP_009692403.1 | uncharacterized protein                                     | 4 |

|                |                                                                        |   |
|----------------|------------------------------------------------------------------------|---|
| XP_009689663.1 | uncharacterized protein                                                | 4 |
| XP_009692717.1 | uncharacterized protein                                                | 4 |
| XP_009690211.1 | DNA topoisomerase I                                                    | 4 |
| XP_009689342.1 | uncharacterized protein                                                | 4 |
| XP_009691939.1 | hypothetical protein                                                   | 4 |
| XP_009690911.1 | cathepsin-like cysteine protease                                       | 4 |
| XP_009691786.1 | 2-oxoglutarate dehydrogenase E1 component                              | 4 |
| XP_009691681.1 | uncharacterized protein                                                | 4 |
| XP_009689077.1 | glutathione synthetase                                                 | 4 |
| XP_009691451.1 | conserved hypothetical protein                                         | 4 |
| XP_009692502.1 | glyceraldehyde-3-phosphate dehydrogenase                               | 4 |
| XP_009691747.1 | uncharacterized protein                                                | 4 |
| XP_009691855.1 | 60S ribosomal protein L24                                              | 4 |
| XP_009690536.1 | DNA helicase                                                           | 4 |
| XP_009690353.1 | conserved hypothetical protein                                         | 4 |
| XP_009689581.1 | uncharacterized protein                                                | 4 |
| XP_009691443.1 | conserved hypothetical protein                                         | 4 |
| XP_009691704.1 | DNA-directed RNA polymerase                                            | 4 |
| XP_009691653.1 | RNA 3'-terminal phosphate cyclase                                      | 4 |
| XP_009692183.1 | conserved hypothetical protein                                         | 4 |
| XP_009691209.1 | uncharacterized protein                                                | 4 |
| XP_009691013.1 | molecular chaperone protein                                            | 4 |
| XP_009691227.1 | uncharacterized protein                                                | 4 |
| XP_009690609.1 | pyrophosphate--fructose 6-phosphate 1-phosphotransferase subunit alpha | 4 |
| XP_009689036.1 | uncharacterized protein                                                | 4 |
| XP_009689078.1 | glutathione synthetase                                                 | 4 |
| XP_009691711.1 | ankyrin repeat containing protein                                      | 4 |
| XP_009689455.1 | adaptor protein                                                        | 4 |
| XP_009690970.1 | hypothetical protein                                                   | 4 |
| XP_009690827.1 | conserved hypothetical protein                                         | 4 |
| XP_009690177.1 | coatomer complex subunit alpha                                         | 4 |
| XP_009690791.1 | uncharacterized protein                                                | 4 |
| XP_009689466.1 | conserved hypothetical protein                                         | 4 |
| XP_009689116.1 | 3'-5' exoribonuclease                                                  | 4 |
| XP_009690946.1 | conserved hypothetical protein                                         | 4 |
| XP_009689950.1 | uncharacterized protein                                                | 4 |
| XP_009690620.1 | conserved hypothetical protein                                         | 4 |
| XP_009689590.1 | conserved hypothetical protein                                         | 4 |
| XP_009690881.1 | uncharacterized protein                                                | 4 |

|                |                                  |   |
|----------------|----------------------------------|---|
| XP_009691869.1 | conserved hypothetical protein   | 4 |
| XP_009689523.1 | uncharacterized protein          | 4 |
| XP_009691383.1 | conserved hypothetical protein   | 4 |
| XP_009691380.1 | DNA ligase 1 precursor           | 4 |
| XP_009692642.1 | uncharacterized protein          | 4 |
| XP_009692545.1 | uncharacterized protein          | 4 |
| XP_009689004.1 | uncharacterized protein          | 4 |
| XP_009691409.1 | clathrin heavy chain             | 4 |
| XP_009690234.1 | molecular chaperone DnaJ         | 4 |
| XP_009690317.1 | conserved hypothetical protein   | 4 |
| XP_009691800.1 | hypothetical protein             | 4 |
| XP_009692261.1 | leucyl-tRNA synthetase           | 4 |
| XP_009688972.1 | uncharacterized protein          | 4 |
| XP_009692354.1 | uncharacterized protein          | 4 |
| XP_009689826.1 | uncharacterized protein          | 4 |
| XP_009690348.1 | uncharacterized protein          | 4 |
| XP_009691581.1 | conserved hypothetical protein   | 4 |
| XP_009689775.1 | conserved hypothetical protein   | 4 |
| XP_009692064.1 | conserved hypothetical protein   | 4 |
| XP_009691529.1 | conserved hypothetical protein   | 4 |
| XP_009690891.1 | hypothetical protein             | 4 |
| XP_009692094.1 | nucleoside diphosphate hydrolase | 4 |
| XP_009691474.1 | uncharacterized protein          | 4 |
| XP_009689334.1 | uncharacterized protein          | 4 |
| XP_009690813.1 | conserved hypothetical protein   | 4 |
| XP_009691012.1 | uncharacterized protein          | 4 |
| XP_009689180.1 | DNA polymerase I                 | 4 |
| XP_009691837.1 | cysteinyl-tRNA synthetase        | 4 |
| XP_009689350.1 | conserved hypothetical protein   | 4 |
| XP_009689322.1 | uncharacterized protein          | 4 |
| XP_009691752.1 | methionyl-tRNA synthetase        | 4 |
| XP_009691898.1 | hypothetical protein             | 4 |
| XP_009689726.1 | molecular chaperone protein      | 4 |
| XP_009691496.1 | conserved hypothetical protein   | 4 |
| XP_009692178.1 | 40S ribosomal protein S4         | 4 |
| XP_009690977.1 | actin 1                          | 4 |
| XP_009692494.1 | uncharacterized protein          | 4 |
| XP_009691259.1 | conserved hypothetical protein   | 4 |
| XP_009691794.1 | uncharacterized protein          | 4 |

|                |                                                         |   |
|----------------|---------------------------------------------------------|---|
| XP_009690927.1 | hypothetical protein                                    | 4 |
| XP_009692576.1 | uncharacterized protein                                 | 4 |
| XP_009689427.1 | DEAD-box family helicase                                | 4 |
| XP_009689341.1 | ATP-dependent helicase                                  | 4 |
| XP_009690041.1 | uncharacterized protein                                 | 4 |
| XP_009692185.1 | conserved hypothetical protein                          | 4 |
| XP_009691622.1 | conserved hypothetical protein                          | 4 |
| XP_009690502.1 | diacylglycerol kinase                                   | 4 |
| XP_009690668.1 | clathrin-coat assembly protein                          | 4 |
| XP_009691772.1 | thioredoxin reductase                                   | 4 |
| XP_009691656.1 | dihydrolipoyl dehydrogenase                             | 4 |
| XP_009690212.1 | uncharacterized protein                                 | 4 |
| XP_009692387.1 | uncharacterized protein                                 | 4 |
| XP_009690345.1 | Bromodomain-containing protein 1                        | 3 |
| XP_009690637.1 | mitochondrial carrier protein                           | 3 |
| XP_009691883.1 | conserved hypothetical protein                          | 3 |
| XP_009691328.1 | conserved hypothetical protein                          | 3 |
| XP_009690372.1 | uncharacterized protein                                 | 3 |
| XP_009689818.1 | conserved hypothetical protein                          | 3 |
| XP_009692188.1 | conserved hypothetical protein                          | 3 |
| XP_009690047.1 | ubiquitin-transferase                                   | 3 |
| XP_009691757.1 | uncharacterized protein                                 | 3 |
| XP_009691602.1 | cysteine protease precursor TacP                        | 3 |
| XP_009692813.1 | phosphatidate cytidyltransferase                        | 3 |
| XP_009691282.1 | queuine tRNA-ribosyltransferase-like protein            | 3 |
| XP_009690618.1 | conserved hypothetical protein                          | 3 |
| XP_009691935.1 | conserved hypothetical protein                          | 3 |
| XP_009690769.1 | conserved hypothetical protein                          | 3 |
| XP_009691240.1 | ferredoxin reductase-like protein                       | 3 |
| XP_009691440.1 | uncharacterized protein                                 | 3 |
| XP_009691720.1 | conserved hypothetical protein                          | 3 |
| XP_009692298.1 | uncharacterized protein                                 | 3 |
| XP_009690595.1 | conserved hypothetical protein                          | 3 |
| XP_009690209.1 | 3-demethylubiquinone-9 3-methyltransferase-like protein | 3 |
| XP_009689031.1 | autoaggregation-mediating protein                       | 3 |
| XP_009692624.1 | uncharacterized protein                                 | 3 |
| XP_009691482.1 | uncharacterized protein                                 | 3 |
| XP_009689288.1 | DNA replication licensing factor Mcm2                   | 3 |
| XP_009688859.1 | conserved hypothetical protein                          | 3 |

|                |                                             |   |
|----------------|---------------------------------------------|---|
| XP_009691705.1 | uncharacterized protein                     | 3 |
| XP_009690567.1 | conserved hypothetical protein              | 3 |
| XP_009689943.1 | predicted protein                           | 3 |
| XP_009689056.1 | conserved hypothetical protein              | 3 |
| XP_009690357.1 | uncharacterized protein                     | 3 |
| XP_009692439.1 | conserved hypothetical protein              | 3 |
| XP_009690632.1 | conserved hypothetical protein              | 3 |
| XP_009691954.1 | uncharacterized protein                     | 3 |
| XP_009692070.1 | protein kinase                              | 3 |
| XP_009691400.1 | aspartyl-tRNA synthetase                    | 3 |
| XP_009691002.1 | conserved hypothetical protein              | 3 |
| XP_009689144.1 | uncharacterized protein                     | 3 |
| XP_009690155.1 | conserved hypothetical protein              | 3 |
| XP_009692309.1 | uncharacterized protein                     | 3 |
| XP_009689128.1 | conserved hypothetical protein              | 3 |
| XP_009690557.1 | DNA replication licensing factor            | 3 |
| XP_009691320.1 | conserved hypothetical protein              | 3 |
| XP_009692025.1 | conserved hypothetical protein              | 3 |
| XP_009691488.1 | pentatricopeptide repeat containing protein | 3 |
| XP_009690886.1 | conserved hypothetical protein              | 3 |
| XP_009691641.1 | conserved hypothetical protein              | 3 |
| XP_009691146.1 | zinc transport protein                      | 3 |
| XP_009689068.1 | uncharacterized protein                     | 3 |
| XP_009689378.1 | conserved hypothetical protein              | 3 |
| XP_009690734.1 | conserved hypothetical protein              | 3 |
| XP_009689569.1 | conserved hypothetical protein              | 3 |
| XP_009691279.1 | conserved hypothetical protein              | 3 |
| XP_009690741.1 | HEAT repeat containing protein              | 3 |
| XP_009691672.1 | uncharacterized protein                     | 3 |
| XP_009692453.1 | uncharacterized protein                     | 3 |
| XP_009689603.1 | recombinational repair protein              | 3 |
| XP_009691582.1 | uncharacterized protein                     | 3 |
| XP_009690720.1 | Ngp                                         | 3 |
| XP_009690120.1 | conserved hypothetical protein              | 3 |
| XP_009689904.1 | predicted protein                           | 3 |
| XP_009689008.1 | prohibitin                                  | 3 |
| XP_009690199.1 | conserved hypothetical protein              | 3 |
| XP_009689942.1 | uncharacterized protein                     | 3 |
| XP_009690381.1 | uncharacterized protein                     | 3 |

|                |                                             |   |
|----------------|---------------------------------------------|---|
| XP_009692316.1 | RNA polymerase small subunit                | 3 |
| XP_009690935.1 | uncharacterized protein                     | 3 |
| XP_009690173.1 | DNA repair protein Rad50                    | 3 |
| XP_009692779.1 | tRNA modification GTPase                    | 3 |
| XP_009691446.1 | proteasome subunit                          | 3 |
| XP_009692157.1 | heat-shock protein HSP70                    | 3 |
| XP_009689530.1 | uncharacterized protein                     | 3 |
| XP_009689263.1 | uncharacterized protein                     | 3 |
| XP_009689152.1 | uncharacterized protein                     | 3 |
| XP_009692586.1 | conserved hypothetical protein              | 3 |
| XP_009691630.1 | uncharacterized protein                     | 3 |
| XP_009689806.1 | uncharacterized protein                     | 3 |
| XP_009690532.1 | uncharacterized protein                     | 3 |
| XP_009691315.1 | conserved hypothetical protein              | 3 |
| XP_009692180.1 | conserved hypothetical protein              | 3 |
| XP_009689276.1 | myosin a                                    | 3 |
| XP_009691685.1 | chaperonin CPN60                            | 3 |
| XP_012965617.1 | cytochrome c oxidase subunit 1              | 3 |
| XP_009692682.1 | hypothetical protein                        | 3 |
| XP_009692096.1 | uncharacterized protein                     | 3 |
| XP_009692456.1 | hypothetical protein                        | 3 |
| XP_009691373.1 | major facilitator superfamily MFS-1 protein | 3 |
| XP_009692418.1 | serine/threonine protein phosphatase        | 3 |
| XP_009689096.1 | uncharacterized protein                     | 3 |
| XP_009691538.1 | conserved hypothetical protein              | 3 |
| XP_009690100.1 | uncharacterized protein                     | 3 |
| XP_009690265.1 | uncharacterized protein                     | 3 |
| XP_009692176.1 | protein kinase                              | 3 |
| XP_009688834.1 | conserved hypothetical protein              | 3 |
| XP_009690585.1 | sulfate transporter                         | 3 |
| XP_009692584.1 | conserved hypothetical protein              | 3 |
| XP_009691372.1 | ubiquitin carrier protein                   | 3 |
| XP_009692783.1 | conserved hypothetical protein              | 3 |
| XP_009689347.1 | conserved hypothetical protein              | 3 |
| XP_009689398.1 | splicing factor                             | 3 |
| XP_009689478.1 | uncharacterized protein                     | 3 |
| XP_009691635.1 | Conserved hypothetical protein              | 3 |
| XP_009689691.1 | DNA polymerase delta catalytic subunit      | 3 |
| XP_009689544.1 | uncharacterized protein                     | 3 |

|                |                                                           |   |
|----------------|-----------------------------------------------------------|---|
| XP_009691961.1 | phosphoinositide binding protein                          | 3 |
| XP_009692507.1 | uncharacterized protein                                   | 3 |
| XP_009690434.1 | conserved hypothetical protein                            | 3 |
| XP_009690438.1 | uncharacterized protein                                   | 3 |
| XP_009691696.1 | conserved hypothetical protein                            | 3 |
| XP_009689974.1 | conserved hypothetical protein                            | 3 |
| XP_009692357.1 | conserved hypothetical protein                            | 3 |
| XP_009689224.1 | predicted protein                                         | 3 |
| XP_009691426.1 | adenosine monophosphate deaminase 2 (isoform L) isoform 3 | 3 |
| XP_009692331.1 | uncharacterized protein                                   | 3 |
| XP_009689780.1 | conserved hypothetical protein                            | 3 |
| XP_009690141.1 | eukaryotic translation initiation factor 4a               | 3 |
| XP_009690471.1 | uncharacterized protein                                   | 3 |
| XP_009692428.1 | conserved hypothetical protein                            | 3 |
| XP_009691647.1 | DNA replication licensing factor                          | 3 |
| XP_009690714.1 | uncharacterized protein                                   | 3 |
| XP_009690181.1 | uncharacterized protein                                   | 3 |
| XP_009692065.1 | Hbeta58/Vps26 protein                                     | 3 |
| XP_009690302.1 | T-complex protein 1 epsilon subunit                       | 3 |
| XP_009692637.1 | conserved hypothetical protein                            | 3 |
| XP_009690506.1 | conserved hypothetical protein                            | 3 |
| XP_009690524.1 | conserved hypothetical protein                            | 3 |
| XP_009689543.1 | conserved hypothetical protein                            | 3 |
| XP_009692464.1 | conserved hypothetical protein                            | 3 |
| XP_009690923.1 | conserved hypothetical protein                            | 3 |
| XP_009691201.1 | protein farnesyltransferase subunit alpha                 | 3 |
| XP_009689949.1 | conserved hypothetical protein                            | 3 |
| XP_009692193.1 | conserved hypothetical protein                            | 3 |
| XP_009691425.1 | conserved hypothetical protein                            | 3 |
| XP_009689052.1 | eukaryotic translation initiation factor 3 subunit 10     | 3 |
| XP_009692264.1 | uncharacterized protein                                   | 3 |
| XP_009690535.1 | centromere/microtubule binding protein                    | 3 |
| XP_009691271.1 | conserved hypothetical protein                            | 3 |
| XP_009692339.1 | conserved hypothetical protein                            | 3 |
| XP_009691027.1 | uncharacterized protein                                   | 3 |
| XP_009692342.1 | chromosome maintenance protein                            | 3 |
| XP_009691290.1 | uncharacterized protein                                   | 3 |
| XP_009690329.1 | conserved hypothetical protein                            | 3 |
| XP_009689487.1 | uncharacterized protein                                   | 3 |



|                |                                                                               |   |
|----------------|-------------------------------------------------------------------------------|---|
| XP_009688952.1 | conserved hypothetical protein                                                | 3 |
| XP_009692462.1 | conserved hypothetical protein                                                | 3 |
| XP_009692759.1 | conserved hypothetical protein                                                | 3 |
| XP_009691682.1 | conserved hypothetical protein                                                | 3 |
| XP_009691465.1 | phosphatidylinositol-4-phosphate 5-kinase                                     | 3 |
| XP_009691458.1 | uncharacterized protein                                                       | 3 |
| XP_009688852.1 | uncharacterized protein                                                       | 3 |
| XP_009692466.1 | uncharacterized protein                                                       | 3 |
| XP_009688920.1 | conserved hypothetical protein                                                | 3 |
| XP_009689268.1 | exosome complex exonuclease rrp44                                             | 3 |
| XP_009689166.1 | uncharacterized protein                                                       | 3 |
| XP_009690449.1 | uncharacterized protein                                                       | 3 |
| XP_009690194.1 | translation initiation factor IF-2                                            | 3 |
| XP_009691780.1 | conserved hypothetical protein                                                | 3 |
| XP_009689915.1 | DNA topoisomerase 2                                                           | 3 |
| XP_009691847.1 | aspartyl protease precursor                                                   | 3 |
| XP_009691540.1 | peptidyl-prolyl cis-trans isomerase                                           | 3 |
| XP_009691205.1 | uncharacterized protein                                                       | 3 |
| XP_009691525.1 | 2-C-methyl-D-erythritol 2%2C4-cyclodiphosphate synthase                       | 3 |
| XP_009691434.1 | conserved hypothetical protein                                                | 3 |
| XP_009690851.1 | conserved hypothetical protein                                                | 3 |
| XP_009691707.1 | conserved hypothetical protein                                                | 3 |
| XP_009692207.1 | serine/threonine protein kinase                                               | 3 |
| XP_009691093.1 | DEAD-box RNA helicase                                                         | 3 |
| XP_009692292.1 | uncharacterized protein                                                       | 3 |
| XP_009692640.1 | nucleosome/chromatin assembly factor                                          | 3 |
| XP_009691241.1 | conserved hypothetical protein                                                | 3 |
| XP_009690433.1 | uncharacterized protein                                                       | 3 |
| XP_009691390.1 | cleavage and polyadenylation specificity factor subunit                       | 3 |
| XP_009692367.1 | uncharacterized protein                                                       | 3 |
| XP_009692760.1 | uncharacterized protein                                                       | 3 |
| XP_009692509.1 | conserved hypothetical protein                                                | 3 |
| XP_009691816.1 | uncharacterized protein                                                       | 3 |
| XP_009689711.1 | P-type ATPase                                                                 | 3 |
| XP_009691399.1 | cell division cycle CDC48 homologue/transitional endoplasmic reticulum ATPase | 3 |
| XP_009692751.1 | uncharacterized protein                                                       | 3 |
| XP_009690335.1 | cyclin-dependent protein kinase PHO85 homologue                               | 3 |
| XP_009689442.1 | uncharacterized protein                                                       | 3 |
| XP_009689100.1 | conserved hypothetical protein                                                | 3 |

|                |                                                         |   |
|----------------|---------------------------------------------------------|---|
| XP_009689555.1 | conserved hypothetical protein                          | 3 |
| XP_009691601.1 | cysteine proteinase precursor                           | 3 |
| XP_009691483.1 | prohibitin                                              | 3 |
| XP_009691545.1 | glucose-6-phosphate isomerase                           | 3 |
| XP_009690793.1 | farnesyl-protein transferase beta subunit               | 3 |
| XP_009690604.1 | conserved hypothetical protein                          | 3 |
| XP_009692349.1 | elongation factor 1-gamma                               | 3 |
| XP_009690768.1 | conserved hypothetical protein                          | 3 |
| XP_009688839.1 | hypothetical protein                                    | 3 |
| XP_009689497.1 | Plasmodium falciparum CPW-WPC repeat containing protein | 3 |
| XP_009689971.1 | ribonuclease P subunit                                  | 3 |
| XP_009692275.1 | uncharacterized protein                                 | 3 |
| XP_009688992.1 | uncharacterized protein                                 | 3 |
| XP_009690069.1 | uncharacterized protein                                 | 3 |
| XP_009689511.1 | succinyl-Coa ligase%2C subunit                          | 3 |
| XP_009689467.1 | uncharacterized protein                                 | 3 |
| XP_009691974.1 | uncharacterized protein                                 | 3 |
| XP_009691783.1 | conserved hypothetical protein                          | 3 |
| XP_009690781.1 | uncharacterized protein                                 | 3 |
| XP_009692234.1 | conserved hypothetical protein                          | 3 |
| XP_009691166.1 | conserved hypothetical protein                          | 3 |
| XP_009689101.1 | 26S proteasome regulatory particle                      | 3 |
| XP_009692781.1 | uncharacterized protein                                 | 3 |
| XP_009690482.1 | conserved hypothetical protein                          | 3 |
| XP_009691596.1 | uncharacterized protein                                 | 3 |
| XP_009689463.1 | DNA replication licensing factor                        | 3 |
| XP_009690508.1 | conserved hypothetical protein                          | 3 |
| XP_009692363.1 | uncharacterized protein                                 | 3 |
| XP_009689232.1 | conserved hypothetical protein                          | 3 |
| XP_009689284.1 | uncharacterized protein                                 | 3 |
| XP_009689724.1 | conserved hypothetical protein                          | 3 |
| XP_009691123.1 | uncharacterized protein                                 | 3 |
| XP_009690281.1 | uncharacterized protein                                 | 3 |
| XP_009691454.1 | conserved hypothetical protein                          | 3 |
| XP_009692058.1 | conserved hypothetical protein                          | 3 |
| XP_009689973.1 | ethanolamine phosphotransferase                         | 3 |
| XP_009692557.1 | conserved hypothetical protein                          | 3 |
| XP_009691893.1 | conserved hypothetical protein                          | 3 |
| XP_009690809.1 | uncharacterized protein                                 | 3 |

|                |                                                         |   |
|----------------|---------------------------------------------------------|---|
| XP_009690665.1 | GDP-mannose pyrophosphorylase                           | 3 |
| XP_009690703.1 | CAMP-dependent protein kinase%2C beta-catalytic subunit | 3 |
| XP_009691034.1 | conserved hypothetical protein                          | 3 |
| XP_009688850.1 | conserved hypothetical protein                          | 3 |
| XP_009690686.1 | choline/ethanolamine kinase                             | 3 |
| XP_009689439.1 | DNA-directed RNA polymerase III                         | 3 |
| XP_009692243.1 | ankyrin repeat containing protein                       | 3 |
| XP_009692136.1 | conserved hypothetical protein                          | 3 |
| XP_009692392.1 | conserved hypothetical protein                          | 3 |
| XP_009689866.1 | hydrolase                                               | 3 |
| XP_009689060.1 | uncharacterized protein                                 | 3 |
| XP_009692037.1 | uncharacterized protein                                 | 3 |
| XP_009689417.1 | conserved hypothetical protein                          | 3 |
| XP_009691620.1 | bifunctional nuclease                                   | 3 |
| XP_009692365.1 | dimethyladenosine transferase                           | 3 |
| XP_009691460.1 | replication factor                                      | 3 |
| XP_009690342.1 | conserved hypothetical protein                          | 3 |
| XP_009692047.1 | endopeptidase ATP-binding subunit                       | 3 |
| XP_009691662.1 | uncharacterized protein                                 | 3 |
| XP_009692031.1 | conserved hypothetical protein                          | 3 |
| XP_009691817.1 | uncharacterized protein                                 | 3 |
| XP_009692414.1 | uncharacterized protein                                 | 3 |
| XP_009689639.1 | conserved hypothetical protein                          | 3 |
| XP_009689293.1 | conserved hypothetical protein                          | 3 |
| XP_009690775.1 | uncharacterized protein                                 | 3 |
| XP_009689710.1 | uncharacterized protein                                 | 3 |
| XP_009692105.1 | conserved hypothetical protein                          | 3 |
| XP_009692688.1 | uncharacterized protein                                 | 3 |
| XP_009690365.1 | uncharacterized protein                                 | 3 |
| XP_009689064.1 | conserved hypothetical protein                          | 3 |
| XP_009692287.1 | cytosol aminopeptidase                                  | 3 |
| XP_009689164.1 | proliferation-associated protein 2g4                    | 3 |
| XP_009692569.1 | uncharacterized protein                                 | 2 |
| XP_009692269.1 | conserved hypothetical protein                          | 2 |
| XP_009692072.1 | conserved hypothetical protein                          | 2 |
| XP_009690085.1 | uncharacterized protein                                 | 2 |
| XP_009691524.1 | uncharacterized protein                                 | 2 |
| XP_009689850.1 | conserved hypothetical protein                          | 2 |
| XP_009692583.1 | uncharacterized protein                                 | 2 |

|                |                                                                        |   |
|----------------|------------------------------------------------------------------------|---|
| XP_009692458.1 | DNA-directed RNA polymerase                                            | 2 |
| XP_009690687.1 | choline/ethanolamine kinase                                            | 2 |
| XP_009690619.1 | conserved hypothetical protein                                         | 2 |
| XP_009692144.1 | uncharacterized protein                                                | 2 |
| XP_009692192.1 | hypothetical protein                                                   | 2 |
| XP_009690576.1 | nucleolar protein Nop5                                                 | 2 |
| XP_009691573.1 | casein kinase                                                          | 2 |
| XP_009691234.1 | conserved hypothetical protein                                         | 2 |
| XP_009689772.1 | conserved hypothetical protein                                         | 2 |
| XP_009691182.1 | conserved hypothetical protein                                         | 2 |
| XP_009690237.1 | conserved hypothetical protein                                         | 2 |
| XP_009690505.1 | conserved hypothetical protein                                         | 2 |
| XP_009692252.1 | conserved hypothetical protein                                         | 2 |
| XP_009691361.1 | conserved hypothetical protein                                         | 2 |
| XP_009692739.1 | conserved hypothetical protein                                         | 2 |
| XP_009692651.1 | splicing factor 3b subunit                                             | 2 |
| XP_009692383.1 | branched-chain alpha-keto acid dihydrolipoyl acyltransferase precursor | 2 |
| XP_009689168.1 | conserved hypothetical protein                                         | 2 |
| XP_009689675.1 | conserved hypothetical protein                                         | 2 |
| XP_009689446.1 | hypothetical protein                                                   | 2 |
| XP_009689421.1 | adenylate kinase                                                       | 2 |
| XP_009690932.1 | conserved hypothetical protein                                         | 2 |
| XP_009690837.1 | conserved hypothetical protein                                         | 2 |
| XP_009689148.1 | uncharacterized protein                                                | 2 |
| XP_009690546.1 | uncharacterized protein                                                | 2 |
| XP_009691247.1 | uncharacterized protein                                                | 2 |
| XP_009688949.1 | ubiquitin-activating enzyme E1                                         | 2 |
| XP_009691982.1 | ubiquitin-like protease                                                | 2 |
| XP_009691459.1 | DEAD-box family RNA helicase                                           | 2 |
| XP_009691349.1 | zinc transport protein                                                 | 2 |
| XP_009690016.1 | conserved hypothetical protein                                         | 2 |
| XP_009692548.1 | uncharacterized protein                                                | 2 |
| XP_009689153.1 | conserved hypothetical protein                                         | 2 |
| XP_009692124.1 | conserved hypothetical protein                                         | 2 |
| XP_009691470.1 | protein disulphide isomerase                                           | 2 |
| XP_009689621.1 | conserved hypothetical protein                                         | 2 |
| XP_009691536.1 | conserved hypothetical protein                                         | 2 |
| XP_009689696.1 | uncharacterized protein                                                | 2 |
| XP_009691941.1 | conserved hypothetical protein                                         | 2 |

|                |                                                      |   |
|----------------|------------------------------------------------------|---|
| XP_009692150.1 | hypothetical protein                                 | 2 |
| XP_009691976.1 | uncharacterized protein                              | 2 |
| XP_009689440.1 | hypothetical protein                                 | 2 |
| XP_009689853.1 | conserved hypothetical protein                       | 2 |
| XP_009689708.1 | conserved hypothetical protein                       | 2 |
| XP_009689884.1 | kinesin                                              | 2 |
| XP_009691732.1 | conserved hypothetical protein                       | 2 |
| XP_009691417.1 | origin recognition complex protein 1                 | 2 |
| XP_009692463.1 | DNA-directed RNA polymerase                          | 2 |
| XP_009690547.1 | ATP-dependent RNA helicase                           | 2 |
| XP_009692225.1 | uncharacterized protein                              | 2 |
| XP_009689814.1 | conserved hypothetical protein                       | 2 |
| XP_009689220.1 | conserved hypothetical protein                       | 2 |
| XP_009690839.1 | conserved hypothetical protein                       | 2 |
| XP_009692291.1 | conserved hypothetical protein                       | 2 |
| XP_009692109.1 | uncharacterized protein                              | 2 |
| XP_009691631.1 | uncharacterized protein                              | 2 |
| XP_009690200.1 | uncharacterized protein                              | 2 |
| XP_009691017.1 | aldo-keto reductase                                  | 2 |
| XP_009690733.1 | calcium-dependent protein kinase                     | 2 |
| XP_009690219.1 | uncharacterized protein                              | 2 |
| XP_009692080.1 | ubiquitin carboxyl-terminal hydrolase                | 2 |
| XP_009691105.1 | hypothetical protein                                 | 2 |
| XP_009692160.1 | uncharacterized protein                              | 2 |
| XP_009690516.1 | uncharacterized protein                              | 2 |
| XP_009690667.1 | uncharacterized protein                              | 2 |
| XP_009692239.1 | SWI/SNF-related chromatin remodelling factor         | 2 |
| XP_009689407.1 | uncharacterized protein                              | 2 |
| XP_009689836.1 | uncharacterized protein                              | 2 |
| XP_009691338.1 | uncharacterized protein                              | 2 |
| XP_009689123.1 | predicted protein                                    | 2 |
| XP_009692067.1 | conserved hypothetical protein                       | 2 |
| XP_009689771.1 | conserved hypothetical protein                       | 2 |
| XP_009690803.1 | conserved hypothetical protein                       | 2 |
| XP_009691125.1 | eukaryotic translation initiation factor 3 subunit 7 | 2 |
| XP_009688924.1 | protein transport protein sec24-like                 | 2 |
| XP_009692218.1 | conserved hypothetical protein                       | 2 |
| XP_009689433.1 | uncharacterized protein                              | 2 |
| XP_009692578.1 | conserved hypothetical protein                       | 2 |

|                |                                                          |   |
|----------------|----------------------------------------------------------|---|
| XP_009692059.1 | conserved hypothetical protein                           | 2 |
| XP_009690596.1 | uncharacterized protein                                  | 2 |
| XP_009691715.1 | conserved hypothetical protein                           | 2 |
| XP_009691562.1 | conserved hypothetical protein                           | 2 |
| XP_009692540.1 | conserved hypothetical protein                           | 2 |
| XP_009691567.1 | uncharacterized protein                                  | 2 |
| XP_009692103.1 | conserved hypothetical protein                           | 2 |
| XP_009690343.1 | conserved hypothetical protein                           | 2 |
| XP_009692700.1 | Pumilio RNA-binding region repeat containing protein     | 2 |
| XP_009691250.1 | conserved hypothetical protein                           | 2 |
| XP_009689508.1 | conserved hypothetical protein                           | 2 |
| XP_009691351.1 | DAZ-associated protein 1                                 | 2 |
| XP_009690184.1 | phenylalanyl-tRNA synthetase                             | 2 |
| XP_009690346.1 | uncharacterized protein                                  | 2 |
| XP_009692203.1 | conserved hypothetical protein                           | 2 |
| XP_009690076.1 | hypothetical protein                                     | 2 |
| XP_009689001.1 | uncharacterized protein                                  | 2 |
| XP_009690493.1 | uncharacterized protein                                  | 2 |
| XP_009689758.1 | uncharacterized protein                                  | 2 |
| XP_009689053.1 | uncharacterized protein                                  | 2 |
| XP_009692343.1 | conserved hypothetical protein                           | 2 |
| XP_009691322.1 | nicotinate-nucleotide adenyltransferase-like protein     | 2 |
| XP_009691750.1 | protein kinase                                           | 2 |
| XP_009689644.1 | eukaryotic translation initiation factor 2 subunit alpha | 2 |
| XP_009691600.1 | uncharacterized protein                                  | 2 |
| XP_009691255.1 | conserved hypothetical protein                           | 2 |
| XP_009689629.1 | uncharacterized protein                                  | 2 |
| XP_009692283.1 | uncharacterized protein                                  | 2 |
| XP_009691477.1 | uncharacterized protein                                  | 2 |
| XP_009691332.1 | conserved hypothetical protein                           | 2 |
| XP_009690420.1 | ABC transporter                                          | 2 |
| XP_009690118.1 | uncharacterized protein                                  | 2 |
| XP_009692182.1 | conserved hypothetical protein                           | 2 |
| XP_009689731.1 | transitional endoplasmic reticulum ATPase                | 2 |
| XP_009690630.1 | proliferating cell nuclear antigen 2                     | 2 |
| XP_009689154.1 | uncharacterized protein                                  | 2 |
| XP_009689593.1 | conserved hypothetical protein                           | 2 |
| XP_009689169.1 | protein transport protein sec24-like                     | 2 |
| XP_009692368.1 | RNA polymerases I and III subunit                        | 2 |

|                |                                                                      |   |
|----------------|----------------------------------------------------------------------|---|
| XP_009692619.1 | conserved hypothetical protein                                       | 2 |
| XP_009692301.1 | prohibitin-like protein                                              | 2 |
| XP_009689182.1 | ATP synthase subunit beta                                            | 2 |
| XP_009692005.1 | uncharacterized protein                                              | 2 |
| XP_009689189.1 | uncharacterized protein                                              | 2 |
| XP_009691611.1 | conserved hypothetical protein                                       | 2 |
| XP_009690920.1 | CTP synthase                                                         | 2 |
| XP_009691185.1 | peptide chain release factor 2                                       | 2 |
| XP_009689275.1 | hypothetical protein                                                 | 2 |
| XP_009691343.1 | tRNA nucleotidyltransferase                                          | 2 |
| XP_009690123.1 | long-chain acyl-CoA synthetase                                       | 2 |
| XP_009689359.1 | conserved hypothetical protein                                       | 2 |
| XP_009689599.1 | conserved hypothetical protein                                       | 2 |
| XP_009689657.1 | splicing factor                                                      | 2 |
| XP_009691594.1 | conserved hypothetical protein                                       | 2 |
| XP_009689213.1 | serine-threonine protein kinase                                      | 2 |
| XP_009692667.1 | predicted protein                                                    | 2 |
| XP_009690959.1 | uncharacterized protein                                              | 2 |
| XP_009691490.1 | RNA processing factor                                                | 2 |
| XP_009692806.1 | conserved hypothetical protein                                       | 2 |
| XP_009691103.1 | elongation factor g 1%2C mitochondrial                               | 2 |
| XP_009691806.1 | 4-methyl-5(b-hydroxyethyl)-thiazol monophosphate biosynthesis enzyme | 2 |
| XP_009692715.1 | conserved hypothetical protein                                       | 2 |
| XP_009689266.1 | conserved hypothetical protein                                       | 2 |
| XP_009690166.1 | heat shock protein                                                   | 2 |
| XP_009692784.1 | conserved hypothetical protein                                       | 2 |
| XP_009690057.1 | conserved hypothetical protein                                       | 2 |
| XP_009689732.1 | uncharacterized protein                                              | 2 |
| XP_009689011.1 | peptidyl-prolyl cis-trans isomerase                                  | 2 |
| XP_009691253.1 | hypothetical protein                                                 | 2 |
| XP_009691200.1 | conserved hypothetical protein                                       | 2 |
| XP_009691283.1 | conserved hypothetical protein                                       | 2 |
| XP_009690485.1 | ABC transporter                                                      | 2 |
| XP_009692443.1 | 26S proteasome regulatory subunit                                    | 2 |
| XP_009689149.1 | conserved hypothetical protein                                       | 2 |
| XP_009690631.1 | hypothetical protein                                                 | 2 |
| XP_009692145.1 | conserved hypothetical protein                                       | 2 |
| XP_009689539.1 | disrupter of silencing protein                                       | 2 |
| XP_009690183.1 | uncharacterized protein                                              | 2 |

|                |                                                      |   |
|----------------|------------------------------------------------------|---|
| XP_009689601.1 | aspartyl protease                                    | 2 |
| XP_009692029.1 | DEAD-box family ATP-dependent helicase               | 2 |
| XP_009691481.1 | neutral sphingomyelinase                             | 2 |
| XP_009690410.1 | U1/2 small nuclear ribonucleoprotein                 | 2 |
| XP_009689386.1 | uncharacterized protein                              | 2 |
| XP_009689230.1 | tRNA delta (2)-isopentenylpyrophosphate transferase  | 2 |
| XP_009690520.1 | uncharacterized protein                              | 2 |
| XP_009692512.1 | uncharacterized protein                              | 2 |
| XP_009689978.1 | uncharacterized protein                              | 2 |
| XP_009689450.1 | ABC transporter                                      | 2 |
| XP_009690206.1 | erythrocyte membrane-associated malaria antigen-like | 2 |
| XP_009689954.1 | major facilitator superfamily MFS-1 protein          | 2 |
| XP_009691433.1 | conserved hypothetical protein                       | 2 |
| XP_009692446.1 | uncharacterized protein                              | 2 |
| XP_009689683.1 | uncharacterized protein                              | 2 |
| XP_009690306.1 | major facilitator superfamily MFS-1 protein          | 2 |
| XP_009689515.1 | uncharacterized protein                              | 2 |
| XP_009690709.1 | conserved hypothetical protein                       | 2 |
| XP_009688984.1 | uncharacterized protein                              | 2 |
| XP_009692777.1 | uncharacterized protein                              | 2 |
| XP_009689712.1 | DEAD-box family RNA helicase                         | 2 |
| XP_009690444.1 | uncharacterized protein                              | 2 |
| XP_009692605.1 | hypothetical protein                                 | 2 |
| XP_009690904.1 | conserved hypothetical protein                       | 2 |
| XP_009692450.1 | transcription factor                                 | 2 |
| XP_009692417.1 | 26S proteasome regulatory subunit                    | 2 |
| XP_009691155.1 | conserved hypothetical protein                       | 2 |
| XP_009689951.1 | conserved hypothetical protein                       | 2 |
| XP_009689729.1 | SWI/SNF family transcriptional activator protein     | 2 |
| XP_009690894.1 | uncharacterized protein                              | 2 |
| XP_009692219.1 | replication factor C                                 | 2 |
| XP_009689330.1 | tryptophanyl-tRNA synthetase                         | 2 |
| XP_009690236.1 | transporter protein cg10                             | 2 |
| XP_009689142.1 | Conserved hypothetical protein                       | 2 |
| XP_009689773.1 | conserved hypothetical protein                       | 2 |
| XP_009690050.1 | conserved hypothetical protein                       | 2 |
| XP_009691381.1 | conserved hypothetical protein                       | 2 |
| XP_009689728.1 | conserved hypothetical protein                       | 2 |
| XP_009691152.1 | uncharacterized protein                              | 2 |



|                |                                             |   |
|----------------|---------------------------------------------|---|
| XP_009689906.1 | conserved hypothetical protein              | 2 |
| XP_009688945.1 | uncharacterized protein                     | 2 |
| XP_009690820.1 | uncharacterized protein                     | 2 |
| XP_009688936.1 | uncharacterized protein                     | 2 |
| XP_009691559.1 | uncharacterized protein                     | 2 |
| XP_009691789.1 | hypothetical protein                        | 2 |
| XP_009689700.1 | uncharacterized protein                     | 2 |
| XP_009691736.1 | conserved hypothetical protein              | 2 |
| XP_009689727.1 | uncharacterized protein                     | 2 |
| XP_009689357.1 | ribosomal protein L3                        | 2 |
| XP_009689769.1 | conserved hypothetical protein              | 2 |
| XP_009690594.1 | proteasome subunit y                        | 2 |
| XP_009690523.1 | conserved hypothetical protein              | 2 |
| XP_009689917.1 | conserved hypothetical protein              | 2 |
| XP_009692163.1 | uncharacterized protein                     | 2 |
| XP_009689080.1 | prefoldin subunit                           | 2 |
| XP_009691788.1 | uncharacterized protein                     | 2 |
| XP_009689471.1 | clathrin-adaptor chain                      | 2 |
| XP_009689913.1 | metalloprotease/cell division cycle protein | 2 |
| XP_009690755.1 | major facilitator superfamily MFS-1 protein | 2 |
| XP_009692030.1 | serine/threonine kinase                     | 2 |
| XP_009690590.1 | uncharacterized protein                     | 2 |
| XP_009692016.1 | uncharacterized protein                     | 2 |
| XP_009690164.1 | histone acetyltransferase-like protein      | 2 |
| XP_009692120.1 | conserved hypothetical protein              | 2 |
| XP_009691717.1 | uncharacterized protein                     | 2 |
| XP_009692249.1 | conserved hypothetical protein              | 2 |
| XP_009692599.1 | conserved hypothetical protein              | 2 |
| XP_009688909.1 | conserved hypothetical protein              | 2 |
| XP_009689744.1 | mitochondrial inner membrane subunit        | 2 |
| XP_009690196.1 | uncharacterized protein                     | 2 |
| XP_009692004.1 | conserved hypothetical protein              | 2 |
| XP_009690958.1 | conserved hypothetical protein              | 2 |
| XP_009691669.1 | inosine-5'-monophosphate dehydrogenase      | 2 |
| XP_009690512.1 | conserved hypothetical protein              | 2 |
| XP_009692684.1 | U5 snRNP-specific subunit                   | 2 |
| XP_009691303.1 | uncharacterized protein                     | 2 |
| XP_009691059.1 | uncharacterized protein                     | 2 |
| XP_009691568.1 | uncharacterized protein                     | 2 |

|                |                                                                                      |   |
|----------------|--------------------------------------------------------------------------------------|---|
| XP_009690261.1 | conserved hypothetical protein                                                       | 2 |
| XP_009690389.1 | uncharacterized protein                                                              | 2 |
| XP_009691231.1 | conserved hypothetical protein                                                       | 2 |
| XP_009691903.1 | uncharacterized protein                                                              | 2 |
| XP_009689968.1 | uncharacterized protein                                                              | 2 |
| XP_009688916.1 | uncharacterized protein                                                              | 2 |
| XP_009692581.1 | vesicle transport protein                                                            | 2 |
| XP_009689638.1 | conserved hypothetical protein                                                       | 2 |
| XP_009691606.1 | uncharacterized protein                                                              | 2 |
| XP_009690035.1 | conserved hypothetical protein                                                       | 2 |
| XP_009690311.1 | conserved hypothetical protein                                                       | 2 |
| XP_009690072.1 | inorganic pyrophosphatase                                                            | 2 |
| XP_009692683.1 | 26S proteasome ATPase subunit                                                        | 2 |
| XP_009690943.1 | protein phosphatase 2C homolog 2                                                     | 2 |
| XP_009689058.1 | T-complex protein 1 delta subunit                                                    | 2 |
| XP_009689461.1 | minichromosome maintenance protein                                                   | 2 |
| XP_009689770.1 | uncharacterized protein                                                              | 2 |
| XP_009690445.1 | uncharacterized protein                                                              | 2 |
| XP_009690431.1 | calcium-dependent protein kinase                                                     | 2 |
| XP_009691193.1 | hypothetical protein                                                                 | 2 |
| XP_009689412.1 | uncharacterized protein                                                              | 2 |
| XP_009690880.1 | conserved hypothetical protein                                                       | 2 |
| XP_009689849.1 | uncharacterized protein                                                              | 2 |
| XP_009691728.1 | conserved hypothetical protein                                                       | 2 |
| XP_009692574.1 | conserved hypothetical protein                                                       | 2 |
| XP_009689422.1 | diphthine synthase                                                                   | 2 |
| XP_009690467.1 | uncharacterized protein                                                              | 2 |
| XP_009690939.1 | hypothetical protein                                                                 | 2 |
| XP_009690871.1 | hypothetical protein                                                                 | 2 |
| XP_009689525.1 | ribonucleotide reductase R2 subunit/ribonucleoside-diphosphate reductase small chain | 2 |
| XP_009692057.1 | cell-cycle-related serine/threonine protein kinase                                   | 2 |
| XP_009691072.1 | conserved hypothetical protein                                                       | 2 |
| XP_009691484.1 | uncharacterized protein                                                              | 2 |
| XP_009689615.1 | uncharacterized protein                                                              | 2 |
| XP_009691874.1 | hypothetical protein                                                                 | 2 |
| XP_009692386.1 | uncharacterized protein                                                              | 2 |
| XP_009692612.1 | lipid-binding/transfer protein                                                       | 2 |
| XP_009692380.1 | uncharacterized protein                                                              | 2 |
| XP_009690142.1 | methionine-tRNA ligase                                                               | 2 |

|                |                                                    |   |
|----------------|----------------------------------------------------|---|
| XP_009691221.1 | conserved hypothetical protein                     | 2 |
| XP_009689521.1 | conserved hypothetical protein                     | 2 |
| XP_009692703.1 | leucine carboxyl methyltransferase                 | 2 |
| XP_009689221.1 | conserved hypothetical protein                     | 2 |
| XP_009691061.1 | ADP-ribosylation factor                            | 2 |
| XP_009689012.1 | NifU protein                                       | 2 |
| XP_009692104.1 | 16S rRNA processing protein                        | 2 |
| XP_009689654.1 | GMP synthase                                       | 2 |
| XP_009689756.1 | uncharacterized protein                            | 2 |
| XP_009692452.1 | splicing factor                                    | 2 |
| XP_009690125.1 | conserved hypothetical protein                     | 2 |
| XP_009691624.1 | uncharacterized protein                            | 2 |
| XP_009692587.1 | peptide chain release factor                       | 2 |
| XP_009692233.1 | isocitrate dehydrogenase                           | 2 |
| XP_009689857.1 | HR1 rho-binding repeat containing protein          | 2 |
| XP_009690315.1 | hypothetical protein                               | 2 |
| XP_009691148.1 | conserved hypothetical protein                     | 2 |
| XP_009691494.1 | uncharacterized protein                            | 2 |
| XP_009691688.1 | Fasciclin-2-like protein                           | 2 |
| XP_009690416.1 | uncharacterized protein                            | 2 |
| XP_009692660.1 | conserved hypothetical protein                     | 2 |
| XP_009692814.1 | ferredoxin                                         | 2 |
| XP_009691811.1 | cytochrome reductase                               | 2 |
| XP_009692293.1 | predicted protein                                  | 2 |
| XP_009692305.1 | small GTPase                                       | 2 |
| XP_009690816.1 | conserved hypothetical protein                     | 2 |
| XP_009691368.1 | glucose-6-phosphate/phosphate translocator         | 2 |
| XP_009692534.1 | coat protein%2C gamma subunit                      | 2 |
| XP_009689489.1 | hypothetical protein                               | 2 |
| XP_009689713.1 | DEAD-box family RNA helicase                       | 2 |
| XP_009690621.1 | uncharacterized protein                            | 2 |
| XP_009689870.1 | HAD-superfamily hydrolase%2C subfamily IIB protein | 2 |
| XP_009691076.1 | uncharacterized protein                            | 2 |
| XP_009690713.1 | calmodulin                                         | 2 |
| XP_009690351.1 | apurinic/apurimidinic endonuclease                 | 2 |
| XP_009692716.1 | hypothetical protein                               | 2 |
| XP_009691311.1 | conserved hypothetical protein                     | 2 |
| XP_009690731.1 | conserved hypothetical protein                     | 2 |
| XP_009690669.1 | conserved hypothetical protein                     | 2 |

|                |                                     |   |
|----------------|-------------------------------------|---|
| XP_009690658.1 | serine/threonine protein kinase     | 2 |
| XP_009691236.1 | aspartyl(acid) protease             | 2 |
| XP_009690084.1 | conserved hypothetical protein      | 2 |
| XP_009689003.1 | uncharacterized protein             | 2 |
| XP_009690158.1 | hypothetical protein                | 2 |
| XP_009691557.1 | peptidyl-prolyl cis-trans isomerase | 2 |
| XP_009688897.1 | hypothetical protein                | 2 |
| XP_009690515.1 | vacuolar ATP synthase subunit D     | 2 |
| XP_009692093.1 | conserved hypothetical protein      | 2 |
| XP_009692101.1 | ribosomal protein S2                | 2 |
| XP_009692580.1 | uncharacterized protein             | 2 |
| XP_009689482.1 | conserved hypothetical protein      | 2 |
| XP_009690135.1 | uncharacterized protein             | 2 |
| XP_009692658.1 | uncharacterized protein             | 2 |
| XP_009691044.1 | hypothetical protein                | 2 |
| XP_009690889.1 | asparaginyl-tRNA synthetase         | 2 |
| XP_009691650.1 | conserved hypothetical protein      | 2 |
| XP_009689358.1 | hypothetical protein                | 2 |
| XP_009692186.1 | conserved hypothetical protein      | 2 |
| XP_009688993.1 | conserved hypothetical protein      | 2 |
| XP_009688857.1 | alkylated DNA repair protein        | 2 |
| XP_009689279.1 | conserved hypothetical protein      | 2 |
| XP_009690282.1 | 50S ribosomal protein L9            | 2 |
| XP_009690161.1 | uncharacterized protein             | 2 |
| XP_009691398.1 | DNA mismatch repair protein         | 2 |
| XP_009690537.1 | uncharacterized protein             | 2 |
| XP_009692174.1 | histone H4                          | 2 |
| XP_009690841.1 | uncharacterized protein             | 2 |
| XP_009691330.1 | uncharacterized protein             | 2 |
| XP_009690472.1 | conserved hypothetical protein      | 2 |
| XP_009691224.1 | RNA splicing factor                 | 2 |
| XP_009692141.1 | enolase                             | 2 |
| XP_009690928.1 | uncharacterized protein             | 2 |
| XP_009689290.1 | conserved hypothetical protein      | 2 |
| XP_009691990.1 | beta-tubulin cofactor D             | 2 |
| XP_009689642.1 | uncharacterized protein             | 2 |
| XP_009692492.1 | conserved hypothetical protein      | 2 |
| XP_009690773.1 | conserved hypothetical protein      | 2 |
| XP_009690328.1 | conserved hypothetical protein      | 2 |

|                |                                       |   |
|----------------|---------------------------------------|---|
| XP_009691049.1 | hypothetical protein                  | 2 |
| XP_009690892.1 | ankyrin repeat containing protein     | 2 |
| XP_009691299.1 | conserved hypothetical protein        | 2 |
| XP_009689391.1 | conserved hypothetical protein        | 2 |
| XP_009691861.1 | 26S proteasome regulatory subunit     | 2 |
| XP_009690323.1 | conserved hypothetical protein        | 2 |
| XP_009692196.1 | uncharacterized protein               | 2 |
| XP_009691671.1 | hypothetical protein                  | 2 |
| XP_009691086.1 | conserved hypothetical protein        | 2 |
| XP_009690628.1 | peptidyl-prolyl cis-trans isomerase   | 2 |
| XP_009692519.1 | 40S ribosomal protein S9              | 2 |
| XP_009690912.1 | uncharacterized protein               | 2 |
| XP_009689310.1 | conserved hypothetical protein        | 2 |
| XP_009690151.1 | conserved hypothetical protein        | 2 |
| XP_009692570.1 | RNA-binding protein Puf1              | 2 |
| XP_009691832.1 | conserved hypothetical protein        | 2 |
| XP_009690648.1 | uncharacterized protein               | 2 |
| XP_009691690.1 | snRNP splicing factor U2AF            | 2 |
| XP_009692588.1 | peptide chain release factor          | 2 |
| XP_009691702.1 | conserved hypothetical protein        | 2 |
| XP_009692524.1 | cell surface/extracellular protein    | 2 |
| XP_009690204.1 | serine/threonine protein kinase       | 2 |
| XP_009691342.1 | tRNA nucleotidyltransferase           | 2 |
| XP_009690314.1 | conserved hypothetical protein        | 2 |
| XP_009690805.1 | uncharacterized protein               | 2 |
| XP_009692255.1 | papain-family cysteine protease       | 2 |
| XP_009692359.1 | conserved hypothetical protein        | 1 |
| XP_009691387.1 | glucose-6-phosphate-1-dehydrogenase   | 1 |
| XP_009692282.1 | uncharacterized protein               | 1 |
| XP_009690814.1 | conserved hypothetical protein        | 1 |
| XP_009690777.1 | serine/threonine-protein kinase ripk4 | 1 |
| XP_009689000.1 | 30S ribosomal protein S11             | 1 |
| XP_009692762.1 | predicted protein                     | 1 |
| XP_009692254.1 | conserved hypothetical protein        | 1 |
| XP_009691585.1 | uncharacterized protein               | 1 |
| XP_009692424.1 | conserved hypothetical protein        | 1 |
| XP_009691815.1 | uncharacterized protein               | 1 |
| XP_009689054.1 | pre-rRNA processing protein           | 1 |
| XP_009692010.1 | conserved hypothetical protein        | 1 |

|                |                                                             |   |
|----------------|-------------------------------------------------------------|---|
| XP_009689253.1 | aspartate transcarbamoylase                                 | 1 |
| XP_009690165.1 | conserved hypothetical protein                              | 1 |
| XP_009690798.1 | conserved hypothetical protein                              | 1 |
| XP_009691576.1 | hypothetical protein                                        | 1 |
| XP_009690442.1 | conserved hypothetical protein                              | 1 |
| XP_009692499.1 | uncharacterized protein                                     | 1 |
| XP_009690254.1 | conserved hypothetical protein                              | 1 |
| XP_009689930.1 | conserved hypothetical protein                              | 1 |
| XP_009689437.1 | hypothetical protein                                        | 1 |
| XP_009691897.1 | uncharacterized protein                                     | 1 |
| XP_009691555.1 | uncharacterized protein                                     | 1 |
| XP_009691295.1 | hypothetical protein                                        | 1 |
| XP_009692661.1 | conserved hypothetical protein                              | 1 |
| XP_009691614.1 | uncharacterized protein                                     | 1 |
| XP_009691831.1 | conserved hypothetical protein                              | 1 |
| XP_009690110.1 | replication factor-A protein 1                              | 1 |
| XP_009692212.1 | vacuolar protein sorting/secretion protein                  | 1 |
| XP_009690262.1 | uncharacterized protein                                     | 1 |
| XP_009692001.1 | uncharacterized protein                                     | 1 |
| XP_009691294.1 | hypothetical protein                                        | 1 |
| XP_009688928.1 | uncharacterized protein                                     | 1 |
| XP_009691288.1 | GTP-binding protein                                         | 1 |
| XP_009692539.1 | 26S proteasome subunit                                      | 1 |
| XP_009690145.1 | conserved hypothetical protein                              | 1 |
| XP_009690094.1 | conserved hypothetical protein                              | 1 |
| XP_009691129.1 | conserved hypothetical protein                              | 1 |
| XP_009691993.1 | uncharacterized protein                                     | 1 |
| XP_009689402.1 | conserved hypothetical protein                              | 1 |
| XP_009691925.1 | conserved hypothetical protein                              | 1 |
| XP_009692436.1 | hypothetical protein                                        | 1 |
| XP_009690367.1 | uncharacterized protein                                     | 1 |
| XP_009689514.1 | conserved hypothetical protein                              | 1 |
| XP_009688873.1 | hexokinase 1                                                | 1 |
| XP_009689891.1 | uncharacterized protein                                     | 1 |
| XP_009692422.1 | conserved hypothetical protein                              | 1 |
| XP_009688941.1 | uncharacterized protein                                     | 1 |
| XP_009692707.1 | structure-specific recognition protein 1                    | 1 |
| XP_009691901.1 | conserved hypothetical protein                              | 1 |
| XP_009689568.1 | 1-phosphatidylinositol-4%2C5-bisphosphate phosphodiesterase | 1 |

|                |                                                                |   |
|----------------|----------------------------------------------------------------|---|
| XP_009691659.1 | conserved hypothetical protein                                 | 1 |
| XP_009690612.1 | peptidyl-prolyl cis-trans isomerase                            | 1 |
| XP_009689948.1 | ATPase                                                         | 1 |
| XP_009691684.1 | conserved hypothetical protein                                 | 1 |
| XP_009690269.1 | hypothetical protein                                           | 1 |
| XP_009690274.1 | falcilysin                                                     | 1 |
| XP_009690208.1 | glutaredoxin-like protein grla                                 | 1 |
| XP_009691371.1 | NADH dehydrogenase                                             | 1 |
| XP_009689326.1 | conserved hypothetical protein                                 | 1 |
| XP_009692215.1 | uncharacterized protein                                        | 1 |
| XP_009690396.1 | uncharacterized protein                                        | 1 |
| XP_009691495.1 | DEAD-box family helicase                                       | 1 |
| XP_009692490.1 | conserved hypothetical protein                                 | 1 |
| XP_009690225.1 | uncharacterized protein                                        | 1 |
| XP_009690462.1 | uncharacterized protein                                        | 1 |
| XP_009689371.1 | conserved hypothetical protein                                 | 1 |
| XP_009692071.1 | tryptophanyl-tRNA synthetase                                   | 1 |
| XP_009692582.1 | uncharacterized protein                                        | 1 |
| XP_009692159.1 | succinyl-CoA ligase [GDP-forming] alpha-chain%2C mitochondrial | 1 |
| XP_009689776.1 | uncharacterized protein                                        | 1 |
| XP_009689476.1 | uncharacterized protein                                        | 1 |
| XP_009692095.1 | hypothetical protein                                           | 1 |
| XP_009690055.1 | histone deacetylase                                            | 1 |
| XP_009689610.1 | complexed with cef1p                                           | 1 |
| XP_009692318.1 | conserved hypothetical protein                                 | 1 |
| XP_009692627.1 | conserved hypothetical protein                                 | 1 |
| XP_009690140.1 | uncharacterized protein                                        | 1 |
| XP_009689935.1 | inositol phosphatase                                           | 1 |
| XP_009690330.1 | uncharacterized protein                                        | 1 |
| XP_009690424.1 | ribosomal protein L20                                          | 1 |
| XP_009689666.1 | hypothetical protein                                           | 1 |
| XP_009690321.1 | conserved hypothetical protein                                 | 1 |
| XP_009692638.1 | conserved hypothetical protein                                 | 1 |
| XP_009689420.1 | uncharacterized protein                                        | 1 |
| XP_009692360.1 | uncharacterized protein                                        | 1 |
| XP_009688855.1 | uncharacterized protein                                        | 1 |
| XP_009689762.1 | conserved hypothetical protein                                 | 1 |
| XP_009690705.1 | glycerol kinase                                                | 1 |
| XP_009689459.1 | uncharacterized protein                                        | 1 |

|                |                                                         |   |
|----------------|---------------------------------------------------------|---|
| XP_009690999.1 | metalloprotease                                         | 1 |
| XP_009690277.1 | conserved hypothetical protein                          | 1 |
| XP_009689094.1 | hypothetical protein                                    | 1 |
| XP_009690379.1 | uncharacterized protein                                 | 1 |
| XP_009691915.1 | conserved hypothetical protein                          | 1 |
| XP_009688965.1 | ATP-dependent RNA helicase                              | 1 |
| XP_009691329.1 | conserved hypothetical protein                          | 1 |
| XP_009691355.1 | uncharacterized protein                                 | 1 |
| XP_009689195.1 | conserved hypothetical protein                          | 1 |
| XP_009691905.1 | ribosomal protein L15                                   | 1 |
| XP_009689283.1 | ribosomal protein S15                                   | 1 |
| XP_009691651.1 | uncharacterized protein                                 | 1 |
| XP_009692694.1 | hypothetical protein                                    | 1 |
| XP_009689454.1 | glycerophosphoryl diester phosphodiesterase             | 1 |
| XP_009691124.1 | uncharacterized protein                                 | 1 |
| XP_009692390.1 | uncharacterized protein                                 | 1 |
| XP_009692170.1 | RING-box protein 1a                                     | 1 |
| XP_009692532.1 | hypothetical protein                                    | 1 |
| XP_009689238.1 | conserved hypothetical protein                          | 1 |
| XP_009690253.1 | conserved hypothetical protein                          | 1 |
| XP_009689579.1 | uncharacterized protein                                 | 1 |
| XP_009690162.1 | DNA repair helicase                                     | 1 |
| XP_009690945.1 | conserved hypothetical protein                          | 1 |
| XP_009689469.1 | conserved hypothetical protein                          | 1 |
| XP_009692113.1 | conserved hypothetical protein                          | 1 |
| XP_009689919.1 | conserved hypothetical protein                          | 1 |
| XP_009690718.1 | uncharacterized protein                                 | 1 |
| XP_009692217.1 | conserved hypothetical protein                          | 1 |
| XP_009689828.1 | conserved hypothetical protein                          | 1 |
| XP_009689924.1 | conserved hypothetical protein                          | 1 |
| XP_009692460.1 | MAC/perforin                                            | 1 |
| XP_009692341.1 | DNA helicase                                            | 1 |
| XP_009690207.1 | conserved hypothetical protein                          | 1 |
| XP_009691077.1 | GPI anchor transamidase                                 | 1 |
| XP_009689612.1 | cyclophilin peptidyl-prolyl cis-trans isomerase protein | 1 |
| XP_009691430.1 | methionine aminopeptidase                               | 1 |
| XP_009692317.1 | uncharacterized protein                                 | 1 |
| XP_009691346.1 | palmitoyltransferase                                    | 1 |
| XP_009688922.1 | conserved hypothetical protein                          | 1 |



|                |                                                     |   |
|----------------|-----------------------------------------------------|---|
| XP_009689958.1 | eukaryotic initiation factor-2 alpha kinase-A       | 1 |
| XP_009689013.1 | 6-phosphogluconate dehydrogenase                    | 1 |
| XP_009691362.1 | hypothetical protein                                | 1 |
| XP_009689541.1 | conserved hypothetical protein                      | 1 |
| XP_009691138.1 | conserved hypothetical protein                      | 1 |
| XP_009691480.1 | uncharacterized protein                             | 1 |
| XP_009691119.1 | uncharacterized protein                             | 1 |
| XP_009691161.1 | DNA-directed RNA polymerase III                     | 1 |
| XP_009690996.1 | uncharacterized protein                             | 1 |
| XP_009691969.1 | S-adenosylmethionine synthetase                     | 1 |
| XP_009690728.1 | hypothetical protein                                | 1 |
| XP_009692481.1 | conserved hypothetical protein                      | 1 |
| XP_009691270.1 | uncharacterized protein                             | 1 |
| XP_009692411.1 | 60S ribosomal subunit biogenesis protein            | 1 |
| XP_009690487.1 | uncharacterized protein                             | 1 |
| XP_009692723.1 | signal peptidase                                    | 1 |
| XP_009690096.1 | 60S ribosomal protein L5                            | 1 |
| XP_009692123.1 | conserved hypothetical protein                      | 1 |
| XP_009692520.1 | conserved hypothetical protein                      | 1 |
| XP_009689368.1 | DHHC-containing protein 20                          | 1 |
| XP_009691629.1 | conserved hypothetical protein                      | 1 |
| XP_009690058.1 | serine/threonine protein phosphatase pp-x isozyme 1 | 1 |
| XP_009692013.1 | uncharacterized protein                             | 1 |
| XP_009692078.1 | methionine aminopeptidase                           | 1 |
| XP_009689653.1 | uncharacterized protein                             | 1 |
| XP_009691813.1 | uncharacterized protein                             | 1 |
| XP_009691950.1 | conserved hypothetical protein                      | 1 |
| XP_009689325.1 | conserved hypothetical protein                      | 1 |
| XP_009692173.1 | uncharacterized protein                             | 1 |
| XP_009689617.1 | conserved hypothetical protein                      | 1 |
| XP_009690510.1 | conserved hypothetical protein                      | 1 |
| XP_009692775.1 | conserved hypothetical protein                      | 1 |
| XP_009692140.1 | conserved hypothetical protein                      | 1 |
| XP_009692625.1 | uncharacterized protein                             | 1 |
| XP_009691491.1 | RNA processing factor                               | 1 |
| XP_009690466.1 | purine nucleoside phosphorylase                     | 1 |
| XP_009692245.1 | pyruvate kinase                                     | 1 |
| XP_009692641.1 | conserved hypothetical protein                      | 1 |
| XP_009690362.1 | uncharacterized protein                             | 1 |

|                 |                                             |   |
|-----------------|---------------------------------------------|---|
| XP_009691350.1  | 50S ribosomal protein L3                    | 1 |
| XP_0096889062.1 | conserved hypothetical protein              | 1 |
| XP_009691099.1  | conserved hypothetical protein              | 1 |
| XP_009692379.1  | RNA polymerase common subunit               | 1 |
| XP_009691862.1  | hypothetical protein                        | 1 |
| XP_009691486.1  | hypothetical protein                        | 1 |
| XP_009692128.1  | uncharacterized protein                     | 1 |
| XP_009692405.1  | vacuolar ATP synthase                       | 1 |
| XP_009692811.1  | 50S ribosomal protein L16                   | 1 |
| XP_009692615.1  | acetyl-coenzyme A synthetase                | 1 |
| XP_009690698.1  | conserved hypothetical protein              | 1 |
| XP_009690224.1  | conserved hypothetical protein              | 1 |
| XP_009692240.1  | translation elongation factor 1-alpha       | 1 |
| XP_009690696.1  | citrate synthase%2C mitochondrial precursor | 1 |
| XP_009689428.1  | Dim1 protein                                | 1 |
| XP_009689183.1  | serine hydroxymethyltransferase             | 1 |
| XP_009688944.1  | long-chain-fatty-acid--CoA ligase           | 1 |
| XP_009691655.1  | 50S ribosomal protein L27                   | 1 |
| XP_009692393.1  | uncharacterized protein                     | 1 |
| XP_009689630.1  | uncharacterized protein                     | 1 |
| XP_009691527.1  | conserved hypothetical protein              | 1 |
| XP_009691548.1  | ER lumen protein retaining receptor 1       | 1 |
| XP_009690303.1  | vesicle trafficking protein-like 1          | 1 |
| XP_009690518.1  | uncharacterized protein                     | 1 |
| XP_009689343.1  | choline kinase                              | 1 |
| XP_009692590.1  | hypothetical protein                        | 1 |
| XP_009690441.1  | uncharacterized protein                     | 1 |
| XP_009691957.1  | hypothetical protein                        | 1 |
| XP_009690917.1  | ADP-ribosylation factor                     | 1 |
| XP_009689833.1  | uncharacterized protein                     | 1 |
| XP_009689559.1  | clathrin assembly protein                   | 1 |
| XP_009691613.1  | uncharacterized protein                     | 1 |
| XP_009690764.1  | conserved hypothetical protein              | 1 |
| XP_009690771.1  | ATP-dependent RNA helicase                  | 1 |
| XP_009691445.1  | nucleosome assembly protein                 | 1 |
| XP_009692169.1  | uncharacterized protein                     | 1 |
| XP_009689809.1  | conserved hypothetical protein              | 1 |
| XP_009689534.1  | uncharacterized protein                     | 1 |
| XP_009691190.1  | exon junction complex protein               | 1 |

|                |                                                            |   |
|----------------|------------------------------------------------------------|---|
| XP_009691583.1 | uncharacterized protein                                    | 1 |
| XP_009690513.1 | uncharacterized protein                                    | 1 |
| XP_009689550.1 | clathrin assembly protein                                  | 1 |
| XP_009689173.1 | tRNA (guanine-n-(7))-methyltransferase                     | 1 |
| XP_009690073.1 | conserved hypothetical protein                             | 1 |
| XP_009692626.1 | conserved hypothetical protein                             | 1 |
| XP_009690592.1 | nucleolar protein                                          | 1 |
| XP_009689255.1 | hypothetical protein                                       | 1 |
| XP_009689345.1 | conserved hypothetical protein                             | 1 |
| XP_009689636.1 | 26S proteasome subunit 4                                   | 1 |
| XP_009691652.1 | seryl-tRNA synthetase                                      | 1 |
| XP_009692718.1 | conserved hypothetical protein                             | 1 |
| XP_009691272.1 | conserved hypothetical protein                             | 1 |
| XP_009690278.1 | conserved hypothetical protein                             | 1 |
| XP_009692415.1 | uncharacterized protein                                    | 1 |
| XP_009692776.1 | conserved hypothetical protein                             | 1 |
| XP_009689889.1 | peptidyl-prolyl cis-trans isomerase                        | 1 |
| XP_009689429.1 | conserved hypothetical protein                             | 1 |
| XP_009692374.1 | triosephosphate isomerase                                  | 1 |
| XP_009691183.1 | conserved hypothetical protein                             | 1 |
| XP_009689910.1 | chloroplast ribosomal protein L1/50S ribosomal protein L10 | 1 |
| XP_009689558.1 | conserved hypothetical protein                             | 1 |
| XP_009691251.1 | synaptic glycoprotein sc2                                  | 1 |
| XP_009692672.1 | GNAT-family N-acetyltransferase                            | 1 |
| XP_009692564.1 | eukaryotic translation initiation factor                   | 1 |
| XP_009691275.1 | methionine aminopeptidase                                  | 1 |
| XP_009689994.1 | uncharacterized protein                                    | 1 |
| XP_009691851.1 | 40S ribosomal protein S27                                  | 1 |
| XP_009692295.1 | mitochondrial carrier protein                              | 1 |
| XP_009691865.1 | hypothetical protein                                       | 1 |
| XP_009688991.1 | conserved hypothetical protein                             | 1 |
| XP_009692560.1 | conserved hypothetical protein                             | 1 |
| XP_009692474.1 | methylase                                                  | 1 |
| XP_009692038.1 | microtubule-associated protein                             | 1 |
| XP_009688918.1 | cytochrome C oxidase subunit 2a                            | 1 |
| XP_009692304.1 | uncharacterized protein                                    | 1 |
| XP_009690401.1 | dual-specificity phosphatase                               | 1 |
| XP_009690754.1 | uncharacterized protein                                    | 1 |
| XP_009690838.1 | hypothetical protein                                       | 1 |

|                |                                                                   |   |
|----------------|-------------------------------------------------------------------|---|
| XP_009690910.1 | conserved hypothetical protein                                    | 1 |
| XP_009689204.1 | conserved hypothetical protein                                    | 1 |
| XP_009689185.1 | conserved hypothetical protein                                    | 1 |
| XP_009691674.1 | conserved hypothetical protein                                    | 1 |
| XP_009688853.1 | conserved hypothetical protein                                    | 1 |
| XP_009689045.1 | hypothetical protein                                              | 1 |
| XP_009690821.1 | chromatin assembly protein                                        | 1 |
| XP_009691345.1 | conserved hypothetical protein                                    | 1 |
| XP_009689920.1 | phosphatidylglycerophosphate synthase                             | 1 |
| XP_009689384.1 | uncharacterized protein                                           | 1 |
| XP_009689834.1 | uncharacterized protein                                           | 1 |
| XP_009692666.1 | uncharacterized protein                                           | 1 |
| XP_009691798.1 | uncharacterized protein                                           | 1 |
| XP_009689375.1 | secretory protein                                                 | 1 |
| XP_009691435.1 | conserved hypothetical protein                                    | 1 |
| XP_009692774.1 | uncharacterized protein                                           | 1 |
| XP_009689757.1 | conserved hypothetical protein                                    | 1 |
| XP_009691308.1 | hypothetical protein                                              | 1 |
| XP_009692601.1 | DNA repair protein Rad51                                          | 1 |
| XP_009690059.1 | histone                                                           | 1 |
| XP_009692395.1 | uncharacterized protein                                           | 1 |
| XP_009690350.1 | predicted protein                                                 | 1 |
| XP_009689005.1 | uncharacterized protein                                           | 1 |
| XP_009689652.1 | ubiquinol-cytochrome C reductase complex subunit-like protein     | 1 |
| XP_009689205.1 | conserved hypothetical protein                                    | 1 |
| XP_009692510.1 | 50S ribosomal protein L14                                         | 1 |
| XP_009688927.1 | uncharacterized protein                                           | 1 |
| XP_009690054.1 | protein yippee-like 1                                             | 1 |
| XP_009692419.1 | conserved hypothetical protein                                    | 1 |
| XP_009691198.1 | uncharacterized protein                                           | 1 |
| XP_009690448.1 | conserved hypothetical protein                                    | 1 |
| XP_009691310.1 | ribosome biogenesis protein                                       | 1 |
| XP_009689234.1 | hypothetical protein                                              | 1 |
| XP_009690283.1 | conserved hypothetical protein                                    | 1 |
| XP_009690215.1 | proteasome (prosome%2C macropain) 26S subunit%2C non-ATPase%2C 14 | 1 |
| XP_009689595.1 | pre-mRNA splicing factor                                          | 1 |
| XP_009692764.1 | uncharacterized protein                                           | 1 |
| XP_009689460.1 | molecular chaperone DnaJ                                          | 1 |
| XP_009689967.1 | conserved hypothetical protein                                    | 1 |

|                |                                                   |   |
|----------------|---------------------------------------------------|---|
| XP_009691094.1 | transcription factor                              | 1 |
| XP_009690789.1 | conserved hypothetical protein                    | 1 |
| XP_009689890.1 | ADP-ribosylation factor GTPase activating protein | 1 |
| XP_009690257.1 | heat shock protein                                | 1 |
| XP_009689879.1 | conserved hypothetical protein                    | 1 |
| XP_009689356.1 | conserved hypothetical protein                    | 1 |
| XP_009692577.1 | uncharacterized protein                           | 1 |
| XP_009691173.1 | light induced protein like protein                | 1 |
| XP_009689397.1 | conserved hypothetical protein                    | 1 |
| XP_009691177.1 | conserved hypothetical protein                    | 1 |
| XP_009692565.1 | prenyltransferase                                 | 1 |
| XP_009688976.1 | DNA excision-repair helicase                      | 1 |
| XP_009689451.1 | uncharacterized protein                           | 1 |
| XP_009692338.1 | conserved hypothetical protein                    | 1 |
| XP_009691895.1 | methyltransferase                                 | 1 |
| XP_009689250.1 | conserved hypothetical protein                    | 1 |
| XP_009690171.1 | conserved hypothetical protein                    | 1 |
| XP_009689817.1 | arginyl-tRNA synthetase                           | 1 |
| XP_009688847.1 | uncharacterized protein                           | 1 |
| XP_009692432.1 | conserved hypothetical protein                    | 1 |
| XP_009692592.1 | uncharacterized protein                           | 1 |
| XP_009689671.1 | uncharacterized protein                           | 1 |
| XP_009691406.1 | conserved hypothetical protein                    | 1 |
| XP_009691787.1 | hypothetical protein                              | 1 |
| XP_009689403.1 | trehalose-6-phosphate synthase                    | 1 |
| XP_009691128.1 | conserved hypothetical protein                    | 1 |
| XP_009691729.1 | hypothetical protein                              | 1 |
| XP_009691216.1 | protein kinase                                    | 1 |
| XP_009689716.1 | actin depolymerizing factor                       | 1 |
| XP_009690785.1 | uncharacterized protein                           | 1 |
| XP_009689051.1 | dynein light chain 1                              | 1 |
| XP_009689738.1 | conserved hypothetical protein                    | 1 |
| XP_009692391.1 | conserved hypothetical protein                    | 1 |
| XP_009692142.1 | predicted protein                                 | 1 |
| XP_009689339.1 | conserved hypothetical protein                    | 1 |
| XP_009689839.1 | 60S ribosomal protein L2/L8                       | 1 |
| XP_009692687.1 | hypothetical protein                              | 1 |
| XP_009689608.1 | ADP-ribosylation factor GTPase activating protein | 1 |
| XP_009688931.1 | conserved hypothetical protein                    | 1 |

|                |                                                    |   |
|----------------|----------------------------------------------------|---|
| XP_009690169.1 | conserved hypothetical protein                     | 1 |
| XP_009690842.1 | conserved hypothetical protein                     | 1 |
| XP_009689878.1 | eukaryotic translation initiation factor 3 subunit | 1 |
| XP_009690230.1 | mitochondrial processing peptidase subunit alpha   | 1 |
| XP_009689686.1 | conserved hypothetical protein                     | 1 |
| XP_009688923.1 | heat shock protein 70                              | 1 |
| XP_009690021.1 | hypothetical protein                               | 1 |
| XP_009688950.1 | uncharacterized protein                            | 1 |
| XP_009688966.1 | conserved hypothetical protein                     | 1 |
| XP_009689874.1 | elongation factor 2                                | 1 |
| XP_009690349.1 | ATP-dependent RNA helicase                         | 1 |
| XP_009690577.1 | hypothetical protein                               | 1 |
| XP_009690258.1 | heat shock protein 90                              | 1 |
| XP_009688902.1 | conserved hypothetical protein                     | 1 |
| XP_009691083.1 | uncharacterized protein                            | 1 |
| XP_009690326.1 | topoisomerase-related nucleotidyltransferase       | 1 |
| XP_009690758.1 | uncharacterized protein                            | 1 |
| XP_009691284.1 | conserved hypothetical protein                     | 1 |
| XP_009689241.1 | cytokine induced apoptosis inhibitor 1             | 1 |
| XP_009690061.1 | aspartate aminotransferase%2C cytoplasmic          | 1 |
| XP_009692051.1 | hypothetical protein                               | 1 |
| XP_009690672.1 | uncharacterized protein                            | 1 |
| XP_009689360.1 | conserved hypothetical protein                     | 1 |
| XP_009691033.1 | hypothetical protein                               | 1 |
| XP_009689304.1 | uncharacterized protein                            | 1 |
| XP_009689048.1 | uncharacterized protein                            | 1 |
| XP_009690419.1 | conserved hypothetical protein                     | 1 |
| XP_009690879.1 | ubiquitin carboxyl-terminal hydrolase              | 1 |
| XP_009692669.1 | hypothetical protein                               | 1 |
| XP_009692740.1 | T-complex protein 1 chaperonin                     | 1 |
| XP_009691703.1 | Band 7-related protein                             | 1 |
| XP_009691987.1 | phenylalanyl-tRNA synthetase                       | 1 |
| XP_009691302.1 | conserved hypothetical protein                     | 1 |
| XP_009689611.1 | uncharacterized protein                            | 1 |
| XP_009691158.1 | conserved hypothetical protein                     | 1 |
| XP_009690763.1 | uncharacterized protein                            | 1 |
| XP_009688874.1 | uncharacterized protein                            | 1 |
| XP_009689819.1 | uncharacterized protein                            | 1 |
| XP_009689432.1 | conserved hypothetical protein                     | 1 |

|                |                                                  |   |
|----------------|--------------------------------------------------|---|
| XP_009689609.1 | uncharacterized protein                          | 1 |
| XP_009688925.1 | uncharacterized protein                          | 1 |
| XP_009690812.1 | uncharacterized protein                          | 1 |
| XP_009692407.1 | uncharacterized protein                          | 1 |
| XP_009691025.1 | 40S ribosomal protein S8                         | 1 |
| XP_009690543.1 | predicted protein                                | 1 |
| XP_009689217.1 | conserved hypothetical protein                   | 1 |
| XP_009689267.1 | phosphoenolpyruvate carboxykinase                | 1 |
| XP_009690038.1 | uncharacterized protein                          | 1 |
| XP_009692236.1 | conserved hypothetical protein                   | 1 |
| XP_009691384.1 | conserved hypothetical protein                   | 1 |
| XP_009691115.1 | uncharacterized protein                          | 1 |
| XP_009689160.1 | Map2 kinase                                      | 1 |
| XP_009688981.1 | uncharacterized protein                          | 1 |
| XP_009691104.1 | conserved hypothetical protein                   | 1 |
| XP_009689486.1 | phosphotyrosyl phosphatase activator protein     | 1 |
| XP_009690082.1 | conserved hypothetical protein                   | 1 |
| XP_009690850.1 | hypothetical protein                             | 1 |
| XP_009691358.1 | uncharacterized protein                          | 1 |
| XP_009689838.1 | aconitate hydratase 3%2C mitochondrial precursor | 1 |
| XP_009692330.1 | uncharacterized protein                          | 1 |
| XP_009689269.1 | ribonucleoprotein                                | 1 |
| XP_009692002.1 | RNase L inhibitor protein                        | 1 |
| XP_009688932.1 | uncharacterized protein                          | 1 |
| XP_009692313.1 | conserved hypothetical protein                   | 1 |
| XP_009690955.1 | uncharacterized protein                          | 1 |
| XP_009690244.1 | conserved hypothetical protein                   | 1 |
| XP_009689271.1 | conserved hypothetical protein                   | 1 |
| XP_009689739.1 | polyadenylate-binding protein                    | 1 |
| XP_009691999.1 | uncharacterized protein                          | 1 |
| XP_009689017.1 | hypothetical protein                             | 1 |
| XP_009689093.1 | uncharacterized protein                          | 1 |
| XP_009689430.1 | hypothetical protein                             | 1 |
| XP_009691114.1 | 4-hydroxybenzoate octaprenyltransferase          | 1 |
| XP_009690393.1 | conserved hypothetical protein                   | 1 |
| XP_009690078.1 | uncharacterized protein                          | 1 |
| XP_009690617.1 | conserved hypothetical protein                   | 1 |
| XP_009691469.1 | dehydrodolichyl diphosphate synthase             | 1 |
| XP_009691462.1 | uncharacterized protein                          | 1 |

|                |                                                        |   |
|----------------|--------------------------------------------------------|---|
| XP_009691450.1 | conserved hypothetical protein                         | 1 |
| XP_009691846.1 | 2-C-methyl-D-erythritol 4-phosphate cytidyltransferase | 1 |
| XP_009692221.1 | uncharacterized protein                                | 1 |
| XP_009690382.1 | hydrolase                                              | 1 |
| XP_009689528.1 | cell division control protein 2 homolog                | 1 |
| XP_009690757.1 | major facilitator superfamily MFS-1 protein            | 1 |
| XP_009689925.1 | conserved hypothetical protein                         | 1 |
| XP_009691178.1 | conserved hypothetical protein                         | 1 |
| XP_009690607.1 | conserved hypothetical protein                         | 1 |
| XP_009691407.1 | conserved hypothetical protein                         | 1 |
| XP_009689490.1 | uncharacterized protein                                | 1 |
| XP_009689896.1 | uncharacterized protein                                | 1 |
| XP_009689117.1 | conserved hypothetical protein                         | 1 |
| XP_009690919.1 | DNA primase small subunit                              | 1 |
| XP_009692022.1 | uncharacterized protein                                | 1 |
| XP_009690124.1 | conserved hypothetical protein                         | 1 |
| XP_009692719.1 | uncharacterized protein                                | 1 |
| XP_009689587.1 | actin                                                  | 1 |
| XP_009689464.1 | ubiquitin                                              | 1 |
| XP_009691775.1 | conserved hypothetical protein                         | 1 |
| XP_009688961.1 | chromatin assembly factor 1 protein                    | 1 |
| XP_009692302.1 | uncharacterized protein                                | 1 |
| XP_009691475.1 | conserved hypothetical protein                         | 1 |
| XP_009690925.1 | hypothetical protein                                   | 1 |
| XP_009689259.1 | uncharacterized protein                                | 1 |
| XP_009690533.1 | autophagy-related peptidase                            | 1 |
| XP_009692585.1 | uncharacterized protein                                | 1 |
| XP_009692495.1 | GTPase-activating protein                              | 1 |
| XP_009692106.1 | conserved hypothetical protein                         | 1 |
| XP_009691634.1 | Conserved hypothetical protein                         | 1 |
| XP_009692397.1 | conserved hypothetical protein                         | 1 |
| XP_009691376.1 | major facilitator superfamily MFS-1 protein            | 1 |
| XP_009690549.1 | conserved hypothetical protein                         | 1 |
| XP_009689416.1 | transcription initiation factor                        | 1 |
| XP_009689999.1 | uncharacterized protein                                | 1 |
| XP_009691561.1 | uncharacterized protein                                | 1 |
| XP_009689193.1 | uncharacterized protein                                | 1 |
| XP_009691962.1 | uncharacterized protein                                | 1 |
| XP_009691170.1 | hypothetical protein                                   | 1 |



|                |                                                         |   |
|----------------|---------------------------------------------------------|---|
| XP_009691598.1 | conserved hypothetical protein                          | 1 |
| XP_009692400.1 | uncharacterized protein                                 | 1 |
| XP_009688915.1 | conserved hypothetical protein                          | 1 |
| XP_009690033.1 | hypothetical protein                                    | 1 |
| XP_009692138.1 | uncharacterized protein                                 | 1 |
| XP_009692041.1 | uncharacterized protein                                 | 1 |
| XP_009691766.1 | uncharacterized protein                                 | 1 |
| XP_009690852.1 | conserved hypothetical protein                          | 1 |
| XP_009690309.1 | uncharacterized protein                                 | 1 |
| XP_009688975.1 | hypothetical protein                                    | 1 |
| XP_009690427.1 | uncharacterized protein                                 | 1 |
| XP_009690633.1 | transmembrane protein 17                                | 1 |
| XP_009689385.1 | conserved hypothetical protein                          | 1 |
| XP_009690591.1 | conserved hypothetical protein                          | 1 |
| XP_009691826.1 | conserved hypothetical protein                          | 1 |
| XP_009691127.1 | conserved hypothetical protein                          | 1 |
| XP_009689868.1 | conserved hypothetical protein                          | 1 |
| XP_009689041.1 | uncharacterized protein                                 | 1 |
| XP_009689694.1 | conserved hypothetical protein                          | 1 |
| XP_009692055.1 | splicing component                                      | 1 |
| XP_009692036.1 | conserved hypothetical protein                          | 1 |
| XP_009691515.1 | membrane transporter                                    | 1 |
| XP_009692604.1 | uncharacterized protein                                 | 1 |
| XP_009692546.1 | conserved hypothetical protein                          | 1 |
| XP_009691827.1 | conserved hypothetical protein                          | 1 |
| XP_009692171.1 | uncharacterized protein                                 | 1 |
| XP_009690778.1 | ABC transporter                                         | 1 |
| XP_009691024.1 | conserved hypothetical protein                          | 1 |
| XP_009690481.1 | uncharacterized protein                                 | 1 |
| XP_009692441.1 | uncharacterized protein                                 | 1 |
| XP_009692110.1 | mitochondrial large subunit ribosomal protein           | 1 |
| XP_009689069.1 | uncharacterized protein                                 | 1 |
| XP_009692278.1 | uncharacterized protein                                 | 1 |
| XP_009692032.1 | Plasmodium falciparum CPW-WPC repeat containing protein | 1 |
| XP_009691352.1 | U6 snRNA-associated sm-like protein lsm4                | 1 |
| XP_009692260.1 | mitochondrial carrier protein                           | 1 |
| XP_009692616.1 | importin beta/transportin                               | 1 |
| XP_009688861.1 | molecular chaperone DnaJ                                | 1 |
| XP_009690182.1 | 5'-3' exoribonuclease 2                                 | 1 |

|                |                                               |   |
|----------------|-----------------------------------------------|---|
| XP_009691118.1 | conserved hypothetical protein                | 1 |
| XP_009690188.1 | conserved hypothetical protein                | 1 |
| XP_009692344.1 | conserved hypothetical protein                | 1 |
| XP_009689803.1 | RNA pseudouridylylase synthase                | 1 |
| XP_009691088.1 | cytochrome c oxidase copper chaperone%2C DcpU | 1 |
| XP_009691896.1 | endonuclease                                  | 1 |
| XP_009691304.1 | conserved hypothetical protein                | 1 |
| XP_009689614.1 | uncharacterized protein                       | 1 |
| XP_009690484.1 | uncharacterized protein                       | 1 |
| XP_009690706.1 | membrane skeletal protein IMC1                | 1 |
| XP_009691187.1 | T-complex protein subunit beta                | 1 |
| XP_009689551.1 | conserved hypothetical protein                | 1 |
| XP_009692280.1 | conserved hypothetical protein                | 1 |
| XP_009691774.1 | hypothetical protein                          | 1 |
| XP_009691337.1 | conserved hypothetical protein                | 1 |
| XP_009691508.1 | conserved hypothetical protein                | 1 |
| XP_009691274.1 | uncharacterized protein                       | 1 |
| XP_009689989.1 | RNA-binding protein                           | 1 |
| XP_009692425.1 | tRNA 3' processing endoribonuclease           | 1 |
| XP_009692657.1 | molecular chaperone ClpB                      | 1 |
| XP_009688900.1 | importin subunit beta-1                       | 1 |
| XP_009689865.1 | calmodulin-like domain protein kinase         | 1 |
| XP_009691884.1 | conserved hypothetical protein                | 1 |
| XP_009690418.1 | uncharacterized protein                       | 1 |
| XP_009689333.1 | uncharacterized protein                       | 1 |
| XP_009688912.1 | vesicle transport protein                     | 1 |
| XP_009690743.1 | TatD-like deoxyribonuclease                   | 1 |
| XP_009689216.1 | uncharacterized protein                       | 1 |
| XP_009690900.1 | dolichol phosphate mannose synthase           | 1 |
| XP_009689869.1 | uncharacterized protein                       | 1 |
| XP_009690423.1 | uncharacterized protein                       | 1 |
| XP_009692222.1 | uncharacterized protein                       | 1 |
| XP_009689673.1 | casein kinase II subunit beta                 | 1 |
| XP_009689150.1 | uncharacterized protein                       | 1 |
| XP_009690150.1 | conserved hypothetical protein                | 1 |
| XP_009689404.1 | conserved hypothetical protein                | 1 |
| XP_009689086.1 | MORN motif repeat containing protein          | 1 |
| XP_009692648.1 | conserved hypothetical protein                | 1 |
| XP_009690358.1 | uncharacterized protein                       | 1 |

|                |                                                    |   |
|----------------|----------------------------------------------------|---|
| XP_009689512.1 | uncharacterized protein                            | 1 |
| XP_009691071.1 | uncharacterized protein                            | 1 |
| XP_009690205.1 | uncharacterized protein                            | 1 |
| XP_009689783.1 | thrombospondin%2C type I repeat containing protein | 1 |
| XP_009689049.1 | conserved hypothetical protein                     | 1 |
| XP_009690307.1 | conserved hypothetical protein                     | 1 |
| XP_009691825.1 | uncharacterized protein                            | 1 |
| XP_009689979.1 | lipoate-protein ligase                             | 1 |
| XP_009692396.1 | conserved hypothetical protein                     | 1 |
| XP_009691997.1 | signal recognition particle subunit                | 1 |
| XP_009692709.1 | hypothetical protein                               | 1 |
| XP_009688914.1 | RNA-processing protein                             | 1 |
| XP_009691960.1 | conserved hypothetical protein                     | 1 |
| XP_009692818.1 | conserved hypothetical protein                     | 1 |
| XP_009691314.1 | uncharacterized protein                            | 1 |
| XP_009691911.1 | uncharacterized protein                            | 1 |
| XP_009690575.1 | conserved hypothetical protein                     | 1 |
| XP_009691822.1 | fumarate hydratase class I                         | 1 |
| XP_009691723.1 | hypothetical protein                               | 1 |
| XP_009689165.1 | conserved hypothetical protein                     | 1 |
| XP_009689812.1 | DEAD-box family helicase                           | 1 |
| XP_009690167.1 | hypothetical protein                               | 1 |
| XP_009689186.1 | uncharacterized protein                            | 1 |
| XP_009690044.1 | conserved hypothetical protein                     | 1 |
| XP_009690027.1 | conserved hypothetical protein                     | 1 |
| XP_009689988.1 | uncharacterized protein                            | 1 |
| XP_009692375.1 | conserved hypothetical protein                     | 1 |
| XP_009690589.1 | conserved hypothetical protein                     | 1 |
| XP_009690468.1 | uncharacterized protein                            | 1 |
| XP_009692352.1 | conserved hypothetical protein                     | 1 |
| XP_009692685.1 | conserved hypothetical protein                     | 1 |
| XP_009689982.1 | vesicle transport protein                          | 1 |
| XP_009689656.1 | conserved hypothetical protein                     | 1 |
| XP_009689118.1 | molecular chaperone                                | 1 |
| XP_009692267.1 | mRNA turnover/deadenylation component              | 1 |
| XP_009691169.1 | uncharacterized protein                            | 1 |
| XP_009692361.1 | putative 60S Ribosomal protein L44                 | 1 |
| XP_009691809.1 | uncharacterized protein                            | 1 |
| XP_009689447.1 | uncharacterized protein                            | 1 |

|                |                                                  |   |
|----------------|--------------------------------------------------|---|
| XP_009692693.1 | conserved hypothetical protein                   | 1 |
| XP_009690354.1 | conserved hypothetical protein                   | 1 |
| XP_009692060.1 | GTPase                                           | 1 |
| XP_009689081.1 | conserved hypothetical protein                   | 1 |
| XP_009692809.1 | conserved hypothetical protein                   | 1 |
| XP_009689307.1 | uncharacterized protein                          | 1 |
| XP_009688935.1 | conserved hypothetical protein                   | 1 |
| XP_009692504.1 | uncharacterized protein                          | 1 |
| XP_009689176.1 | deoxyuridine 5'-triphosphate nucleotidohydrolase | 1 |
| XP_009690853.1 | conserved hypothetical protein                   | 1 |
| XP_009692369.1 | lysyl-tRNA synthetase                            | 1 |
| XP_009691080.1 | hypothetical protein                             | 1 |
| XP_009688940.1 | peptidylprolyl isomerase                         | 1 |
| XP_009691533.1 | cysteine proteinase                              | 1 |
| XP_009692294.1 | mitochondrial carrier protein                    | 1 |
| XP_009690679.1 | uncharacterized protein                          | 1 |
| XP_009691712.1 | uncharacterized protein                          | 1 |
| XP_009691252.1 | uncharacterized protein                          | 1 |
| XP_009689034.1 | conserved hypothetical protein                   | 1 |
| XP_009690495.1 | conserved hypothetical protein                   | 1 |
| XP_009690463.1 | uncharacterized protein                          | 1 |
| XP_009692381.1 | uncharacterized protein                          | 1 |
| XP_009691097.1 | conserved hypothetical protein                   | 1 |
| XP_009691154.1 | 60S ribosomal protein L15                        | 1 |
| XP_009691082.1 | uncharacterized protein                          | 1 |
| XP_009689444.1 | conserved hypothetical protein                   | 1 |
| XP_009689014.1 | actin                                            | 1 |
| XP_009688883.1 | DEAD-box family RNA helicase                     | 1 |
| XP_009689600.1 | conserved hypothetical protein                   | 1 |
| XP_009689723.1 | conserved hypothetical protein                   | 1 |
| XP_009690760.1 | vacuolar-protein sorting-associated protein      | 1 |
| XP_009691064.1 | farnesyl pyrophosphate synthetase                | 1 |
| XP_009689887.1 | XPA binding protein 1                            | 1 |
| XP_009689672.1 | protein kinase                                   | 1 |
| XP_009691184.1 | conserved hypothetical protein                   | 1 |
| XP_009692488.1 | conserved hypothetical protein                   | 1 |
| XP_009690856.1 | conserved hypothetical protein                   | 1 |
| XP_009689161.1 | uncharacterized protein                          | 1 |
| XP_009689536.1 | conserved hypothetical protein                   | 1 |

|                |                                                   |   |
|----------------|---------------------------------------------------|---|
| XP_009692320.1 | mannosyltransferase                               | 1 |
| XP_009688871.1 | glucokinase                                       | 1 |
| XP_009689240.1 | glycyl-tRNA synthetase                            | 1 |
| XP_009690937.1 | uncharacterized protein                           | 1 |
| XP_009691899.1 | conserved hypothetical protein                    | 1 |
| XP_009692536.1 | dynamain                                          | 1 |
| XP_009690796.1 | uncharacterized protein                           | 1 |
| XP_009692766.1 | uncharacterized protein                           | 1 |
| XP_009690001.1 | uncharacterized protein                           | 1 |
| XP_009690695.1 | uncharacterized protein                           | 1 |
| XP_009692697.1 | glucose-inhibited division protein a-like protein | 1 |
| XP_009689932.1 | acylphosphatase                                   | 1 |
| XP_009690967.1 | 26S proteasome ATPase subunit                     | 1 |
| XP_009691405.1 | hypothetical protein                              | 1 |
| XP_009691269.1 | cobalamin synthesis protein                       | 1 |
| XP_009689655.1 | protein disulfide isomerase                       | 1 |
| XP_009689801.1 | uncharacterized protein                           | 1 |
| XP_009689126.1 | serine protease                                   | 1 |
| XP_009692024.1 | proteasome component                              | 1 |
| XP_009688947.1 | tRNA wybutosine-synthesizing protein 1 homolog    | 1 |
| XP_009690070.1 | glycylpeptide N-tetradecanoyltransferase 1        | 1 |
| XP_009690525.1 | ATP-dependent RNA helicase                        | 1 |
| XP_009688964.1 | histidyl-tRNA synthetase                          | 1 |
| XP_009688982.1 | seryl-tRNA synthetase                             | 1 |
| XP_009692421.1 | conserved hypothetical protein                    | 1 |
| XP_009689346.1 | transcription elongation factor                   | 1 |
| XP_009690776.1 | initiation factor 4E                              | 1 |
| XP_009689848.1 | CDC5-like                                         | 1 |
| XP_009692086.1 | uncharacterized protein                           | 1 |
| XP_009691267.1 | 60S ribosomal protein L35a                        | 1 |
| XP_009691760.1 | conserved hypothetical protein                    | 1 |
| XP_009691317.1 | conserved hypothetical protein                    | 1 |
| XP_009690319.1 | beta adaptin                                      | 1 |
| XP_009689620.1 | uncharacterized protein                           | 1 |
| XP_009691694.1 | hypothetical protein                              | 1 |
| XP_009692378.1 | vesicle-associated membrane protein               | 1 |
| XP_009690400.1 | Mg protoporphyrin IX chelatase                    | 1 |
| XP_009691408.1 | uncharacterized protein                           | 1 |
| XP_009689141.1 | uncharacterized protein                           | 1 |

|                 |                                                                                                                   |   |
|-----------------|-------------------------------------------------------------------------------------------------------------------|---|
| XP_0096889963.1 | pre-mRNA splicing protein                                                                                         | 1 |
| XP_009690373.1  | ribosomal protein S9/S16                                                                                          | 1 |
| XP_009690359.1  | conserved hypothetical protein                                                                                    | 1 |
| XP_009688911.1  | protein phosphatase 2A regulatory subunit B                                                                       | 1 |
| XP_009691389.1  | uncharacterized protein                                                                                           | 1 |
| XP_009690390.1  | hypothetical protein                                                                                              | 1 |
| XP_009691609.1  | eukaryotic initiation factor                                                                                      | 1 |
| XP_009691244.1  | Ras-related GTPase                                                                                                | 1 |
| XP_009692061.1  | uncharacterized protein                                                                                           | 1 |
| XP_009689387.1  | hypothetical protein                                                                                              | 1 |
| XP_009689841.1  | hypothetical protein                                                                                              | 1 |
| XP_009688903.1  | uncharacterized protein                                                                                           | 1 |
| XP_009692329.1  | elongation factor subunit                                                                                         | 1 |
| XP_009690042.1  | conserved hypothetical protein                                                                                    | 1 |
| XP_009692366.1  | phosphorylase phosphatase                                                                                         | 1 |
| XP_009689020.1  | 60S ribosomal protein L13                                                                                         | 1 |
| XP_009691020.1  | serine/threonine protein phosphatase                                                                              | 1 |
| XP_009691006.1  | conserved hypothetical protein                                                                                    | 1 |
| XP_009690989.1  | formate/nitrate transporter                                                                                       | 1 |
| XP_009690998.1  | phosphoglucosamine mutase                                                                                         | 1 |
| XP_009692355.1  | hypothetical protein                                                                                              | 1 |
| XP_009689647.1  | uncharacterized protein                                                                                           | 1 |
| XP_009690780.1  | hypothetical protein                                                                                              | 1 |
| XP_009692165.1  | PRL1 protein                                                                                                      | 1 |
| XP_009690412.1  | uncharacterized protein                                                                                           | 1 |
| XP_009691778.1  | ADP-ribosylation factor                                                                                           | 1 |
| XP_009690905.1  | CTP:phosphorylcholine cytidyltransferase                                                                          | 1 |
| XP_009692713.1  | uncharacterized protein                                                                                           | 1 |
| XP_009689194.1  | conserved hypothetical protein                                                                                    | 1 |
| XP_009692084.1  | conserved hypothetical protein                                                                                    | 1 |
| XP_009688933.1  | uncharacterized protein                                                                                           | 1 |
| XP_009690043.1  | conserved hypothetical protein                                                                                    | 1 |
| XP_009689309.1  | conserved transmembrane protein                                                                                   | 1 |
| XP_009689902.1  | conserved hypothetical protein                                                                                    | 1 |
| XP_009690071.1  | uncharacterized protein                                                                                           | 1 |
| XP_009690870.1  | hypothetical protein                                                                                              | 1 |
| XP_009690742.1  | conserved hypothetical protein                                                                                    | 1 |
| XP_009689075.1  | dihydrolipoamide succinyltransferase component of 2-oxoglutarate dehydrogenase complex%2C mitochondrial precursor | 1 |
| XP_009690233.1  | hypothetical protein                                                                                              | 1 |

|                |                                                              |   |
|----------------|--------------------------------------------------------------|---|
| XP_009690873.1 | conserved hypothetical protein                               | 1 |
| XP_009692522.1 | uncharacterized protein                                      | 1 |
| XP_009691639.1 | Box C/D snoRNA protein                                       | 1 |
| XP_009690663.1 | splicing factor 3a subunit 2                                 | 1 |
| XP_009689472.1 | 26S proteasome subunit                                       | 1 |
| XP_009689026.1 | uncharacterized protein                                      | 1 |
| XP_009689282.1 | uncharacterized protein                                      | 1 |
| XP_009691706.1 | T-complex protein 1 alpha subunit                            | 1 |
| XP_009691498.1 | conserved hypothetical protein                               | 1 |
| XP_009689233.1 | conserved hypothetical protein                               | 1 |
| XP_009691513.1 | transcription factor IIIb subunit                            | 1 |
| XP_009692617.1 | thioredoxin                                                  | 1 |
| XP_009691416.1 | hypothetical protein                                         | 1 |
| XP_009689091.1 | developmentally regulated GTP-binding protein 1              | 1 |
| XP_009691519.1 | protein translocation complex subunit gamma chain            | 1 |
| XP_009689823.1 | nucleolar phosphoprotein                                     | 1 |
| XP_009690138.1 | uncharacterized protein                                      | 1 |
| XP_009690388.1 | conserved hypothetical protein                               | 1 |
| XP_009690578.1 | hypothetical protein                                         | 1 |
| XP_009689908.1 | uncharacterized protein                                      | 1 |
| XP_009691900.1 | putative RPC10 subunit of RNA polymerases I%2C II%2C and III | 1 |
| XP_009691457.1 | spliceosome-associated protein                               | 1 |
| XP_009690288.1 | uncharacterized protein                                      | 1 |
| XP_009690407.1 | splicing factor 3b subunit 4                                 | 1 |
| XP_009690223.1 | conserved hypothetical protein                               | 1 |
| XP_009691333.1 | uncharacterized protein                                      | 1 |
| XP_009692326.1 | conserved hypothetical protein                               | 1 |
| XP_009688954.1 | conserved hypothetical protein                               | 1 |
| XP_009692323.1 | conserved hypothetical protein                               | 1 |
| XP_009690332.1 | 60S ribosomal protein L27a                                   | 1 |
| XP_009692285.1 | DEAD-box family RNA-dependent helicase                       | 1 |
| XP_009690394.1 | Diphthamide synthesis protein                                | 1 |
| XP_009689124.1 | conserved hypothetical protein                               | 1 |
| XP_009691147.1 | conserved hypothetical protein                               | 1 |
| XP_009690187.1 | N-ethylmaleimide-sensitive factor                            | 1 |
| XP_009689538.1 | conserved hypothetical protein                               | 1 |
| XP_009691658.1 | sulfur metabolism negative regulator                         | 1 |
| XP_009690795.1 | conserved hypothetical protein                               | 1 |
| XP_009692437.1 | uncharacterized protein                                      | 1 |

|                |                                |   |
|----------------|--------------------------------|---|
| XP_009692608.1 | uncharacterized protein        | 1 |
| XP_009691709.1 | conserved hypothetical protein | 1 |
| XP_009689914.1 | conserved hypothetical protein | 1 |

---
