# Supplementary material for: Analysis of Theileria orientalis draft genome sequences reveals potential species-level divergence of the Ikeda, Chitose and Buffeli genotypes
Source: PubMed Central journal article supplement (PMC5921998; doi:10.1186/s12864-018-4701-2), 2018-04-27
Supplement: 12864_2018_4701_MOESM9_ESM.pdf [file 12864_2018_4701_MOESM9_ESM.pdf]

| Sequence   | Chromosome | Start   | End     | Size | Major.parent | Minor.parent |
|------------|------------|---------|---------|------|--------------|--------------|
| Goon Nure  | chr1       | 1451809 | 1454775 | 2966 | Fish Creek   | Shintoku     |
| Fish Creek | chr1       | 2098416 | 2099863 | 1447 | Goon Nure    | Unknown      |
| Fish Creek | chr1       | 1082071 | 1083058 | 987  | Goon Nure    | Shintoku     |
| Fish Creek | chr1       | 41550   | 42295   | 745  | Goon Nure    | Unknown      |
| Goon Nure  | chr1       | 91823   | 92763   | 940  | Fish Creek   | Robertson    |
| Goon Nure  | chr1       | 2156430 | 2157315 | 885  | Fish Creek   | Robertson    |
| Goon Nure  | chr1       | 1838526 | 1840037 | 1511 | Fish Creek   | Robertson    |
| Goon Nure  | chr1       | 714190  | 716230  | 2040 | Fish Creek   | Shintoku     |
| Fish Creek | chr1       | 316373  | 316771  | 398  | Goon Nure    | Unknown      |
| Goon Nure  | chr1       | 1674917 | 1676204 | 1287 | Fish Creek   | Shintoku     |
| Goon Nure  | chr1       | 116061  | 117503  | 1442 | Fish Creek   | Robertson    |
| Fish Creek | chr1       | 2308036 | 2308378 | 342  | Goon Nure    | Robertson    |
| Goon Nure  | chr1       | 1941231 | 1941890 | 659  | Fish Creek   | Robertson    |
| Goon Nure  | chr1       | 205145  | 205574  | 429  | Fish Creek   | Shintoku     |
| Fish Creek | chr1       | 727474  | 727849  | 375  | Goon Nure    | Robertson    |
| Fish Creek | chr1       | 1440991 | 1441148 | 157  | Goon Nure    | Robertson    |
| Fish Creek | chr1       | 2407669 | 2408989 | 1320 | Goon Nure    | Robertson    |
| Fish Creek | chr1       | 215317  | 218922  | 3605 | Goon Nure    | Robertson    |
| Shintoku   | chr1       | 319556  | 323352  | 3796 | Unknown      | Fish Creek   |
| Robertson  | chr1       | 1856634 | 1856688 | 54   | Shintoku     | Goon Nure    |
| Goon Nure  | chr1       | 676806  | 678640  | 1834 | Fish Creek   | Robertson    |
| Goon Nure  | chr1       | 1537796 | 1539566 | 1770 | Fish Creek   | Robertson    |
| Goon Nure  | chr1       | 1686212 | 1686626 | 414  | Fish Creek   | Robertson    |
| Goon Nure  | chr1       | 751621  | 751921  | 300  | Fish Creek   | Robertson    |
| Goon Nure  | chr1       | 2065106 | 2066293 | 1187 | Fish Creek   | Shintoku     |
| Fish Creek | chr1       | 307696  | 307965  | 269  | Goon Nure    | Shintoku     |
| Goon Nure  | chr1       | 2491831 | 2493103 | 1272 | Fish Creek   | Shintoku     |
| Robertson  | chr2       | 1325451 | 1333601 | 8150 | Shintoku     | Goon Nure    |
| Goon Nure  | chr2       | 1672054 | 1673509 | 1455 | Fish Creek   | Robertson    |
| Goon Nure  | chr2       | 479350  | 480339  | 989  | Fish Creek   | Unknown      |
| Goon Nure  | chr2       | 745340  | 745996  | 656  | Fish Creek   | Robertson    |
| Fish Creek | chr2       | 20354   | 23856   | 3502 | Goon Nure    | Unknown      |
| Goon Nure  | chr2       | 1771012 | 1772990 | 1978 | Fish Creek   | Robertson    |
| Shintoku   | chr2       | 1433021 | 1433361 | 340  | Robertson    | Goon Nure    |
| Goon Nure  | chr2       | 1888440 | 1889263 | 823  | Fish Creek   | Robertson    |
| Goon Nure  | chr2       | 1861634 | 1862192 | 558  | Fish Creek   | Robertson    |
| Goon Nure  | chr2       | 1984472 | 1986490 | 2018 | Fish Creek   | Shintoku     |
| Goon Nure  | chr2       | 1477327 | 1479866 | 2539 | Fish Creek   | Robertson    |
| Goon Nure  | chr2       | 962335  | 962791  | 456  | Fish Creek   | Robertson    |
| Goon Nure  | chr2       | 326111  | 327144  | 1033 | Fish Creek   | Robertson    |
| Goon Nure  | chr2       | 1590677 | 1591962 | 1285 | Fish Creek   | Robertson    |
| Goon Nure  | chr2       | 1897168 | 1897490 | 322  | Fish Creek   | Robertson    |
| Fish Creek | chr2       | 1813568 | 1818799 | 5231 | Goon Nure    | Shintoku     |
| Goon Nure  | chr2       | 1294598 | 1296044 | 1446 | Fish Creek   | Shintoku     |
| Fish Creek | chr2       | 1377299 | 1378742 | 1443 | Goon Nure    | Unknown      |
| Goon Nure  | chr2       | 1830804 | 1833029 | 2225 | Fish Creek   | Shintoku     |
| Fish Creek | chr2       | 660356  | 664101  | 3745 | Goon Nure    | Shintoku     |
| Goon Nure  | chr2       | 1433402 | 1434655 | 1253 | Fish Creek   | Robertson    |
| Shintoku   | chr3       | 1564972 | 1565528 | 556  | Robertson    | Unknown      |

|            |      |         |         |       |            |            |
|------------|------|---------|---------|-------|------------|------------|
| Fish Creek | chr3 | 1286048 | 1286546 | 498   | Goon Nure  | Unknown    |
| Goon Nure  | chr3 | 1612476 | 1614894 | 2418  | Fish Creek | Robertson  |
| Goon Nure  | chr3 | 584745  | 585818  | 1073  | Fish Creek | Shintoku   |
| Fish Creek | chr3 | 558983  | 559465  | 482   | Goon Nure  | Unknown    |
| Goon Nure  | chr3 | 786421  | 788910  | 2489  | Fish Creek | Shintoku   |
| Goon Nure  | chr3 | 1546309 | 1547010 | 701   | Fish Creek | Robertson  |
| Goon Nure  | chr3 | 1646511 | 1648568 | 2057  | Fish Creek | Shintoku   |
| Fish Creek | chr3 | 866236  | 867012  | 776   | Goon Nure  | Robertson  |
| Goon Nure  | chr3 | 355452  | 356016  | 564   | Fish Creek | Robertson  |
| Goon Nure  | chr3 | 921574  | 922558  | 984   | Fish Creek | Robertson  |
| Goon Nure  | chr3 | 612092  | 613576  | 1484  | Fish Creek | Shintoku   |
| Goon Nure  | chr3 | 794854  | 800825  | 5971  | Fish Creek | Shintoku   |
| Goon Nure  | chr3 | 1532485 | 1538326 | 5841  | Fish Creek | Robertson  |
| Goon Nure  | chr3 | 1911780 | 1913432 | 1652  | Fish Creek | Robertson  |
| Shintoku   | chr3 | 204954  | 204984  | 30    | Robertson  | Unknown    |
| Shintoku   | chr3 | 1068475 | 1072242 | 3767  | Unknown    | Fish Creek |
| Goon Nure  | chr4 | 173747  | 174012  | 265   | Fish Creek | Unknown    |
| Goon Nure  | chr4 | 1514482 | 1515110 | 628   | Fish Creek | Shintoku   |
| Goon Nure  | chr4 | 498676  | 499378  | 702   | Fish Creek | Robertson  |
| Goon Nure  | chr4 | 1661061 | 1661948 | 887   | Fish Creek | Shintoku   |
| Goon Nure  | chr4 | 1001978 | 1002892 | 914   | Fish Creek | Shintoku   |
| Goon Nure  | chr4 | 42779   | 56600   | 13821 | Fish Creek | Robertson  |
| Fish Creek | chr4 | 427485  | 428125  | 640   | Goon Nure  | Unknown    |
| Goon Nure  | chr4 | 829434  | 830967  | 1533  | Fish Creek | Robertson  |
| Fish Creek | chr4 | 1238780 | 1239234 | 454   | Goon Nure  | Robertson  |
| Fish Creek | chr4 | 345420  | 346221  | 801   | Goon Nure  | Robertson  |
| Goon Nure  | chr4 | 974201  | 975790  | 1589  | Fish Creek | Robertson  |
| Goon Nure  | chr4 | 1561764 | 1562180 | 416   | Fish Creek | Shintoku   |
| Goon Nure  | chr4 | 141542  | 142525  | 983   | Fish Creek | Shintoku   |
| Goon Nure  | chr4 | 439828  | 442363  | 2535  | Fish Creek | Shintoku   |
| Fish Creek | chr4 | 5245    | 8483    | 3238  | Goon Nure  | Robertson  |
| Goon Nure  | chr4 | 1432823 | 1433429 | 606   | Fish Creek | Shintoku   |
| Fish Creek | chr4 | 1193984 | 1194108 | 124   | Goon Nure  | Robertson  |
| Fish Creek | chr4 | 471996  | 472894  | 898   | Goon Nure  | Shintoku   |

---
