# Supplementary material for: Analysis of Theileria orientalis draft genome sequences reveals potential species-level divergence of the Ikeda, Chitose and Buffeli genotypes
Source: PubMed Central journal article supplement (PMC5921998; doi:10.1186/s12864-018-4701-2), 2018-04-27
Supplement: 12864_2018_4701_MOESM10_ESM.pdf [file 12864_2018_4701_MOESM10_ESM.pdf]

| protein_id     | Chitose_ka | Chitose_ks | Chitose_kaks | Buffeli_ka | Buffeli_ks | Buffeli_kaks | mean_kaks | function                                     |
|----------------|------------|------------|--------------|------------|------------|--------------|-----------|----------------------------------------------|
| XP_009688834.1 |            |            |              | NA         | NA         | NA           | NA        | conserved hypothetical protein               |
| XP_009688837.1 | 0.0310876  | 0.278964   | 0.11144      | 0.0457958  | 0.458896   | 0.0997956    | 0.105618  | conserved hypothetical protein               |
| XP_009688840.1 | 0.0340762  | 0.304461   | 0.111923     |            |            |              | 0.111923  | ABC transporter                              |
| XP_009688841.1 | 0.106194   | 0.401843   | 0.264267     | 0.0722702  | 0.290093   | 0.249128     | 0.256697  | conserved hypothetical protein               |
| XP_009688842.1 | 0.056748   | 0.314502   | 0.180438     | 0.0246136  | 0.288844   | 0.0852143    | 0.132826  | protein kinase C inhibitor                   |
| XP_009688843.1 | 0.0136872  | 0.47378    | 0.0288894    | 0.00725252 | 0.363064   | 0.0199759    | 0.024433  | exosome complex exonuclease                  |
| XP_009688844.1 | 0.0217719  | 0.349641   | 0.0622694    | 0.0222697  | 0.427824   | 0.0520533    | 0.057161  | uncharacterized protein                      |
| XP_009688845.1 | 0.0387495  | 0.530712   | 0.0730142    | 0.0416433  | 0.576754   | 0.0722029    | 0.072609  | uncharacterized protein                      |
| XP_009688846.1 | 0.0101654  | 0.6159     | 0.0165049    | 0.0131432  | 0.601815   | 0.0218393    | 0.019172  | sortilin                                     |
| XP_009688847.1 | 0.0329515  | 0.352508   | 0.0934773    | 0.0193105  | 0.367486   | 0.0525476    | 0.073012  | uncharacterized protein                      |
| XP_009688848.1 | 0.0189937  | 0.239981   | 0.0791467    | 0.0177178  | 0.139542   | 0.126972     | 0.103059  | uncharacterized protein                      |
| XP_009688849.1 | 0.0230915  | 0.48847    | 0.0472731    | 0.0127578  | 0.451549   | 0.0282535    | 0.037763  | conserved hypothetical protein               |
| XP_009688850.1 | 0.0783345  | 0.687547   | 0.113933     | 0.0684085  | 0.607615   | 0.112585     | 0.113259  | conserved hypothetical protein               |
| XP_009688851.1 | 0.0494115  | 0.837348   | 0.0590096    | 0.0541606  | 0.960162   | 0.0564077    | 0.057709  | cysteine desulfurase                         |
| XP_009688852.1 | 0.0626902  | 0.477327   | 0.131336     | 0.0583182  | 0.506189   | 0.11521      | 0.123273  | uncharacterized protein                      |
| XP_009688853.1 | 0.129551   | 0.467954   | 0.276846     | 0.111737   | 0.393349   | 0.284065     | 0.280455  | conserved hypothetical protein               |
| XP_009688854.1 | 0.0406743  | 0.790417   | 0.0514593    | 0.0574665  | 1.67464    | 0.0343157    | 0.042887  | conserved hypothetical protein               |
| XP_009688855.1 | 0.0259317  | 0.445566   | 0.0581994    | 0.0329958  | 0.403561   | 0.0817615    | 0.06998   | uncharacterized protein                      |
| XP_009688856.1 | 0.0112306  | 0.479721   | 0.0234108    | 0.0119812  | 0.456429   | 0.0262499    | 0.02483   | DNA-directed RNA polymerase II               |
| XP_009688857.1 | 0.0536089  | 0.44808    | 0.0536089    | 0.119641   | 0.0271315  | 0.513331     | 0.0528538 | alkylated DNA repair protein                 |
| XP_009688858.1 | 0.0351281  | 0.874634   | 0.0401632    | 0.0357038  | 1.10487    | 0.032315     | 0.036239  | aspartyl/glutamyl-tRNA amido transferase     |
| XP_009688859.1 | 0.153251   | 0.516643   | 0.296629     | 0.189632   | 0.679226   | 0.279188     | 0.287909  | conserved hypothetical protein               |
| XP_009688860.1 | 0.114608   | 0.623239   | 0.183891     | 0.116518   | 0.570758   | 0.204147     | 0.194019  | conserved hypothetical protein               |
| XP_009688861.1 | 0.0361204  | 0.470733   | 0.0767322    | 0.0412804  | 0.564063   | 0.073184     | 0.074958  | molecular chaperone DnaI                     |
| XP_009688862.1 | 0.0690884  | 0.437872   | 0.157782     | 0.0540272  | 0.352899   | 0.153095     | 0.155439  | conserved hypothetical protein               |
| XP_009688863.1 | 0.0566892  | 0.340405   | 0.166534     | 0.045067   | 0.328192   | 0.137319     | 0.151926  | polyadenylate polymerase                     |
| XP_009688864.1 | 0.141896   | 0.4667     | 0.304041     | 0.134513   | 0.45738    | 0.294094     | 0.299068  | conserved hypothetical protein               |
| XP_009688865.1 | 0.00594987 | 0.55747    | 0.010673     | 0.00556416 | 0.445562   | 0.012488     | 0.011581  | U5 small nucleolar ribonucleoprotein         |
| XP_009688866.1 | 0.0410959  | 0.290059   | 0.141681     | 0.0287822  | 0.316556   | 0.0909227    | 0.116302  | conserved hypothetical protein               |
| XP_009688867.1 | 0.0273192  | 0.447454   | 0.0610546    | 0.0323484  | 0.576018   | 0.0561586    | 0.058607  | ribonuclease                                 |
| XP_009688868.1 | 0.0744829  | 0.613432   | 0.12142      | 0.0597005  | 0.580673   | 0.102813     | 0.112117  | conserved hypothetical protein               |
| XP_009688873.1 | 0.0275627  | 0.425916   | 0.064714     | 0.0170015  | 0.552083   | 0.0307952    | 0.047755  | hexokinase 1                                 |
| XP_009688874.1 | 0.084219   | 0.283504   | 0.297064     | 0.0239186  | 0.298059   | 0.0802478    | 0.188656  | uncharacterized protein                      |
| XP_009688875.1 | 0.113167   | 0.322941   | 0.350426     | 0.122565   | 0.306177   | 0.400308     | 0.375367  | conserved hypothetical protein               |
| XP_009688876.1 | 0.0648791  | 0.374056   | 0.173447     | 0.0561653  | 0.434244   | 0.129341     | 0.151394  | conserved hypothetical protein               |
| XP_009688877.1 | 0.0268998  | 0.546322   | 0.0492379    | 0.0311625  | 0.470243   | 0.0662688    | 0.057753  | uncharacterized protein                      |
| XP_009688878.1 | 0.0366649  | 0.509908   | 0.0719049    | 0.0289544  | 0.50246    | 0.0576252    | 0.064765  | conserved hypothetical protein               |
| XP_009688879.1 | 0.0410386  | 0.395236   | 0.103833     | 0.0567628  | 0.435385   | 0.130374     | 0.117103  | conserved hypothetical protein               |
| XP_009688880.1 | 0.0697737  | 0.577296   | 0.120863     | 0.0661339  | 0.629316   | 0.105089     | 0.112976  | uncharacterized protein                      |
| XP_009688881.1 | 0.0277501  | 0.515803   | 0.0537998    | 0.0266165  | 0.628464   | 0.0423516    | 0.048076  | uncharacterized protein                      |
| XP_009688882.1 | 0.0402059  | 0.403552   | 0.09963      | 0.0461565  | 0.321265   | 0.143671     | 0.12165   | GTPase                                       |
| XP_009688883.1 | 0.0370876  | 0.527477   | 0.0703112    | 0.0266167  | 0.485817   | 0.0547875    | 0.062549  | DEAD-box family RNA helicase                 |
| XP_009688884.1 | 0.113087   | 0.474629   | 0.238264     | 0.0839756  | 0.40461    | 0.207547     | 0.222906  | conserved hypothetical protein               |
| XP_009688885.1 | 0.0518566  | 0.304487   | 0.170308     | 0.0565249  | 0.204619   | 0.276245     | 0.223276  | uncharacterized protein                      |
| XP_009688886.1 | 0.0472784  | 0.440489   | 0.107332     | 0.0404908  | 0.741575   | 0.0546011    | 0.080967  | conserved hypothetical protein               |
| XP_009688887.1 | 0.0442921  | 0.610213   | 0.0725847    | 0.0427738  | 0.669482   | 0.0638908    | 0.068238  | uncharacterized protein                      |
| XP_009688888.1 | 0.0209458  | 0.508824   | 0.0411652    | 0.0144522  | 0.334127   | 0.0432535    | 0.042209  | conserved hypothetical protein               |
| XP_009688889.1 | 0.068367   | 0.42069    | 0.162512     | 0.0480705  | 0.328275   | 0.146434     | 0.154473  | NifU-like protein 2%2C chloroplast precursor |
| XP_009688890.1 | 0.0314178  | 0.231512   | 0.135707     |            |            |              | 0.135707  | conserved hypothetical protein               |
| XP_009688891.1 | 0.0712804  | 0.376426   | 0.189361     | 0.0506788  | 0.396883   | 0.127692     | 0.158527  | conserved hypothetical protein               |
| XP_009688892.1 | 0.0288397  | 0.879943   | 0.0327745    | 0.0174233  | 0.880304   | 0.0197923    | 0.026283  | protein phosphatase 2c                       |
| XP_009688893.1 | 0.0695883  | 1.47706    | 0.0471128    | 0.0605767  | 1.72847    | 0.0350464    | 0.04108   | conserved hypothetical protein               |
| XP_009688894.1 | 0.0230148  | 0.26645    | 0.0863757    |            |            |              | 0.0863757 | 50S ribosomal protein L33                    |

| protein_id     | Chitose_ka | Chitose_ks | Chitose_kaks | Buffeli_ka  | Buffeli_ks | Buffeli_kaks | mean_kaks | function                                       |
|----------------|------------|------------|--------------|-------------|------------|--------------|-----------|------------------------------------------------|
| XP_009688895.1 | 0.0126359  | 0.354604   | 0.035634     | NA          | NA         | NA           | NA        | acyl-CoA-binding protein                       |
| XP_009688896.1 | 0.196793   | 0.392211   | 0.501754     | 0.204284    | 0.358095   | 0.570475     | 0.536115  | conserved hypothetical protein                 |
| XP_009688898.1 | 0.0472803  | 0.479451   | 0.0986136    | 0.0550233   | 0.476125   | 0.115565     | 0.107089  | uncharacterized protein                        |
| XP_009688899.1 | 0.0290378  | 0.494859   | 0.058679     | 3.18349E-05 | 0.0318349  | 0.001        | 0.02984   | conserved hypothetical protein                 |
| XP_009688900.1 | 0.0956622  | 0.634886   | 0.150676     | 0.137649    | 0.801586   | 0.171721     | 0.161199  | importin subunit beta-1                        |
| XP_009688901.1 | 0.114928   | 0.407837   | 0.281799     | 0.142311    | 0.433158   | 0.328543     | 0.305171  | orotate phosphoribosyltransferase              |
| XP_009688902.1 | 0.0851099  | 0.379505   | 0.224265     | 0.0735462   | 0.342894   | 0.214486     | 0.219376  | conserved hypothetical protein                 |
| XP_009688903.1 | 0.0113234  | 0.316106   | 0.0358215    | 0.00433321  | 0.296594   | 0.0146099    | 0.025216  | uncharacterized protein                        |
| XP_009688904.1 | 0.0533125  | 0.537823   | 0.0991266    | 0.0549394   | 0.528106   | 0.104031     | 0.101579  | methyltransferase                              |
| XP_009688905.1 | 0.0742231  | 0.523154   | 0.141876     | 0.0638463   | 0.53151    | 0.120123     | 0.130999  | conserved hypothetical protein                 |
| XP_009688906.1 | 0.0832151  | 0.696526   | 0.119472     | 0.0817298   | 0.687032   | 0.118961     | 0.119217  | uncharacterized protein                        |
| XP_009688908.1 | 0.0151971  | 0.422149   | 0.0359995    |             |            |              | 0.0359995 | conserved hypothetical protein                 |
| XP_009688909.1 | 0.0214164  | 0.314941   | 0.0680015    | 0.0296288   | 0.417116   | 0.0710324    | 0.069517  | conserved hypothetical protein                 |
| XP_009688910.1 | 0.0827771  | 0.301892   | 0.274194     | 0.106805    | 0.270274   | 0.395172     | 0.334683  | conserved hypothetical protein                 |
| XP_009688911.1 | 0.0435849  | 0.692865   | 0.0629054    | 0.0389611   | 0.677491   | 0.0575079    | 0.060207  | protein phosphatase 2A regulatory subunit B    |
| XP_009688912.1 | 0.0266546  | 0.417184   | 0.0638917    | 0.0305279   | 0.56966    | 0.0535898    | 0.058741  | vesicle transport protein                      |
| XP_009688913.1 | 0.0105457  | 0.31339    | 0.0336505    | 0.0121481   | 0.383526   | 0.0316748    | 0.032663  | CUG-BP- and ETR-3-like factor 1                |
| XP_009688914.1 | 0.0214717  | 0.644547   | 0.0333128    | 0.0199651   | 0.586797   | 0.0340239    | 0.033668  | RNA-processing protein                         |
| XP_009688915.1 | 0.0362578  | 0.59384    | 0.0610565    | 0.0319886   | 0.565353   | 0.0565817    | 0.058819  | conserved hypothetical protein                 |
| XP_009688916.1 | 0.0639763  | 0.446978   | 0.143131     | 0.0657793   | 0.445802   | 0.147553     | 0.145342  | uncharacterized protein                        |
| XP_009688917.1 | 0.0458228  | 0.555627   | 0.0824704    | 0.0321421   | 0.563687   | 0.0570211    | 0.069746  | uncharacterized protein                        |
| XP_009688918.1 | 0.0624131  | 0.348987   | 0.178841     | 0.0512211   | 0.419451   | 0.122115     | 0.150478  | cytochrome C oxidase subunit 2a                |
| XP_009688919.1 | 0.0438817  | 0.257442   | 0.170453     | 0.140463    | 0.413753   | 0.339485     | 0.254969  | uncharacterized protein                        |
| XP_009688920.1 | 0.107194   | 0.40804    | 0.262705     | 0.133568    | 0.43227    | 0.308991     | 0.285848  | conserved hypothetical protein                 |
| XP_009688921.1 | 0.0560547  | 0.352065   | 0.159217     | 0.0426713   | 0.338159   | 0.126187     | 0.142702  | conserved hypothetical protein                 |
| XP_009688922.1 | 0.0106779  | 0.264633   | 0.0403499    | 0.00470766  | 0.127146   | 0.0370256    | 0.038688  | conserved hypothetical protein                 |
| XP_009688923.1 | 0.0856073  | 0.605429   | 0.1414       | 0.0987574   | 0.638845   | 0.154587     | 0.147994  | heat shock protein 70                          |
| XP_009688924.1 | 0.0213606  | 0.547652   | 0.0390039    | 0.0251303   | 0.424131   | 0.0592513    | 0.049128  | protein transport protein sec24-like           |
| XP_009688925.1 | 0.0961394  | 0.672414   | 0.142976     | 0.080878    | 0.657372   | 0.123032     | 0.133004  | uncharacterized protein                        |
| XP_009688926.1 | 0.0277664  | 0.419274   | 0.066225     | 0.0500091   | 0.634196   | 0.0788543    | 0.07254   | fructose-bisphosphate aldolase 2               |
| XP_009688927.1 | 0.0231769  | 0.179149   | 0.129372     | 0.00836062  | 0.254813   | 0.0328108    | 0.081091  | uncharacterized protein                        |
| XP_009688928.1 | 0.0420025  | 0.679247   | 0.0618368    | 0.0306744   | 0.599962   | 0.0511272    | 0.056482  | uncharacterized protein                        |
| XP_009688929.1 | 0.0440342  | 0.348093   | 0.126502     | 0.0431246   | 0.122145   | 0.353062     | 0.239782  | cytochrome C oxidase assembly protein-like     |
| XP_009688930.1 | 0.0189746  | 0.476534   | 0.0398179    |             |            |              | 0.0398179 | conserved hypothetical protein                 |
| XP_009688931.1 | 0.114954   | 0.352092   | 0.326488     | 0.0401173   | 0.11882    | 0.337632     | 0.33206   | conserved hypothetical protein                 |
| XP_009688932.1 | 0.0309905  | 0.522326   | 0.0593317    | 0.0450225   | 0.666172   | 0.0675839    | 0.063458  | uncharacterized protein                        |
| XP_009688933.1 | 0.0290366  | 0.273753   | 0.106068     |             |            |              | 0.106068  | uncharacterized protein                        |
| XP_009688934.1 | 0.00617033 | 0.316731   | 0.0194813    | 0.000343409 | 0.343409   | 0.001        | 0.010241  | conserved hypothetical protein                 |
| XP_009688935.1 | 0.0483023  | 0.253006   | 0.190914     |             |            |              | 0.190914  | conserved hypothetical protein                 |
| XP_009688936.1 | 0.0552948  | 0.880304   | 0.0628133    | 0.0486127   | 0.972722   | 0.0499759    | 0.056395  | uncharacterized protein                        |
| XP_009688937.1 | 0.0676085  | 0.471815   | 0.143295     | 0.0607869   | 0.331095   | 0.183593     | 0.163444  | uncharacterized protein                        |
| XP_009688938.1 | 0.11332    | 0.596553   | 0.189958     | 0.102628    | 0.805166   | 0.127461     | 0.15871   | conserved hypothetical protein                 |
| XP_009688939.1 | 0.0345633  | 0.310853   | 0.111189     | 0.0298282   | 0.258303   | 0.115478     | 0.113334  | S-adenosyl-methyltransferase                   |
| XP_009688940.1 | 0.0380194  | 0.695314   | 0.0546795    | 0.0344703   | 0.444544   | 0.0775407    | 0.066611  | peptidylprolyl isomerase                       |
| XP_009688941.1 | 0.0658719  | 0.449693   | 0.146482     | 0.0449977   | 0.371292   | 0.121192     | 0.133837  | uncharacterized protein                        |
| XP_009688942.1 | 0.0745967  | 0.517619   | 0.144115     | 0.0628827   | 0.46732    | 0.13456      | 0.139338  | predicted protein                              |
| XP_009688943.1 | 0.0840344  | 0.240139   | 0.34994      | 0.10032     | 0.252895   | 0.396686     | 0.373313  | glycosyl transferase%2C family 4 protein       |
| XP_009688944.1 | 0.0335752  | 0.565967   | 0.0593236    | 0.042425    | 0.535699   | 0.0791957    | 0.069926  | long-chain-fatty-acid--CoA ligase              |
| XP_009688945.1 | 0.0548353  | 0.464948   | 0.117939     | 0.0590861   | 0.476567   | 0.123983     | 0.120961  | uncharacterized protein                        |
| XP_009688946.1 | 0.049029   | 0.426594   | 0.114931     | 0.0347631   | 0.317268   | 0.10957      | 0.112251  | conserved hypothetical protein                 |
| XP_009688947.1 | 0.0487605  | 0.345253   | 0.141231     | 0.0270402   | 0.29699    | 0.0910476    | 0.116139  | tRNA wybutosine-synthesizing protein 1 homolog |
| XP_009688948.1 | 0.0258218  | 0.463856   | 0.0556676    | 0.0267864   | 0.430963   | 0.0621549    | 0.058911  | DNA-directed RNA polymerase subunit alpha      |
| XP_009688949.1 | 0.0573921  | 0.802319   | 0.0715327    | 0.0574469   | 0.847815   | 0.0677587    | 0.069646  | ubiquitin-activating enzyme E1                 |

| protein_id     | Chitose_ka | Chitose_ks | Chitose_kaks | Buffeli_ka  | Buffeli_ks | Buffeli_kaks | mean_kaks | function                                            |
|----------------|------------|------------|--------------|-------------|------------|--------------|-----------|-----------------------------------------------------|
| XP_009688950.1 | 0.051287   | 0.797159   | 0.0643372    | 0.0422283   | 0.809149   | 0.0521886    | 0.058263  | uncharacterized protein                             |
| XP_009688951.1 | 0.0276319  | 0.415314   | 0.0665324    | 0.0308714   | 0.544373   | 0.0567101    | 0.061621  | protein disulfide isomerase precursor               |
| XP_009688952.1 | 0.0493287  | 0.611907   | 0.0806147    | 0.0486554   | 0.645435   | 0.0753839    | 0.077999  | conserved hypothetical protein                      |
| XP_009688953.1 | 0.0391247  | 0.494609   | 0.0791022    | 0.0395147   | 0.50041    | 0.0789646    | 0.079033  | conserved hypothetical protein                      |
| XP_009688954.1 | 0.0603731  | 0.423295   | 0.142627     | 0.0551882   | 0.328505   | 0.167998     | 0.155313  | conserved hypothetical protein                      |
| XP_009688955.1 | 0.0237153  | 0.379024   | 0.0625693    | 0.0360968   | 0.427926   | 0.084353     | 0.073461  | conserved hypothetical protein                      |
| XP_009688956.1 | 0.0292279  | 0.43929    | 0.0665343    | 0.0267236   | 0.535825   | 0.0498738    | 0.058204  | GTPase-activating protein                           |
| XP_009688957.1 | 0.0305079  | 0.629351   | 0.0484751    | 0.0256677   | 0.532204   | 0.048229     | 0.048352  | conserved hypothetical protein                      |
| XP_009688958.1 | 0.00996587 | 0.30027    | 0.0331897    | 0.000309369 | 0.309369   | 0.001        | 0.017095  | uncharacterized protein                             |
| XP_009688959.1 | 0.0774     | 0.410266   | 0.188658     | 0.0536789   | 0.442047   | 0.121433     | 0.155046  | uncharacterized protein                             |
| XP_009688960.1 | 0.0816765  | 0.674609   | 0.121072     | 0.0867836   | 0.646321   | 0.134273     | 0.127672  | uncharacterized protein                             |
| XP_009688961.1 | 0.0279632  | 0.412924   | 0.0677198    | 0.0228616   | 0.361589   | 0.0632252    | 0.065472  | chromatin assembly factor 1 protein                 |
| XP_009688962.1 | 0.104608   | 0.381706   | 0.274053     | 0.107268    | 0.349168   | 0.30721      | 0.290631  | conserved hypothetical protein                      |
| XP_009688963.1 | 0.0675509  | 0.361537   | 0.186844     | 0.0829344   | 0.429952   | 0.192892     | 0.189868  | conserved hypothetical protein                      |
| XP_009688964.1 | 0.0489806  | 0.38807    | 0.126216     | 0.0500802   | 0.436502   | 0.114731     | 0.120473  | histidyl-tRNA synthetase                            |
| XP_009688965.1 | 0.0408446  | 0.445999   | 0.0915801    | 0.0252951   | 0.410495   | 0.061621     | 0.076601  | ATP-dependent RNA helicase                          |
| XP_009688966.1 | 0.0600244  | 0.372163   | 0.161285     | 0.066877    | 0.319699   | 0.209188     | 0.185237  | conserved hypothetical protein                      |
| XP_009688967.1 | 0.044053   | 0.491647   | 0.0896029    | 0.0320252   | 0.400285   | 0.080006     | 0.084804  | serine-threonine protein kinase                     |
| XP_009688968.1 | 0.0574619  | 0.385029   | 0.14924      | 0.0314873   | 0.260244   | 0.120992     | 0.135116  | conserved hypothetical protein                      |
| XP_009688969.1 | 0.113108   | 0.438972   | 0.257665     | 0.103426    | 0.558164   | 0.185296     | 0.22148   | conserved hypothetical protein                      |
| XP_009688970.1 | 0.11248    | 0.308252   | 0.364895     |             |            |              | 0.364895  | conserved hypothetical protein                      |
| XP_009688971.1 | 0.0208119  | 0.431661   | 0.0482136    | 0.00914296  | 0.311212   | 0.0293786    | 0.038796  | mitochondrial processing peptidase                  |
| XP_009688972.1 | 0.130331   | 0.491347   | 0.265253     | 0.143314    | 0.625564   | 0.229096     | 0.247175  | uncharacterized protein                             |
| XP_009688973.1 | 0.059714   | 0.476925   | 0.125206     | 0.0319131   | 0.343289   | 0.0929628    | 0.109084  | uncharacterized protein                             |
| XP_009688974.1 | 0.0374996  | 0.497501   | 0.075376     | 0.0407013   | 0.50161    | 0.0811413    | 0.078259  | conserved hypothetical protein                      |
| XP_009688975.1 |            |            |              | 0.128422    | 0.428047   | 0.300019     | 0.300019  | hypothetical protein                                |
| XP_009688976.1 | 0.0185598  | 0.514068   | 0.0361038    | 0.0123851   | 0.391674   | 0.0316209    | 0.033862  | DNA excision-repair helicase                        |
| XP_009688977.1 | 0.0380485  | 0.354775   | 0.107247     | 0.00917775  | 0.174107   | 0.0527134    | 0.07998   | ubiquitin regulatory protein                        |
| XP_009688978.1 | 0.146661   | 0.608053   | 0.241198     | 0.122713    | 0.651022   | 0.188493     | 0.214845  | membrane occupation and recognition nexus protein 1 |
| XP_009688979.1 | 0.0110478  | 0.381972   | 0.028923     | 0.0141838   | 0.44249    | 0.0320545    | 0.030489  | membrane occupation and recognition nexus protein 1 |
| XP_009688980.1 | 0.11689    | 0.294964   | 0.396285     | 0.157538    | 0.220898   | 0.713171     | 0.554728  | conserved hypothetical protein                      |
| XP_009688981.1 | 0.0707088  | 0.434235   | 0.162835     | 0.0741712   | 0.3317     | 0.223609     | 0.193222  | uncharacterized protein                             |
| XP_009688982.1 | 0.0595279  | 0.491201   | 0.121188     | 0.0483936   | 0.384936   | 0.125719     | 0.123453  | seryl-tRNA synthetase                               |
| XP_009688983.1 | 0.0528808  | 0.436506   | 0.121146     | 0.037975    | 0.204105   | 0.186056     | 0.153601  | signal recognition particle                         |
| XP_009688984.1 | 0.0447116  | 0.383244   | 0.116666     | 0.0605293   | 0.343101   | 0.176418     | 0.146542  | uncharacterized protein                             |
| XP_009688985.1 | 0.0788188  | 0.441223   | 0.178637     | 0.069077    | 0.347731   | 0.198651     | 0.188644  | conserved hypothetical protein                      |
| XP_009688986.1 | 0.0247724  | 0.587002   | 0.0422016    | 0.0304125   | 0.38263    | 0.0794828    | 0.060842  | prolyl-tRNA synthetase                              |
| XP_009688987.1 | 0.0620367  | 0.409288   | 0.151572     | 0.0633311   | 0.255671   | 0.247705     | 0.199638  | uncharacterized protein                             |
| XP_009688988.1 | 0.018982   | 0.560174   | 0.0338859    | 0.00744189  | 0.228182   | 0.0326138    | 0.03325   | conserved hypothetical protein                      |
| XP_009688989.1 | 0.0723969  | 0.577838   | 0.125289     | 0.0719225   | 0.586131   | 0.122707     | 0.123998  | conserved hypothetical protein                      |
| XP_009688990.1 | 0.124159   | 0.00248318 | 50           | 0.154       | 0.00308    | 50           | 50        | hypothetical protein                                |
| XP_009688992.1 | 0.0638266  | 0.321647   | 0.198437     | 0.0680067   | 0.298512   | 0.227819     | 0.213128  | uncharacterized protein                             |
| XP_009688993.1 | 0.0449818  | 0.30642    | 0.146798     | 0.0376889   | 0.254377   | 0.148162     | 0.14748   | conserved hypothetical protein                      |
| XP_009688994.1 | 0.00357121 | 0.368321   | 0.00969592   | 0.0132619   | 0.296387   | 0.0447451    | 0.027221  | adrenodoxin-like ferredoxin                         |
| XP_009688995.1 | 0.0219719  | 0.301745   | 0.0728161    | 6.00347E-05 | 0.0600347  | 0.001        | 0.036908  | conserved hypothetical protein                      |
| XP_009688996.1 | 0.00420804 | 0.168432   | 0.0249836    | 0.000139467 | 0.139467   | 0.001        | 0.012992  | conserved hypothetical protein                      |
| XP_009688997.1 | 0.0323796  | 0.507955   | 0.063745     | 0.0326364   | 0.523268   | 0.0623704    | 0.063058  | 2-cys peroxiredoxin                                 |
| XP_009688998.1 | 0.219296   | 0.139851   | 1.56806      | 0.200353    | 0.12366    | 1.6202       | 1.59413   | hypothetical protein                                |
| XP_009688999.1 | 0.0849472  | 0.762677   | 0.11138      | 0.106636    | 0.713287   | 0.149499     | 0.130439  | conserved hypothetical protein                      |
| XP_009689000.1 | 0.0548396  | 0.876789   | 0.062546     | 0.040395    | 0.876516   | 0.0460858    | 0.054316  | 30S ribosomal protein S11                           |
| XP_009689001.1 | 0.0648269  | 0.38103    | 0.170136     | 0.0712043   | 0.289623   | 0.245851     | 0.207993  | uncharacterized protein                             |
| XP_009689002.1 | 0.0101846  | 0.28892    | 0.0352507    | 0.00853342  | 0.355472   | 0.0240059    | 0.029628  | uncharacterized protein                             |
| XP_009689003.1 | 0.0671358  | 0.686754   | 0.0977582    | 0.0682823   | 0.597645   | 0.114252     | 0.106005  | uncharacterized protein                             |

| protein_id     | Chitose_ka  | Chitose_ks | Chitose_kaks | Buffeli_ka  | Buffeli_ks | Buffeli_kaks | mean_kaks | function                                                |
|----------------|-------------|------------|--------------|-------------|------------|--------------|-----------|---------------------------------------------------------|
| XP_009689004.1 | 0.0550057   | 0.719267   | 0.0764746    | 0.0468883   | 0.510854   | 0.0917842    | 0.084129  | uncharacterized protein                                 |
| XP_009689005.1 | 0.0220722   | 0.279083   | 0.0790883    | 0.0342702   | 0.174171   | 0.196761     | 0.137925  | uncharacterized protein                                 |
| XP_009689006.1 | 0.0294917   | 0.36288    | 0.0812714    | 0.0429909   | 0.431767   | 0.0995696    | 0.09042   | conserved hypothetical protein                          |
| XP_009689007.1 | 0.0187961   | 0.568895   | 0.0330397    | 0.00802337  | 0.331762   | 0.0241841    | 0.028612  | proteasome subunit beta type 2                          |
| XP_009689008.1 | 0.00673665  | 0.475096   | 0.0141795    | 0.00501167  | 0.563526   | 0.00889341   | 0.011536  | prohibitin                                              |
| XP_009689009.1 | 0.0319272   | 0.310512   | 0.102821     | 0.0210172   | 0.166172   | 0.126479     | 0.11465   | conserved hypothetical protein                          |
| XP_009689010.1 | 0.000339298 | 0.339298   | 0.001        | 0.00435066  | 0.481547   | 0.00903474   | 0.005017  | chaperonin                                              |
| XP_009689011.1 | 0.0160802   | 0.608148   | 0.0264413    | 0.00829735  | 0.523727   | 0.0158429    | 0.021142  | peptidyl-prolyl cis-trans isomerase                     |
| XP_009689012.1 | 0.0386387   | 0.31139    | 0.124085     | 0.0264906   | 0.341689   | 0.0775283    | 0.100807  | NifU protein                                            |
| XP_009689013.1 | 0.0516585   | 0.375154   | 0.137699     | 0.0459044   | 0.267012   | 0.171919     | 0.154809  | 6-phosphogluconate dehydrogenase                        |
| XP_009689014.1 | 0.0359098   | 0.509164   | 0.0705269    | 0.0330169   | 0.551456   | 0.0598722    | 0.0652    | actin                                                   |
| XP_009689015.1 | 0.0279206   | 0.382662   | 0.0729642    | 0.0135906   | 0.406669   | 0.0334193    | 0.053192  | conserved hypothetical protein                          |
| XP_009689016.1 | 0.128547    | 0.27786    | 0.462632     | 0.158278    | 0.288877   | 0.54791      | 0.505271  | conserved hypothetical protein                          |
| XP_009689017.1 | 0.117258    | 0.210683   | 0.556564     | 0.115252    | 0.251556   | 0.458154     | 0.507359  | hypothetical protein                                    |
| XP_009689018.1 | 0.0544065   | 0.264987   | 0.205318     | 0.0385375   | 0.295742   | 0.130308     | 0.167813  | uncharacterized protein                                 |
| XP_009689019.1 | 0.031733    | 0.310957   | 0.102049     |             |            |              | 0.102049  | conserved hypothetical protein                          |
| XP_009689020.1 | 0.0113404   | 0.528185   | 0.0214704    | 0.013797    | 0.513739   | 0.0268562    | 0.024163  | 60S ribosomal protein L13                               |
| XP_009689021.1 | 0.0031522   | 0.295909   | 0.0106526    | 0.00328933  | 0.366655   | 0.0089712    | 0.009812  | 40S ribosomal protein S16                               |
| XP_009689022.1 | 0.0195697   | 0.44966    | 0.0435212    | 0.0104559   | 0.421669   | 0.0247964    | 0.034159  | ATP synthase subunit gamma%2C mitochondrial precursor   |
| XP_009689023.1 | 0.0209922   | 0.373008   | 0.0562781    | 0.0090058   | 0.39487    | 0.022807     | 0.039543  | uncharacterized protein                                 |
| XP_009689024.1 | 0.0303943   | 0.472263   | 0.0643588    | 0.019382    | 0.385408   | 0.0502897    | 0.057324  | conserved hypothetical protein                          |
| XP_009689025.1 | 0.057119    | 0.584862   | 0.0976624    | 0.0257882   | 0.391401   | 0.0658869    | 0.081775  | conserved hypothetical protein                          |
| XP_009689026.1 | 0.0299857   | 0.439512   | 0.0682249    | 0.0328352   | 0.545773   | 0.0601627    | 0.064194  | uncharacterized protein                                 |
| XP_009689027.1 | 0.0571533   | 0.388972   | 0.146934     | 0.0510041   | 0.457016   | 0.111602     | 0.129268  | conserved hypothetical protein                          |
| XP_009689028.1 | 0.0256721   | 1.24204    | 0.0206694    | 0.0304994   | 1.37909    | 0.0221155    | 0.021392  | Bromodomain protein                                     |
| XP_009689029.1 | 0.0132917   | 0.351812   | 0.0377807    | 0.0149379   | 0.592146   | 0.0252268    | 0.031504  | succinate dehydrogenase                                 |
| XP_009689030.1 | 0.0842304   | 0.453006   | 0.185937     | 0.0447583   | 0.344358   | 0.129976     | 0.157956  | conserved hypothetical protein                          |
| XP_009689031.1 | 0.0681689   | 0.339384   | 0.200861     | 0.0695129   | 0.307498   | 0.22606      | 0.21346   | autoaggregation-mediating protein                       |
| XP_009689032.1 | 0.0158267   | 0.340601   | 0.0464671    | 0.0172065   | 0.234576   | 0.0733518    | 0.059909  | conserved hypothetical protein                          |
| XP_009689033.1 | 0.0441472   | 0.656416   | 0.0672549    | 0.0347204   | 0.638625   | 0.0543675    | 0.060811  | uncharacterized protein                                 |
| XP_009689034.1 | 0.0401883   | 0.642312   | 0.0625683    | 0.0355592   | 0.585498   | 0.0607333    | 0.061651  | conserved hypothetical protein                          |
| XP_009689035.1 | 0.0218988   | 0.612271   | 0.0357665    | 0.00918988  | 0.454337   | 0.020227     | 0.027997  | uncharacterized protein                                 |
| XP_009689036.1 | 0.0781489   | 0.394212   | 0.198241     | 0.0589707   | 0.41114    | 0.143432     | 0.170837  | uncharacterized protein                                 |
| XP_009689037.1 | 0.0287691   | 0.296722   | 0.0969562    | 0.0311875   | 0.287695   | 0.108405     | 0.102681  | glycerol-3-phosphate acyltransferase                    |
| XP_009689038.1 | 0.0377014   | 0.309145   | 0.121954     | 0.0420188   | 0.292614   | 0.143598     | 0.132776  | conserved hypothetical protein                          |
| XP_009689039.1 | 0.118824    | 0.0642894  | 1.84827      | 0.0977158   | 0.0400812  | 2.43795      | 2.14311   | conserved hypothetical protein                          |
| XP_009689040.1 | 0.0817609   | 0.413227   | 0.19786      | 0.0541641   | 0.415643   | 0.130314     | 0.164087  | conserved hypothetical protein                          |
| XP_009689041.1 | 0.0566057   | 0.536918   | 0.105427     | 0.0499893   | 0.356662   | 0.140159     | 0.122793  | uncharacterized protein                                 |
| XP_009689042.1 | 0.0115048   | 0.285896   | 0.0402411    | 0.00298697  | 0.0892805  | 0.033456     | 0.036849  | DNA-directed RNA polymerase II                          |
| XP_009689043.1 |             |            | NA           | NA          | NA         | NA           |           | conserved hypothetical protein                          |
| XP_009689044.1 | 0.0114864   | 0.378716   | 0.0303298    | 0.000318431 | 0.318431   | 0.001        | 0.015665  | centrin 3                                               |
| XP_009689045.1 | 0.127934    | 0.234432   | 0.545719     |             |            |              | 0.545719  | hypothetical protein                                    |
| XP_009689046.1 | 0.0599355   | 0.834644   | 0.0718097    | 0.0628567   | 0.801091   | 0.0784638    | 0.075137  | E3 ubiquitin-protein ligase HUWE1                       |
| XP_009689047.1 | 0.0759473   | 0.542643   | 0.139958     | 0.0905836   | 0.564351   | 0.160509     | 0.150234  | conserved hypothetical protein                          |
| XP_009689048.1 | 0.0144819   | 0.44864    | 0.0322795    | 0.0163851   | 0.482468   | 0.033961     | 0.03312   | uncharacterized protein                                 |
| XP_009689049.1 | 0.024184    | 0.304391   | 0.0794505    | 0.0224381   | 0.30158    | 0.074402     | 0.076926  | conserved hypothetical protein                          |
| XP_009689050.1 | 0.00325102  | 0.431051   | 0.00754206   | 0.000612727 | 0.612727   | 0.001        | 0.004271  | DNA-directed RNA polymerases I%2C II%2C and III subunit |
| XP_009689051.1 | 0.0276257   | 0.78468    | 0.0352063    | 0.0448325   | 1.9301     | 0.023228     | 0.029217  | dynein light chain 1                                    |
| XP_009689052.1 | 0.0412902   | 0.789159   | 0.0523218    | 0.0391412   | 0.681141   | 0.0574641    | 0.054893  | eukaryotic translation initiation factor 3 subunit 10   |
| XP_009689053.1 | 0.0645111   | 0.406134   | 0.158842     | 0.0596927   | 0.442595   | 0.13487      | 0.146856  | uncharacterized protein                                 |
| XP_009689054.1 | 0.0345501   | 0.465475   | 0.0742255    | 0.0164314   | 0.352096   | 0.0466673    | 0.060446  | pre-rRNA processing protein                             |
| XP_009689055.1 | 0.0466657   | 0.444493   | 0.104986     | 0.0520554   | 0.459398   | 0.113312     | 0.109149  | RNA-binding motif protein%2C X-linked 2                 |
| XP_009689056.1 | 0.0516404   | 0.486669   | 0.10611      | 0.0448046   | 0.399161   | 0.112247     | 0.109178  | conserved hypothetical protein                          |

| protein_id     | Chitose_ka  | Chitose_ks | Chitose_kaks | Buffeli_ka  | Buffeli_ks | Buffeli_kaks | mean_kaks | function                                                                                                          |
|----------------|-------------|------------|--------------|-------------|------------|--------------|-----------|-------------------------------------------------------------------------------------------------------------------|
| XP_009689057.1 | 0.0229385   | 0.508709   | 0.0450917    | 0.0213314   | 0.53342    | 0.0399899    | 0.042541  | uncharacterized protein                                                                                           |
| XP_009689058.1 | 0.00765157  | 0.518649   | 0.0147529    | 0.00805831  | 0.665729   | 0.0121045    | 0.013429  | T-complex protein 1 delta subunit                                                                                 |
| XP_009689059.1 | 0.0538625   | 0.476695   | 0.112992     | 0.0470719   | 0.395048   | 0.119155     | 0.116073  | uncharacterized protein                                                                                           |
| XP_009689060.1 | 0.100018    | 0.588734   | 0.169886     | 0.0897294   | 0.510443   | 0.175787     | 0.172837  | uncharacterized protein                                                                                           |
| XP_009689061.1 | 0.0568277   | 0.714882   | 0.0794925    | 0.0652337   | 0.714791   | 0.0912626    | 0.085378  | uncharacterized protein                                                                                           |
| XP_009689062.1 | 0.0976159   | 0.453024   | 0.215476     | 0.0980929   | 0.49346    | 0.198786     | 0.207131  | conserved hypothetical protein                                                                                    |
| XP_009689063.1 | 0.092122    | 0.344162   | 0.26767      |             |            |              | 0.26767   | conserved hypothetical protein                                                                                    |
| XP_009689064.1 | 0.0305781   | 0.319581   | 0.0956818    | 0.0222179   | 0.255796   | 0.0868579    | 0.09127   | conserved hypothetical protein                                                                                    |
| XP_009689066.1 | 0.0544832   | 0.407618   | 0.133662     | 0.0441823   | 0.344987   | 0.12807      | 0.130866  | ABC transporter                                                                                                   |
| XP_009689067.1 | 0.0703973   | 0.456453   | 0.154227     | 0.0668402   | 0.372077   | 0.179641     | 0.166934  | uncharacterized protein                                                                                           |
| XP_009689068.1 | 0.0415318   | 0.55608    | 0.0746868    | 0.0386788   | 0.398966   | 0.0969476    | 0.085817  | uncharacterized protein                                                                                           |
| XP_009689069.1 | 0.0391878   | 0.316332   | 0.0391878    | 0.123882    | 0.273837   | 0.13864      | 0.131261  | uncharacterized protein                                                                                           |
| XP_009689070.1 | 0.0210521   | 0.507473   | 0.0414843    | 0.0167922   | 0.443064   | 0.0379001    | 0.039692  | acyl transferase                                                                                                  |
| XP_009689071.1 | 0.0668961   | 0.537941   | 0.124356     | 0.0517966   | 0.554432   | 0.0934227    | 0.108889  | uncharacterized protein                                                                                           |
| XP_009689072.1 | 0.0603462   | 0.678098   | 0.0889933    | 0.0581879   | 0.575441   | 0.101119     | 0.095056  | mRNA capping enzyme subunit                                                                                       |
| XP_009689073.1 | 0.0282671   | 0.432894   | 0.065298     | 0.0312988   | 0.456706   | 0.0685317    | 0.066915  | peptidyl-prolyl cis-trans isomerase                                                                               |
| XP_009689074.1 | 0.0500136   | 0.497875   | 0.100454     | 0.0383113   | 0.42413    | 0.0903292    | 0.095392  | conserved hypothetical protein                                                                                    |
| XP_009689075.1 | 0.0388739   | 0.463379   | 0.0838923    | 0.0353958   | 0.365946   | 0.096724     | 0.090308  | dihydrolipoamide succinyltransferase component of 2-oxoglutarate dehydrogenase complex%2C mitochondrial precursor |
| XP_009689076.1 | 0.0477956   | 1.15394    | 0.0414194    | 0.0457079   | 1.17827    | 0.0387924    | 0.040106  | uncharacterized protein                                                                                           |
| XP_009689077.1 | 0.0309828   | 0.423897   | 0.0730903    | 0.0294474   | 0.412973   | 0.0713057    | 0.072198  | glutathione synthetase                                                                                            |
| XP_009689078.1 | 0.0265989   | 0.501335   | 0.0530561    | 0.0217049   | 0.345503   | 0.062821     | 0.057939  | glutathione synthetase                                                                                            |
| XP_009689079.1 | 0.0883979   | 0.337662   | 0.261794     | 0.0780549   | 0.345787   | 0.225731     | 0.243762  | conserved hypothetical protein                                                                                    |
| XP_009689080.1 | 0.0390243   | 0.491974   | 0.0793217    | 5.69974E-05 | 0.0569974  | 0.001        | 0.040161  | prefoldin subunit                                                                                                 |
| XP_009689081.1 | 0.0832355   | 0.407931   | 0.204043     |             |            |              | 0.204043  | conserved hypothetical protein                                                                                    |
| XP_009689082.1 | 0.0350847   | 0.45502    | 0.0771059    | 0.0418461   | 0.35799    | 0.116892     | 0.096999  | uncharacterized protein                                                                                           |
| XP_009689083.1 | 0.0472933   | 0.353597   | 0.133749     |             |            |              | 0.133749  | conserved hypothetical protein                                                                                    |
| XP_009689084.1 | 0.0717051   | 0.449613   | 0.159482     | 0.0788511   | 0.507551   | 0.155356     | 0.157419  | conserved hypothetical protein                                                                                    |
| XP_009689085.1 | 0.0422085   | 0.620505   | 0.0680229    | 0.0345915   | 0.666508   | 0.0518996    | 0.059961  | uncharacterized protein                                                                                           |
| XP_009689086.1 | 0.0404419   | 0.692018   | 0.0584405    | 0.0408928   | 0.733555   | 0.0557461    | 0.057093  | MORN motif repeat containing protein                                                                              |
| XP_009689087.1 | 0.0784134   | 0.454365   | 0.172578     | 0.0746306   | 0.43679    | 0.170861     | 0.17172   | conserved hypothetical protein                                                                                    |
| XP_009689088.1 | 0.0262976   | 0.25785    | 0.101988     | 0.0244385   | 0.265583   | 0.0920181    | 0.097003  | translationally-controlled tumor protein homolog TCTP                                                             |
| XP_009689089.1 | 0.0505418   | 0.377478   | 0.133893     | 0.0484938   | 0.412779   | 0.117481     | 0.125687  | conserved hypothetical protein                                                                                    |
| XP_009689090.1 | 0.0221273   | 0.478209   | 0.0462712    | 0.019065    | 0.495747   | 0.0384571    | 0.042364  | translation elongation factor G                                                                                   |
| XP_009689091.1 | 0.00148537  | 0.470033   | 0.00316014   | 0.0015334   | 0.395221   | 0.00387985   | 0.00352   | developmentally regulated GTP-binding protein 1                                                                   |
| XP_009689092.1 | 0.0367078   | 0.357206   | 0.102764     | 0.0305262   | 0.35957    | 0.0848964    | 0.09383   | uncharacterized protein                                                                                           |
| XP_009689093.1 | 0.045815    | 0.712761   | 0.0642783    | 0.0437174   | 0.629514   | 0.0694462    | 0.066862  | uncharacterized protein                                                                                           |
| XP_009689094.1 | 0.127107    | 0.268356   | 0.473653     | 0.0656803   | 0.220016   | 0.298525     | 0.386089  | hypothetical protein                                                                                              |
| XP_009689095.1 | 0.0492406   | 0.64061    | 0.0768651    | 0.0817193   | 1.1319     | 0.0721968    | 0.074531  | importin beta                                                                                                     |
| XP_009689096.1 | 0.123069    | 0.482178   | 0.255236     | 0.129079    | 0.580127   | 0.222501     | 0.238869  | uncharacterized protein                                                                                           |
| XP_009689097.1 | 0.030562    | 0.549818   | 0.0555856    | 0.0202446   | 0.544831   | 0.0371576    | 0.046372  | uncharacterized protein                                                                                           |
| XP_009689098.1 | 0.0751773   | 0.63757    | 0.117912     | 0.0641959   | 0.634628   | 0.101155     | 0.109534  | structural maintenance of chromosome protein%2C type 1                                                            |
| XP_009689099.1 | 0.041496    | 0.455111   | 0.0911778    | 0.000302464 | 0.302464   | 0.001        | 0.046089  | ubiquitin-fold modifier 1 precursor                                                                               |
| XP_009689100.1 | 0.0508333   | 0.675664   | 0.0752346    | 0.0531882   | 0.738111   | 0.0720599    | 0.073647  | conserved hypothetical protein                                                                                    |
| XP_009689101.1 | 0.000479651 | 0.479651   | 0.001        | 0.00163394  | 0.299745   | 0.00545111   | 0.003226  | 26S proteasome regulatory particle                                                                                |
| XP_009689102.1 | 0.0493199   | 0.502357   | 0.098177     | 0.0447904   | 0.403475   | 0.111012     | 0.104595  | conserved hypothetical protein                                                                                    |
| XP_009689103.1 | 0.0241574   | 0.323439   | 0.0746891    | 0.0361582   | 0.330665   | 0.10935      | 0.09202   | hydroxyacylglutathione hydrolase                                                                                  |
| XP_009689104.1 | 0.0155815   | 0.345268   | 0.0451288    |             |            |              | 0.0451288 | 60S ribosomal protein L38                                                                                         |
| XP_009689105.1 | 0.0168643   | 0.682063   | 0.0247255    | 0.0222891   | 0.512573   | 0.0434848    | 0.034105  | 60S acidic ribosomal protein P0                                                                                   |
| XP_009689106.1 | 0.0441864   | 0.388337   | 0.113784     | 0.0486567   | 0.603792   | 0.0805852    | 0.097185  | uncharacterized protein                                                                                           |
| XP_009689107.1 | 0.121821    | 0.514277   | 0.236878     | 0.0189218   | 0.429634   | 0.0440416    | 0.14046   | conserved hypothetical protein                                                                                    |
| XP_009689108.1 | 0.0534359   | 0.515793   | 0.1036       | 0.0449792   | 0.434084   | 0.103619     | 0.103609  | conserved hypothetical protein                                                                                    |
| XP_009689109.1 | 0.0641691   | 0.44126    | 0.145422     | 0.0602115   | 0.347761   | 0.17314      | 0.159281  | uncharacterized protein                                                                                           |
| XP_009689110.1 | 0.00840888  | 0.139665   | 0.0602076    |             |            |              | 0.0602076 | uncharacterized protein                                                                                           |

| protein_id     | Chitose_ka  | Chitose_ks | Chitose_kaks | Buffeli_ka  | Buffeli_ks | Buffeli_kaks | mean_kaks | function                                                 |
|----------------|-------------|------------|--------------|-------------|------------|--------------|-----------|----------------------------------------------------------|
| XP_009689111.1 | 0.0135228   | 0.499544   | 0.0270703    | 0.00992007  | 0.356893   | 0.0277957    | 0.027433  | glycerol-3-phosphate dehydrogenase                       |
| XP_009689112.1 | 0.0661833   | 0.396856   | 0.166769     | 0.058529    | 0.314412   | 0.186154     | 0.176461  | serine/threonine protein kinase                          |
| XP_009689113.1 | 0.0520455   | 0.539595   | 0.0964529    | 0.0499119   | 0.634351   | 0.0786818    | 0.087567  | conserved hypothetical protein                           |
| XP_009689114.1 | 0.0111475   | 0.108095   | 0.103127     |             |            |              | 0.103127  | conserved hypothetical protein                           |
| XP_009689115.1 | 0.098714    | 0.561727   | 0.175733     | 0.0935259   | 0.564301   | 0.165738     | 0.170735  | conserved hypothetical protein                           |
| XP_009689116.1 |             |            |              | 0.0153211   | 0.167802   | 0.0913046    | 0.0913046 | 3'-5' exoribonuclease                                    |
| XP_009689117.1 | 0.142195    | 0.469929   | 0.302588     | 0.115111    | 0.490825   | 0.234525     | 0.268557  | conserved hypothetical protein                           |
| XP_009689118.1 | 0.0640521   | 0.355494   | 0.180178     | 0.0307543   | 0.438976   | 0.0700592    | 0.125119  | molecular chaperone                                      |
| XP_009689119.1 | 0.0965884   | 0.737547   | 0.130959     | 0.0871219   | 0.749514   | 0.116238     | 0.123599  | uncharacterized protein                                  |
| XP_009689120.1 | 0.0519304   | 0.287254   | 0.180782     | 0.0372497   | 0.172306   | 0.216184     | 0.198483  | conserved hypothetical protein                           |
| XP_009689121.1 | 0.0131379   | 0.272113   | 0.0482812    | 0.00834237  | 0.190956   | 0.0436874    | 0.045984  | eukaryotic translation initiation factor                 |
| XP_009689122.1 | 0.0761444   | 0.292082   | 0.260696     |             |            |              | 0.260696  | conserved hypothetical protein                           |
| XP_009689123.1 | 0.0360304   | 0.393218   | 0.0916296    |             |            |              | 0.0916296 | predicted protein                                        |
| XP_009689124.1 | 0.0406338   | 0.410866   | 0.098898     | 0.0341662   | 0.546033   | 0.0625717    | 0.080735  | conserved hypothetical protein                           |
| XP_009689125.1 | 0.0795035   | 0.211909   | 0.375177     | 0.0508349   | 0.336533   | 0.151055     | 0.263116  | hypothetical protein                                     |
| XP_009689126.1 | 0.0306963   | 0.30839    | 0.0995371    | 0.0266201   | 0.297449   | 0.0894947    | 0.094516  | serine protease                                          |
| XP_009689127.1 | 0.0844868   | 0.400041   | 0.211195     | 0.040155    | 0.106786   | 0.376033     | 0.293614  | potential glutaredoxin                                   |
| XP_009689128.1 | 0.0982273   | 0.616741   | 0.159268     | 0.0935125   | 0.675986   | 0.138335     | 0.148802  | conserved hypothetical protein                           |
| XP_009689129.1 | 0.0186621   | 0.513202   | 0.036364     | 0.0124874   | 0.123938   | 0.100755     | 0.068559  | uncharacterized protein                                  |
| XP_009689130.1 | 0.0188975   | 0.417816   | 0.0452292    | 0.0248778   | 0.564102   | 0.0441017    | 0.044665  | tubulin subunit alpha                                    |
| XP_009689131.1 | 0.0506661   | 0.872166   | 0.0580923    | 0.05489     | 0.986628   | 0.0556339    | 0.056863  | conserved hypothetical protein                           |
| XP_009689132.1 | 0.0285963   | 0.559522   | 0.0511084    | 0.0480449   | 0.635662   | 0.0755825    | 0.063345  | conserved hypothetical protein                           |
| XP_009689133.1 | 0.080528    | 0.896438   | 0.0898311    | 0.0779422   | 0.833346   | 0.0935292    | 0.09168   | predicted protein                                        |
| XP_009689134.1 | 0.0504886   | 0.16819    | 0.300187     |             |            |              | 0.300187  | uncharacterized protein                                  |
| XP_009689135.1 | 0.0123109   | 0.279643   | 0.0440236    |             |            |              | 0.0440236 | conserved hypothetical protein                           |
| XP_009689136.1 | 0.0261196   | 0.263046   | 0.0992968    | 0.031988    | 0.568429   | 0.0562743    | 0.077786  | uncharacterized protein                                  |
| XP_009689137.1 | 0.0320646   | 0.30606    | 0.104766     |             |            |              | 0.104766  | Bet3 transport protein                                   |
| XP_009689139.1 | 0.186694    | 0.354418   | 0.526763     | 0.157906    | 0.458454   | 0.344432     | 0.435597  | conserved hypothetical protein                           |
| XP_009689140.1 | 0.00319062  | 0.410408   | 0.00777425   | 0.00695508  | 0.543638   | 0.0127936    | 0.010284  | eukaryotic translation initiation factor 2 subunit gamma |
| XP_009689141.1 | 0.0363228   | 0.534054   | 0.0680133    | 0.0525459   | 0.564098   | 0.0931503    | 0.080582  | uncharacterized protein                                  |
| XP_009689142.1 | 0.0335792   | 0.401427   | 0.0836497    | 0.0106705   | 0.178271   | 0.0598555    | 0.071753  | Conserved hypothetical protein                           |
| XP_009689144.1 | 0.0505995   | 0.361364   | 0.140023     | 0.0250368   | 0.0735967  | 0.34019      | 0.240107  | uncharacterized protein                                  |
| XP_009689145.1 | 0.131276    | 0.516283   | 0.254272     | 0.102507    | 0.454375   | 0.2256       | 0.239936  | conserved hypothetical protein                           |
| XP_009689146.1 | 0.127969    | 0.656484   | 0.194931     | 0.126262    | 0.579213   | 0.217988     | 0.206459  | hypothetical protein                                     |
| XP_009689148.1 | 0.0398715   | 0.411386   | 0.0969198    | 0.0323006   | 0.415383   | 0.0777611    | 0.08734   | uncharacterized protein                                  |
| XP_009689149.1 | 0.126137    | 0.429681   | 0.293559     | 0.122372    | 0.450694   | 0.271518     | 0.282539  | conserved hypothetical protein                           |
| XP_009689150.1 | 0.0402982   | 0.525747   | 0.0766495    | 0.044407    | 0.371743   | 0.119456     | 0.098053  | uncharacterized protein                                  |
| XP_009689151.1 | 0.0390862   | 0.896672   | 0.0435903    | 0.0418121   | 0.934908   | 0.0447233    | 0.044157  | uncharacterized protein                                  |
| XP_009689152.1 | 0.0393821   | 0.710004   | 0.0554675    | 0.0419925   | 0.7916     | 0.0530477    | 0.054258  | uncharacterized protein                                  |
| XP_009689153.1 | 0.0534664   | 0.521561   | 0.102512     | 0.0371825   | 0.668269   | 0.0556401    | 0.079076  | conserved hypothetical protein                           |
| XP_009689154.1 | 0.0828086   | 0.195359   | 0.423879     | 0.0781774   | 0.2324     | 0.336391     | 0.380135  | uncharacterized protein                                  |
| XP_009689155.1 | 0.052168    | 0.432215   | 0.120699     | 0.0320814   | 0.386973   | 0.0829035    | 0.101801  | conserved hypothetical protein                           |
| XP_009689156.1 | 0.00305171  | 0.306948   | 0.00994209   | 0.0555451   | 0.296624   | 0.187258     | 0.0986    | ribosomal protein S18                                    |
| XP_009689157.1 | 0.000371489 | 0.371489   | 0.001        | 0.000309385 | 0.309385   | 0.001        | 0.001     | 60S ribosomal protein L11a                               |
| XP_009689158.1 | 0.0328665   | 0.35449    | 0.0927149    | 0.0191732   | 0.467492   | 0.0410129    | 0.066864  | conserved hypothetical protein                           |
| XP_009689159.1 | 0.0819916   | 0.401267   | 0.204332     | 0.0520441   | 0.28741    | 0.18108      | 0.192706  | uncharacterized protein                                  |
| XP_009689160.1 | 0.033333    | 0.763      | 0.0436868    | 0.0440131   | 0.721311   | 0.0610181    | 0.052352  | Map2 kinase                                              |
| XP_009689161.1 | 0.00364162  | 0.208814   | 0.0174395    | 0.00784914  | 0.200229   | 0.0392007    | 0.02832   | uncharacterized protein                                  |
| XP_009689162.1 | 0.0432364   | 0.39168    | 0.110387     | 0.0352117   | 0.184733   | 0.190609     | 0.150498  | conserved hypothetical protein                           |
| XP_009689163.1 | 0.0529988   | 0.740836   | 0.0715392    | 0.0568256   | 0.765103   | 0.0742718    | 0.072905  | Gmp reductase                                            |
| XP_009689164.1 | 0.0308788   | 0.348306   | 0.0886543    | 0.0366893   | 0.46104    | 0.0795794    | 0.084117  | proliferation-associated protein 2g4                     |
| XP_009689165.1 | 0.0742676   | 0.494165   | 0.150289     | 0.076575    | 0.63468    | 0.120651     | 0.13547   | conserved hypothetical protein                           |
| XP_009689166.1 | 0.084028    | 0.393648   | 0.21346      | 0.0486707   | 0.312237   | 0.155878     | 0.184669  | uncharacterized protein                                  |

| protein_id     | Chitose_ka | Chitose_ks | Chitose_kaks | Buffeli_ka  | Buffeli_ks | Buffeli_kaks | mean_kaks | function                                                  |
|----------------|------------|------------|--------------|-------------|------------|--------------|-----------|-----------------------------------------------------------|
| XP_009689167.1 | 0.0223568  | 0.269488   | 0.08296      |             |            |              | 0.08296   | ribosomal protein L13                                     |
| XP_009689168.1 | 0.0283324  | 0.556673   | 0.050896     | 0.0274106   | 0.675886   | 0.040555     | 0.045726  | conserved hypothetical protein                            |
| XP_009689169.1 | 0.0301454  | 0.771783   | 0.0390594    | 0.0380473   | 0.74248    | 0.0512435    | 0.045151  | protein transport protein sec24-like                      |
| XP_009689170.1 | 0.0610878  | 0.339784   | 0.179784     | 0.0598278   | 0.362806   | 0.164903     | 0.172343  | ATP-dependent RNA helicase                                |
| XP_009689171.1 | 0.0169602  | 0.38737    | 0.0437831    | 0.0169288   | 0.351468   | 0.048166     | 0.045975  | conserved hypothetical protein                            |
| XP_009689172.1 | 0.0062525  | 0.469182   | 0.0133264    | 0.000307766 | 0.307766   | 0.001        | 0.007163  | small nuclear ribonucleoprotein f                         |
| XP_009689173.1 | 0.0527481  | 0.645777   | 0.0816816    | 0.0331262   | 0.729438   | 0.0454133    | 0.063547  | tRNA (guanine-n-(7))-methyltransferase                    |
| XP_009689174.1 | 0.140356   | 0.53907    | 0.260368     |             |            |              | 0.260368  | conserved hypothetical protein                            |
| XP_009689175.1 | 0.155262   | 0.45093    | 0.344316     | 0.0989681   | 0.268165   | 0.369056     | 0.356686  | conserved hypothetical protein                            |
| XP_009689176.1 | 0.0441758  | 0.971276   | 0.0454822    | 0.0244085   | 0.790224   | 0.030888     | 0.038185  | deoxyuridine 5'-triphosphate nucleotidohydrolase          |
| XP_009689177.1 | 0.0690926  | 0.592995   | 0.116515     | 0.0619142   | 0.58559    | 0.10573      | 0.111122  | conserved hypothetical protein                            |
| XP_009689178.1 | 0.0254047  | 0.551144   | 0.0460945    | 0.0246623   | 0.433482   | 0.0568934    | 0.051494  | uncharacterized protein                                   |
| XP_009689179.1 | 0.132696   | 0.313171   | 0.423719     | 0.157907    | 0.397859   | 0.396891     | 0.410305  | conserved hypothetical protein                            |
| XP_009689180.1 | 0.0341786  | 0.692132   | 0.0493816    | 0.0351396   | 0.563275   | 0.0623844    | 0.055883  | DNA polymerase I                                          |
| XP_009689181.1 | 0.039016   | 0.211702   | 0.184297     |             |            |              | 0.184297  | uncharacterized protein                                   |
| XP_009689182.1 | 0.0368225  | 0.702022   | 0.052452     | 0.0174704   | 0.618718   | 0.0282365    | 0.040344  | ATP synthase subunit beta                                 |
| XP_009689183.1 | 0.0648736  | 0.88162    | 0.0735846    | 0.0480761   | 0.956128   | 0.050282     | 0.061933  | serine hydroxymethyltransferase                           |
| XP_009689184.1 | 0.0794626  | 0.729265   | 0.108963     | 0.101244    | 0.536857   | 0.188586     | 0.148775  | uncharacterized protein                                   |
| XP_009689185.1 | 0.113636   | 0.489222   | 0.232279     | 0.0970291   | 0.455307   | 0.213107     | 0.222693  | conserved hypothetical protein                            |
| XP_009689186.1 | 0.0178204  | 0.533775   | 0.0333856    | 0.0617894   | 0.513009   | 0.120445     | 0.076915  | uncharacterized protein                                   |
| XP_009689187.1 | 0.0373581  | 0.526696   | 0.0709291    | 0.0314978   | 0.486621   | 0.0647276    | 0.067828  | coatamer complex subunit beta                             |
| XP_009689188.1 | 0.0262334  | 0.0339466  | 0.772784     | 0.0498009   | 0.48867    | 0.101911     | 0.437348  | uncharacterized protein                                   |
| XP_009689189.1 | 0.0683238  | 0.734367   | 0.0930377    | 0.0653473   | 0.676403   | 0.09661      | 0.094824  | uncharacterized protein                                   |
| XP_009689190.1 | 0.0235719  | 1.10877    | 0.0212594    | 0.0217898   | 1.09138    | 0.0199654    | 0.020612  | aminopeptidase N                                          |
| XP_009689191.1 | 0.0510096  | 2.8788     | 0.017719     | 0.00580984  | 4.29114    | 0.00135392   | 0.009536  | hypothetical protein                                      |
| XP_009689192.1 | 0.02904    | 0.61859    | 0.0469454    | 0.026699    | 0.65011    | 0.0410683    | 0.044007  | exosome complex exonuclease rrp41                         |
| XP_009689193.1 | 0.00583123 | 0.348641   | 0.0167256    | 0.00204584  | 0.32523    | 0.00629044   | 0.011508  | uncharacterized protein                                   |
| XP_009689194.1 | 0.0558651  | 0.519715   | 0.107492     | 0.0388858   | 0.424038   | 0.0917035    | 0.099598  | conserved hypothetical protein                            |
| XP_009689195.1 | 0.0547164  | 0.527951   | 0.103639     | 0.048345    | 0.481428   | 0.10042      | 0.102029  | conserved hypothetical protein                            |
| XP_009689197.1 | 0.0644056  | 0.456163   | 0.14119      | 0.0642501   | 0.378135   | 0.169913     | 0.155552  | transporter                                               |
| XP_009689198.1 | 0.135478   | 0.537439   | 0.252081     | 0.108247    | 0.660221   | 0.163956     | 0.208018  | conserved hypothetical protein                            |
| XP_009689199.1 | 0.0695216  | 0.449921   | 0.15452      | 0.0504568   | 0.390671   | 0.129154     | 0.141837  | uncharacterized protein                                   |
| XP_009689200.1 | 0.118589   | 0.059117   | 2.00601      |             |            |              | 2.00601   | hypothetical protein                                      |
| XP_009689201.1 | 0.126924   | 0.752967   | 0.168565     | 0.105107    | 0.660937   | 0.159028     | 0.163797  | HEAT repeat containing protein                            |
| XP_009689202.1 | 0.119623   | 0.778248   | 0.153708     |             |            |              | 0.153708  | uncharacterized protein                                   |
| XP_009689203.1 | 0.0268216  | 0.748941   | 0.0358126    | 0.0272004   | 0.813915   | 0.0334192    | 0.034616  | conserved hypothetical protein                            |
| XP_009689204.1 | 0.00746251 | 0.220593   | 0.0338293    | 0.00385304  | 0.203615   | 0.0189232    | 0.026376  | conserved hypothetical protein                            |
| XP_009689205.1 | 0.0226875  | 0.344025   | 0.0659472    |             |            |              | 0.0659472 | conserved hypothetical protein                            |
| XP_009689206.1 | 0.0142982  | 0.703678   | 0.0203193    | 0.00412993  | 1.67805    | 0.00246115   | 0.01139   | ribosomal protein l6                                      |
| XP_009689207.1 | 0.0140813  | 0.295123   | 0.0477135    | 0.0149628   | 0.332639   | 0.0449822    | 0.046348  | ribosomal protein S15%2C mitochondrial precursor          |
| XP_009689208.1 | 0.0512951  | 0.604939   | 0.0847939    | 0.0442688   | 0.55754    | 0.0794002    | 0.082097  | uncharacterized protein                                   |
| XP_009689209.1 | 0.0382217  | 0.954713   | 0.0400347    | 0.0702516   | 0.467739   | 0.150194     | 0.095114  | uncharacterized protein                                   |
| XP_009689210.1 | 0.0720565  | 0.698406   | 0.103173     | 0.0652512   | 0.57707    | 0.113073     | 0.108123  | conserved hypothetical protein                            |
| XP_009689211.1 | 0.101545   | 0.505729   | 0.200791     | 0.122845    | 0.474304   | 0.259        | 0.229896  | uncharacterized protein                                   |
| XP_009689212.1 | 0.130941   | 0.394381   | 0.332018     | 0.111647    | 0.387048   | 0.288458     | 0.310238  | conserved hypothetical protein                            |
| XP_009689213.1 | 0.044803   | 0.897216   | 0.0499356    | 0.0346214   | 0.789729   | 0.0438395    | 0.046888  | serine-threonine protein kinase                           |
| XP_009689214.1 | 0.041357   | 0.43046    | 0.0960763    | 0.0438728   | 0.391746   | 0.111993     | 0.104035  | peptide chain release factor 1%2C mitochondrial precursor |
| XP_009689215.1 | 0.0635962  | 0.385555   | 0.164947     | 0.0585714   | 0.407568   | 0.143709     | 0.154328  | uncharacterized protein                                   |
| XP_009689216.1 | 0.00638339 | 0.45689    | 0.0139714    | 0.00744574  | 0.65475    | 0.0113719    | 0.012672  | uncharacterized protein                                   |
| XP_009689217.1 | 0.0386647  | 0.668955   | 0.0577987    | 0.0305962   | 0.602021   | 0.0508224    | 0.054311  | conserved hypothetical protein                            |
| XP_009689218.1 | 0.0291704  | 0.465501   | 0.0626644    | 0.0381947   | 0.49544    | 0.0770925    | 0.069878  | conserved hypothetical protein                            |
| XP_009689219.1 | 0.069077   | 0.98076    | 0.0704322    | 0.0681405   | 0.950871   | 0.0716611    | 0.071047  | conserved hypothetical protein                            |
| XP_009689220.1 | 0.122141   | 0.410652   | 0.297432     | 0.12196     | 0.428645   | 0.284523     | 0.290978  | conserved hypothetical protein                            |

| protein_id     | Chitose_ka | Chitose_ks  | Chitose_kaks | Buffeli_ka | Buffeli_ks  | Buffeli_kaks | mean_kaks | function                                                  |
|----------------|------------|-------------|--------------|------------|-------------|--------------|-----------|-----------------------------------------------------------|
| XP_009689221.1 | 0.0549276  | 0.976089    | 0.0562731    | 0.0419776  | 0.937851    | 0.0447594    | 0.050516  | conserved hypothetical protein                            |
| XP_009689222.1 | 0.0611892  | 0.668349    | 0.0915528    | 0.0707611  | 0.790163    | 0.0895525    | 0.090553  | conserved hypothetical protein                            |
| XP_009689223.1 | 0.0237553  | 0.33468     | 0.0709722    | 0.0146495  | 0.261679    | 0.0559826    | 0.063477  | leucine-rich repeat%2C typical subtype containing protein |
| XP_009689224.1 | 0.0847295  | 0.526294    | 0.160993     | 0.082971   | 0.462022    | 0.179583     | 0.170288  | predicted protein                                         |
| XP_009689225.1 | 0.0549839  | 0.391562    | 0.140422     | 0.0507712  | 0.310511    | 0.163509     | 0.151965  | conserved hypothetical protein                            |
| XP_009689226.1 | 0.0661257  | 0.46604     | 0.141889     | 0.0753846  | 0.534863    | 0.140942     | 0.141415  | dihydrofolate synthase/folylpolyglutamate synthase        |
| XP_009689227.1 | 0.0801077  | 0.738983    | 0.108403     | 0.0787368  | 0.634048    | 0.124181     | 0.116292  | HEAT repeat containing protein                            |
| XP_009689228.1 | 0.0210998  | 0.371106    | 0.0568566    | NA         | NA          | NA           | NA        | uncharacterized protein                                   |
| XP_009689229.1 | 0.126118   | 0.417124    | 0.302352     |            |             |              | 0.302352  | Conserved hypothetical protein                            |
| XP_009689230.1 | 0.045508   | 0.336573    | 0.13521      | 0.0468493  | 0.275579    | 0.170003     | 0.152606  | tRNA delta (2)-isopentenylpyrophosphate transferase       |
| XP_009689231.1 | 0.0409117  | 0.588466    | 0.0695226    | 0.0492241  | 0.394779    | 0.124688     | 0.097105  | uncharacterized protein                                   |
| XP_009689232.1 | 0.0862758  | 0.566575    | 0.152276     | 0.0833916  | 0.452508    | 0.184287     | 0.168282  | conserved hypothetical protein                            |
| XP_009689233.1 | 0.0555188  | 0.00111038  | 50           | 0.0363371  | 0.000726814 | 49.995       | 49.9975   | conserved hypothetical protein                            |
| XP_009689237.1 | 0.0436099  | 0.719446    | 0.060616     | 0.0268842  | 0.613528    | 0.043819     | 0.052218  | DNA mismatch repair protein Msh2                          |
| XP_009689238.1 | 0.052746   | 0.742169    | 0.0710701    | 0.0500119  | 0.718287    | 0.0696266    | 0.070348  | conserved hypothetical protein                            |
| XP_009689239.1 | 0.0363345  | 0.262143    | 0.138606     | 0.0561225  | 0.375874    | 0.149312     | 0.143959  | uncharacterized protein                                   |
| XP_009689240.1 | 0.0308713  | 0.692518    | 0.0445783    | 0.0227774  | 0.841279    | 0.0270748    | 0.035827  | glycyl-tRNA synthetase                                    |
| XP_009689241.1 | 0.0413312  | 0.433437    | 0.0953568    | 0.0350649  | 0.434879    | 0.0806315    | 0.087994  | cytokine induced apoptosis inhibitor 1                    |
| XP_009689242.1 | 0.016548   | 0.692599    | 0.0238926    | 0.014135   | 0.705518    | 0.020035     | 0.021964  | histone acetyltransferase gcn5-related                    |
| XP_009689243.1 | 0.203638   | 0.0725212   | 2.80798      | 0.322144   | 0.163585    | 1.96928      | 2.38863   | hypothetical protein                                      |
| XP_009689244.1 | 0.0784259  | 0.985159    | 0.0796073    | 0.0649961  | 0.955871    | 0.0679967    | 0.073802  | uncharacterized protein                                   |
| XP_009689245.1 | 0.0847994  | 0.514927    | 0.164682     | 0.0679596  | 0.510996    | 0.132994     | 0.148838  | conserved hypothetical protein                            |
| XP_009689246.1 | 0.0312704  | 0.487542    | 0.0641388    | 0.0261289  | 0.425043    | 0.0614735    | 0.062806  | conserved hypothetical protein                            |
| XP_009689247.1 | 0.0112352  | 0.283301    | 0.0396582    |            |             |              | 0.0396582 | conserved hypothetical protein                            |
| XP_009689248.1 | 0.0560057  | 0.515033    | 0.108742     | 0.0473768  | 0.474647    | 0.0998148    | 0.104278  | integral membrane protein                                 |
| XP_009689249.1 | 0.0639701  | 0.305682    | 0.20927      | 0.0548547  | 0.266792    | 0.205609     | 0.207439  | uncharacterized protein                                   |
| XP_009689250.1 | 0.0376831  | 0.58219     | 0.0647265    | 0.0349242  | 0.508091    | 0.068736     | 0.066731  | conserved hypothetical protein                            |
| XP_009689251.1 | 0.0735621  | 0.477437    | 0.154077     | 0.0543728  | 0.462641    | 0.117527     | 0.135802  | conserved hypothetical protein                            |
| XP_009689252.1 | 0.0159814  | 0.356007    | 0.0448908    |            |             |              | 0.0448908 | conserved thioredoxin-like protein                        |
| XP_009689253.1 | 0.0246127  | 0.528066    | 0.0466092    | 0.0213761  | 0.682372    | 0.0313262    | 0.038968  | aspartate transcarbamoylase                               |
| XP_009689254.1 | 0.00854971 | 0.000172316 | 49.6164      |            |             |              | 49.6164   | hypothetical protein                                      |
| XP_009689255.1 | 0.123382   | 0.107988    | 1.14255      | 0.14377    | 0.108326    | 1.32721      | 1.23488   | hypothetical protein                                      |
| XP_009689256.1 | 0.050788   | 0.98022     | 0.0518128    | 0.0552134  | 0.647851    | 0.0852255    | 0.068519  | uncharacterized protein                                   |
| XP_009689257.1 | 0.036686   | 0.589645    | 0.0622171    | 0.0464163  | 0.537949    | 0.0862838    | 0.07425   | HSP70 chaperone                                           |
| XP_009689258.1 | 0.0973442  | 0.614607    | 0.158385     | 0.123523   | 0.73084     | 0.169015     | 0.1637    | conserved hypothetical protein                            |
| XP_009689259.1 | 0.110298   | 0.451665    | 0.244202     | 0.0996211  | 0.445013    | 0.223861     | 0.234032  | uncharacterized protein                                   |
| XP_009689260.1 | 0.0864693  | 0.92109     | 0.0938771    | 0.0689561  | 0.746894    | 0.0923238    | 0.0931    | conserved hypothetical protein                            |
| XP_009689261.1 | 0.0242496  | 0.933401    | 0.0259798    | 0.0191568  | 0.877762    | 0.0218246    | 0.023902  | U4/U6 small nuclear ribonucleoprotein                     |
| XP_009689262.1 | 0.0615283  | 0.813839    | 0.0756026    | 0.0531283  | 0.676812    | 0.0784979    | 0.07705   | uncharacterized protein                                   |
| XP_009689263.1 | 0.0108324  | 0.462393    | 0.0234268    | 0.00717339 | 0.588477    | 0.0121897    | 0.017808  | uncharacterized protein                                   |
| XP_009689264.1 | 0.0519628  | 0.507343    | 0.102422     | 0.0536885  | 0.4936      | 0.108769     | 0.105596  | UDP-N-acetylglucosamine pyrophosphorylase                 |
| XP_009689265.1 | 0.041948   | 0.504137    | 0.0832075    | 0.0428401  | 0.525604    | 0.0815065    | 0.082357  | conserved hypothetical protein                            |
| XP_009689266.1 | 0.0666429  | 0.841163    | 0.0792271    | 0.0657893  | 0.828153    | 0.079441     | 0.079334  | conserved hypothetical protein                            |
| XP_009689267.1 | 0.0197178  | 0.639014    | 0.0308566    | 0.0274969  | 0.587454    | 0.0468069    | 0.038832  | phosphoenolpyruvate carboxykinase                         |
| XP_009689268.1 | 0.0485863  | 0.58618     | 0.0828864    | 0.0473038  | 0.626342    | 0.0755238    | 0.079205  | exosome complex exonuclease rrp44                         |
| XP_009689269.1 | 0.0412697  | 0.993956    | 0.0415206    | 0.0616345  | 0.603911    | 0.102059     | 0.07179   | ribonucleoprotein                                         |
| XP_009689270.1 | 0.0419638  | 0.589926    | 0.071134     | 0.0253354  | 0.512014    | 0.0494818    | 0.060308  | uncharacterized protein                                   |
| XP_009689271.1 | 0.101278   | 0.621082    | 0.163068     | 0.129372   | 0.694843    | 0.186189     | 0.174628  | conserved hypothetical protein                            |
| XP_009689272.1 | 0.0333602  | 0.422884    | 0.0788873    |            |             |              | 0.0788873 | conserved hypothetical protein                            |
| XP_009689274.1 | 0.0896511  | 0.419559    | 0.21368      | 0.0293857  | 0.35411     | 0.0829846    | 0.148332  | conserved hypothetical protein                            |
| XP_009689276.1 | 0.0252904  | 0.769958    | 0.0328465    | 0.0193343  | 0.93499     | 0.0206786    | 0.026763  | myosin a                                                  |
| XP_009689278.1 |            |             |              | 0.0891823  | 0.40558     | 0.219888     | 0.219888  | conserved hypothetical protein                            |
| XP_009689279.1 | 0.127471   | 0.259632    | 0.49097      | 0.111018   | 0.243952    | 0.455082     | 0.473026  | conserved hypothetical protein                            |



| protein_id     | Chitose_ka  | Chitose_ks | Chitose_kaks | Buffeli_ka  | Buffeli_ks | Buffeli_kaks | mean_kaks | function                                      |
|----------------|-------------|------------|--------------|-------------|------------|--------------|-----------|-----------------------------------------------|
| XP_009689280.1 | 0.102569    | 0.359183   | 0.285563     | 0.119787    | 0.313267   | 0.38238      | 0.333971  | conserved hypothetical protein                |
| XP_009689282.1 | 0.0644058   | 0.490996   | 0.131174     |             |            |              | 0.131174  | uncharacterized protein                       |
| XP_009689283.1 | 0.000497503 | 0.497503   | 0.001        | 0.000460579 | 0.460579   | 0.001        | 0.001     | ribosomal protein S15                         |
| XP_009689284.1 | 0.0668005   | 0.456379   | 0.146371     |             |            |              | 0.146371  | uncharacterized protein                       |
| XP_009689285.1 | 0.0590209   | 0.529702   | 0.111423     | 0.0608299   | 0.515344   | 0.118037     | 0.11473   | uncharacterized protein                       |
| XP_009689286.1 | 0.0858528   | 0.525392   | 0.163407     | 0.0770596   | 0.635504   | 0.121257     | 0.142332  | ribosomal protein S12                         |
| XP_009689287.1 | 0.0156049   | 0.299252   | 0.0521461    |             |            |              | 0.0521461 | uncharacterized protein                       |
| XP_009689288.1 | 0.0228299   | 0.927376   | 0.0246177    | 0.0180206   | 0.697289   | 0.0258438    | 0.025231  | DNA replication licensing factor Mcm2         |
| XP_009689289.1 | 0.0101957   | 0.396042   | 0.025744     | 0.00757094  | 0.276218   | 0.0274093    | 0.026577  | ubiquitin carrier protein                     |
| XP_009689290.1 | 0.0457773   | 0.423238   | 0.10816      | 0.0382302   | 0.459212   | 0.0832516    | 0.095706  | conserved hypothetical protein                |
| XP_009689291.1 | 0.0568199   | 0.384165   | 0.147905     |             |            |              | 0.147905  | conserved hypothetical protein                |
| XP_009689292.1 | 0.0536567   | 0.918002   | 0.0584495    | 0.0547575   | 0.878179   | 0.0623534    | 0.060401  | uncharacterized protein                       |
| XP_009689296.1 | 0.280416    | 0.0648331  | 4.32521      |             |            |              | 4.32521   | hypothetical protein                          |
| XP_009689297.1 | 0.0347593   | 0.338464   | 0.102697     |             |            |              | 0.102697  | conserved hypothetical protein                |
| XP_009689298.1 | 0.112288    | 0.437287   | 0.256782     | 0.0801075   | 0.656655   | 0.121993     | 0.189388  | conserved hypothetical protein                |
| XP_009689299.1 | 0.111019    | 0.478467   | 0.23203      | 0.114777    | 0.448079   | 0.256154     | 0.244092  | uncharacterized protein                       |
| XP_009689300.1 | 0.182547    | 0.268684   | 0.67941      |             |            |              | 0.67941   | hypothetical protein                          |
| XP_009689301.1 | 0.0885254   | 0.628271   | 0.140903     |             |            |              | 0.140903  | ABC transporter                               |
| XP_009689302.1 | 0.00292378  | 0.140947   | 0.0207437    |             |            |              | 0.0207437 | transcription factor                          |
| XP_009689303.1 | 0.10439     | 0.510181   | 0.204614     | 0.0930466   | 0.690181   | 0.134815     | 0.169714  | conserved hypothetical protein                |
| XP_009689304.1 | 0.128509    | 1.09171    | 0.117713     |             |            |              | 0.117713  | uncharacterized protein                       |
| XP_009689305.1 | 0.114359    | 0.510299   | 0.224102     | 0.117079    | 0.555794   | 0.210652     | 0.217377  | uncharacterized protein                       |
| XP_009689307.1 | 0.102162    | 0.357905   | 0.285445     | 0.0905559   | 0.280898   | 0.32238      | 0.303913  | uncharacterized protein                       |
| XP_009689308.1 | 0.126519    | 0.651205   | 0.194285     | 0.105226    | 0.452254   | 0.232671     | 0.213478  | uncharacterized protein                       |
| XP_009689309.1 | 0.0251286   | 0.500686   | 0.0501882    | 0.0248255   | 0.305699   | 0.0812089    | 0.065699  | conserved transmembrane protein               |
| XP_009689310.1 | 0.190792    | 0.386409   | 0.493757     |             |            |              | 0.493757  | conserved hypothetical protein                |
| XP_009689311.1 | 0.0964097   | 0.445258   | 0.216525     | 0.13449     | 0.800628   | 0.167981     | 0.192253  | uncharacterized protein                       |
| XP_009689312.1 | 0.0844993   | 0.846932   | 0.099771     | 0.0745399   | 0.823033   | 0.0905673    | 0.095169  | conserved hypothetical protein                |
| XP_009689313.1 | 0.070879    | 0.333867   | 0.212297     | 0.0420963   | 0.279083   | 0.150838     | 0.181567  | conserved hypothetical protein                |
| XP_009689314.1 | 0.0874288   | 0.544345   | 0.160613     | 0.113332    | 0.529372   | 0.214088     | 0.187351  | uncharacterized protein                       |
| XP_009689315.1 | 0.048649    | 0.04455    | 1.09201      |             |            |              | 1.09201   | hypothetical protein                          |
| XP_009689316.1 | 0.0054828   | 0.763122   | 0.0071847    | 0.00556763  | 0.917661   | 0.0060672    | 0.006626  | elongation factor 2                           |
| XP_009689317.1 | 0.0342715   | 0.329738   | 0.103935     |             |            |              | 0.103935  | conserved hypothetical protein                |
| XP_009689318.1 | 0.0675397   | 0.756322   | 0.0893002    | 0.062725    | 0.849516   | 0.0738361    | 0.081568  | silent information regulator protein Sir2     |
| XP_009689319.1 | 0.0202754   | 0.91       | 0.0222807    | 0.010186    | 0.279867   | 0.0363959    | 0.029338  | uncharacterized protein                       |
| XP_009689320.1 | 0.0106487   | 0.171345   | 0.0621478    |             |            |              | 0.0621478 | SprA protein                                  |
| XP_009689321.1 | 0.110322    | 0.405643   | 0.271969     |             |            |              | 0.271969  | conserved hypothetical protein                |
| XP_009689322.1 | 0.0640496   | 0.363431   | 0.176236     | 0.0640485   | 0.39144    | 0.163623     | 0.16993   | uncharacterized protein                       |
| XP_009689323.1 | 0.003746    | 0.0370452  | 0.10112      | 0.0102311   | 0.156059   | 0.0655588    | 0.083339  | uncharacterized protein                       |
| XP_009689324.1 | 0.0486835   | 0.419592   | 0.116026     | 0.0403959   | 0.388183   | 0.104064     | 0.110045  | long-chain-fatty-acid--CoA ligase 5           |
| XP_009689325.1 | 0.082834    | 0.613739   | 0.134966     |             |            |              | 0.134966  | conserved hypothetical protein                |
| XP_009689326.1 | 0.0518286   | 0.409656   | 0.126517     | 0.0368475   | 0.400292   | 0.0920515    | 0.109284  | conserved hypothetical protein                |
| XP_009689327.1 | 0.0725545   | 0.482536   | 0.150361     |             |            |              | 0.150361  | conserved hypothetical protein                |
| XP_009689330.1 | 0.0302974   | 0.44589    | 0.0679482    | 0.0320992   | 0.4503     | 0.0712841    | 0.069616  | tryptophanyl-tRNA synthetase                  |
| XP_009689331.1 | 0.03046     | 0.246011   | 0.123816     | 0.0379222   | 0.249517   | 0.151982     | 0.137899  | uncharacterized protein                       |
| XP_009689332.1 | 0.0763685   | 0.394259   | 0.193701     | 0.0880793   | 0.484166   | 0.18192      | 0.18781   | 1-deoxy-D-xylulose-5-phosphate synthase       |
| XP_009689333.1 | 0.0327878   | 0.219278   | 0.149526     |             |            |              | 0.149526  | uncharacterized protein                       |
| XP_009689334.1 | 0.0788064   | 0.430086   | 0.183234     | 0.079331    | 0.320855   | 0.247248     | 0.215241  | uncharacterized protein                       |
| XP_009689335.1 | 0.0389006   | 0.304718   | 0.127661     | 0.0231767   | 0.182768   | 0.126809     | 0.127235  | myosin a tail domain interacting protein mtip |
| XP_009689336.1 | 0.00485733  | 0.110131   | 0.0441052    | 7.46306E-05 | 0.0746306  | 0.001        | 0.022553  | conserved hypothetical protein                |
| XP_009689338.1 | 0.114971    | 0.414443   | 0.27741      |             |            |              | 0.27741   | conserved hypothetical protein                |
| XP_009689339.1 | 0.0720161   | 0.992678   | 0.0725473    | 0.0697168   | 1.12529    | 0.0619545    | 0.067251  | conserved hypothetical protein                |
| XP_009689341.1 | 0.0244678   | 0.568706   | 0.0430237    | 0.0254979   | 0.449383   | 0.0567399    | 0.049882  | ATP-dependent helicase                        |

| protein_id     | Chitose_ka | Chitose_ks | Chitose_kaks | Buffeli_ka | Buffeli_ks | Buffeli_kaks | mean_kaks | function                          |
|----------------|------------|------------|--------------|------------|------------|--------------|-----------|-----------------------------------|
| XP_009689342.1 | 0.0828914  | 0.603178   | 0.137424     | 0.0840627  | 0.57846    | 0.145322     | 0.141373  | uncharacterized protein           |
| XP_009689343.1 | 0.0229555  | 0.355901   | 0.0644997    | 0.0134397  | 0.463846   | 0.0289745    | 0.046737  | choline kinase                    |
| XP_009689344.1 | 0.0733711  | 0.355113   | 0.206613     | 0.0619164  | 0.362028   | 0.171027     | 0.18882   | choline kinase                    |
| XP_009689345.1 | 0.0790308  | 0.842766   | 0.0937754    | 0.0684196  | 0.916959   | 0.0746157    | 0.084196  | conserved hypothetical protein    |
| XP_009689346.1 | 0.057606   | 0.559529   | 0.102954     | 0.0490294  | 0.516974   | 0.0948391    | 0.098897  | transcription elongation factor   |
| XP_009689347.1 | 0.0537271  | 0.470364   | 0.114224     | 0.0629889  | 0.426785   | 0.147589     | 0.130907  | conserved hypothetical protein    |
| XP_009689348.1 | 0.0878437  | 0.568322   | 0.154567     | 0.0684418  | 0.680069   | 0.100639     | 0.127603  | hypothetical protein              |
| XP_009689349.1 | 0.0121938  | 0.279501   | 0.043627     | 0.0216333  | 0.315618   | 0.0685427    | 0.056085  | uncharacterized protein           |
| XP_009689350.1 | 0.0763797  | 0.434679   | 0.175715     | 0.0658323  | 0.377671   | 0.174311     | 0.175013  | conserved hypothetical protein    |
| XP_009689352.1 | 0.122105   | 0.485792   | 0.251353     | 0.145461   | 0.643664   | 0.225989     | 0.238671  | uncharacterized protein           |
| XP_009689353.1 | 0.112766   | 0.189295   | 0.595718     | 0.0638901  | 0.103174   | 0.619247     | 0.607482  | hypothetical protein              |
| XP_009689355.1 | 0.0545147  | 1.11377    | 0.0489459    | 0.0560361  | 1.17154    | 0.0478312    | 0.048389  | uncharacterized protein           |
| XP_009689356.1 | 0.146307   | 0.37872    | 0.38632      | 0.132613   | 0.409456   | 0.323877     | 0.355098  | conserved hypothetical protein    |
| XP_009689357.1 | 0.00927044 | 0.848111   | 0.0109307    | 0.0099304  | 1.16701    | 0.00850926   | 0.00972   | ribosomal protein L3              |
| XP_009689358.1 | 0.132168   | 1.79401    | 0.0736714    |            |            |              | 0.0736714 | hypothetical protein              |
| XP_009689359.1 | 0.138722   | 0.721835   | 0.19218      | 0.127762   | 0.648883   | 0.196895     | 0.194537  | conserved hypothetical protein    |
| XP_009689361.1 | 0.14862    | 0.44004    | 0.337743     | 0.175649   | 0.471441   | 0.372579     | 0.355161  | uncharacterized protein           |
| XP_009689362.1 | 0.100642   | 0.859273   | 0.117124     | 0.070748   | 0.910372   | 0.0777132    | 0.097419  | uncharacterized protein           |
| XP_009689363.1 | 0.0485344  | 0.46964    | 0.103344     | 0.0439766  | 0.315906   | 0.139208     | 0.121276  | uncharacterized protein           |
| XP_009689364.1 | 0.0908307  | 0.358935   | 0.253056     | 0.0458288  | 0.1993     | 0.229949     | 0.241503  | uncharacterized protein           |
| XP_009689366.1 |            |            |              | 0.0607109  | 0.769697   | 0.0788764    | 0.0788764 | uncharacterized protein           |
| XP_009689367.1 | 0.0927474  | 0.0731567  | 1.26779      | NA         | NA         | NA           | NA        | hypothetical protein              |
| XP_009689368.1 | 0.0808966  | 0.290557   | 0.278419     | 0.0752901  | 0.240971   | 0.312445     | 0.295432  | DHHC-containing protein 20        |
| XP_009689369.1 | 0.0852717  | 0.32281    | 0.264154     | 0.0869226  | 0.40373    | 0.215299     | 0.239727  | uncharacterized protein           |
| XP_009689370.1 | 0.0677167  | 0.664395   | 0.101922     | 0.0874117  | 0.73512    | 0.118908     | 0.110415  | conserved hypothetical protein    |
| XP_009689371.1 | 0.0266218  | 0.446615   | 0.0596079    | 0.064311   | 0.564103   | 0.114006     | 0.086807  | conserved hypothetical protein    |
| XP_009689372.1 | 0.0984888  | 0.276123   | 0.356685     | 0.112637   | 0.391293   | 0.287858     | 0.322271  | conserved hypothetical protein    |
| XP_009689373.1 | 0.13402    | 0.398851   | 0.336015     | 0.146842   | 0.562389   | 0.261103     | 0.298559  | uncharacterized protein           |
| XP_009689374.1 | 0.0722847  | 0.42858    | 0.168661     |            |            |              | 0.168661  | hypothetical protein              |
| XP_009689375.1 | 0.0225167  | 0.439625   | 0.0512181    | 0.00134098 | 0.232637   | 0.00576428   | 0.028491  | secretory protein                 |
| XP_009689376.1 | 0.0152783  | 0.252926   | 0.0604062    | 0.00546665 | 0.304286   | 0.0179655    | 0.039186  | proteasome subunit alpha type 5-2 |
| XP_009689377.1 | 0.152489   | 0.478448   | 0.318715     | 0.153605   | 0.525395   | 0.29236      | 0.305538  | conserved hypothetical protein    |
| XP_009689378.1 | 0.149569   | 0.491366   | 0.304393     | 0.0913911  | 0.208913   | 0.437459     | 0.370926  | conserved hypothetical protein    |
| XP_009689379.1 | 0.138789   | 0.430877   | 0.322109     | 0.116937   | 0.518456   | 0.225549     | 0.273829  | conserved hypothetical protein    |
| XP_009689380.1 | 0.0248828  | 0.470299   | 0.0529086    | 0.0363479  | 0.48851    | 0.0744056    | 0.063657  | uncharacterized protein           |
| XP_009689381.1 | 0.103649   | 0.558389   | 0.185621     | 0.0819782  | 0.51965    | 0.157757     | 0.171689  | uncharacterized protein           |
| XP_009689383.1 | 0.122573   | 0.548456   | 0.223488     | 0.112327   | 0.495749   | 0.22658      | 0.225034  | conserved hypothetical protein    |
| XP_009689384.1 | 0.0952482  | 0.613645   | 0.155217     | 0.0745952  | 0.423826   | 0.176004     | 0.16561   | uncharacterized protein           |
| XP_009689385.1 | 0.0670751  | 0.639932   | 0.104816     | 0.0797492  | 0.699138   | 0.114068     | 0.109442  | conserved hypothetical protein    |
| XP_009689386.1 | 0.0909141  | 0.382734   | 0.237538     |            |            |              | 0.237538  | uncharacterized protein           |
| XP_009689387.1 |            |            |              | NA         | NA         | NA           | NA        | hypothetical protein              |
| XP_009689388.1 | 0.146724   | 0.584364   | 0.251083     |            |            |              | 0.251083  | conserved hypothetical protein    |
| XP_009689390.1 | 0.110531   | 0.829546   | 0.133243     | 0.103704   | 0.74336    | 0.139507     | 0.136375  | uncharacterized protein           |
| XP_009689391.1 | 0.00944265 | 0.597899   | 0.0157931    | 0.00928851 | 0.616744   | 0.0150606    | 0.015427  | conserved hypothetical protein    |
| XP_009689393.1 | 0.0336881  | 0.800186   | 0.0421004    | 0.0304317  | 0.880536   | 0.0345604    | 0.03833   | DEAD-box helicase                 |
| XP_009689395.1 | 0.252031   | 0.205609   | 1.22578      | 0.211869   | 0.183629   | 1.15379      | 1.189785  | hypothetical protein              |
| XP_009689396.1 | 0.206303   | 0.296661   | 0.695417     |            |            |              | 0.695417  | hypothetical protein              |
| XP_009689397.1 | 0.088411   | 0.346517   | 0.255142     | 0.0860647  | 0.536518   | 0.160413     | 0.207778  | conserved hypothetical protein    |
| XP_009689398.1 | 0.0239361  | 0.770432   | 0.0310684    | 0.0293981  | 0.907054   | 0.0324105    | 0.031739  | splicing factor                   |
| XP_009689399.1 | 0.0747237  | 0.253505   | 0.294762     | 0.0730016  | 0.412246   | 0.177083     | 0.235923  | uncharacterized protein           |
| XP_009689400.1 | 0.0817045  | 0.382712   | 0.213488     | 0.0723728  | 0.450113   | 0.160788     | 0.187138  | uncharacterized protein           |
| XP_009689403.1 | 0.0213301  | 1.05945    | 0.0201331    | 0.0242122  | 0.850822   | 0.0284574    | 0.024295  | trehalose-6-phosphate synthase    |
| XP_009689404.1 | 0.0250175  | 0.169296   | 0.147774     | 0.0118419  | 0.139721   | 0.0847542    | 0.116264  | conserved hypothetical protein    |

| protein_id     | Chitose_ka  | Chitose_ks | Chitose_kaks | Buffeli_ka  | Buffeli_ks | Buffeli_kaks | mean_kaks | function                                     |
|----------------|-------------|------------|--------------|-------------|------------|--------------|-----------|----------------------------------------------|
| XP_009689405.1 | 0.10326     | 0.323231   | 0.319462     | 0.115552    | 0.296492   | 0.38973      | 0.354596  | uncharacterized protein                      |
| XP_009689406.1 | 0.0184812   | 0.427652   | 0.0432155    | 0.012519    | 0.490326   | 0.025532     | 0.034374  | uncharacterized protein                      |
| XP_009689407.1 | 0.0912293   | 0.472387   | 0.193124     | 0.0623456   | 0.518181   | 0.120316     | 0.15672   | uncharacterized protein                      |
| XP_009689408.1 | 0.120606    | 0.420816   | 0.2866       | 0.129252    | 0.472767   | 0.273394     | 0.279997  | NEDD8-activating enzyme E1 catalytic subunit |
| XP_009689409.1 | 0.210249    | 0.144473   | 1.45528      | 0.174504    | 0.12987    | 1.34368      | 1.39948   | hypothetical protein                         |
| XP_009689410.1 | 0.116746    | 0.614121   | 0.190102     | 0.0895513   | 0.435976   | 0.205404     | 0.197753  | conserved hypothetical protein               |
| XP_009689411.1 | 0.0965327   | 0.209613   | 0.460529     |             |            |              | 0.460529  | hypothetical protein                         |
| XP_009689412.1 | 0.051456    | 0.317886   | 0.16187      | 0.0457614   | 0.314396   | 0.145554     | 0.153712  | uncharacterized protein                      |
| XP_009689413.1 | 0.0388446   | 0.250842   | 0.154857     |             |            |              | 0.154857  | conserved hypothetical protein               |
| XP_009689414.1 | 0.0430723   | 0.30536    | 0.141054     | 0.107983    | 0.382158   | 0.282562     | 0.211808  | conserved hypothetical protein               |
| XP_009689415.1 | 0.108234    | 0.70398    | 0.153746     | 0.088367    | 0.723489   | 0.12214      | 0.137943  | uncharacterized protein                      |
| XP_009689416.1 | 0.0050441   | 0.407262   | 0.0123854    |             |            |              | 0.0123854 | transcription initiation factor              |
| XP_009689417.1 | 0.0924429   | 0.506022   | 0.182686     | 0.11207     | 0.616972   | 0.181645     | 0.182165  | conserved hypothetical protein               |
| XP_009689419.1 | 0.0191402   | 0.0726012  | 0.263634     |             |            |              | 0.263634  | hypothetical protein                         |
| XP_009689420.1 | 0.0549334   | 0.469647   | 0.116967     | 0.0563604   | 0.479728   | 0.117484     | 0.117226  | uncharacterized protein                      |
| XP_009689421.1 | 0.0434002   | 0.69327    | 0.0626022    | 0.0587743   | 0.657286   | 0.0894196    | 0.076011  | adenylate kinase                             |
| XP_009689422.1 | 0.0258623   | 0.381583   | 0.0677763    |             |            |              | 0.0677763 | diphthine synthase                           |
| XP_009689423.1 | 0.0536913   | 0.443702   | 0.121008     | 0.0169463   | 0.211002   | 0.0803136    | 0.100661  | uncharacterized protein                      |
| XP_009689424.1 | 0.0609721   | 0.370979   | 0.164355     | 0.0628057   | 0.229873   | 0.273219     | 0.218787  | uncharacterized protein                      |
| XP_009689425.1 | 0.0155321   | 0.38175    | 0.0406866    | 0.0492553   | 0.324565   | 0.151758     | 0.096222  | elongation factor                            |
| XP_009689426.1 | 0.0372335   | 0.172473   | 0.21588      | 0.0191404   | 0.0833091  | 0.229752     | 0.222816  | Rab5 GTPase                                  |
| XP_009689427.1 | 0.0289648   | 0.714304   | 0.0405496    | 0.0259208   | 0.637063   | 0.040688     | 0.040619  | DEAD-box family helicase                     |
| XP_009689428.1 | 0.000331663 | 0.331663   | 0.001        | 0.00030942  | 0.30942    | 0.001        | 0.001     | Dim1 protein                                 |
| XP_009689429.1 | 0.0696543   | 0.674435   | 0.103278     | 0.0713415   | 1.0416     | 0.0684921    | 0.085885  | conserved hypothetical protein               |
| XP_009689430.1 | 0.155553    | 0.574846   | 0.2706       | 0.0900976   | 0.25766    | 0.349676     | 0.310138  | hypothetical protein                         |
| XP_009689431.1 | 0.0282932   | 0.327536   | 0.0863818    | 0.0465993   | 0.433642   | 0.10746      | 0.096921  | conserved hypothetical protein               |
| XP_009689432.1 | 0.0522896   | 0.691957   | 0.0755677    | 0.0486969   | 0.596475   | 0.0816412    | 0.078604  | conserved hypothetical protein               |
| XP_009689433.1 | 0.058564    | 0.444091   | 0.131874     | 0.0650251   | 0.492734   | 0.131968     | 0.131921  | uncharacterized protein                      |
| XP_009689434.1 | 0.0646259   | 0.508474   | 0.127098     | 0.0678817   | 0.39081    | 0.173695     | 0.150396  | uncharacterized protein                      |
| XP_009689435.1 | 0.148185    | 0.319203   | 0.464235     |             |            |              | 0.464235  | conserved hypothetical protein               |
| XP_009689436.1 | 0.0327384   | 0.118114   | 0.277176     |             |            |              | 0.277176  | conserved hypothetical protein               |
| XP_009689437.1 | 0.0453446   | 0.224986   | 0.201544     |             |            |              | 0.201544  | hypothetical protein                         |
| XP_009689438.1 | 0.0607093   | 0.129232   | 0.469771     | 0.0602512   | 0.310459   | 0.194071     | 0.331921  | conserved hypothetical protein               |
| XP_009689439.1 | 0.00373558  | 0.24036    | 0.0155416    |             |            |              | 0.0155416 | DNA-directed RNA polymerase III              |
| XP_009689440.1 | 0.10313     | 0.40798    | 0.252781     | 0.0867777   | 0.417601   | 0.2078       | 0.230291  | hypothetical protein                         |
| XP_009689441.1 | 0.000414046 | 0.414046   | 0.001        | 0.000457395 | 0.457395   | 0.001        | 0.001     | 40S ribosomal protein S25                    |
| XP_009689442.1 | 0.0758416   | 0.584179   | 0.129826     | 0.0102253   | 0.0583603  | 0.175211     | 0.152519  | uncharacterized protein                      |
| XP_009689443.1 | 0.0683658   | 0.435538   | 0.156969     | 0.0664312   | 0.265901   | 0.249834     | 0.203402  | uncharacterized protein                      |
| XP_009689444.1 | 0.10855     | 0.369493   | 0.29378      | 0.0903115   | 0.389749   | 0.231717     | 0.262748  | conserved hypothetical protein               |
| XP_009689445.1 | 0.0926305   | 0.371411   | 0.249401     |             |            |              | 0.249401  | conserved hypothetical protein               |
| XP_009689446.1 | 0.092899    | 0.769242   | 0.120767     |             |            |              | 0.120767  | hypothetical protein                         |
| XP_009689447.1 | 0.0641554   | 0.342706   | 0.187202     | 0.0811001   | 0.288641   | 0.280972     | 0.234087  | uncharacterized protein                      |
| XP_009689448.1 | 0.0339622   | 0.0860936  | 0.394481     | 0.00801968  | 0.0493382  | 0.162545     | 0.278513  | hypothetical protein                         |
| XP_009689449.1 | 0.00846943  | 0.972102   | 0.00871249   | 0.00777732  | 1.76723    | 0.00440085   | 0.006557  | conserved hypothetical protein               |
| XP_009689450.1 |             |            |              | 0.173667    | 1.13403    | 0.153142     | 0.153142  | ABC transporter                              |
| XP_009689453.1 | 0.125043    | 0.311057   | 0.401994     | 0.0836965   | 0.201255   | 0.415873     | 0.408934  | conserved hypothetical protein               |
| XP_009689454.1 | 0.0672387   | 0.569347   | 0.118098     | 0.0618341   | 0.510346   | 0.121161     | 0.119629  | glycerophosphoryl diester phosphodiesterase  |
| XP_009689455.1 | 0.0233059   | 0.7106     | 0.0327975    | 0.0244274   | 0.658093   | 0.0371185    | 0.034958  | adaptor protein                              |
| XP_009689456.1 | 0.116129    | 0.511774   | 0.226914     | 0.137329    | 0.666506   | 0.206044     | 0.216479  | conserved hypothetical protein               |
| XP_009689457.1 | 0.0935513   | 0.482493   | 0.193891     | 0.081219    | 0.409568   | 0.198304     | 0.196098  | conserved hypothetical protein               |
| XP_009689458.1 | 0.0456993   | 0.366395   | 0.124727     | 0.0313288   | 0.162125   | 0.193239     | 0.158983  | ribosomal protein S18                        |
| XP_009689459.1 | 0.061686    | 0.723472   | 0.0852639    | 0.0594793   | 0.721558   | 0.0824317    | 0.083848  | uncharacterized protein                      |
| XP_009689460.1 | 0.0592191   | 0.298669   | 0.198277     | 0.0318047   | 0.127234   | 0.249971     | 0.224124  | molecular chaperone DnaJ                     |

| protein_id     | Chitose_ka  | Chitose_ks | Chitose_kaks | Buffeli_ka  | Buffeli_ks | Buffeli_kaks | mean_kaks | function                                                |
|----------------|-------------|------------|--------------|-------------|------------|--------------|-----------|---------------------------------------------------------|
| XP_009689461.1 | 0.0805836   | 0.366917   | 0.219623     | 0.0418011   | 0.336612   | 0.124182     | 0.171903  | minichromosome maintenance protein                      |
| XP_009689462.1 | 0.0859435   | 0.483239   | 0.177849     | 0.081352    | 0.505049   | 0.161077     | 0.169463  | flavin-containing amine oxidase                         |
| XP_009689463.1 | 0.0124958   | 0.41434    | 0.0301584    | 0.013656    | 0.484444   | 0.0281891    | 0.029174  | DNA replication licensing factor                        |
| XP_009689464.1 | 0.0060093   | 0.517066   | 0.0116219    | 0.000808496 | 0.808496   | 0.001        | 0.006311  | ubiquitin                                               |
| XP_009689465.1 | 0.0368735   | 0.812792   | 0.0453664    | 0.0364337   | 0.918407   | 0.0396706    | 0.042519  | cation ATPase                                           |
| XP_009689466.1 | 0.0705269   | 0.415597   | 0.1697       | 0.0468372   | 0.302278   | 0.154948     | 0.162324  | conserved hypothetical protein                          |
| XP_009689467.1 | 0.0826847   | 0.480329   | 0.172142     |             |            |              | 0.172142  | uncharacterized protein                                 |
| XP_009689468.1 | 0.0340792   | 0.67639    | 0.0503839    | 0.0140117   | 0.979072   | 0.0143112    | 0.032348  | 30S ribosomal protein S16                               |
| XP_009689469.1 | 0.152663    | 0.552526   | 0.276299     | 0.12662     | 0.517256   | 0.244792     | 0.260545  | conserved hypothetical protein                          |
| XP_009689470.1 | 0.0910468   | 0.356182   | 0.255619     | 0.0494121   | 0.227034   | 0.217642     | 0.23663   | conserved hypothetical protein                          |
| XP_009689471.1 | 0.0040243   | 0.910436   | 0.00442019   | 0.00505822  | 0.734275   | 0.00688872   | 0.005654  | clathrin-adaptor chain                                  |
| XP_009689472.1 | 0.000458576 | 0.458576   | 0.001        | 0.000195793 | 0.195793   | 0.001        | 0.001     | 26S proteasome subunit                                  |
| XP_009689473.1 | 0.0981901   | 0.623671   | 0.157439     | 0.104107    | 0.572728   | 0.181774     | 0.169606  | conserved hypothetical protein                          |
| XP_009689474.1 | 0.0323741   | 0.826567   | 0.039167     | 0.0246673   | 0.842677   | 0.0292726    | 0.03422   | 26S proteasome regulatory subunit                       |
| XP_009689475.1 | 0.110363    | 0.665348   | 0.165873     | 0.0987434   | 0.733038   | 0.134704     | 0.150288  | uncharacterized protein                                 |
| XP_009689476.1 | 0.0362395   | 0.364147   | 0.099519     | 0.0328741   | 0.192355   | 0.170904     | 0.135211  | uncharacterized protein                                 |
| XP_009689477.1 | 0.0495047   | 0.5774     | 0.0857373    | 0.0493554   | 0.514824   | 0.0958686    | 0.090803  | molecular chaperone protein                             |
| XP_009689478.1 | 0.0555797   | 0.337465   | 0.164698     | 0.0470518   | 0.321577   | 0.146316     | 0.155507  | uncharacterized protein                                 |
| XP_009689479.1 | 0.0557967   | 1.07315    | 0.0519934    | 0.0493999   | 0.71061    | 0.0695176    | 0.060756  | uncharacterized protein                                 |
| XP_009689480.1 | 0.0597434   | 0.508882   | 0.117401     | 0.0495874   | 0.34232    | 0.144857     | 0.131129  | uncharacterized protein                                 |
| XP_009689481.1 | 0.101679    | 1.2028     | 0.0845353    | 0.0896458   | 1.12233    | 0.0798748    | 0.082205  | conserved hypothetical protein                          |
| XP_009689482.1 | 0.0354905   | 0.498579   | 0.0711834    |             |            |              | 0.0711834 | conserved hypothetical protein                          |
| XP_009689483.1 | 0.0789724   | 0.613765   | 0.128669     | 0.0677864   | 0.455165   | 0.148927     | 0.138798  | DEAD-box family helicase                                |
| XP_009689484.1 | 0.0627695   | 0.467315   | 0.134319     | 0.0457228   | 0.46818    | 0.0976605    | 0.11599   | uncharacterized protein                                 |
| XP_009689485.1 | 0.0868694   | 0.458819   | 0.189333     | 0.0627631   | 0.382957   | 0.163891     | 0.176612  | conserved hypothetical protein                          |
| XP_009689486.1 | 0.0172459   | 0.153902   | 0.112058     | 0.0479041   | 0.191813   | 0.249744     | 0.180901  | phosphotyrosyl phosphatase activator protein            |
| XP_009689487.1 | 0.0614181   | 0.732699   | 0.0838244    | 0.0617651   | 0.69245    | 0.0891979    | 0.086511  | uncharacterized protein                                 |
| XP_009689490.1 | 0.0320866   | 0.395571   | 0.0811146    | 0.0253512   | 0.236347   | 0.107263     | 0.094189  | uncharacterized protein                                 |
| XP_009689491.1 | 0.0821794   | 0.430392   | 0.190941     | 0.0816985   | 0.36758    | 0.22226      | 0.206601  | conserved hypothetical protein                          |
| XP_009689492.1 | 0.0493603   | 0.445418   | 0.110818     | 0.0525877   | 0.433465   | 0.12132      | 0.116069  | coatamer subunit beta                                   |
| XP_009689493.1 | 0.0530527   | 0.638577   | 0.0830796    | 0.0469204   | 0.503553   | 0.0931788    | 0.088129  | hypothetical protein                                    |
| XP_009689496.1 | 0.0425049   | 0.370728   | 0.114652     | 0.0678166   | 0.355268   | 0.190888     | 0.15277   | ribosomal protein L15                                   |
| XP_009689497.1 | 0.0654033   | 0.332913   | 0.196458     | 0.0325307   | 0.205377   | 0.158395     | 0.177426  | Plasmodium falciparum CPW-WPC repeat containing protein |
| XP_009689500.1 | 0.0184575   | 0.0850391  | 0.217047     |             |            |              | 0.217047  | conserved hypothetical protein                          |
| XP_009689503.1 | 0.0618498   | 0.125358   | 0.493387     |             |            |              | 0.493387  | hypothetical protein                                    |
| XP_009689505.1 | 0.0135912   | 0.324259   | 0.0419145    | 0.00835946  | 0.325007   | 0.0257209    | 0.033818  | cytochrome c oxidase subunit 2                          |
| XP_009689506.1 | 0.0331563   | 0.110532   | 0.299969     | 0.0305463   | 0.0840064  | 0.363619     | 0.331794  | 50S ribosomal protein L17                               |
| XP_009689507.1 | 0.0580183   | 0.48696    | 0.119144     | 0.0493312   | 0.498672   | 0.0989252    | 0.109035  | predicted protein                                       |
| XP_009689509.1 | 0.0725788   | 0.620266   | 0.117012     | 0.0590149   | 0.671784   | 0.087848     | 0.10243   | conserved hypothetical protein                          |
| XP_009689510.1 | 0.0546135   | 0.552823   | 0.0987902    | 0.0458047   | 0.504214   | 0.0908437    | 0.094817  | protein kinase                                          |
| XP_009689511.1 | 0.0473728   | 0.88866    | 0.0533081    | 0.0470254   | 0.725408   | 0.0648262    | 0.059067  | succinyl-Coa ligase%2C subunit                          |
| XP_009689512.1 | 0.0193611   | 0.210539   | 0.0919599    |             |            |              | 0.0919599 | uncharacterized protein                                 |
| XP_009689513.1 | 0.0117513   | 0.308162   | 0.0381336    | 0.0147178   | 0.307546   | 0.0478556    | 0.042995  | 60S ribosomal protein L14                               |
| XP_009689514.1 | 0.0766522   | 0.578307   | 0.132546     | 0.0992634   | 0.749722   | 0.1324       | 0.132473  | conserved hypothetical protein                          |
| XP_009689515.1 | 0.0754952   | 0.547688   | 0.137843     | 0.0837309   | 0.640656   | 0.130696     | 0.134269  | uncharacterized protein                                 |
| XP_009689517.1 | 0.0214344   | 0.377495   | 0.0567806    |             |            |              | 0.0567806 | uncharacterized protein                                 |
| XP_009689518.1 | 0.0866454   | 0.430001   | 0.201501     |             |            |              | 0.201501  | conserved hypothetical protein                          |
| XP_009689519.1 | 0.068916    | 0.573817   | 0.120101     | 0.0484102   | 0.497153   | 0.0973749    | 0.108738  | conserved hypothetical protein                          |
| XP_009689520.1 | 0.032404    | 0.635173   | 0.0510161    |             |            |              | 0.0510161 | hypothetical protein                                    |
| XP_009689521.1 | 0.0875759   | 0.469188   | 0.186654     | 0.0667114   | 0.440167   | 0.151559     | 0.169106  | conserved hypothetical protein                          |
| XP_009689522.1 | 0.0832524   | 0.623099   | 0.13361      | 0.0732224   | 0.523642   | 0.139833     | 0.136721  | conserved hypothetical protein                          |
| XP_009689523.1 | 0.049254    | 0.560206   | 0.0879212    | 0.0543517   | 0.627931   | 0.0865567    | 0.087239  | uncharacterized protein                                 |
| XP_009689524.1 | 0.0521743   | 0.34019    | 0.153368     | 0.067263    | 0.347888   | 0.193347     | 0.173357  | conserved hypothetical protein                          |

| protein_id     | Chitose_ka | Chitose_ks | Chitose_kaks | Buffeli_ka | Buffeli_ks | Buffeli_kaks | mean_kaks | function                                                                             |
|----------------|------------|------------|--------------|------------|------------|--------------|-----------|--------------------------------------------------------------------------------------|
| XP_009689525.1 | 0.0041386  | 0.438387   | 0.0094405    | 0.00923735 | 0.20151    | 0.0458407    | 0.027641  | ribonucleotide reductase R2 subunit/ribonucleoside-diphosphate reductase small chain |
| XP_009689526.1 | 0.00100834 | 0.655034   | 0.00153938   | 0.00197605 | 0.498128   | 0.00396696   | 0.002753  | elongation factor 1-alpha                                                            |
| XP_009689527.1 | 0.0406957  | 0.133009   | 0.305963     |            |            |              | 0.305963  | uncharacterized protein                                                              |
| XP_009689528.1 | 0.00152382 | 0.386829   | 0.00393925   | 0.00036624 | 0.36624    | 0.001        | 0.00247   | cell division control protein 2 homolog                                              |
| XP_009689529.1 | 0.0226857  | 0.267182   | 0.0849074    | 0.0370166  | 0.221091   | 0.167427     | 0.126167  | molecular chaperone DnaJ                                                             |
| XP_009689530.1 | 0.0376215  | 0.404627   | 0.092978     | 0.0312701  | 0.369205   | 0.0846958    | 0.088837  | uncharacterized protein                                                              |
| XP_009689531.1 | 0.0889988  | 0.788825   | 0.112825     | 0.0900788  | 0.836905   | 0.107633     | 0.110229  | uncharacterized protein                                                              |
| XP_009689532.1 | 0.0176962  | 0.282414   | 0.0626605    | 0.0145723  | 0.295312   | 0.0493455    | 0.056003  | ubiquitin carrier protein                                                            |
| XP_009689533.1 | 0.0117033  | 0.55217    | 0.0211951    | 0.018556   | 0.525393   | 0.0353184    | 0.028257  | mitochondrial inner membrane protein                                                 |
| XP_009689534.1 | 0.0796295  | 0.491341   | 0.162066     | 0.0480377  | 0.418327   | 0.114833     | 0.13845   | uncharacterized protein                                                              |
| XP_009689535.1 | 0.044347   | 0.175374   | 0.252871     |            |            |              | 0.252871  | uncharacterized protein                                                              |
| XP_009689536.1 | 0.130498   | 0.320298   | 0.407426     | 0.118946   | 0.253662   | 0.468917     | 0.438171  | conserved hypothetical protein                                                       |
| XP_009689537.1 | 0.107548   | 0.641369   | 0.167684     | 0.119532   | 0.418631   | 0.285531     | 0.226607  | conserved hypothetical protein                                                       |
| XP_009689538.1 | 0.111728   | 0.456802   | 0.244588     | 0.0989874  | 0.474219   | 0.208738     | 0.226663  | conserved hypothetical protein                                                       |
| XP_009689539.1 | 0.0188872  | 0.358911   | 0.0526236    |            |            |              | 0.0526236 | disrupter of silencing protein                                                       |
| XP_009689540.1 | 0.0411774  | 1.00382    | 0.0410207    | 0.0377514  | 0.997376   | 0.0378507    | 0.039436  | uncharacterized protein                                                              |
| XP_009689541.1 | 0.0488171  | 0.0800396  | 0.609912     |            |            |              | 0.609912  | conserved hypothetical protein                                                       |
| XP_009689542.1 | 0.0675852  | 0.421952   | 0.160173     | 0.0588839  | 0.489268   | 0.120351     | 0.140262  | conserved hypothetical protein                                                       |
| XP_009689543.1 | 0.075235   | 0.448956   | 0.167578     | 0.0567838  | 0.458946   | 0.123726     | 0.145652  | conserved hypothetical protein                                                       |
| XP_009689544.1 | 0.059638   | 0.579261   | 0.102955     | 0.0468551  | 0.563505   | 0.0831495    | 0.093052  | uncharacterized protein                                                              |
| XP_009689545.1 | 0.0380341  | 0.441191   | 0.0862078    | 0.0394493  | 0.383748   | 0.1028       | 0.094504  | uncharacterized protein                                                              |
| XP_009689546.1 | 0.0424072  | 0.700055   | 0.0605769    | 0.0327265  | 0.611405   | 0.0535268    | 0.057052  | ribonucleolar protein                                                                |
| XP_009689547.1 | 0.0827399  | 0.496201   | 0.166747     | 0.0702314  | 0.590678   | 0.1189       | 0.142823  | conserved hypothetical protein                                                       |
| XP_009689548.1 | 0.0491991  | 0.524459   | 0.0938093    | 0.0452673  | 0.457134   | 0.099024     | 0.096417  | histone acetyltransferase                                                            |
| XP_009689549.1 | 0.0330733  | 0.638849   | 0.0517702    | 0.0266495  | 0.559663   | 0.0476171    | 0.049694  | heat-shock protein                                                                   |
| XP_009689550.1 | 0.0153797  | 1.2405     | 0.012398     | 0.012192   | 1.25835    | 0.00968893   | 0.011043  | clathrin assembly protein                                                            |
| XP_009689551.1 | 0.0730691  | 0.609365   | 0.11991      | 0.0557253  | 0.497982   | 0.111902     | 0.115906  | conserved hypothetical protein                                                       |
| XP_009689552.1 | 0.0959115  | 0.586801   | 0.163448     | 0.0870797  | 0.575799   | 0.151233     | 0.15734   | uncharacterized protein                                                              |
| XP_009689553.1 | 0.00214626 | 0.244204   | 0.00878882   | 0.00270226 | 0.333196   | 0.00811013   | 0.008449  | uncharacterized protein                                                              |
| XP_009689554.1 | 0.0542725  | 0.415061   | 0.130758     | 0.0438757  | 0.448318   | 0.0978673    | 0.114313  | conserved hypothetical protein                                                       |
| XP_009689555.1 | 0.0751248  | 0.328292   | 0.228835     |            |            |              | 0.228835  | conserved hypothetical protein                                                       |
| XP_009689556.1 | 0.0512009  | 0.390775   | 0.131024     | 0.0525025  | 0.358877   | 0.146297     | 0.138661  | tyrosyl-tRNA synthetase                                                              |
| XP_009689557.1 | 0.0290082  | 0.428253   | 0.0677362    | 0.0202086  | 0.47721    | 0.0423473    | 0.055042  | conserved hypothetical protein                                                       |
| XP_009689558.1 | 0.084604   | 0.630758   | 0.134131     | 0.0721009  | 0.617421   | 0.116778     | 0.125454  | conserved hypothetical protein                                                       |
| XP_009689559.1 | 0.046928   | 0.501239   | 0.093624     | 0.0231062  | 0.320043   | 0.0721971    | 0.082911  | clathrin assembly protein                                                            |
| XP_009689560.1 | 0.00338415 | 0.500232   | 0.00676516   | 0.00347451 | 0.349235   | 0.00994891   | 0.008357  | eukaryotic translation initiation factor                                             |
| XP_009689561.1 | 0.0793105  | 0.434883   | 0.182372     | 0.0565188  | 0.297931   | 0.189704     | 0.186038  | conserved hypothetical protein                                                       |
| XP_009689562.1 | 0.074806   | 0.376776   | 0.198542     | 0.0356037  | 0.206975   | 0.172019     | 0.185281  | conserved hypothetical protein                                                       |
| XP_009689563.1 | 0.0750694  | 1.02613    | 0.0731577    | 0.0856546  | 0.840614   | 0.101895     | 0.087526  | uncharacterized protein                                                              |
| XP_009689564.1 | 0.0560284  | 0.19822    | 0.282657     | 0.054334   | 0.259284   | 0.209554     | 0.246105  | conserved hypothetical protein                                                       |
| XP_009689565.1 | 0.0385554  | 0.492437   | 0.0782952    | 0.0302107  | 0.65121    | 0.0463916    | 0.062343  | chromatin assembly factor subunit                                                    |
| XP_009689566.1 | 0.0323686  | 0.752209   | 0.0430314    | 0.0284104  | 0.67191    | 0.042283     | 0.042657  | myosin                                                                               |
| XP_009689568.1 | 0.0478812  | 0.691903   | 0.0692022    | 0.040771   | 0.65262    | 0.0624728    | 0.065838  | 1-phosphatidylinositol-4%2C5-bisphosphate phosphodiesterase                          |
| XP_009689569.1 | 0.0859329  | 0.648253   | 0.132561     | 0.0755881  | 0.504297   | 0.149888     | 0.141225  | conserved hypothetical protein                                                       |
| XP_009689570.1 | 0.0392915  | 0.101743   | 0.386184     |            |            |              | 0.386184  | conserved hypothetical protein                                                       |
| XP_009689571.1 | 0.0361744  | 0.524859   | 0.0689222    | 0.0528881  | 0.537783   | 0.0983448    | 0.083633  | conserved hypothetical protein                                                       |
| XP_009689572.1 | 0.0282604  | 0.462839   | 0.0610588    | 0.0127043  | 0.455836   | 0.0278704    | 0.044465  | transcriptional adaptor                                                              |
| XP_009689573.1 | 0.109003   | 0.316906   | 0.343962     | 0.0792955  | 0.340663   | 0.232768     | 0.288365  | conserved hypothetical protein                                                       |
| XP_009689577.1 | 0.0231085  | 0.399292   | 0.0578736    | 0.0310548  | 0.498181   | 0.0623363    | 0.060105  | cyclin-dependent kinase CRK3                                                         |
| XP_009689578.1 | 0.112585   | 0.186902   | 0.602374     | 0.0623029  | 0.187347   | 0.332553     | 0.467463  | hypothetical protein                                                                 |
| XP_009689579.1 | 0.0243626  | 0.469474   | 0.0518933    | 0.0162765  | 0.377585   | 0.0431069    | 0.0475    | uncharacterized protein                                                              |
| XP_009689581.1 | 0.0461842  | 0.615508   | 0.0750342    | 0.0424738  | 0.561695   | 0.0756172    | 0.075326  | uncharacterized protein                                                              |
| XP_009689582.1 | 0.0404252  | 0.561793   | 0.0719575    | 0.029667   | 0.604839   | 0.0490494    | 0.060503  | phosphomannomutase                                                                   |

| protein_id     | Chitose_ka | Chitose_ks | Chitose_kaks | Buffeli_ka  | Buffeli_ks | Buffeli_kaks | mean_kaks | function                                                |
|----------------|------------|------------|--------------|-------------|------------|--------------|-----------|---------------------------------------------------------|
| XP_009689583.1 | 0.065839   | 0.276614   | 0.238017     | 0.0609976   | 0.254298   | 0.239867     | 0.238942  | hypothetical protein                                    |
| XP_009689584.1 | 0.0756238  | 0.582243   | 0.129884     | 0.0833258   | 0.627143   | 0.132866     | 0.131375  | uncharacterized protein                                 |
| XP_009689585.1 | 0.0556239  | 0.529663   | 0.105018     | 0.0600836   | 0.585387   | 0.102639     | 0.103828  | uncharacterized protein                                 |
| XP_009689586.1 | 0.0053262  | 0.240771   | 0.0221214    | 0.000243567 | 0.243567   | 0.001        | 0.011561  | ribosomal protein L11                                   |
| XP_009689587.1 | 0.0247306  | 0.778185   | 0.0317798    | 0.0168906   | 0.746052   | 0.02264      | 0.02721   | actin                                                   |
| XP_009689588.1 | 0.0667163  | 0.495786   | 0.134567     | 0.043981    | 0.687492   | 0.0639731    | 0.09927   | conserved hypothetical protein                          |
| XP_009689589.1 | 0.0313162  | 0.351491   | 0.0890955    | 0.0260882   | 0.304332   | 0.0857227    | 0.087409  | uncharacterized protein                                 |
| XP_009689590.1 | 0.0457061  | 0.517815   | 0.0882672    | 0.0368418   | 0.486192   | 0.0757763    | 0.082022  | conserved hypothetical protein                          |
| XP_009689591.1 | 0.0245423  | 0.198493   | 0.123643     | 0.0473042   | 0.300666   | 0.157331     | 0.140487  | conserved hypothetical protein                          |
| XP_009689592.1 | 0.0404698  | 0.453706   | 0.0891982    | 0.0322148   | 0.40639    | 0.0792706    | 0.084234  | uncharacterized protein                                 |
| XP_009689593.1 | 0.0622947  | 0.447715   | 0.139139     | 0.0576715   | 0.415917   | 0.138661     | 0.1389    | conserved hypothetical protein                          |
| XP_009689594.1 | 0.0127379  | 0.607276   | 0.0209755    | 0.000904404 | 0.904404   | 0.001        | 0.010988  | conserved hypothetical protein                          |
| XP_009689595.1 | 0.0140046  | 0.616487   | 0.0227168    | 0.0070013   | 0.654374   | 0.0106992    | 0.016708  | pre-mRNA splicing factor                                |
| XP_009689596.1 | 0.082695   | 0.664108   | 0.12452      |             |            |              | 0.12452   | uncharacterized protein                                 |
| XP_009689597.1 | 0.0228409  | 0.342481   | 0.0666924    | 0.0211146   | 0.324582   | 0.0650516    | 0.065872  | conserved hypothetical protein                          |
| XP_009689598.1 | 0.00450324 | 0.575211   | 0.00782885   | 0.000683928 | 0.683928   | 0.001        | 0.004414  | mitochondrial import inner membrane translocase subunit |
| XP_009689599.1 | 0.0818362  | 0.590414   | 0.138608     | 0.0778047   | 0.524191   | 0.148428     | 0.143518  | conserved hypothetical protein                          |
| XP_009689600.1 | 0.0526246  | 0.475528   | 0.110666     | 0.0297671   | 0.322806   | 0.0922135    | 0.10144   | conserved hypothetical protein                          |
| XP_009689601.1 | 0.0320312  | 0.303462   | 0.105553     | 0.0351265   | 0.290208   | 0.121039     | 0.113296  | aspartyl protease                                       |
| XP_009689602.1 | 0.00613538 | 0.237897   | 0.02579      | 0.00283329  | 0.236855   | 0.0119621    | 0.018876  | ubiquitin carrier protein                               |
| XP_009689603.1 | 0.0156501  | 0.65228    | 0.0239929    | 0.015538    | 0.407682   | 0.0381131    | 0.031053  | recombinational repair protein                          |
| XP_009689604.1 | 0.00542716 | 0.452986   | 0.0119809    | 0.0131834   | 0.612475   | 0.0215247    | 0.016753  | uncharacterized protein                                 |
| XP_009689605.1 | 0.0733446  | 0.873132   | 0.0840018    | 0.0597845   | 0.600436   | 0.0995684    | 0.091785  | conserved hypothetical protein                          |
| XP_009689606.1 | 0.0412361  | 0.590671   | 0.0698123    | 0.0359671   | 0.809914   | 0.0444086    | 0.05711   | ubiquitination-mediated degradation component           |
| XP_009689607.1 | 0.0373817  | 0.830189   | 0.045028     | 0.0294322   | 0.81362    | 0.0361744    | 0.040601  | DNA-directed RNA polymerase                             |
| XP_009689608.1 | 0.0218775  | 0.532234   | 0.041105     | 0.0194937   | 0.522596   | 0.0373016    | 0.039203  | ADP-ribosylation factor GTPase activating protein       |
| XP_009689609.1 | 0.0551967  | 0.368726   | 0.149696     | 0.0358167   | 0.413202   | 0.0866808    | 0.118188  | uncharacterized protein                                 |
| XP_009689610.1 | 0.0291051  | 0.777967   | 0.0374118    | 0.0286267   | 0.990711   | 0.0288951    | 0.033153  | complexed with cef1p                                    |
| XP_009689611.1 | 0.0543355  | 0.710966   | 0.0764249    | 0.0673483   | 0.780319   | 0.0863086    | 0.081367  | uncharacterized protein                                 |
| XP_009689612.1 | 0.0205937  | 0.525737   | 0.0391711    | 0.0162051   | 0.446759   | 0.0362727    | 0.037722  | cyclophilin peptidyl-prolyl cis-trans isomerase protein |
| XP_009689613.1 | 0.0379556  | 0.230554   | 0.164627     | 0.0560241   | 0.379454   | 0.147644     | 0.156135  | conserved hypothetical protein                          |
| XP_009689614.1 | 0.0766221  | 0.369862   | 0.207164     | 0.100942    | 0.405801   | 0.248747     | 0.227955  | uncharacterized protein                                 |
| XP_009689615.1 | 0.0703224  | 0.543984   | 0.129273     | 0.0496136   | 0.353289   | 0.140434     | 0.134854  | uncharacterized protein                                 |
| XP_009689616.1 | 0.0307474  | 1.06873    | 0.0287701    | 0.0362605   | 1.03555    | 0.0350157    | 0.031893  | phosphatidylinositol 4-kinase                           |
| XP_009689617.1 | 0.0602769  | 0.69275    | 0.0870111    | 0.0525617   | 0.822645   | 0.0638935    | 0.075452  | conserved hypothetical protein                          |
| XP_009689618.1 | 0.0427297  | 0.475398   | 0.0898819    | 0.0413905   | 0.511425   | 0.0809317    | 0.085407  | DEAD-box family helicase                                |
| XP_009689619.1 | 0.0590731  | 0.698033   | 0.084628     | 0.061451    | 0.624943   | 0.0983307    | 0.091479  | conserved hypothetical protein                          |
| XP_009689620.1 | 0.0862431  | 0.347834   | 0.247943     | 0.0535068   | 0.293278   | 0.182444     | 0.215193  | uncharacterized protein                                 |
| XP_009689621.1 | 0.0977063  | 0.452804   | 0.21578      | 0.106161    | 0.455073   | 0.233283     | 0.224531  | conserved hypothetical protein                          |
| XP_009689622.1 | 0.0187172  | 0.551611   | 0.0339318    | 0.0129467   | 0.45287    | 0.0285882    | 0.03126   | uncharacterized protein                                 |
| XP_009689623.1 | 0.0170264  | 0.0886397  | 0.192086     | 0.00552237  | 0.0432905  | 0.127565     | 0.159826  | uncharacterized protein                                 |
| XP_009689624.1 | 0.0110106  | 0.542036   | 0.0203134    | 0.0124229   | 0.520271   | 0.0238777    | 0.022096  | nonsense-mediated mRNA decay protein                    |
| XP_009689625.1 | 0.0267942  | 0.57925    | 0.0462566    | 0.0220599   | 0.592321   | 0.0372432    | 0.04175   | uncharacterized protein                                 |
| XP_009689626.1 | 0.11879    | 0.867882   | 0.136874     | 0.103467    | 0.853379   | 0.121244     | 0.129059  | tRNA-2'-O-ribose methyltransferase                      |
| XP_009689627.1 | 0.0278544  | 0.541963   | 0.0513954    | 0.0233269   | 0.557708   | 0.0418264    | 0.046611  | uncharacterized protein                                 |
| XP_009689628.1 | 0.0180417  | 0.227979   | 0.0791377    | NA          | NA         | NA           | NA        | conserved hypothetical protein                          |
| XP_009689629.1 | 0.0412068  | 0.625819   | 0.0658445    | 0.0389955   | 0.728598   | 0.0535213    | 0.059683  | uncharacterized protein                                 |
| XP_009689630.1 | 0.0389007  | 0.911856   | 0.042661     | 0.0325368   | 0.723857   | 0.0449492    | 0.043805  | uncharacterized protein                                 |
| XP_009689631.1 | 0.0665769  | 0.532335   | 0.125066     | 0.0581614   | 0.55665    | 0.104485     | 0.114776  | uncharacterized protein                                 |
| XP_009689632.1 | 0.0252736  | 0.52577    | 0.0480698    | 0.0278088   | 0.397497   | 0.0699597    | 0.059015  | conserved hypothetical protein                          |
| XP_009689633.1 | 0.0288055  | 0.396157   | 0.0727124    | 0.0286245   | 0.421067   | 0.067981     | 0.070347  | conserved hypothetical protein                          |
| XP_009689634.1 | 0.0253043  | 0.38854    | 0.0651267    | 0.0210396   | 0.298223   | 0.0705499    | 0.067838  | 5'-3' exoribonuclease 1                                 |
| XP_009689635.1 | 0.0743015  | 0.505629   | 0.146949     | 0.0552935   | 0.473055   | 0.116886     | 0.131917  | uncharacterized protein                                 |

| protein_id     | Chitose_ka  | Chitose_ks | Chitose_kaks | Buffeli_ka  | Buffeli_ks | Buffeli_kaks | mean_kaks  | function                                                      |
|----------------|-------------|------------|--------------|-------------|------------|--------------|------------|---------------------------------------------------------------|
| XP_009689636.1 | 0.00996776  | 0.572477   | 0.0174116    | 0.00208994  | 0.711939   | 0.00293557   | 0.010174   | 26S proteasome subunit 4                                      |
| XP_009689637.1 | 0.0189199   | 0.494591   | 0.0382537    | 0.00489424  | 0.256295   | 0.0190961    | 0.028675   | uncharacterized protein                                       |
| XP_009689638.1 | 0.10167     | 0.698435   | 0.145568     | 0.0772742   | 0.562459   | 0.137386     | 0.141477   | conserved hypothetical protein                                |
| XP_009689639.1 | 0.0929974   | 0.378449   | 0.245733     | 0.0454162   | 0.213569   | 0.212653     | 0.229193   | conserved hypothetical protein                                |
| XP_009689640.1 | 0.0469825   | 0.637592   | 0.0736874    | 0.0316611   | 0.592998   | 0.0533915    | 0.063539   | uncharacterized protein                                       |
| XP_009689641.1 | 0.0409013   | 0.395644   | 0.103379     | 0.0544567   | 0.342474   | 0.15901      | 0.131194   | DNA repair protein                                            |
| XP_009689642.1 | 0.0190302   | 0.592537   | 0.0321165    | 0.0151854   | 0.56066    | 0.0270848    | 0.029601   | uncharacterized protein                                       |
| XP_009689643.1 | 0.004228    | 0.469985   | 0.00899602   | 0.00650586  | 0.315904   | 0.0205944    | 0.014795   | signal recognition particle protein 2                         |
| XP_009689644.1 | 0.01043     | 0.30845    | 0.0338143    | 0.0118885   | 0.240141   | 0.0495063    | 0.04166    | eukaryotic translation initiation factor 2 subunit alpha      |
| XP_009689645.1 | 0.0441674   | 0.376787   | 0.117221     | 0.00936729  | 0.362054   | 0.0258726    | 0.071547   | uncharacterized protein                                       |
| XP_009689646.1 | 0.104136    | 0.604799   | 0.172182     | 0.0763381   | 0.698378   | 0.109308     | 0.140745   | conserved hypothetical protein                                |
| XP_009689647.1 | 0.0738527   | 0.284701   | 0.259405     | 0.0591391   | 0.33787    | 0.175035     | 0.21722    | uncharacterized protein                                       |
| XP_009689648.1 | 0.0317582   | 0.303461   | 0.104653     | 0.0353742   | 0.320739   | 0.11029      | 0.107471   | uncharacterized protein                                       |
| XP_009689649.1 | 0.0304049   | 0.471054   | 0.0645466    | 0.0647489   | 0.264533   | 0.244739     | 0.154643   | hypothetical protein                                          |
| XP_009689650.1 | 0.0495962   | 0.358925   | 0.13818      | 0.0380156   | 0.445533   | 0.085326     | 0.111753   | uncharacterized protein                                       |
| XP_009689651.1 | 0.0152827   | 0.187299   | 0.0815953    |             |            |              | 0.0815953  | predicted protein                                             |
| XP_009689652.1 | 0.00474841  | 0.390641   | 0.0121554    | 0.00904404  | 0.394371   | 0.0229328    | 0.017544   | ubiquinol-cytochrome C reductase complex subunit-like protein |
| XP_009689653.1 | 0.0477448   | 0.600883   | 0.0794578    | 0.0590583   | 0.568526   | 0.10388      | 0.091669   | uncharacterized protein                                       |
| XP_009689654.1 | 0.0205632   | 0.909296   | 0.0226145    | 0.0197957   | 1.08887    | 0.0181801    | 0.020397   | GMP synthase                                                  |
| XP_009689655.1 | 0.0682952   | 0.385048   | 0.177368     | 0.044746    | 0.492391   | 0.0908749    | 0.134121   | protein disulfide isomerase                                   |
| XP_009689656.1 | 0.0598284   | 0.582161   | 0.10277      | 0.0588452   | 0.626323   | 0.0939535    | 0.098362   | conserved hypothetical protein                                |
| XP_009689657.1 | 0.0232292   | 0.482878   | 0.0481056    | 0.0155199   | 0.494823   | 0.0313645    | 0.039735   | splicing factor                                               |
| XP_009689658.1 | 0.0255023   | 1.57739    | 0.0161674    | 0.0302692   | 1.94077    | 0.0155965    | 0.015882   | uncharacterized protein                                       |
| XP_009689659.1 | 0.069761    | 0.372273   | 0.187392     | 0.067573    | 0.354436   | 0.190649     | 0.189021   | conserved hypothetical protein                                |
| XP_009689660.1 | 0.188709    | 0.448696   | 0.420571     | 0.152393    | 0.220343   | 0.691616     | 0.556094   | conserved hypothetical protein                                |
| XP_009689661.1 | 0.0185427   | 0.379332   | 0.0488826    |             |            |              | 0.0488826  | conserved hypothetical protein                                |
| XP_009689662.1 | 0.0544275   | 0.329991   | 0.164936     | 0.0425604   | 0.259475   | 0.164025     | 0.164481   | DNA repair protein                                            |
| XP_009689663.1 | 0.0511091   | 0.757767   | 0.067447     | 0.0465531   | 0.736038   | 0.0632482    | 0.065348   | uncharacterized protein                                       |
| XP_009689664.1 | 0.17074     | 0.327733   | 0.520974     |             |            |              | 0.520974   | conserved hypothetical protein                                |
| XP_009689665.1 | 0.051884    | 0.0316184  | 1.64094      |             |            |              | 1.64094    | hypothetical protein                                          |
| XP_009689666.1 | 0.0912484   | 0.307023   | 0.297204     | 0.159326    | 0.350532   | 0.454526     | 0.375865   | hypothetical protein                                          |
| XP_009689667.1 | 0.03326     | 0.519892   | 0.0639749    | 0.0333686   | 0.483965   | 0.0689483    | 0.066462   | conserved hypothetical protein                                |
| XP_009689668.1 | 0.0214496   | 0.483963   | 0.0443207    | 0.0138614   | 0.449149   | 0.0308615    | 0.037591   | proteasome subunit beta type                                  |
| XP_009689669.1 | 0.0455094   | 0.297694   | 0.152873     | 0.0530409   | 0.380096   | 0.139546     | 0.146209   | conserved hypothetical protein                                |
| XP_009689670.1 | 0.0028429   | 0.293852   | 0.00967461   |             |            |              | 0.00967461 | Rab GTPase                                                    |
| XP_009689671.1 | 0.0627036   | 0.59249    | 0.105831     | 0.0727536   | 0.845069   | 0.086092     | 0.095962   | uncharacterized protein                                       |
| XP_009689672.1 | 0.0690147   | 0.580047   | 0.118981     | 0.0342349   | 0.405382   | 0.0844508    | 0.101716   | protein kinase                                                |
| XP_009689673.1 | 0.0202803   | 0.519341   | 0.03905      | 0.0102632   | 0.590513   | 0.0173801    | 0.028215   | casein kinase II subunit beta                                 |
| XP_009689674.1 | 0.0879047   | 0.346288   | 0.253849     | 0.0788972   | 0.239728   | 0.329111     | 0.29148    | conserved hypothetical protein                                |
| XP_009689675.1 | 0.0905041   | 0.437777   | 0.206735     | 0.0710991   | 0.455428   | 0.156115     | 0.181425   | conserved hypothetical protein                                |
| XP_009689676.1 | 0.0100438   | 0.203696   | 0.0493077    | 0.00602921  | 0.191547   | 0.0314764    | 0.040392   | eukaryotic translation initiation factor                      |
| XP_009689677.1 | 0.000390125 | 0.390125   | 0.001        | 0.000346425 | 0.346425   | 0.001        | 0.001      | Tim10                                                         |
| XP_009689678.1 | 0.0384628   | 0.52007    | 0.073957     | 0.0361028   | 0.437343   | 0.0825501    | 0.078254   | cytochrome C1 heme lyase                                      |
| XP_009689679.1 | 0.0335806   | 0.328388   | 0.102259     | 0.0127408   | 0.411687   | 0.0309478    | 0.066603   | Pre-rRNA-processing protein PNO1                              |
| XP_009689680.1 | 0.0779266   | 0.335516   | 0.232259     | 0.0620194   | 0.422596   | 0.146758     | 0.189508   | Conserved hypothetical protein                                |
| XP_009689681.1 | 0.00522388  | 0.45032    | 0.0116004    | 0.000665772 | 0.665772   | 0.001        | 0.0063     | uncharacterized protein                                       |
| XP_009689682.1 | 0.099414    | 0.371186   | 0.267828     | 0.0632394   | 0.315188   | 0.20064      | 0.234234   | conserved hypothetical protein                                |
| XP_009689683.1 | 0.0407448   | 0.36742    | 0.110894     | 0.0432215   | 0.41926    | 0.10309      | 0.106992   | uncharacterized protein                                       |
| XP_009689685.1 | 0.0224796   | 0.593734   | 0.0378614    | 0.0175404   | 0.549594   | 0.0319153    | 0.034888   | conserved hypothetical protein                                |
| XP_009689686.1 | 0.0265826   | 0.28982    | 0.0917212    | 0.0273396   | 0.293908   | 0.0930207    | 0.092371   | conserved hypothetical protein                                |
| XP_009689687.1 | 0.0470621   | 0.247355   | 0.190261     |             |            |              | 0.190261   | conserved hypothetical protein                                |
| XP_009689689.1 | 0.0876427   | 0.581934   | 0.150606     | 0.092857    | 0.75672    | 0.12271      | 0.136658   | conserved hypothetical protein                                |
| XP_009689690.1 | 0.100102    | 0.603736   | 0.165803     | 0.0603591   | 0.492502   | 0.122556     | 0.14418    | exosome ribonuclease PH                                       |

| protein_id     | Chitose_ka  | Chitose_ks | Chitose_kaks | Buffeli_ka | Buffeli_ks | Buffeli_kaks | mean_kaks | function                                                      |
|----------------|-------------|------------|--------------|------------|------------|--------------|-----------|---------------------------------------------------------------|
| XP_009689691.1 | 0.0229765   | 0.576952   | 0.0398239    | 0.0206963  | 0.467561   | 0.0442643    | 0.042044  | DNA polymerase delta catalytic subunit                        |
| XP_009689692.1 | 0.0716989   | 0.843034   | 0.0850487    | 0.0544716  | 0.985975   | 0.0552464    | 0.070148  | uncharacterized protein                                       |
| XP_009689693.1 | 0.0550783   | 0.52723    | 0.104467     | 0.0437836  | 0.475582   | 0.0920631    | 0.098265  | uncharacterized protein                                       |
| XP_009689694.1 | 0.0780807   | 0.522478   | 0.149443     | 0.0688537  | 0.566217   | 0.121603     | 0.135523  | conserved hypothetical protein                                |
| XP_009689695.1 | 2.29097E-05 | 0.0229097  | 0.001        |            |            |              | 0.001     | conserved hypothetical protein                                |
| XP_009689696.1 | 0.0744462   | 0.574327   | 0.129623     | 0.0936577  | 0.641139   | 0.14608      | 0.137851  | uncharacterized protein                                       |
| XP_009689697.1 | 0.0606694   | 0.544708   | 0.11138      | 0.061821   | 0.509663   | 0.121298     | 0.116339  | uncharacterized protein                                       |
| XP_009689698.1 | 0.0559507   | 0.746166   | 0.0749842    | 0.0379403  | 0.599439   | 0.063293     | 0.069139  | exosome complex exonuclease                                   |
| XP_009689699.1 | 0.0213276   | 0.356269   | 0.0598639    | 0.0119257  | 0.348204   | 0.0342491    | 0.047057  | proteasome subunit beta type                                  |
| XP_009689700.1 | 0.0255308   | 0.151375   | 0.16866      | 0.0396229  | 0.200099   | 0.198017     | 0.183339  | uncharacterized protein                                       |
| XP_009689701.1 | 0.0930816   | 0.641698   | 0.145055     | 0.0743044  | 0.664582   | 0.111806     | 0.128431  | conserved hypothetical protein                                |
| XP_009689702.1 | 0.0531075   | 0.401605   | 0.132238     | 0.0396757  | 0.4038     | 0.0982559    | 0.115247  | conserved hypothetical protein                                |
| XP_009689703.1 | 0.0502893   | 0.500005   | 0.100578     | 0.0555359  | 0.587285   | 0.0945637    | 0.097571  | conserved hypothetical protein                                |
| XP_009689704.1 | 0.0672611   | 0.35225    | 0.190947     | 0.0670996  | 0.364723   | 0.183974     | 0.187461  | conserved hypothetical protein                                |
| XP_009689705.1 | 0.0995769   | 0.539174   | 0.184684     | 0.0446743  | 0.482571   | 0.0925756    | 0.13863   | conserved hypothetical protein                                |
| XP_009689706.1 | 0.070681    | 0.281418   | 0.25116      | 0.0595987  | 0.354116   | 0.168303     | 0.209732  | conserved hypothetical protein                                |
| XP_009689707.1 | 0.056442    | 0.446234   | 0.126485     | 0.0534881  | 0.333678   | 0.160299     | 0.143392  | uncharacterized protein                                       |
| XP_009689708.1 | 0.123819    | 0.560998   | 0.220713     |            |            |              | 0.220713  | conserved hypothetical protein                                |
| XP_009689709.1 | 0.0546794   | 0.854718   | 0.0639736    | 0.0583938  | 0.778571   | 0.0750012    | 0.069487  | uncharacterized protein                                       |
| XP_009689710.1 | 0.0727685   | 0.464311   | 0.156723     | 0.072818   | 0.481242   | 0.151313     | 0.154018  | uncharacterized protein                                       |
| XP_009689711.1 | 0.0454925   | 0.514517   | 0.0884179    | 0.0423548  | 0.376858   | 0.112389     | 0.100403  | P-type ATPase                                                 |
| XP_009689712.1 | 0.0724157   | 0.450484   | 0.160751     | 0.0686489  | 0.324829   | 0.211339     | 0.186045  | DEAD-box family RNA helicase                                  |
| XP_009689713.1 | 0.0633775   | 0.0599466  | 1.05723      | 0.043378   | 0.125758   | 0.344933     | 0.701081  | DEAD-box family RNA helicase                                  |
| XP_009689714.1 | 0.00495796  | 0.703661   | 0.00704596   | 0.00319184 | 1.22002    | 0.00261622   | 0.004831  | 60S ribosomal protein L31                                     |
| XP_009689715.1 | 0.0306488   | 0.561954   | 0.0545398    | 0.0178433  | 0.617671   | 0.028888     | 0.041714  | uncharacterized protein                                       |
| XP_009689716.1 | 0.0523091   | 0.758564   | 0.0689581    | 0.0342524  | 0.604209   | 0.0566896    | 0.062824  | actin depolymerizing factor                                   |
| XP_009689718.1 | 0.0821012   | 0.00164202 | 50           |            |            |              | 50        | hypothetical protein                                          |
| XP_009689719.1 | 0.0273414   | 0.239318   | 0.114247     | 0.0143993  | 0.0924665  | 0.155724     | 0.134986  | prefoldin subunit 3                                           |
| XP_009689720.1 | 0.045848    | 0.454331   | 0.100913     |            |            |              | 0.100913  | vesicular cargo protein                                       |
| XP_009689721.1 | 0.0445708   | 0.673451   | 0.0661827    | 0.0295627  | 0.632117   | 0.0467677    | 0.056475  | ATP synthase subunit delta                                    |
| XP_009689722.1 | 0.132961    | 0.587458   | 0.226333     | 0.124271   | 0.25486    | 0.487605     | 0.356969  | metastasis-associated protein MTA2                            |
| XP_009689723.1 | 0.0883938   | 0.59622    | 0.148257     | 0.0734579  | 0.611451   | 0.120137     | 0.134197  | conserved hypothetical protein                                |
| XP_009689724.1 | 0.0899924   | 0.701803   | 0.12823      | 0.0854032  | 0.667859   | 0.127876     | 0.128053  | conserved hypothetical protein                                |
| XP_009689726.1 | 0.0290109   | 1.19438    | 0.0242896    | 0.0298326  | 1.36703    | 0.0218229    | 0.023056  | molecular chaperone protein                                   |
| XP_009689727.1 | 0.0923062   | 0.414288   | 0.222807     | 0.0600481  | 0.315407   | 0.190383     | 0.206595  | uncharacterized protein                                       |
| XP_009689728.1 | 0.0532989   | 0.350526   | 0.152054     | 0.112463   | 0.32752    | 0.343378     | 0.247716  | conserved hypothetical protein                                |
| XP_009689729.1 | 0.018762    | 0.850149   | 0.0220691    | 0.0207359  | 0.71915    | 0.0288339    | 0.025452  | SWI/SNF family transcriptional activator protein              |
| XP_009689730.1 | 0.152116    | 0.73434    | 0.207147     | 0.0962534  | 0.684555   | 0.140607     | 0.173877  | conserved hypothetical protein                                |
| XP_009689731.1 | 0.00565917  | 0.79437    | 0.00712411   | 0.00579199 | 0.647398   | 0.00894657   | 0.008035  | transitional endoplasmic reticulum ATPase                     |
| XP_009689732.1 | 0.0343242   | 0.697253   | 0.0492278    | 0.0333794  | 0.556444   | 0.059987     | 0.054607  | uncharacterized protein                                       |
| XP_009689733.1 | 0.0953606   | 0.518412   | 0.183948     | 0.0698248  | 0.291299   | 0.239702     | 0.211825  | conserved hypothetical protein                                |
| XP_009689734.1 | 0.011845    | 0.392696   | 0.0301632    | 0.0172504  | 0.370441   | 0.0465674    | 0.038365  | uncharacterized protein                                       |
| XP_009689735.1 | 0.129601    | 0.404436   | 0.320448     | 0.0895953  | 0.37214    | 0.240757     | 0.280602  | conserved hypothetical protein                                |
| XP_009689736.1 | 0.0533246   | 0.631865   | 0.0843923    | 0.0373474  | 0.510183   | 0.0732039    | 0.078798  | choline/ethanolamine kinase                                   |
| XP_009689737.1 |             |            |              | 0.0158726  | 0.16735    | 0.0948467    | 0.0948467 | protein kinase                                                |
| XP_009689738.1 | 0.106594    | 0.517227   | 0.206088     |            |            |              | 0.206088  | conserved hypothetical protein                                |
| XP_009689739.1 | 0.0162363   | 0.959235   | 0.0169263    | 0.0136752  | 1.04128    | 0.0131331    | 0.01503   | polyadenylate-binding protein                                 |
| XP_009689740.1 | 0.0190823   | 0.44296    | 0.0430791    |            |            |              | 0.0430791 | ribosome biogenesis regulatory protein                        |
| XP_009689741.1 | 0.0442558   | 0.47832    | 0.0925233    | 0.0238775  | 0.486901   | 0.0490397    | 0.070781  | co-chaperone protein                                          |
| XP_009689742.1 | 0.0236948   | 0.3265     | 0.0725723    | 0.0279476  | 0.332292   | 0.0841057    | 0.078339  | conserved hypothetical protein                                |
| XP_009689743.1 | 0.015387    | 0.285363   | 0.0539209    | 0.00856884 | 0.232331   | 0.036882     | 0.045401  | small ribonucleoprotein D1                                    |
| XP_009689744.1 | 0.0279215   | 0.360629   | 0.0774243    | 0.0250161  | 0.257586   | 0.0971175    | 0.087271  | mitochondrial inner membrane subunit                          |
| XP_009689745.1 | 0.000358311 | 0.358311   | 0.001        | 0.00529045 | 0.32447    | 0.0163049    | 0.008652  | mitochondrial import inner membrane translocase Tim17 subunit |



| protein_id     | Chitose_ka  | Chitose_ks | Chitose_kaks | Buffeli_ka  | Buffeli_ks | Buffeli_kaks | mean_kaks | function                                           |
|----------------|-------------|------------|--------------|-------------|------------|--------------|-----------|----------------------------------------------------|
| XP_009689746.1 | 0.0874512   | 0.661835   | 0.132134     | 0.101312    | 0.979204   | 0.103463     | 0.117799  | conserved hypothetical protein                     |
| XP_009689747.1 | 0.0523637   | 0.464048   | 0.112841     | 0.0535287   | 0.56312    | 0.0950573    | 0.103949  | conserved hypothetical protein                     |
| XP_009689748.1 | 0.0707211   | 0.422514   | 0.167382     | 0.0469181   | 0.252539   | 0.185786     | 0.176584  | conserved hypothetical protein                     |
| XP_009689749.1 | 0.00921551  | 0.402131   | 0.0229167    | 0.0116855   | 0.456838   | 0.0255791    | 0.024248  | transketolase subunit                              |
| XP_009689750.1 | 0.0233024   | 0.607901   | 0.0383325    | 0.0187662   | 0.602751   | 0.0311343    | 0.034733  | threonyl-tRNA synthetase                           |
| XP_009689751.1 | 0.0438415   | 0.559968   | 0.0782928    | 0.0356998   | 0.527915   | 0.0676242    | 0.072958  | autophagy protein                                  |
| XP_009689752.1 | 0.119189    | 0.535115   | 0.222736     | 0.0955483   | 0.53107    | 0.179917     | 0.201326  | uncharacterized protein                            |
| XP_009689753.1 | 0.0487558   | 0.236942   | 0.205771     | 0.0858935   | 0.35717    | 0.240484     | 0.223128  | uncharacterized protein                            |
| XP_009689754.1 | 0.052016    | 0.496913   | 0.104678     | 0.0330411   | 0.476762   | 0.0693031    | 0.086991  | uncharacterized protein                            |
| XP_009689755.1 | 0.0589922   | 0.408789   | 0.14431      | 0.0587498   | 0.471278   | 0.124661     | 0.134485  | uncharacterized protein                            |
| XP_009689756.1 | 0.0479067   | 0.319407   | 0.149987     | 0.0504794   | 0.381759   | 0.132228     | 0.141107  | uncharacterized protein                            |
| XP_009689757.1 | 0.0134337   | 0.509369   | 0.0263732    | 0.0188204   | 0.385318   | 0.0488437    | 0.037608  | conserved hypothetical protein                     |
| XP_009689758.1 | 0.0170417   | 0.409999   | 0.0415653    | 0.00317447  | 0.334569   | 0.00948824   | 0.025527  | uncharacterized protein                            |
| XP_009689759.1 | 0.00176868  | 1.76868    | 0.001        | 0.0003411   | 0.3411     | 0.001        | 0.001     | 60S ribosomal protein L35                          |
| XP_009689760.1 | 0.0437653   | 0.917142   | 0.0477192    | 0.0404871   | 0.987501   | 0.0409995    | 0.044359  | phosphoglycerate kinase                            |
| XP_009689761.1 | 0.208632    | 0.159149   | 1.31092      | 0.183337    | 0.133738   | 1.37087      | 1.340895  | conserved hypothetical protein                     |
| XP_009689762.1 | 0.0642367   | 0.919163   | 0.069886     | 0.0845441   | 1.00506    | 0.0841185    | 0.077002  | conserved hypothetical protein                     |
| XP_009689763.1 | 0.161269    | 0.0283883  | 5.68083      | 0.178701    | 0.0750278  | 2.3818       | 4.031315  | hypothetical protein                               |
| XP_009689765.1 | 0.0236066   | 0.524517   | 0.0450063    | 0.035825    | 0.518993   | 0.069028     | 0.057017  | 7%2C8 dihydro-8-oxoguanine DNA glycosylase         |
| XP_009689766.1 | 0.0201106   | 0.440408   | 0.0456635    | 0.0201038   | 0.578897   | 0.0347278    | 0.040196  | conserved hypothetical protein                     |
| XP_009689767.1 | 0.0319715   | 0.524186   | 0.0609927    | 0.0353443   | 0.373251   | 0.0946931    | 0.077843  | uncharacterized protein                            |
| XP_009689768.1 | 0.0243646   | 0.277784   | 0.0877104    | 0.0219854   | 0.414251   | 0.0530726    | 0.070391  | mitochondrial membrane protease%2C subunit 2       |
| XP_009689769.1 | 0.0750876   | 0.521216   | 0.144062     | 0.0736498   | 0.437444   | 0.168364     | 0.156213  | conserved hypothetical protein                     |
| XP_009689770.1 | 0.075686    | 0.662734   | 0.114203     | 0.0559137   | 0.65397    | 0.0854989    | 0.099851  | uncharacterized protein                            |
| XP_009689771.1 | 0.124141    | 0.589871   | 0.210454     | 0.148051    | 0.610232   | 0.242615     | 0.226534  | conserved hypothetical protein                     |
| XP_009689772.1 | 1.38327E-05 | 0.0138327  | 0.001        | 0.00039469  | 0.39469    | 0.001        | 0.001     | conserved hypothetical protein                     |
| XP_009689773.1 | 0.109668    | 0.457804   | 0.239551     | 0.0681498   | 0.49011    | 0.13905      | 0.1893    | conserved hypothetical protein                     |
| XP_009689774.1 | 0.0551549   | 0.765157   | 0.072083     | 0.0517968   | 0.780075   | 0.0663998    | 0.069241  | DNA-directed RNA polymerase precursor              |
| XP_009689775.1 | 0.0283738   | 0.487406   | 0.0582138    | 0.0238518   | 0.398816   | 0.0598065    | 0.05901   | conserved hypothetical protein                     |
| XP_009689776.1 | 0.0234337   | 0.277631   | 0.0844057    | 0.00523894  | 0.263092   | 0.0199129    | 0.052159  | uncharacterized protein                            |
| XP_009689777.1 | 0.0197257   | 0.224653   | 0.0878053    | 0.00957486  | 0.369915   | 0.0258839    | 0.056845  | replication factor C subunit                       |
| XP_009689778.1 | 0.0208795   | 0.548076   | 0.038096     | 0.0355499   | 0.328219   | 0.108312     | 0.073204  | conserved hypothetical protein                     |
| XP_009689779.1 | 0.000377484 | 0.377484   | 0.001        | 0.000273524 | 0.273524   | 0.001        | 0.001     | ribosomal protein S26e                             |
| XP_009689780.1 | 0.0639323   | 0.598875   | 0.106754     | 0.0768603   | 0.128306   | 0.599038     | 0.352896  | conserved hypothetical protein                     |
| XP_009689781.1 | 0.0829486   | 0.701841   | 0.118187     | 0.0732814   | 0.732515   | 0.100041     | 0.109114  | conserved hypothetical protein                     |
| XP_009689782.1 | 0.0367674   | 0.594349   | 0.0618617    | 0.0445791   | 0.702369   | 0.0634697    | 0.062666  | calmodulin-domain protein kinase                   |
| XP_009689783.1 | 0.0656235   | 0.409005   | 0.160447     | 0.0520769   | 0.251937   | 0.206706     | 0.183577  | thrombospondin%2C type I repeat containing protein |
| XP_009689784.1 | 0.0353695   | 0.43017    | 0.082222     | 0.0140004   | 0.410281   | 0.034124     | 0.058173  | uncharacterized protein                            |
| XP_009689785.1 | 0.158625    | 0.367401   | 0.431748     | 0.14784     | 0.338688   | 0.436508     | 0.434128  | uncharacterized protein                            |
| XP_009689786.1 | 0.0215182   | 0.626242   | 0.0343608    | 0.0218968   | 0.577924   | 0.0378888    | 0.036125  | transcription factor IIH subunit                   |
| XP_009689787.1 | 0.0185347   | 0.491582   | 0.0377041    | 0.0128576   | 0.63666    | 0.0201954    | 0.02895   | conserved hypothetical protein                     |
| XP_009689788.1 | 0.00822768  | 0.234431   | 0.0350964    | 0.0188616   | 0.250477   | 0.0753027    | 0.0552    | uncharacterized protein                            |
| XP_009689789.1 | 0.025925    | 0.238805   | 0.108561     |             |            |              | 0.108561  | uncharacterized protein                            |
| XP_009689790.1 | 0.0279306   | 0.525813   | 0.0531189    | 0.0359754   | 0.512965   | 0.0701323    | 0.061626  | phosphoribosyl pyrophosphate synthetase            |
| XP_009689791.1 | 0.0829467   | 0.562094   | 0.147567     | 0.0769272   | 0.51987    | 0.147974     | 0.14777   | conserved hypothetical protein                     |
| XP_009689793.1 | 0.0212788   | 0.52217    | 0.0407507    |             |            |              | 0.0407507 | DNA repair protein                                 |
| XP_009689794.1 | 0.0526903   | 0.189995   | 0.277324     | 0.0325337   | 0.0941277  | 0.345634     | 0.311479  | conserved hypothetical protein                     |
| XP_009689795.1 | 0.0583529   | 0.565175   | 0.103248     | 0.062369    | 0.563992   | 0.110585     | 0.106916  | conserved hypothetical protein                     |
| XP_009689796.1 | 0.0933955   | 0.405515   | 0.230313     | 0.0728389   | 0.495793   | 0.146914     | 0.188613  | conserved hypothetical protein                     |
| XP_009689797.1 | 0.0840228   | 0.619283   | 0.135678     | 0.0683364   | 0.647577   | 0.105526     | 0.120602  | uncharacterized protein                            |
| XP_009689798.1 | 0.0395383   | 0.331998   | 0.119092     | 0.0205228   | 0.241006   | 0.0851548    | 0.102123  | uncharacterized protein                            |
| XP_009689799.1 | 0.027676    | 0.761239   | 0.0363565    | 0.0215899   | 0.572337   | 0.0377224    | 0.037039  | alanyl-tRNA synthetase                             |
| XP_009689800.1 | 0.0268059   | 0.578885   | 0.0463061    | 0.0213127   | 0.42181    | 0.0505268    | 0.048416  | uncharacterized protein                            |

| protein_id     | Chitose_ka | Chitose_ks | Chitose_kaks | Buffeli_ka | Buffeli_ks | Buffeli_kaks | mean_kaks | function                                         |
|----------------|------------|------------|--------------|------------|------------|--------------|-----------|--------------------------------------------------|
| XP_009689801.1 | 0.0818251  | 0.629729   | 0.129937     | 0.0542809  | 0.68447    | 0.0793036    | 0.10462   | uncharacterized protein                          |
| XP_009689802.1 | 0.0233074  | 1.03553    | 0.0225076    | 0.0299165  | 0.601361   | 0.049748     | 0.036128  | conserved hypothetical protein                   |
| XP_009689803.1 | 0.0336109  | 0.415003   | 0.0809894    | 0.0256085  | 0.378046   | 0.0677392    | 0.074364  | RNA pseudouridylylase synthase                   |
| XP_009689804.1 | 0.0609743  | 0.704184   | 0.0865886    | 0.0505413  | 0.526922   | 0.095918     | 0.091253  | uncharacterized protein                          |
| XP_009689805.1 | 0.0267506  | 0.623294   | 0.042918     | 0.0252537  | 0.613415   | 0.0411691    | 0.042044  | actin                                            |
| XP_009689806.1 | 0.0292747  | 0.493571   | 0.0593121    | 0.0348164  | 0.419326   | 0.0830295    | 0.071171  | uncharacterized protein                          |
| XP_009689807.1 | 0.0390083  | 0.447873   | 0.0870968    |            |            |              | 0.0870968 | conserved hypothetical protein                   |
| XP_009689808.1 | 0.0216412  | 0.446487   | 0.0484699    | 0.0174686  | 0.425395   | 0.0410644    | 0.044767  | uncharacterized protein                          |
| XP_009689809.1 | 0.0485675  | 0.34444    | 0.141004     | 0.03036    | 0.255394   | 0.118875     | 0.129939  | conserved hypothetical protein                   |
| XP_009689810.1 | 0.0358032  | 0.528212   | 0.0677819    | 0.0356973  | 0.462328   | 0.0772122    | 0.072497  | uncharacterized protein                          |
| XP_009689811.1 | 0.0580844  | 0.798832   | 0.0727116    | 0.0517722  | 0.569371   | 0.0909286    | 0.08182   | uncharacterized protein                          |
| XP_009689812.1 | 0.0406107  | 0.788338   | 0.0515143    | 0.0266903  | 0.909572   | 0.0293438    | 0.040429  | DEAD-box family helicase                         |
| XP_009689813.1 | 0.0182944  | 0.702672   | 0.0260354    | 0.0206445  | 0.445223   | 0.0463689    | 0.036202  | conserved hypothetical protein                   |
| XP_009689814.1 | 0.121735   | 0.645432   | 0.18861      | 0.113591   | 0.730071   | 0.155589     | 0.1721    | conserved hypothetical protein                   |
| XP_009689815.1 | 0.0397428  | 0.723938   | 0.0548981    | 0.0453564  | 0.522832   | 0.0867513    | 0.070825  | binding protein                                  |
| XP_009689817.1 | 0.0781862  | 0.538392   | 0.145222     | 0.0758763  | 0.523874   | 0.144837     | 0.145029  | arginyl-tRNA synthetase                          |
| XP_009689818.1 | 0.0543824  | 0.727868   | 0.0747146    | 0.0352983  | 0.646732   | 0.0545794    | 0.064647  | conserved hypothetical protein                   |
| XP_009689819.1 | 0.0422782  | 0.413411   | 0.102267     | 0.0304245  | 0.435603   | 0.0698446    | 0.086056  | uncharacterized protein                          |
| XP_009689820.1 | 0.00653175 | 0.323823   | 0.0201707    | 0.0250294  | 0.447388   | 0.0559457    | 0.038058  | protein kinase                                   |
| XP_009689821.1 | 0.0630197  | 0.828875   | 0.0760303    | 0.0713361  | 0.6172     | 0.11558      | 0.095805  | uncharacterized protein                          |
| XP_009689822.1 | 0.0605735  | 0.569886   | 0.106291     | 0.0523134  | 0.608914   | 0.0859126    | 0.096102  | uncharacterized protein                          |
| XP_009689823.1 | 0.0425882  | 0.691049   | 0.0616283    |            |            |              | 0.0616283 | nucleolar phosphoprotein                         |
| XP_009689824.1 | 0.0959756  | 0.572416   | 0.167667     | 0.08424    | 0.467449   | 0.180212     | 0.17394   | uncharacterized protein                          |
| XP_009689825.1 | 0.0487288  | 1.02922    | 0.0473454    | 0.0392404  | 0.997875   | 0.039324     | 0.043335  | uncharacterized protein                          |
| XP_009689826.1 | 0.090029   | 0.332507   | 0.270758     | 0.0866201  | 0.412567   | 0.209954     | 0.240356  | uncharacterized protein                          |
| XP_009689827.1 | 0.0632305  | 0.695747   | 0.0908815    | 0.0584171  | 0.582579   | 0.100273     | 0.095577  | conserved hypothetical protein                   |
| XP_009689828.1 | 0.0509429  | 0.309456   | 0.164621     | 0.0573766  | 0.265566   | 0.216054     | 0.190337  | conserved hypothetical protein                   |
| XP_009689829.1 | 0.0991523  | 0.331664   | 0.298954     | 0.102799   | 0.300807   | 0.341744     | 0.320349  | conserved hypothetical protein                   |
| XP_009689830.1 | 0.0108313  | 0.298445   | 0.0362924    |            |            |              | 0.0362924 | ubiquitin-like protein                           |
| XP_009689831.1 | 0.00793191 | 0.421886   | 0.0188011    | 0.00455954 | 0.538098   | 0.00847343   | 0.013637  | ATP-dependent Clp protease proteolytic subunit   |
| XP_009689832.1 | 0.0744546  | 0.428749   | 0.173656     | 0.0641707  | 0.336748   | 0.19056      | 0.182108  | uncharacterized protein                          |
| XP_009689833.1 | 0.070152   | 0.422432   | 0.166067     | 0.0580796  | 0.382165   | 0.151975     | 0.159021  | uncharacterized protein                          |
| XP_009689834.1 | 0.0249187  | 0.476824   | 0.0522596    | 0.0217308  | 0.469915   | 0.0462441    | 0.049252  | uncharacterized protein                          |
| XP_009689835.1 | 0.0298138  | 0.514528   | 0.0579439    | 0.028914   | 0.483023   | 0.0598606    | 0.058902  | porin                                            |
| XP_009689836.1 | 0.0825149  | 0.728086   | 0.113331     | 0.0584938  | 0.611039   | 0.0957285    | 0.10453   | uncharacterized protein                          |
| XP_009689837.1 | 0.070317   | 0.828918   | 0.0848299    | 0.0757756  | 0.770554   | 0.0983392    | 0.091585  | patatin-family phospholipase                     |
| XP_009689838.1 | 0.0095577  | 0.555059   | 0.0172193    | 0.00952447 | 0.663682   | 0.0143509    | 0.015785  | aconitate hydratase 3%2C mitochondrial precursor |
| XP_009689839.1 | 0.00734668 | 0.543925   | 0.0135068    | 0.0145888  | 0.596388   | 0.0244619    | 0.018984  | 60S ribosomal protein L2/L8                      |
| XP_009689840.1 | 0.0400862  | 0.515575   | 0.0777504    | 0.0528706  | 0.3446     | 0.153426     | 0.115588  | 3' exonuclease%2C exosome component              |
| XP_009689841.1 | 0.0915211  | 0.494396   | 0.185117     | 0.0934743  | 0.454904   | 0.205481     | 0.195299  | hypothetical protein                             |
| XP_009689842.1 | 0.0294776  | 0.685987   | 0.0429711    | 0.0267603  | 0.512069   | 0.052259     | 0.047615  | glutamyl-tRNA synthetase                         |
| XP_009689843.1 | 0.103875   | 0.825772   | 0.125791     | 0.0833758  | 0.669044   | 0.124619     | 0.125205  | conserved hypothetical protein                   |
| XP_009689844.1 | 0.0750175  | 0.418392   | 0.1793       | 0.0825012  | 0.518684   | 0.159059     | 0.169179  | conserved hypothetical protein                   |
| XP_009689845.1 | 0.0703296  | 0.429366   | 0.163799     | 0.0796767  | 0.620865   | 0.128332     | 0.146066  | major piroplasm surface protein                  |
| XP_009689846.1 | 0.108592   | 0.719566   | 0.150914     | 0.158395   | 0.831783   | 0.190428     | 0.170671  | conserved hypothetical protein                   |
| XP_009689847.1 | 0.0561586  | 0.437905   | 0.128244     | 0.0504342  | 0.503089   | 0.100249     | 0.114247  | conserved hypothetical protein                   |
| XP_009689848.1 | 0.0251151  | 0.474227   | 0.05296      | 0.023682   | 0.537459   | 0.044063     | 0.048511  | CDC5-like                                        |
| XP_009689849.1 | 0.0415036  | 0.313584   | 0.132352     | 0.0352914  | 0.298925   | 0.118061     | 0.125206  | uncharacterized protein                          |
| XP_009689850.1 | 0.0405808  | 0.434439   | 0.0934098    | 0.0303518  | 0.402085   | 0.075486     | 0.084448  | conserved hypothetical protein                   |
| XP_009689851.1 | 0.0196409  | 0.504176   | 0.0389565    | 0.00548837 | 0.495913   | 0.0110672    | 0.025012  | replication factor C subunit                     |
| XP_009689852.1 | 0.0759309  | 0.48901    | 0.155275     | 0.0698355  | 0.541288   | 0.129017     | 0.142146  | uncharacterized protein                          |
| XP_009689853.1 | 0.0539904  | 0.968133   | 0.0557675    | 0.050306   | 0.890004   | 0.0565234    | 0.056145  | conserved hypothetical protein                   |
| XP_009689854.1 | 0.0335749  | 0.994823   | 0.0337496    | 0.0301612  | 1.00848    | 0.0299077    | 0.031829  | uncharacterized protein                          |

| protein_id     | Chitose_ka  | Chitose_ks | Chitose_kaks | Buffeli_ka | Buffeli_ks | Buffeli_kaks | mean_kaks | function                                                   |
|----------------|-------------|------------|--------------|------------|------------|--------------|-----------|------------------------------------------------------------|
| XP_009689855.1 | 0.0672259   | 0.334697   | 0.200856     | 0.0583203  | 0.314666   | 0.18534      | 0.193098  | predicted protein                                          |
| XP_009689856.1 | 0.0768384   | 0.629919   | 0.121981     | 0.0737342  | 0.793765   | 0.0928917    | 0.107436  | conserved hypothetical protein                             |
| XP_009689857.1 | 0.0684135   | 0.546134   | 0.125269     | 0.0688677  | 0.600337   | 0.114715     | 0.119992  | HR1 rho-binding repeat containing protein                  |
| XP_009689858.1 | 0.0653626   | 0.300008   | 0.217869     | 0.0430242  | 0.253425   | 0.169771     | 0.19382   | DnaJ-like molecular chaperone                              |
| XP_009689859.1 | 0.0590149   | 0.342208   | 0.172453     | 0.0425104  | 0.40007    | 0.106258     | 0.139355  | uncharacterized protein                                    |
| XP_009689860.1 | 0.023864    | 0.689301   | 0.0346206    | 0.0382123  | 0.752198   | 0.0508008    | 0.042711  | hexose transporter                                         |
| XP_009689861.1 | 0.250042    | 0.397828   | 0.628517     |            |            |              | 0.628517  | hypothetical protein                                       |
| XP_009689862.1 | 0.000265789 | 0.265789   | 0.001        | 0.00325701 | 0.306467   | 0.0106276    | 0.005814  | Ubc protein                                                |
| XP_009689863.1 | 0.0481674   | 0.526733   | 0.0914456    | 0.0330789  | 0.526042   | 0.0628827    | 0.077164  | transcription factor TFII E                                |
| XP_009689864.1 | 0.0423388   | 0.427686   | 0.0989948    | 0.0353536  | 0.404251   | 0.0874547    | 0.093225  | queuine tRNA-ribosyltransferase                            |
| XP_009689865.1 | 0.0146838   | 0.451968   | 0.0324884    | 0.016371   | 0.549876   | 0.0297721    | 0.03113   | calmodulin-like domain protein kinase                      |
| XP_009689866.1 | 0.153478    | 0.387817   | 0.39575      |            |            |              | 0.39575   | hydrolase                                                  |
| XP_009689867.1 | 0.0683283   | 0.513565   | 0.133047     | 0.0419772  | 0.29165    | 0.14393      | 0.138489  | conserved hypothetical protein                             |
| XP_009689868.1 | 0.068044    | 0.439883   | 0.154686     | 0.0634824  | 0.400744   | 0.158411     | 0.156548  | conserved hypothetical protein                             |
| XP_009689869.1 | 0.0408871   | 0.198796   | 0.205674     | 0.0495018  | 0.213171   | 0.232216     | 0.218945  | uncharacterized protein                                    |
| XP_009689870.1 | 0.0298404   | 0.217765   | 0.13703      | 0.134285   | 0.692137   | 0.194015     | 0.165523  | HAD-superfamily hydrolase%2C subfamily IIB protein         |
| XP_009689871.1 | 0.0567369   | 0.300144   | 0.189032     | 0.0413116  | 0.222216   | 0.185908     | 0.18747   | haloacid dehalogenase-like family hydrolase                |
| XP_009689872.1 | 0.0583455   | 0.473567   | 0.123204     | 0.0185245  | 0.241435   | 0.0767264    | 0.099965  | nucleosome assembly protein                                |
| XP_009689873.1 | 0.0297682   | 0.314565   | 0.094633     | 0.0182817  | 0.326713   | 0.0559564    | 0.075295  | conserved hypothetical protein                             |
| XP_009689874.1 | 0.0301672   | 0.539208   | 0.0559473    | 0.0248515  | 0.468776   | 0.0530136    | 0.05448   | elongation factor 2                                        |
| XP_009689875.1 | 0.0297353   | 0.624403   | 0.047622     | 0.0308725  | 0.849902   | 0.0363248    | 0.041973  | step II splicing factor                                    |
| XP_009689876.1 | 0.0442492   | 0.490116   | 0.0902833    | 0.0412231  | 0.384009   | 0.107349     | 0.098816  | apoptosis regulatory protein                               |
| XP_009689877.1 | 0.0807938   | 0.642653   | 0.125719     | 0.0652862  | 0.565001   | 0.115551     | 0.120635  | conserved hypothetical protein                             |
| XP_009689878.1 | 0.0144785   | 0.497265   | 0.0291162    | 0.0309025  | 0.644205   | 0.04797      | 0.038543  | eukaryotic translation initiation factor 3 subunit         |
| XP_009689879.1 | 0.102746    | 0.536616   | 0.191471     | 0.085095   | 0.584728   | 0.145529     | 0.1685    | conserved hypothetical protein                             |
| XP_009689880.1 | 0.0473047   | 0.516554   | 0.0915775    | 0.0405554  | 0.558114   | 0.0726651    | 0.082121  | cysteine desulfurase                                       |
| XP_009689881.1 | 0.0527646   | 0.528032   | 0.0999269    | 0.048691   | 0.462836   | 0.105201     | 0.102564  | uncharacterized protein                                    |
| XP_009689882.1 | 0.122178    | 0.123482   | 0.989437     | 0.0854302  | 0.0761983  | 1.12116      | 1.055298  | hypothetical protein                                       |
| XP_009689883.1 | 0.0287591   | 0.51415    | 0.0559353    | 0.0392747  | 0.519981   | 0.075531     | 0.065733  | translation elongation factor E1-F beta                    |
| XP_009689884.1 | 0.0643417   | 0.373038   | 0.17248      | 0.061465   | 0.373258   | 0.164672     | 0.168576  | kinesin                                                    |
| XP_009689886.1 | 0.0136364   | 0.385202   | 0.0354007    | 0.0178403  | 0.406933   | 0.043841     | 0.039621  | mitochondrial phosphate carrier protein                    |
| XP_009689887.1 | 0.008612    | 0.320394   | 0.0268794    | 0.0317567  | 0.559519   | 0.0567571    | 0.041818  | XPA binding protein 1                                      |
| XP_009689888.1 | 0.0929484   | 0.68634    | 0.135426     | 0.0663894  | 0.529788   | 0.125313     | 0.130369  | pseudouridylate synthase                                   |
| XP_009689889.1 | 0.0144518   | 0.604248   | 0.023917     | 0.0088038  | 0.574211   | 0.015332     | 0.019624  | peptidyl-prolyl cis-trans isomerase                        |
| XP_009689890.1 | 0.128536    | 0.645865   | 0.199014     | 0.13313    | 0.721867   | 0.184424     | 0.191719  | ADP-ribosylation factor GTPase activating protein          |
| XP_009689891.1 | 0.0576077   | 0.855731   | 0.0673199    | 0.0572167  | 1.07223    | 0.0533621    | 0.060341  | uncharacterized protein                                    |
| XP_009689892.1 | 0.116416    | 0.380661   | 0.305825     | 0.0672455  | 0.398211   | 0.168869     | 0.237347  | conserved hypothetical protein                             |
| XP_009689893.1 | 0.0413059   | 0.45247    | 0.0912898    | 0.030768   | 0.431067   | 0.0713764    | 0.081333  | myosin                                                     |
| XP_009689894.1 | 0.0462916   | 0.813753   | 0.0568865    | 0.0401131  | 0.710715   | 0.0564404    | 0.056663  | conserved hypothetical protein                             |
| XP_009689895.1 | 0.123961    | 0.499204   | 0.248317     | 0.121984   | 0.440165   | 0.277132     | 0.262725  | conserved hypothetical protein                             |
| XP_009689896.1 | 0.0590698   | 0.545698   | 0.108246     | 0.0596464  | 0.369838   | 0.161277     | 0.134762  | uncharacterized protein                                    |
| XP_009689897.1 | 0.0957519   | 0.620371   | 0.154346     | 0.0869534  | 0.58241    | 0.149299     | 0.151822  | conserved hypothetical protein                             |
| XP_009689898.1 | 0.110934    | 0.464101   | 0.23903      | 0.112523   | 0.458007   | 0.24568      | 0.242355  | conserved hypothetical protein                             |
| XP_009689899.1 | 0.135294    | 0.417577   | 0.323998     | 0.115622   | 0.343491   | 0.33661      | 0.330304  | hypothetical protein                                       |
| XP_009689900.1 | 0.0306192   | 0.581088   | 0.0526928    | 0.0192331  | 0.661102   | 0.0290925    | 0.040893  | chaperonin                                                 |
| XP_009689901.1 | 0.108947    | 0.404948   | 0.269039     | 0.105584   | 0.378487   | 0.278964     | 0.274002  | conserved hypothetical protein                             |
| XP_009689902.1 | 0.156468    | 0.412611   | 0.379215     | 0.107639   | 0.343514   | 0.313347     | 0.346281  | conserved hypothetical protein                             |
| XP_009689906.1 | 0.13624     | 0.488211   | 0.27906      | 0.0937758  | 0.414268   | 0.226365     | 0.252713  | conserved hypothetical protein                             |
| XP_009689907.1 | 0.0795119   | 0.427457   | 0.186011     | 0.060992   | 0.336531   | 0.181237     | 0.183624  | conserved hypothetical protein                             |
| XP_009689908.1 | 0.0468367   | 0.53599    | 0.0873835    | 0.0452551  | 0.516085   | 0.0876893    | 0.087536  | uncharacterized protein                                    |
| XP_009689909.1 | 0.0883812   | 0.368376   | 0.239921     | 0.064595   | 0.418585   | 0.154317     | 0.197119  | conserved hypothetical protein                             |
| XP_009689910.1 | 0.0199224   | 0.442936   | 0.0449782    | 0.00440596 | 0.391439   | 0.0112558    | 0.028117  | chloroplast ribosomal protein L1/50S ribosomal protein L10 |
| XP_009689911.1 | 0.0205683   | 0.545424   | 0.0377106    | 0.0233011  | 0.429201   | 0.0542895    | 0.046     | uncharacterized protein                                    |

| protein_id     | Chitose_ka  | Chitose_ks | Chitose_kaks | Buffeli_ka | Buffeli_ks | Buffeli_kaks | mean_kaks | function                                       |
|----------------|-------------|------------|--------------|------------|------------|--------------|-----------|------------------------------------------------|
| XP_009689912.1 | 0.0657503   | 0.809342   | 0.0812392    | 0.0558981  | 0.624464   | 0.0895137    | 0.085376  | vacuolar sorting protein                       |
| XP_009689913.1 | 0.0337591   | 0.44524    | 0.0758222    | 0.0215884  | 0.474298   | 0.0455165    | 0.060669  | metalloprotease/cell division cycle protein    |
| XP_009689914.1 | 0.0335981   | 0.531203   | 0.0632491    | 0.0273618  | 0.4994     | 0.0547893    | 0.059019  | conserved hypothetical protein                 |
| XP_009689915.1 | 0.0388905   | 0.577934   | 0.0672922    | 0.037163   | 0.516108   | 0.0720062    | 0.069649  | DNA topoisomerase 2                            |
| XP_009689916.1 | 0.0646107   | 0.309207   | 0.208956     | 0.0587272  | 0.284172   | 0.206661     | 0.027809  | hypothetical protein                           |
| XP_009689917.1 | 0.0935417   | 0.59853    | 0.156286     | 0.0713827  | 0.511045   | 0.13968      | 0.147983  | conserved hypothetical protein                 |
| XP_009689918.1 | 0.0207703   | 0.417477   | 0.0497521    | 0.0205066  | 0.548879   | 0.037361     | 0.043557  | putative ribosomal protein L23                 |
| XP_009689919.1 | 0.0821033   | 0.31961    | 0.256886     | 0.107947   | 0.424151   | 0.254501     | 0.255694  | conserved hypothetical protein                 |
| XP_009689920.1 | 0.0527669   | 0.61172    | 0.0862599    | 0.0566984  | 0.701258   | 0.0808525    | 0.083556  | phosphatidylglycerophosphate synthase          |
| XP_009689922.1 | 0.0263781   | 0.476817   | 0.0553213    | 0.0251768  | 0.50889    | 0.049474     | 0.052398  | DEAD-box family helicase                       |
| XP_009689923.1 | 0.0493244   | 0.602388   | 0.0818815    | 0.0657686  | 0.538511   | 0.12213      | 0.102006  | orotidine 5'-phosphate decarboxylase           |
| XP_009689924.1 | 0.0938891   | 0.446621   | 0.210221     | 0.0875127  | 0.387353   | 0.225925     | 0.218073  | conserved hypothetical protein                 |
| XP_009689925.1 | 0.124577    | 0.591037   | 0.210776     | 0.115322   | 0.633428   | 0.18206      | 0.196418  | conserved hypothetical protein                 |
| XP_009689926.1 | 0.0303138   | 0.452954   | 0.0669247    | 0.0341662  | 0.385725   | 0.0885766    | 0.077751  | ubiquitin-fusion degradation pathway component |
| XP_009689927.1 | 0.0598841   | 0.700596   | 0.0854759    | 0.0476559  | 0.555398   | 0.0858049    | 0.08564   | uncharacterized protein                        |
| XP_009689928.1 | 0.0626737   | 0.435102   | 0.144044     | 0.0836288  | 0.388997   | 0.214985     | 0.179515  | ubiquitin-related chaperonin                   |
| XP_009689929.1 | 0.0265997   | 0.282255   | 0.09424      | 0.040462   | 0.195697   | 0.206759     | 0.1505    | uncharacterized protein                        |
| XP_009689930.1 | 0.0953613   | 0.391689   | 0.243462     | 0.0863447  | 0.342845   | 0.251848     | 0.247655  | conserved hypothetical protein                 |
| XP_009689931.1 | 0.00271125  | 0.605856   | 0.00447507   | 0.00551769 | 0.482098   | 0.0114452    | 0.00796   | protein tyrosine phosphatase                   |
| XP_009689932.1 | 0.0568635   | 0.536988   | 0.105893     | 0.0508692  | 0.455177   | 0.111757     | 0.108825  | acylphosphatase                                |
| XP_009689933.1 | 0.0583179   | 0.463596   | 0.125794     | 0.0508725  | 0.534408   | 0.0951942    | 0.110494  | conserved hypothetical protein                 |
| XP_009689935.1 | 0.0840448   | 0.601404   | 0.139748     | 0.084497   | 0.553172   | 0.15275      | 0.146249  | inositol phosphatase                           |
| XP_009689936.1 | 0.0582102   | 0.536667   | 0.108466     | 0.0842068  | 0.502902   | 0.167442     | 0.137954  | conserved hypothetical protein                 |
| XP_009689937.1 | 0.0552393   | 0.349952   | 0.157848     | 0.0659394  | 0.280289   | 0.235255     | 0.196551  | conserved hypothetical protein                 |
| XP_009689938.1 | 0.034182    | 0.196106   | 0.174304     |            |            |              | 0.174304  | conserved hypothetical protein                 |
| XP_009689939.1 | 0.0458402   | 0.446539   | 0.102657     | 0.0522837  | 0.351417   | 0.14878      | 0.125719  | uncharacterized protein                        |
| XP_009689940.1 | 0.0547669   | 0.724553   | 0.0755872    | 0.057212   | 0.693946   | 0.0824445    | 0.079016  | uncharacterized protein                        |
| XP_009689941.1 | 0.0355076   | 0.540606   | 0.0656811    | 0.0189734  | 0.465314   | 0.0407755    | 0.053228  | aspartyl aminopeptidase                        |
| XP_009689942.1 | 0.0825363   | 0.436275   | 0.189184     | 0.0986897  | 0.47298    | 0.208655     | 0.198919  | uncharacterized protein                        |
| XP_009689943.1 | 0.0375535   | 0.384063   | 0.0977795    | 0.0373271  | 0.4526     | 0.0824725    | 0.090126  | predicted protein                              |
| XP_009689944.1 | 0.0681135   | 0.442916   | 0.153784     | 0.00854416 | 0.383381   | 0.0222864    | 0.088035  | conserved hypothetical protein                 |
| XP_009689945.1 | 0.0347237   | 0.330107   | 0.105189     | 0.0233238  | 0.238561   | 0.0977687    | 0.101479  | uncharacterized protein                        |
| XP_009689946.1 | 0.00910119  | 0.176053   | 0.0516957    |            |            |              | 0.0516957 | Fe/Mn superoxide dismutase                     |
| XP_009689947.1 | 0.0160909   | 0.612953   | 0.0262514    | 0.0257216  | 0.475977   | 0.0540396    | 0.040146  | uncharacterized protein                        |
| XP_009689948.1 | 0.030258    | 0.644788   | 0.0469271    | 0.0145306  | 0.509784   | 0.0285034    | 0.037715  | ATPase                                         |
| XP_009689949.1 | 0.124101    | 0.429705   | 0.288804     | 0.0924641  | 0.406847   | 0.22727      | 0.258037  | conserved hypothetical protein                 |
| XP_009689950.1 | 0.0702105   | 0.458343   | 0.153183     | 0.0555083  | 0.486976   | 0.113986     | 0.133584  | uncharacterized protein                        |
| XP_009689951.1 | 0.0645662   | 0.407716   | 0.158361     | 0.0483955  | 0.427391   | 0.113235     | 0.135798  | conserved hypothetical protein                 |
| XP_009689952.1 | 0.0879849   | 0.434989   | 0.202269     | 0.0869284  | 0.381091   | 0.228104     | 0.215187  | uncharacterized protein                        |
| XP_009689953.1 | 0.0362256   | 0.677504   | 0.0534692    | 0.0373166  | 0.800744   | 0.0466024    | 0.050036  | major facilitator superfamily MFS-1 protein    |
| XP_009689954.1 | 0.1312      | 0.567666   | 0.231121     | 0.0736319  | 0.639725   | 0.115099     | 0.17311   | major facilitator superfamily MFS-1 protein    |
| XP_009689955.1 | 0.059042    | 0.40413    | 0.146097     | 0.0475731  | 0.323397   | 0.147104     | 0.146601  | conserved hypothetical protein                 |
| XP_009689956.1 | 0.0566005   | 0.466228   | 0.121401     | 0.0586879  | 0.419191   | 0.140003     | 0.130702  | ATP-dependent RNA helicase                     |
| XP_009689957.1 | 0.00437232  | 0.572463   | 0.00763773   | 0.011979   | 0.563146   | 0.0212717    | 0.014455  | transcription or splicing factor-like protein  |
| XP_009689958.1 | 0.0525783   | 0.49301    | 0.106648     | 0.0626362  | 0.486202   | 0.128828     | 0.117738  | eukaryotic initiation factor-2 alpha kinase-A  |
| XP_009689959.1 | 0.0479537   | 0.347206   | 0.138113     | 0.0688828  | 0.348139   | 0.19786      | 0.167987  | U1 snRNP-specific protein C                    |
| XP_009689960.1 | 0.000029819 | 0.029819   | 0.001        | 0.00634346 | 0.013222   | 0.479767     | 0.240383  | conserved hypothetical protein                 |
| XP_009689961.1 | 0.0486012   | 0.251784   | 0.193027     |            |            |              | 0.193027  | conserved hypothetical protein                 |
| XP_009689962.1 | 0.0898877   | 0.274196   | 0.327823     |            |            |              | 0.327823  | conserved hypothetical protein                 |
| XP_009689963.1 | 0.0435837   | 0.526178   | 0.0828306    | 0.0519353  | 0.703776   | 0.0737953    | 0.078313  | pre-mRNA splicing protein                      |
| XP_009689964.1 | 0.0196879   | 0.48632    | 0.0404836    | 0.00630234 | 0.36329    | 0.017348     | 0.028916  | L-lactate dehydrogenase                        |
| XP_009689965.1 | 0.0976311   | 0.521026   | 0.187382     | 0.0701016  | 0.602166   | 0.116416     | 0.151899  | uncharacterized protein                        |
| XP_009689966.1 | 0.0562155   | 0.521207   | 0.107856     | 0.0553509  | 0.412773   | 0.134095     | 0.120975  | uncharacterized protein                        |

| protein_id     | Chitose_ka | Chitose_ks | Chitose_kaks | Buffeli_ka  | Buffeli_ks  | Buffeli_kaks | mean_kaks  | function                            |
|----------------|------------|------------|--------------|-------------|-------------|--------------|------------|-------------------------------------|
| XP_009689967.1 | 0.187764   | 0.424843   | 0.441961     | 0.165018    | 0.394225    | 0.418587     | 0.430274   | conserved hypothetical protein      |
| XP_009689968.1 | 0.0423385  | 0.411723   | 0.102833     | 0.0353021   | 0.398457    | 0.0885971    | 0.095715   | uncharacterized protein             |
| XP_009689969.1 | 0.0540315  | 0.38583    | 0.140039     | 0.0486532   | 0.269724    | 0.180381     | 0.16021    | uncharacterized protein             |
| XP_009689970.1 | 0.0453298  | 1.00153    | 0.0452604    | 0.0424886   | 0.932067    | 0.0455853    | 0.045423   | uncharacterized protein             |
| XP_009689971.1 | 0.0444655  | 0.563558   | 0.0789014    | 0.0371955   | 0.454803    | 0.0817836    | 0.080342   | ribonuclease P subunit              |
| XP_009689972.1 | 0.0250731  | 0.755577   | 0.0331841    | 0.0208999   | 0.659867    | 0.0316729    | 0.032428   | homeodomain-like containing protein |
| XP_009689973.1 | 0.0723636  | 0.889469   | 0.0813559    | 0.0698586   | 0.749801    | 0.0931695    | 0.087263   | ethanolamine phosphotransferase     |
| XP_009689974.1 | 0.0545138  | 0.33945    | 0.160594     | 0.0673824   | 0.317877    | 0.211977     | 0.186285   | conserved hypothetical protein      |
| XP_009689975.1 | 0.0271713  | 0.498892   | 0.0544632    | 0.0257714   | 0.48292     | 0.0533659    | 0.053915   | uncharacterized protein             |
| XP_009689976.1 | 0.0587919  | 0.405167   | 0.145105     | 0.0480542   | 0.364682    | 0.13177      | 0.138437   | uncharacterized protein             |
| XP_009689977.1 | 0.0669413  | 0.47012    | 0.142392     | 0.0496448   | 0.509835    | 0.0973742    | 0.119883   | conserved hypothetical protein      |
| XP_009689978.1 | 0.0422732  | 0.389933   | 0.108411     | 0.0237481   | 0.316174    | 0.0751107    | 0.091761   | uncharacterized protein             |
| XP_009689979.1 | 0.0288779  | 0.441531   | 0.065404     | 0.0293976   | 0.470774    | 0.0624453    | 0.063925   | lipoate-protein ligase              |
| XP_009689980.1 | 0.0172171  | 0.423002   | 0.0407021    | 0.0155247   | 0.391346    | 0.0396701    | 0.040186   | uncharacterized protein             |
| XP_009689981.1 |            |            |              | 0.0274922   | 0.180914    | 0.151963     | 0.151963   | uncharacterized protein             |
| XP_009689982.1 | 0.0453058  | 0.448928   | 0.10092      | 0.0163893   | 0.338859    | 0.0483661    | 0.074643   | vesicle transport protein           |
| XP_009689983.1 | 0.0505515  | 0.374027   | 0.135155     | 0.0689737   | 0.350261    | 0.196921     | 0.166038   | ribonucleoside reductase            |
| XP_009689984.1 | 0.0945115  | 0.784748   | 0.120436     | 0.0918609   | 0.455868    | 0.201508     | 0.160972   | hypothetical protein                |
| XP_009689985.1 | 0.0847672  | 0.344351   | 0.246165     | 0.107281    | 0.545637    | 0.196616     | 0.22139    | conserved hypothetical protein      |
| XP_009689986.1 | 0.111592   | 0.424979   | 0.262583     | 0.100495    | 0.25844     | 0.388854     | 0.325719   | conserved hypothetical protein      |
| XP_009689987.1 | 0.0761837  | 0.730523   | 0.104287     | 0.0571054   | 0.901137    | 0.0633704    | 0.083829   | uncharacterized protein             |
| XP_009689988.1 | 0.0608845  | 0.410933   | 0.148162     | 0.0428816   | 0.523704    | 0.0818815    | 0.115022   | uncharacterized protein             |
| XP_009689989.1 | 0.0180324  | 0.434827   | 0.0414704    | 0.0141365   | 0.36298     | 0.0389456    | 0.040208   | RNA-binding protein                 |
| XP_009689990.1 | 0.0176188  | 0.73652    | 0.0239217    | 0.0202749   | 0.859302    | 0.0235947    | 0.023758   | cell-cycle-control protein          |
| XP_009689991.1 | 0.00413023 | 0.295446   | 0.0139797    | 0.00380028  | 0.261597    | 0.0145272    | 0.014253   | 30S ribosomal protein S8            |
| XP_009689992.1 | 0.00378546 | 0.475118   | 0.00796741   | 0.000426645 | 0.426645    | 0.001        | 0.004484   | small GTPase                        |
| XP_009689993.1 | 0.0271998  | 0.7356     | 0.0369764    | 0.0315716   | 0.687569    | 0.0459177    | 0.041447   | uncharacterized protein             |
| XP_009689994.1 | 0.0543925  | 0.601857   | 0.0903745    | 0.0531998   | 0.693404    | 0.0767226    | 0.083549   | uncharacterized protein             |
| XP_009689995.1 | 0.0276079  | 0.236131   | 0.116918     | 0.0197885   | 0.149602    | 0.132274     | 0.124596   | conserved hypothetical protein      |
| XP_009689996.1 | 0.0480842  | 0.28915    | 0.166295     | 0.030903    | 0.306947    | 0.100679     | 0.133487   | conserved hypothetical protein      |
| XP_009689997.1 | 0.0441027  | 0.271944   | 0.162176     | 0.01802     | 0.0703694   | 0.256077     | 0.209126   | uncharacterized protein             |
| XP_009689998.1 | 0.036615   | 0.175668   | 0.208434     | 0.081427    | 0.165372    | 0.492386     | 0.35041    | conserved hypothetical protein      |
| XP_009689999.1 | 0.0798201  | 0.473358   | 0.168625     | 0.0488425   | 0.439488    | 0.111135     | 0.13988    | uncharacterized protein             |
| XP_009690000.1 | 0.0508223  | 0.472239   | 0.10762      | 0.0548901   | 0.537932    | 0.102039     | 0.104829   | uncharacterized protein             |
| XP_009690001.1 | 0.0529201  | 0.327571   | 0.161553     | 0.0866689   | 0.221176    | 0.391855     | 0.276704   | uncharacterized protein             |
| XP_009690002.1 | 0.0534516  | 0.214084   | 0.249677     |             |             |              |            | conserved hypothetical protein      |
| XP_009690003.1 | 0.0155137  | 0.158791   | 0.0976986    | 0.0208906   | 0.214747    | 0.0972803    | 0.097489   | cyclin                              |
| XP_009690004.1 | 0.160489   | 0.474358   | 0.33833      | 0.133701    | 0.482499    | 0.2771       | 0.307715   | conserved hypothetical protein      |
| XP_009690005.1 | 0.0755209  | 0.529736   | 0.142563     | 0.0651565   | 0.35564     | 0.183209     | 0.162886   | conserved hypothetical protein      |
| XP_009690006.1 | 0.00432907 | 0.34422    | 0.00432907   | 0.0125764   | 0.00223794  | 0.377951     | 0.00592124 | phosphatidylserine decarboxylase    |
| XP_009690010.1 | 0.0512524  | 0.0932756  | 0.549473     |             |             |              | 0.549473   | hypothetical protein                |
| XP_009690011.1 | 0.0996441  | 0.37253    | 0.26748      |             |             |              | 0.26748    | uncharacterized protein             |
| XP_009690012.1 | 0.162073   | 0.713199   | 0.227248     | 0.144068    | 0.505266    | 0.285133     | 0.25619    | conserved hypothetical protein      |
| XP_009690013.1 | 0.126308   | 0.428777   | 0.294577     | 0.0880972   | 0.546652    | 0.161158     | 0.227868   | hypothetical protein                |
| XP_009690014.1 |            |            |              | 0.0719506   | 0.215101    | 0.334497     | 0.334497   | conserved hypothetical protein      |
| XP_009690015.1 |            |            |              | 0.00701388  | 0.000140278 | 49.9999      | 49.9999    | hypothetical protein                |
| XP_009690016.1 | 0.109385   | 0.875729   | 0.124907     | 0.10392     | 0.702399    | 0.14795      | 0.136429   | conserved hypothetical protein      |
| XP_009690017.1 | NA         | NA         | NA           |             |             |              | NA         | hypothetical protein                |
| XP_009690018.1 | 0.0888881  | 0.161533   | 0.550279     |             |             |              | 0.550279   | uncharacterized protein             |
| XP_009690034.1 | 0.0482727  | 1.22988    | 0.0392498    |             |             |              | 0.0392498  | uncharacterized protein             |
| XP_009690035.1 | 0.0634935  | 1.01658    | 0.0624576    | 0.0679762   | 0.845832    | 0.0803662    | 0.071412   | conserved hypothetical protein      |
| XP_009690036.1 | 0.0965506  | 0.582998   | 0.165611     |             |             |              | 0.165611   | conserved hypothetical protein      |
| XP_009690037.1 | 0.0850913  | 0.444497   | 0.191433     | 0.0804234   | 0.489803    | 0.164196     | 0.177814   | conserved hypothetical protein      |

| protein_id     | Chitose_ka  | Chitose_ks | Chitose_kaks | Buffeli_ka  | Buffeli_ks | Buffeli_kaks | mean_kaks | function                                            |
|----------------|-------------|------------|--------------|-------------|------------|--------------|-----------|-----------------------------------------------------|
| XP_009690038.1 | 0.0897916   | 0.400526   | 0.224184     | 0.101253    | 0.317593   | 0.318815     | 0.2715    | uncharacterized protein                             |
| XP_009690040.1 |             |            |              | 0.134247    | 0.406921   | 0.329911     | 0.329911  | conserved hypothetical protein                      |
| XP_009690041.1 | 0.0809992   | 0.736565   | 0.109969     | 0.0576036   | 0.72334    | 0.0796356    | 0.094802  | uncharacterized protein                             |
| XP_009690042.1 | 0.134603    | 0.488578   | 0.2755       | 0.169237    | 0.531018   | 0.318702     | 0.297101  | conserved hypothetical protein                      |
| XP_009690043.1 | 0.109632    | 0.504421   | 0.217342     | 0.116943    | 0.489229   | 0.239034     | 0.228188  | conserved hypothetical protein                      |
| XP_009690044.1 | 0.0628845   | 0.4616     | 0.136232     | 0.0568874   | 0.419717   | 0.135537     | 0.135884  | conserved hypothetical protein                      |
| XP_009690045.1 | 0.0267851   | 0.46928    | 0.0570771    | 0.0295686   | 0.428735   | 0.0689671    | 0.063022  | uncharacterized protein                             |
| XP_009690046.1 | 0.0861106   | 0.518823   | 0.165973     | 0.0669047   | 0.58875    | 0.113639     | 0.139806  | conserved hypothetical protein                      |
| XP_009690047.1 | 0.0295338   | 0.679124   | 0.043488     | 0.0287451   | 0.669785   | 0.0429169    | 0.043202  | ubiquitin-transferase                               |
| XP_009690048.1 | 0.0838267   | 0.371174   | 0.225842     | 0.0696445   | 0.386867   | 0.180022     | 0.202932  | conserved hypothetical protein                      |
| XP_009690049.1 | 0.0300552   | 0.343387   | 0.0875256    | 0.0351299   | 0.334428   | 0.105045     | 0.096285  | conserved hypothetical protein                      |
| XP_009690050.1 | 0.0772528   | 0.514921   | 0.150028     | 0.0715759   | 0.470302   | 0.152191     | 0.15111   | conserved hypothetical protein                      |
| XP_009690051.1 | 0.048239    | 0.608391   | 0.0792895    | 0.0440445   | 0.602417   | 0.073113     | 0.076201  | conserved hypothetical protein                      |
| XP_009690052.1 | 0.00865039  | 0.425597   | 0.0203253    | 0.00975735  | 0.544989   | 0.0179037    | 0.019114  | vacuolar ATP synthase                               |
| XP_009690053.1 | 0.0285976   | 0.447319   | 0.0639311    | 0.0318086   | 0.292209   | 0.108856     | 0.086394  | thioredoxin                                         |
| XP_009690054.1 | 0.000255716 | 0.255716   | 0.001        | 6.98577E-05 | 0.0698577  | 0.001        | 0.001     | protein yippee-like 1                               |
| XP_009690055.1 | 0.0042328   | 0.553425   | 0.00764838   | 0.00530114  | 0.453391   | 0.0116922    | 0.00967   | histone deacetylase                                 |
| XP_009690056.1 | 0.0409916   | 0.230438   | 0.177885     | 0.0344782   | 0.216275   | 0.159418     | 0.168652  | uncharacterized protein                             |
| XP_009690057.1 | 0.0216624   | 0.36803    | 0.0588604    | 0.0270476   | 0.503172   | 0.0537542    | 0.056307  | conserved hypothetical protein                      |
| XP_009690058.1 | 0.00614225  | 0.470946   | 0.0130424    | 0.00173194  | 0.518926   | 0.00333755   | 0.00819   | serine/threonine protein phosphatase pp-x isozyme 1 |
| XP_009690059.1 | 0.0645259   | 0.688387   | 0.0937348    | 0.0558008   | 0.539585   | 0.103414     | 0.098574  | histone                                             |
| XP_009690060.1 | 0.0020794   | 0.457536   | 0.00454478   | 0.000315409 | 0.315409   | 0.001        | 0.002772  | cytochrome Coxidase subunit                         |
| XP_009690061.1 | 0.0416559   | 0.603201   | 0.069058     | 0.0197766   | 0.472555   | 0.0418505    | 0.055454  | aspartate aminotransferase%2C cytoplasmic           |
| XP_009690062.1 | 0.0309541   | 0.408817   | 0.0757163    | 0.0232383   | 0.44339    | 0.0524105    | 0.064063  | uncharacterized protein                             |
| XP_009690063.1 | 0.0354813   | 0.413187   | 0.0858721    | 0.0338619   | 0.4051     | 0.0835889    | 0.084731  | putative peptidyl-prolyl cis-trans isomerase taCyp  |
| XP_009690065.1 | 0.0625335   | 0.688814   | 0.0907843    | 0.0604065   | 0.650604   | 0.0928467    | 0.091815  | conserved hypothetical protein                      |
| XP_009690066.1 | 0.0940897   | 0.717074   | 0.131213     | 0.0987847   | 0.751186   | 0.131505     | 0.131359  | uncharacterized protein                             |
| XP_009690067.1 | 0.0103749   | 0.740972   | 0.0140017    | 0.00684652  | 0.829782   | 0.00825098   | 0.011126  | actin II                                            |
| XP_009690068.1 | 0.0393837   | 0.561435   | 0.0701483    | 0.0283394   | 0.566625   | 0.0500144    | 0.060081  | deoxyhypusine synthase                              |
| XP_009690069.1 | 0.121421    | 0.492367   | 0.246607     | 0.107489    | 0.537496   | 0.19998      | 0.223293  | uncharacterized protein                             |
| XP_009690070.1 | 0.0253893   | 0.567273   | 0.0447567    | 0.0286128   | 0.608345   | 0.0470338    | 0.045895  | glycylpeptide N-tetradecanoyltransferase 1          |
| XP_009690071.1 | 0.067995    | 0.459859   | 0.147861     | 0.0746307   | 0.498316   | 0.149766     | 0.148813  | uncharacterized protein                             |
| XP_009690072.1 | 0.0381523   | 0.53371    | 0.071485     | 0.0376878   | 0.557271   | 0.0676292    | 0.069557  | inorganic pyrophosphatase                           |
| XP_009690073.1 | 0.0405128   | 0.963623   | 0.0420422    | 0.0502132   | 0.945421   | 0.053112     | 0.047577  | conserved hypothetical protein                      |
| XP_009690074.1 | 0.0279725   | 0.60661    | 0.0461128    | 0.0205973   | 0.6543     | 0.0314799    | 0.038796  | uncharacterized protein                             |
| XP_009690075.1 | 0.00383409  | 0.549928   | 0.00697199   | 0.000536467 | 0.536467   | 0.001        | 0.003986  | 40S ribosomal protein S15A                          |
| XP_009690076.1 | 0.12991     | 0.392558   | 0.330933     | 0.0386979   | 0.119602   | 0.323557     | 0.327245  | hypothetical protein                                |
| XP_009690077.1 | 0.0475791   | 0.707562   | 0.0672438    | 0.0490467   | 0.707114   | 0.0693618    | 0.068303  | uncharacterized protein                             |
| XP_009690078.1 | 0.0344904   | 0.484207   | 0.0712307    | 0.0340033   | 0.495068   | 0.068684     | 0.069957  | uncharacterized protein                             |
| XP_009690079.1 | 0.0490037   | 0.719204   | 0.068136     | 0.0392624   | 0.524599   | 0.0748428    | 0.071489  | uncharacterized protein                             |
| XP_009690080.1 | 0.0539782   | 0.622893   | 0.0866573    | 0.0504954   | 0.581165   | 0.0868865    | 0.086772  | uncharacterized protein                             |
| XP_009690081.1 | 0.0562487   | 0.179927   | 0.31262      | 0.0582562   | 0.263293   | 0.22126      | 0.26694   | conserved hypothetical protein                      |
| XP_009690082.1 | 0.0467436   | 0.345255   | 0.135389     | 0.0575444   | 0.353954   | 0.162576     | 0.148983  | conserved hypothetical protein                      |
| XP_009690083.1 | 0.0505356   | 0.812348   | 0.0622093    | 0.0427692   | 0.70308    | 0.0608311    | 0.06152   | 1-deoxy-D-xylulose 5-phosphate reducto-isomerase    |
| XP_009690084.1 | 0.0397568   | 0.353023   | 0.112618     | 0.043446    | 0.511296   | 0.0849724    | 0.098795  | conserved hypothetical protein                      |
| XP_009690085.1 | 0.0154355   | 0.853558   | 0.0180837    | 0.0112242   | 0.825276   | 0.0136006    | 0.015842  | uncharacterized protein                             |
| XP_009690086.1 | 0.035117    | 0.557288   | 0.0630141    | 0.0307079   | 0.532206   | 0.0576994    | 0.060357  | homeodomain-like containing protein                 |
| XP_009690087.1 | 0.0658982   | 0.785583   | 0.0838844    | 0.0623897   | 0.805436   | 0.0774608    | 0.080673  | uncharacterized protein                             |
| XP_009690088.1 | 0.235795    | 0.262985   | 0.896608     |             |            |              | 0.896608  | hypothetical protein                                |
| XP_009690089.1 | 0.00944359  | 0.428596   | 0.0220338    | 0.00946178  | 0.565714   | 0.0167254    | 0.01938   | 60S ribosomal protein L27                           |
| XP_009690090.1 | 0.0742759   | 0.550697   | 0.134876     | 0.0685405   | 0.600116   | 0.114212     | 0.124544  | conserved hypothetical protein                      |
| XP_009690091.1 | 0.170407    | 0.447944   | 0.380421     | 0.131045    | 0.367489   | 0.356595     | 0.368508  | conserved hypothetical protein                      |
| XP_009690092.1 | NA          | NA         | NA           |             |            |              | NA        | ribosomal protein L29                               |

| protein_id     | Chitose_ka  | Chitose_ks | Chitose_kaks | Buffeli_ka  | Buffeli_ks | Buffeli_kaks | mean_kaks | function                                    |
|----------------|-------------|------------|--------------|-------------|------------|--------------|-----------|---------------------------------------------|
| XP_009690093.1 | NA          | NA         | NA           |             |            |              | NA        | hypothetical protein                        |
| XP_009690094.1 | 0.0366922   | 0.458186   | 0.0800814    | 0.0279294   | 0.628335   | 0.0444498    | 0.062266  | conserved hypothetical protein              |
| XP_009690095.1 | 0.165643    | 0.0378918  | 4.37147      | 0.192424    | 0.00384849 | 50           | 27.185735 | hypothetical protein                        |
| XP_009690096.1 | 0.0070464   | 0.641218   | 0.0109891    | 0.00761922  | 0.645558   | 0.0118025    | 0.011396  | 60S ribosomal protein L5                    |
| XP_009690097.1 | 0.00731988  | 0.597616   | 0.0122485    | 0.00554227  | 0.616914   | 0.00898386   | 0.010616  | 60S ribosomal protein L7a                   |
| XP_009690098.1 | 0.125806    | 0.0623998  | 2.01613      |             |            |              | 2.01613   | hypothetical protein                        |
| XP_009690099.1 | 0.0732602   | 0.398842   | 0.183682     | 0.0756671   | 0.41315    | 0.183147     | 0.183415  | conserved hypothetical protein              |
| XP_009690100.1 | 0.0759423   | 0.391377   | 0.194039     | 0.0816151   | 0.50965    | 0.16014      | 0.17709   | uncharacterized protein                     |
| XP_009690101.1 | 0.109087    | 0.475547   | 0.229393     | 0.105119    | 0.609257   | 0.172536     | 0.200964  | uncharacterized protein                     |
| XP_009690102.1 | 0.051707    | 0.771672   | 0.0670064    | 0.023879    | 0.851729   | 0.0280359    | 0.047521  | arginine N-methyltransferase                |
| XP_009690103.1 | 0.00569728  | 0.505032   | 0.011281     | 0.00304059  | 0.394228   | 0.00771277   | 0.009497  | 60S ribosomal protein L21                   |
| XP_009690104.1 | 0.0348382   | 0.263716   | 0.132105     | 0.0299455   | 0.385268   | 0.0777263    | 0.104916  | transcription factor                        |
| XP_009690105.1 | 0.0708115   | 0.293239   | 0.241481     | 0.0728268   | 0.289212   | 0.251811     | 0.246646  | uncharacterized protein                     |
| XP_009690106.1 | 0.0647289   | 0.224728   | 0.288033     | 0.118055    | 0.482984   | 0.244428     | 0.26623   | hypothetical protein                        |
| XP_009690107.1 | 0.0734382   | 0.273319   | 0.268691     |             |            |              | 0.268691  | hypothetical protein                        |
| XP_009690108.1 | 0.00230225  | 0.225551   | 0.0102072    |             |            |              | 0.0102072 | predicted protein                           |
| XP_009690109.1 | 0.0132889   | 0.373417   | 0.0355874    |             |            |              | 0.0355874 | 50S ribosomal protein L24                   |
| XP_009690110.1 | 0.0313399   | 0.547357   | 0.0572568    | 0.0223146   | 0.483532   | 0.0461491    | 0.051703  | replication factor-A protein 1              |
| XP_009690111.1 | 0.00837322  | 0.41014    | 0.0204155    | 0.0111325   | 0.414588   | 0.0268519    | 0.023634  | molecular chaperone DnaJ                    |
| XP_009690112.1 | 0.0776658   | 0.397062   | 0.195601     | 0.0865961   | 0.426226   | 0.203169     | 0.199385  | uncharacterized protein                     |
| XP_009690113.1 | 0.123172    | 0.369507   | 0.333342     | 0.069275    | 0.475168   | 0.14579      | 0.239566  | uncharacterized protein                     |
| XP_009690114.1 | 0.0717822   | 0.443518   | 0.161847     | 0.0545793   | 0.321993   | 0.169505     | 0.165676  | uncharacterized protein                     |
| XP_009690115.1 | 0.096702    | 0.430944   | 0.224396     | 0.0893262   | 0.531345   | 0.168113     | 0.196254  | uncharacterized protein                     |
| XP_009690116.1 | 0.0575623   | 0.78231    | 0.0735799    |             |            |              | 0.0735799 | hypothetical protein                        |
| XP_009690117.1 | 0.0571328   | 0.0173344  | 3.29592      |             |            |              | 3.29592   | conserved hypothetical protein              |
| XP_009690118.1 | 0.0538452   | 0.480425   | 0.112078     | 0.0432181   | 0.532042   | 0.0812307    | 0.096654  | uncharacterized protein                     |
| XP_009690119.1 | 0.0406853   | 0.404108   | 0.100679     | 0.0114439   | 0.138159   | 0.0828315    | 0.091755  | uncharacterized protein                     |
| XP_009690120.1 | 0.0357447   | 0.27322    | 0.130828     | 0.0768954   | 0.33739    | 0.227913     | 0.17937   | conserved hypothetical protein              |
| XP_009690121.1 | 0.0427043   | 0.400909   | 0.106519     | 0.044233    | 0.376954   | 0.117343     | 0.111931  | integral membrane protein                   |
| XP_009690122.1 | 0.0455564   | 0.434422   | 0.104867     | 0.0217535   | 0.34703    | 0.0626848    | 0.083776  | U6 snRNA-associated sm-like protein Lsm3    |
| XP_009690123.1 | 0.0387065   | 0.705409   | 0.054871     | 0.030993    | 0.586587   | 0.0528362    | 0.053854  | long-chain acyl-CoA synthetase              |
| XP_009690124.1 | 0.12349     | 0.4835     | 0.255408     | 0.157358    | 0.713268   | 0.220615     | 0.238012  | conserved hypothetical protein              |
| XP_009690125.1 | 0.0836353   | 0.625017   | 0.133813     | 0.0735515   | 0.514579   | 0.142935     | 0.138374  | conserved hypothetical protein              |
| XP_009690126.1 | 0.0416928   | 0.425434   | 0.0980005    | 0.0322553   | 0.336754   | 0.095783     | 0.096892  | ubiquitin carboxyl-terminal hydrolase       |
| XP_009690127.1 | 0.104656    | 0.401562   | 0.260622     | 0.100227    | 0.385784   | 0.259802     | 0.260212  | conserved hypothetical protein              |
| XP_009690128.1 | 0.0252188   | 0.866055   | 0.0291192    | 0.0216242   | 0.891588   | 0.0242536    | 0.026686  | replication licensing factor                |
| XP_009690129.1 | 0.0191792   | 0.300369   | 0.0638524    | 0.0120062   | 0.28746    | 0.0417666    | 0.05281   | conserved hypothetical protein              |
| XP_009690130.1 | 0.071655    | 0.624657   | 0.114711     | 0.0663297   | 0.614788   | 0.10789      | 0.1113    | conserved hypothetical protein              |
| XP_009690131.1 | 0.0783622   | 0.698715   | 0.112152     | 0.0414984   | 0.821836   | 0.0504948    | 0.081323  | hypothetical protein                        |
| XP_009690132.1 | 0.0396923   | 0.584105   | 0.0679541    | 0.0339952   | 0.530397   | 0.0640938    | 0.066024  | uncharacterized protein                     |
| XP_009690133.1 | 0.0402193   | 0.490946   | 0.081922     | 0.018408    | 0.392135   | 0.046943     | 0.064433  | conserved hypothetical protein              |
| XP_009690134.1 | NA          | NA         | NA           |             |            |              | NA        | hypothetical protein                        |
| XP_009690135.1 | 0.0391468   | 0.869039   | 0.045046     | 0.0369683   | 0.790729   | 0.0467522    | 0.045899  | uncharacterized protein                     |
| XP_009690137.1 | NA          | NA         | NA           |             |            |              | NA        | hypothetical protein                        |
| XP_009690138.1 | 0.0241738   | 0.950964   | 0.0254203    | 0.0240915   | 0.7633     | 0.0315623    | 0.028491  | uncharacterized protein                     |
| XP_009690139.1 | 0.00023778  | 0.23778    | 0.001        | 6.64969E-05 | 0.0664969  | 0.001        | 0.001     | uncharacterized protein                     |
| XP_009690140.1 | 0.137987    | 0.576664   | 0.239284     | 0.107942    | 0.616027   | 0.175223     | 0.207253  | uncharacterized protein                     |
| XP_009690141.1 | 0.000364734 | 0.364734   | 0.001        | 0.000587428 | 0.587428   | 0.001        | 0.001     | eukaryotic translation initiation factor 4a |
| XP_009690142.1 | 0.0306045   | 0.368869   | 0.0829685    | 0.0276641   | 0.30629    | 0.0903199    | 0.086644  | methionine-tRNA ligase                      |
| XP_009690143.1 | 0.0599476   | 0.527213   | 0.113706     | 0.0676887   | 0.614917   | 0.110078     | 0.111892  | conserved hypothetical protein              |
| XP_009690144.1 | 0.00484328  | 0.626539   | 0.00773021   | 0.010323    | 0.808553   | 0.0127672    | 0.010249  | uncharacterized protein                     |
| XP_009690145.1 | 0.0847888   | 0.482735   | 0.175643     | 0.0634047   | 0.381342   | 0.166267     | 0.170955  | conserved hypothetical protein              |
| XP_009690146.1 | 0.00497566  | 0.208703   | 0.0238409    | 0.00532897  | 0.226872   | 0.0234889    | 0.023665  | conserved hypothetical protein              |

| protein_id     | Chitose_ka | Chitose_ks | Chitose_kaks | Buffeli_ka | Buffeli_ks | Buffeli_kaks | mean_kaks | function                                                |
|----------------|------------|------------|--------------|------------|------------|--------------|-----------|---------------------------------------------------------|
| XP_009690147.1 | 0.0463923  | 0.537074   | 0.0863798    | 0.0670377  | 0.47498    | 0.141138     | 0.113759  | DNA-damage inducible protein                            |
| XP_009690148.1 | 0.045684   | 0.567166   | 0.0805479    | 0.0352009  | 0.517486   | 0.0680229    | 0.074285  | conserved hypothetical protein                          |
| XP_009690149.1 | 0.0585452  | 0.564047   | 0.103795     | 0.0496065  | 0.575226   | 0.0862384    | 0.095017  | conserved hypothetical protein                          |
| XP_009690150.1 | 0.0312727  | 0.394099   | 0.0793526    | 0.0274263  | 0.362815   | 0.075593     | 0.077473  | conserved hypothetical protein                          |
| XP_009690151.1 | 0.098369   | 0.303437   | 0.324183     | 0.0920544  | 0.236154   | 0.389807     | 0.356995  | conserved hypothetical protein                          |
| XP_009690152.1 | 0.0187905  | 0.572583   | 0.0328171    | 0.0194749  | 0.509642   | 0.0382128    | 0.035515  | pyruvate kinase                                         |
| XP_009690153.1 | 0.074422   | 0.522874   | 0.142332     | 0.06789    | 0.484879   | 0.140014     | 0.141173  | conserved hypothetical protein                          |
| XP_009690154.1 | 0.0424426  | 0.481017   | 0.0882351    | 0.0330219  | 0.378595   | 0.0872224    | 0.087729  | uncharacterized protein                                 |
| XP_009690155.1 | 0.0879038  | 0.812031   | 0.108252     | 0.0933357  | 0.718693   | 0.129869     | 0.119061  | conserved hypothetical protein                          |
| XP_009690156.1 | 0.0381848  | 0.571674   | 0.0667947    | 0.0309992  | 0.529999   | 0.0584891    | 0.062642  | protein kinase                                          |
| XP_009690157.1 | 0.0420729  | 0.715009   | 0.0588425    | 0.0456862  | 0.825605   | 0.0553367    | 0.05709   | cysteine proteinase                                     |
| XP_009690158.1 | 0.198827   | 0.134824   | 1.47472      |            |            |              | 1.47472   | hypothetical protein                                    |
| XP_009690159.1 | 0.00473529 | 0.313465   | 0.0151063    | 0.00507411 | 0.472156   | 0.0107467    | 0.012927  | putative ADP/ATP transporter                            |
| XP_009690160.1 | 0.0131646  | 0.237886   | 0.0553402    |            |            |              | 0.0553402 | ubiquitin                                               |
| XP_009690161.1 | 0.0092364  | 0.483274   | 0.0191121    | 0.00722892 | 0.35363    | 0.020442     | 0.019777  | uncharacterized protein                                 |
| XP_009690162.1 | 0.0076509  | 0.656734   | 0.0116499    | 0.00608263 | 0.582251   | 0.0104467    | 0.011048  | DNA repair helicase                                     |
| XP_009690163.1 | 0.10302    | 0.35095    | 0.293546     | 0.088829   | 0.305799   | 0.290482     | 0.292014  | conserved hypothetical protein                          |
| XP_009690164.1 | 0.0546577  | 0.5585     | 0.0978652    | 0.0619532  | 0.68206    | 0.0908324    | 0.094349  | histone acetyltransferase-like protein                  |
| XP_009690166.1 | 0.00716564 | 0.960167   | 0.00746291   | 0.00475753 | 0.86306    | 0.0055124    | 0.006488  | heat shock protein                                      |
| XP_009690168.1 | 0.0865734  | 1.07679    | 0.0865734    | 0.0803994  | 0.0683362  | 1.77684      | 0.0384594 | possible RING-finger-like protein                       |
| XP_009690169.1 | 0.085846   | 0.484742   | 0.177096     | 0.0655239  | 0.457243   | 0.143302     | 0.160199  | conserved hypothetical protein                          |
| XP_009690170.1 | 0.0759751  | 0.493639   | 0.153908     | 0.074583   | 0.500693   | 0.14896      | 0.151434  | conserved hypothetical protein                          |
| XP_009690171.1 | 0.0499655  | 0.35179    | 0.142032     | 0.0384769  | 0.315264   | 0.122047     | 0.13204   | conserved hypothetical protein                          |
| XP_009690172.1 | NA         | NA         | NA           | NA         | NA         | NA           | NA        | NA                                                      |
| XP_009690173.1 | 0.0753434  | 0.435903   | 0.172844     | 0.06072    | 0.507359   | 0.119679     | 0.146261  | DNA repair protein Rad50                                |
| XP_009690174.1 | 0.0073805  | 1.16511    | 0.00633458   | 0.00759874 | 1.07871    | 0.00704428   | 0.006689  | DNA repair protein Rad50                                |
| XP_009690175.1 | 0.118887   | 0.336159   | 0.353663     | 0.107796   | 0.521952   | 0.206525     | 0.280094  | uncharacterized protein                                 |
| XP_009690176.1 | 0.00422133 | 0.11255    | 0.00422133   | 0.0375063  |            |              | 0.0375063 | ubiquitin carrier protein                               |
| XP_009690177.1 | 0.0406917  | 0.833563   | 0.0488166    | 0.0399299  | 0.918286   | 0.0434831    | 0.04615   | coatome complex subunit alpha                           |
| XP_009690178.1 | 0.00750398 | 0.446324   | 0.0168129    | 0.0786095  | 0.378271   | 0.207813     | 0.112313  | conserved hypothetical protein                          |
| XP_009690180.1 | 0.0379108  | 0.360975   | 0.105023     | 0.0346734  | 0.394738   | 0.087839     | 0.096431  | conserved hypothetical protein                          |
| XP_009690181.1 | 0.0984254  | 0.384452   | 0.256015     | 0.0880077  | 0.306756   | 0.286898     | 0.271456  | uncharacterized protein                                 |
| XP_009690182.1 | 0.0516793  | 0.89468    | 0.0577628    | 0.0489752  | 0.950459   | 0.0515279    | 0.054645  | 5'-3' exoribonuclease 2                                 |
| XP_009690183.1 | 0.0470011  | 0.313236   | 0.15005      | 0.0401685  | 0.406009   | 0.0989352    | 0.124493  | uncharacterized protein                                 |
| XP_009690184.1 | 0.0626992  | 0.494876   | 0.126697     | 0.0543971  | 0.459625   | 0.118351     | 0.122524  | phenylalanyl-tRNA synthetase                            |
| XP_009690185.1 | 0.0415629  | 0.645814   | 0.0643574    | 0.0264721  | 0.593065   | 0.044636     | 0.054497  | uncharacterized protein                                 |
| XP_009690186.1 | 0.0560794  | 0.378552   | 0.148142     | 0.0618761  | 0.423013   | 0.146275     | 0.147208  | dihydroorotate dehydrogenase%2C mitochondrial precursor |
| XP_009690187.1 | 0.0206302  | 0.520623   | 0.039626     | 0.0232961  | 0.547141   | 0.0425779    | 0.041102  | N-ethylmaleimide-sensitive factor                       |
| XP_009690188.1 | 0.0876095  | 0.505863   | 0.173188     | 0.0711127  | 0.48459    | 0.146748     | 0.159968  | conserved hypothetical protein                          |
| XP_009690189.1 | 0.0205159  | 0.656583   | 0.0312464    | 0.0223666  | 0.705339   | 0.0317104    | 0.031478  | uncharacterized protein                                 |
| XP_009690190.1 | NA         | NA         | NA           | NA         | NA         | NA           | NA        | hypothetical protein                                    |
| XP_009690191.1 | 0.0384682  | 0.893435   | 0.0430565    | 0.038027   | 0.965539   | 0.0393842    | 0.04122   | protein kinase                                          |
| XP_009690192.1 | 0.123345   | 0.5422     | 0.22749      | 0.143936   | 0.669024   | 0.215144     | 0.221317  | uncharacterized protein                                 |
| XP_009690193.1 | NA         | NA         | NA           | NA         | NA         | NA           | NA        | uncharacterized protein                                 |
| XP_009690194.1 | 0.0268759  | 0.726999   | 0.0369683    | 0.0210439  | 0.655768   | 0.0320905    | 0.034529  | translation initiation factor IF-2                      |
| XP_009690195.1 | 0.0788827  | 0.437876   | 0.180148     | 0.0738551  | 0.375488   | 0.196691     | 0.18842   | uncharacterized protein                                 |
| XP_009690196.1 | 0.0623498  | 0.810582   | 0.0769198    | 0.0529614  | 0.865872   | 0.0611654    | 0.069043  | uncharacterized protein                                 |
| XP_009690197.1 | 0.043678   | 0.276102   | 0.158195     |            |            |              | 0.158195  | uncharacterized protein                                 |
| XP_009690198.1 | 0.164467   | 0.554647   | 0.296525     | 0.170051   | 0.600435   | 0.283212     | 0.289868  | conserved hypothetical protein                          |
| XP_009690199.1 | 0.0580986  | 0.33194    | 0.175028     | 0.0700032  | 0.448981   | 0.155916     | 0.165472  | conserved hypothetical protein                          |
| XP_009690200.1 | 0.052928   | 0.702323   | 0.0753613    | 0.0637218  | 0.708888   | 0.0898897    | 0.082626  | uncharacterized protein                                 |
| XP_009690201.1 | 0.0523407  | 0.326206   | 0.160453     | 0.0726931  | 0.504927   | 0.143968     | 0.152211  | 50S ribosomal protein L24                               |
| XP_009690202.1 | 0.0905062  | 0.570322   | 0.158693     | 0.0823795  | 0.508756   | 0.161923     | 0.160308  | conserved hypothetical protein                          |



| protein_id     | Chitose_ka | Chitose_ks | Chitose_kaks | Buffeli_ka  | Buffeli_ks | Buffeli_kaks | mean_kaks | function                                                          |
|----------------|------------|------------|--------------|-------------|------------|--------------|-----------|-------------------------------------------------------------------|
| XP_009690203.1 | 0.0554365  | 0.459901   | 0.12054      | 0.0457183   | 0.593233   | 0.0770664    | 0.098803  | cyclin-like protein                                               |
| XP_009690204.1 | 0.034801   | 0.698752   | 0.0498045    | 0.0315303   | 0.62962    | 0.0500782    | 0.049941  | serine/threonine protein kinase                                   |
| XP_009690205.1 | 0.0336565  | 0.934675   | 0.0360087    | 0.00838173  | 0.87936    | 0.00953162   | 0.02277   | uncharacterized protein                                           |
| XP_009690206.1 | 0.0625563  | 0.738885   | 0.084663     | 0.0654204   | 0.837492   | 0.0781147    | 0.081389  | erythrocyte membrane-associated malaria antigen-like              |
| XP_009690207.1 | 0.118208   | 0.664355   | 0.177929     | 0.173038    | 0.659483   | 0.262384     | 0.220157  | conserved hypothetical protein                                    |
| XP_009690208.1 | 0.032972   | 0.280464   | 0.117562     | 0.0273782   | 0.232243   | 0.117886     | 0.117724  | glutaredoxin-like protein grla                                    |
| XP_009690209.1 | 0.0511856  | 0.695424   | 0.0736034    | 0.0408425   | 0.629794   | 0.0648506    | 0.069227  | 3-demethylubiquinone-9 3-methyltransferase-like protein           |
| XP_009690210.1 | 0.129763   | 0.465677   | 0.278655     | 0.13835     | 0.565264   | 0.244753     | 0.061704  | conserved hypothetical protein                                    |
| XP_009690211.1 | 0.0528966  | 0.76419    | 0.0692191    | 0.0539627   | 0.576525   | 0.0935999    | 0.081409  | DNA topoisomerase I                                               |
| XP_009690212.1 | 0.0674533  | 0.904657   | 0.0745623    | 0.0674394   | 0.929815   | 0.07253      | 0.073546  | uncharacterized protein                                           |
| XP_009690213.1 | 0.0517531  | 0.880427   | 0.0587818    | 0.0582085   | 0.724189   | 0.0803775    | 0.06958   | 1-phosphatidylinositol-4-phosphate 5-kinase                       |
| XP_009690215.1 | 0.00678494 | 0.2841     | 0.0238822    | 0.00232521  | 0.34023    | 0.00683424   | 0.015358  | proteasome (prosome%2C macropain) 26S subunit%2C non-ATPase%2C 14 |
| XP_009690216.1 | 0.0408495  | 0.391166   | 0.10443      | 0.0503532   | 0.364232   | 0.138245     | 0.121338  | conserved hypothetical protein                                    |
| XP_009690217.1 | 0.0229342  | 0.879801   | 0.0260675    | 0.0183182   | 0.959489   | 0.0190917    | 0.02258   | transcription initiation factor TFIIB                             |
| XP_009690218.1 | 0.0759885  | 0.420307   | 0.180793     | 0.0943589   | 0.414206   | 0.227807     | 0.2043    | conserved hypothetical protein                                    |
| XP_009690219.1 | 0.00653605 | 0.332195   | 0.0196754    | 0.00408109  | 0.425977   | 0.00958056   | 0.014628  | uncharacterized protein                                           |
| XP_009690221.1 | 0.0229299  | 0.474789   | 0.048295     | 0.016492    | 0.633925   | 0.0260157    | 0.037155  | DNA-directed RNA polymerase 2 subunit                             |
| XP_009690222.1 | 0.0288939  | 0.284      | 0.101739     | 0.0264879   | 0.32284    | 0.0820465    | 0.091893  | uncharacterized protein                                           |
| XP_009690223.1 | 0.0141084  | 0.152369   | 0.0925936    |             |            |              | 0.0925936 | conserved hypothetical protein                                    |
| XP_009690224.1 | 0.0596032  | 0.295786   | 0.201508     |             |            |              | 0.201508  | conserved hypothetical protein                                    |
| XP_009690225.1 | 0.0756555  | 0.394471   | 0.19179      | 0.0388568   | 0.208989   | 0.185927     | 0.188858  | uncharacterized protein                                           |
| XP_009690226.1 | 0.0284242  | 0.32923    | 0.0863355    | 0.0489124   | 0.30473    | 0.160511     | 0.123423  | conserved hypothetical protein                                    |
| XP_009690229.1 | 0.0183342  | 0.569714   | 0.0321814    | 0.000250007 | 0.250007   | 0.001        | 0.016591  | maternal g10 transcript                                           |
| XP_009690230.1 | 0.0229621  | 0.565375   | 0.0406139    | 0.0194368   | 0.553593   | 0.0351103    | 0.037862  | mitochondrial processing peptidase subunit alpha                  |
| XP_009690231.1 | 0.11525    | 0.459452   | 0.250841     | 0.0995151   | 0.426916   | 0.233102     | 0.241972  | conserved hypothetical protein                                    |
| XP_009690232.1 | 0.00691579 | 0.662475   | 0.0104393    | 0.000346763 | 0.346763   | 0.001        | 0.00572   | conserved hypothetical protein                                    |
| XP_009690234.1 | 0.0326762  | 0.71814    | 0.0455012    | 0.0232335   | 0.679417   | 0.0341962    | 0.039849  | molecular chaperone DnaJ                                          |
| XP_009690235.1 | 0.0216467  | 0.0855161  | 0.25313      | 0.13835     | 0.110843   | 1.24816      | 0.0750645 | ribosomal protein S29                                             |
| XP_009690236.1 | 0.0275546  | 0.598069   | 0.0460726    | 0.0301487   | 0.705834   | 0.0427136    | 0.044393  | transporter protein cg10                                          |
| XP_009690237.1 | 0.032743   | 0.299923   | 0.109171     | 0.0343598   | 0.389016   | 0.088325     | 0.098748  | conserved hypothetical protein                                    |
| XP_009690238.1 | 0.116113   | 0.711181   | 0.163268     | 0.0555725   | 0.411644   | 0.135001     | 0.149135  | conserved hypothetical protein                                    |
| XP_009690239.1 | 0.0399536  | 0.377653   | 0.105794     | 0.0432778   | 0.452953   | 0.0955457    | 0.10067   | uncharacterized protein                                           |
| XP_009690240.1 | 0.0215331  | 0.462851   | 0.0465227    | 0.0190943   | 0.431605   | 0.0442401    | 0.045381  | uncharacterized protein                                           |
| XP_009690241.1 | 0.0479294  | 0.283227   | 0.169226     | 0.0378712   | 0.315943   | 0.119867     | 0.144546  | uncharacterized protein                                           |
| XP_009690242.1 | 0.0974286  | 0.621736   | 0.156704     | 0.102883    | 0.654381   | 0.157222     | 0.156963  | uncharacterized protein                                           |
| XP_009690243.1 |            |            |              | 0.310417    | 0.324617   | 0.956255     | 0.956255  | hypothetical protein                                              |
| XP_009690244.1 | 0.0461044  | 0.740567   | 0.0622555    | 0.0368289   | 0.660949   | 0.0557212    | 0.058988  | conserved hypothetical protein                                    |
| XP_009690245.1 | 0.0906333  | 0.651684   | 0.139076     | 0.0794908   | 0.711413   | 0.111736     | 0.125406  | uncharacterized protein                                           |
| XP_009690247.1 | 0.00375235 | 0.0542955  | 0.0691098    | 0.045575    | 0.099367   | 0.458653     | 0.263881  | uncharacterized protein                                           |
| XP_009690248.1 | 0.0159261  | 0.105854   | 0.150454     | 0.000357058 | 0.357058   | 0.001        | 0.075727  | 60S ribosomal protein L37                                         |
| XP_009690249.1 | 0.0720335  | 0.432222   | 0.166659     | 0.0702579   | 0.273467   | 0.256916     | 0.211787  | conserved hypothetical protein                                    |
| XP_009690251.1 | 0.052729   | 0.476449   | 0.110671     | 0.0628407   | 0.350013   | 0.179538     | 0.145104  | predicted protein                                                 |
| XP_009690252.1 | 0.101468   | 0.386217   | 0.262722     | 0.121093    | 0.386682   | 0.313158     | 0.28794   | conserved hypothetical protein                                    |
| XP_009690253.1 | 0.0600519  | 0.183819   | 0.32669      | 0.0414532   | 0.372603   | 0.111253     | 0.218971  | conserved hypothetical protein                                    |
| XP_009690254.1 | 0.0367925  | 0.230846   | 0.159381     | 0.00790841  | 0.140262   | 0.0563832    | 0.107882  | conserved hypothetical protein                                    |
| XP_009690255.1 | 0.0324641  | 0.404017   | 0.0803532    | 0.0245978   | 0.451144   | 0.0545232    | 0.067438  | protein kinase                                                    |
| XP_009690256.1 | 0.0157263  | 0.378491   | 0.0415498    | 0.014919    | 0.625129   | 0.0238655    | 0.032708  | uncharacterized protein                                           |
| XP_009690257.1 | 0.0573118  | 0.44951    | 0.127499     | 0.0560822   | 0.590891   | 0.0949112    | 0.111205  | heat shock protein                                                |
| XP_009690258.1 | 0.00547826 | 1.17355    | 0.00466811   | 0.00437012  | 1.23877    | 0.0035278    | 0.004098  | heat shock protein 90                                             |
| XP_009690259.1 | 0.00271635 | 0.184724   | 0.0147049    |             |            |              | 0.0147049 | ADP-ribosylation factor                                           |
| XP_009690260.1 | 0.0781943  | 0.266594   | 0.293309     | 0.0659449   | 0.32134    | 0.205218     | 0.249263  | Conserved hypothetical protein                                    |
| XP_009690261.1 | 0.0326921  | 0.584816   | 0.0559015    | 0.0251286   | 0.564447   | 0.044519     | 0.05021   | conserved hypothetical protein                                    |
| XP_009690262.1 | 0.0229461  | 0.568583   | 0.0403566    | 0.0219944   | 0.656564   | 0.0334993    | 0.036928  | uncharacterized protein                                           |

| protein_id     | Chitose_ka  | Chitose_ks | Chitose_kaks | Buffeli_ka  | Buffeli_ks  | Buffeli_kaks | mean_kaks | function                                             |
|----------------|-------------|------------|--------------|-------------|-------------|--------------|-----------|------------------------------------------------------|
| XP_009690263.1 | 0.0688294   | 0.387176   | 0.177773     | 0.0690998   | 0.417281    | 0.165595     | 0.171684  | conserved hypothetical protein                       |
| XP_009690264.1 | 0.0954922   | 0.553223   | 0.172611     | 0.079547    | 0.506748    | 0.156975     | 0.164793  | conserved hypothetical protein                       |
| XP_009690265.1 | 0.0303467   | 0.797242   | 0.0380646    | 0.0327717   | 0.519921    | 0.0630321    | 0.050548  | uncharacterized protein                              |
| XP_009690266.1 | 0.000118861 | 0.118861   | 0.001        | 0.000169546 | 0.169546    | 0.001        | 0.001     | conserved hypothetical protein                       |
| XP_009690267.1 | 0.0310253   | 0.357998   | 0.0866634    | 0.0114743   | 0.43385     | 0.0264475    | 0.056555  | ATP synthase delta chain%2C mitochondrial            |
| XP_009690268.1 | 0.0408332   | 0.640177   | 0.0637842    | 0.0243283   | 0.447954    | 0.0543098    | 0.059047  | conserved hypothetical protein                       |
| XP_009690269.1 | 0.108717    | 0.485142   | 0.224094     | 0.12867     | 0.516264    | 0.249232     | 0.236663  | hypothetical protein                                 |
| XP_009690270.1 | NA          | NA         | NA           | 0.0481114   | 0.429317    | 0.112065     | NA        | hypothetical protein                                 |
| XP_009690272.1 | 0.0776059   | 0.977309   | 0.0794078    | 0.0610528   | 0.892544    | 0.0684031    | 0.073905  | uncharacterized protein                              |
| XP_009690273.1 | 0.0556458   | 0.46701    | 0.119153     | 0.0526081   | 0.384566    | 0.136799     | 0.127976  | ion transport protein                                |
| XP_009690274.1 | 0.0327165   | 0.581237   | 0.0562877    | 0.0357509   | 0.686855    | 0.0520501    | 0.054169  | falcilysin                                           |
| XP_009690275.1 | 0.0672524   | 0.852571   | 0.0788819    | 0.0706219   | 0.884501    | 0.0798438    | 0.079363  | uncharacterized protein                              |
| XP_009690276.1 | 0.00717187  | 0.877049   | 0.00817727   | 0.00480165  | 0.971456    | 0.00494273   | 0.00656   | conserved hypothetical protein                       |
| XP_009690277.1 | 0.0579469   | 0.638962   | 0.0906891    | 0.0678499   | 0.725071    | 0.093577     | 0.092133  | conserved hypothetical protein                       |
| XP_009690278.1 | 0.0507481   | 0.703708   | 0.0721153    | 0.0571157   | 0.586242    | 0.0974267    | 0.084771  | conserved hypothetical protein                       |
| XP_009690279.1 | 0.0943497   | 0.361745   | 0.260818     | 0.115715    | 0.29321     | 0.39465      | 0.327734  | conserved hypothetical protein                       |
| XP_009690280.1 | 0.0508515   | 0.486164   | 0.104597     | 0.0283428   | 0.419495    | 0.0675641    | 0.086081  | anthranilate synthase component II                   |
| XP_009690281.1 | 0.0518836   | 0.834947   | 0.06214      | 0.0433612   | 0.66685     | 0.0650239    | 0.063582  | uncharacterized protein                              |
| XP_009690282.1 | 0.101863    | 0.625015   | 0.162977     | 0.0583538   | 0.470278    | 0.124084     | 0.143531  | 50S ribosomal protein L9                             |
| XP_009690283.1 | 0.0829219   | 0.351649   | 0.235808     | 0.0526841   | 0.413918    | 0.127282     | 0.181545  | conserved hypothetical protein                       |
| XP_009690284.1 | 0.0395064   | 0.519405   | 0.0760608    | 0.0260118   | 0.447355    | 0.0581457    | 0.067103  | uncharacterized protein                              |
| XP_009690285.1 | 0.0510363   | 1.0219     | 0.0499425    | 0.0564914   | 0.900728    | 0.0627174    | 0.05633   | conserved hypothetical protein                       |
| XP_009690286.1 | 0.108504    | 0.349302   | 0.310631     | 0.121661    | 0.446431    | 0.272519     | 0.291575  | conserved hypothetical protein                       |
| XP_009690287.1 | 0.0569301   | 0.529945   | 0.107426     | 0.0435612   | 0.463551    | 0.0939729    | 0.100699  | uncharacterized protein                              |
| XP_009690288.1 | 0.0627419   | 0.213828   | 0.293422     | 0.0583318   | 0.291216    | 0.200304     | 0.246863  | uncharacterized protein                              |
| XP_009690289.1 | 0.0254529   | 0.327739   | 0.0776619    | 0.0258052   | 0.388542    | 0.0664155    | 0.072039  | hypothetical protein                                 |
| XP_009690290.1 | NA          | NA         | NA           | NA          | NA          | NA           | NA        | ribosomal protein L39                                |
| XP_009690292.1 | 0.13465     | 0.482012   | 0.27935      | 0.118829    | 0.58974     | 0.201494     | 0.240422  | conserved hypothetical protein                       |
| XP_009690293.1 |             |            |              | 0.013389    | 0.000267781 | 50           | 50        | hypothetical protein                                 |
| XP_009690295.1 | 0.00645373  | 0.38586    | 0.0167256    | 0.0127674   | 0.348622    | 0.0366226    | 0.026674  | RNA binding motif protein 42                         |
| XP_009690296.1 | 0.0286193   | 0.113211   | 0.252796     | NA          | NA          | NA           | NA        | conserved hypothetical protein                       |
| XP_009690297.1 | 0.119445    | 0.581407   | 0.205441     | 0.116949    | 0.539015    | 0.216968     | 0.211205  | conserved hypothetical protein                       |
| XP_009690298.1 | 0.0554263   | 0.846587   | 0.0654703    | 0.0441503   | 0.8029      | 0.0549886    | 0.060229  | uncharacterized protein                              |
| XP_009690299.1 | 0.0752565   | 0.729042   | 0.103227     | 0.0675832   | 0.542758    | 0.124518     | 0.113873  | RNA helicase                                         |
| XP_009690300.1 | 0.0395127   | 0.517746   | 0.0763169    | 0.0386955   | 0.547181    | 0.0707179    | 0.073517  | uncharacterized protein                              |
| XP_009690301.1 | 0.0186932   | 0.360913   | 0.0517942    | 0.00825672  | 0.352398    | 0.0234301    | 0.037612  | ubiquitin carrier protein                            |
| XP_009690302.1 | 0.0175319   | 0.511704   | 0.0342617    | 0.0147459   | 0.626373    | 0.0235416    | 0.028902  | T-complex protein 1 epsilon subunit                  |
| XP_009690303.1 | 0.0176278   | 0.522211   | 0.0337561    |             |             |              | 0.0337561 | vesicle trafficking protein-like 1                   |
| XP_009690304.1 | 0.00434026  | 0.193475   | 0.0224332    |             |             |              | 0.0224332 | conserved hypothetical protein                       |
| XP_009690305.1 | 0.0357358   | 0.52401    | 0.0681969    | 0.0319919   | 0.447103    | 0.0715537    | 0.069875  | ATP-dependent helicase                               |
| XP_009690306.1 | 0.0636392   | 0.800124   | 0.0795367    | 0.0600804   | 0.596123    | 0.100785     | 0.090161  | major facilitator superfamily MFS-1 protein          |
| XP_009690307.1 | 0.0515965   | 0.506339   | 0.101901     | 0.0478574   | 0.394833    | 0.121209     | 0.111555  | conserved hypothetical protein                       |
| XP_009690308.1 | 0.0362727   | 0.518089   | 0.0700125    | 0.0487561   | 0.592669    | 0.0822653    | 0.076139  | conserved hypothetical protein                       |
| XP_009690309.1 | 0.0182441   | 0.529591   | 0.0344495    | 0.0121737   | 0.722942    | 0.0168391    | 0.025644  | uncharacterized protein                              |
| XP_009690310.1 | 0.0041428   | 0.201305   | 0.0205797    | 0.000120648 | 0.120648    | 0.001        | 0.01079   | 40S ribosomal protein S11                            |
| XP_009690311.1 | 0.0645641   | 0.340487   | 0.189623     | 0.0481034   | 0.36747     | 0.130904     | 0.160264  | conserved hypothetical protein                       |
| XP_009690312.1 | 0.0250329   | 0.395861   | 0.0632367    | 0.0458267   | 0.37064     | 0.123642     | 0.093439  | proteasome regulatory protein                        |
| XP_009690313.1 | 0.219758    | 0.00651658 | 33.7229      |             |             |              | 33.7229   | hypothetical protein                                 |
| XP_009690314.1 | 0.0448826   | 0.702356   | 0.0639029    | 0.0483269   | 0.508215    | 0.0950915    | 0.079497  | conserved hypothetical protein                       |
| XP_009690316.1 | 0.0345576   | 0.379263   | 0.0911178    | 0.0470029   | 0.477716    | 0.0983909    | 0.094754  | Cg8 protein                                          |
| XP_009690317.1 | 0.0527978   | 0.624403   | 0.0845573    | 0.0485072   | 0.766211    | 0.0633079    | 0.073933  | conserved hypothetical protein                       |
| XP_009690318.1 | 0.0604981   | 0.545051   | 0.110995     | 0.055749    | 0.673709    | 0.0827494    | 0.096872  | eukaryotic translation initiation factor 3 subunit 2 |
| XP_009690319.1 | 0.0240677   | 0.816467   | 0.0294778    | 0.0179901   | 0.988526    | 0.0181989    | 0.023838  | beta adaptin                                         |

| protein_id     | Chitose_ka  | Chitose_ks | Chitose_kaks | Buffeli_ka  | Buffeli_ks | Buffeli_kaks | mean_kaks | function                                                              |
|----------------|-------------|------------|--------------|-------------|------------|--------------|-----------|-----------------------------------------------------------------------|
| XP_009690320.1 | 0.000411431 | 0.411431   | 0.001        |             |            |              | 0.001     | 60S ribosomal protein L30                                             |
| XP_009690321.1 | 0.172058    | 0.510339   | 0.337144     | 0.150165    | 0.475378   | 0.315885     | 0.326515  | conserved hypothetical protein                                        |
| XP_009690322.1 | 0.0219957   | 0.722615   | 0.030439     | 0.0154916   | 0.606669   | 0.0255355    | 0.027987  | eukaryotic translation initiation factor 3                            |
| XP_009690323.1 | 0.0138338   | 0.197412   | 0.070076     |             |            |              | 0.070076  | conserved hypothetical protein                                        |
| XP_009690324.1 | 0.0236646   | 0.606083   | 0.0390452    | 0.0148931   | 0.807041   | 0.018454     | 0.02875   | isoleucyl-tRNA synthetase                                             |
| XP_009690325.1 | 0.0688323   | 0.36926    | 0.186406     | 0.0752032   | 0.400597   | 0.187728     | 0.187067  | chaperonin                                                            |
| XP_009690326.1 | 0.0476196   | 0.606863   | 0.0784685    | 0.0388799   | 0.528154   | 0.0736147    | 0.076042  | topoisomerase-related nucleotidyltransferase                          |
| XP_009690327.1 | 0.0383404   | 0.648688   | 0.0591045    | 0.0370203   | 0.677571   | 0.0546367    | 0.056871  | endoplasmic reticulum transport protein                               |
| XP_009690328.1 | 0.051868    | 0.695144   | 0.0746148    | 0.0530445   | 0.712206   | 0.0744792    | 0.074547  | conserved hypothetical protein                                        |
| XP_009690329.1 | 0.0508903   | 0.421887   | 0.120625     | 0.0354233   | 0.298795   | 0.118554     | 0.11959   | conserved hypothetical protein                                        |
| XP_009690330.1 | 0.0907174   | 0.412171   | 0.220096     | 0.0442531   | 0.489726   | 0.0903629    | 0.155229  | uncharacterized protein                                               |
| XP_009690331.1 | 0.0813392   | 0.455337   | 0.178635     | 0.0682795   | 0.41993    | 0.162597     | 0.170616  | helicase                                                              |
| XP_009690332.1 | 0.017587    | 0.378924   | 0.0464132    | 0.00934934  | 0.232272   | 0.0402518    | 0.043332  | 60S ribosomal protein L27a                                            |
| XP_009690334.1 | 0.00422824  | 0.012226   | 0.345839     | 0.0217028   | 0.512903   | 0.0423136    | 0.194076  | thymidylate kinase                                                    |
| XP_009690335.1 | 0.0659274   | 0.450728   | 0.146269     | 0.078284    | 0.446457   | 0.175345     | 0.160807  | cyclin-dependent protein kinase PHO85 homologue                       |
| XP_009690336.1 | 0.152465    | 0.723913   | 0.210612     | 0.0965673   | 0.672256   | 0.143647     | 0.177129  | conserved hypothetical protein                                        |
| XP_009690337.1 | 0.0308292   | 0.515221   | 0.0598368    | 0.0329341   | 0.480183   | 0.0685867    | 0.064212  | glutaminyl-tRNA synthetase                                            |
| XP_009690338.1 | 0.00025384  | 0.25384    | 0.001        | 0.000283928 | 0.283928   | 0.001        | 0.001     | ribosomal protein L23                                                 |
| XP_009690339.1 | 0.0112741   | 0.346966   | 0.0324934    | 0.00904616  | 0.426535   | 0.0212085    | 0.026851  | syntaxin 5                                                            |
| XP_009690340.1 | 0.00978273  | 0.0961122  | 0.101784     |             |            |              | 0.101784  | predicted protein                                                     |
| XP_009690341.1 | 0.0498841   | 0.464969   | 0.107285     | 0.0472672   | 0.448477   | 0.105395     | 0.10634   | uncharacterized protein                                               |
| XP_009690342.1 | 0.142442    | 0.464078   | 0.306935     | 0.191321    | 0.545099   | 0.350985     | 0.32896   | conserved hypothetical protein                                        |
| XP_009690343.1 | 0.121504    | 0.349233   | 0.347917     | 0.142789    | 0.421382   | 0.338858     | 0.343387  | conserved hypothetical protein                                        |
| XP_009690344.1 |             |            |              | 0.112518    | 0.412602   | 0.272704     | 0.272704  | conserved hypothetical protein                                        |
| XP_009690345.1 | 0.0517584   | 0.544897   | 0.0949874    | 0.0469918   | 0.505338   | 0.0929908    | 0.093989  | Bromodomain-containing protein 1                                      |
| XP_009690346.1 | 0.0444573   | 0.537712   | 0.0826786    | 0.0402538   | 0.546844   | 0.0736111    | 0.078145  | uncharacterized protein                                               |
| XP_009690347.1 | 0.0225458   | 0.686921   | 0.0328216    | 0.0324058   | 1.08798    | 0.0297852    | 0.031303  | cargo protein                                                         |
| XP_009690348.1 | 0.113877    | 0.476477   | 0.238998     | 0.094381    | 0.427307   | 0.220874     | 0.229936  | uncharacterized protein                                               |
| XP_009690349.1 | 0.0693236   | 0.474259   | 0.146172     | 0.0556924   | 0.399719   | 0.139329     | 0.142751  | ATP-dependent RNA helicase                                            |
| XP_009690350.1 | 0.00198998  | 0.246198   | 0.00808282   | 0.00032908  | 0.32908    | 0.001        | 0.004541  | predicted protein                                                     |
| XP_009690351.1 | 0.0490807   | 0.390754   | 0.125605     | 0.0388207   | 0.382028   | 0.101617     | 0.113611  | apurinic/apyrimidinic endonuclease                                    |
| XP_009690352.1 | 0.0513779   | 0.540646   | 0.0950305    | 0.0526381   | 0.576687   | 0.0912766    | 0.093154  | conserved hypothetical protein                                        |
| XP_009690353.1 | 0.133369    | 0.427133   | 0.312243     |             |            |              | 0.312243  | conserved hypothetical protein                                        |
| XP_009690354.1 | 0.0871867   | 0.418183   | 0.208489     |             |            |              | 0.208489  | conserved hypothetical protein                                        |
| XP_009690357.1 | 0.131329    | 0.744095   | 0.176496     | 0.170507    | 0.499852   | 0.341115     | 0.258806  | uncharacterized protein                                               |
| XP_009690358.1 | 0.0358378   | 0.280032   | 0.127977     | 0.0113647   | 0.130632   | 0.0869979    | 0.107487  | uncharacterized protein                                               |
| XP_009690359.1 | 0.0786011   | 0.353089   | 0.22261      | 0.0616008   | 0.330886   | 0.186169     | 0.20439   | conserved hypothetical protein                                        |
| XP_009690360.1 | 0.0804871   | 0.600901   | 0.133944     | 0.104021    | 0.770247   | 0.135048     | 0.134496  | uncharacterized protein                                               |
| XP_009690362.1 | 0.0759544   | 0.309154   | 0.245685     |             |            |              | 0.245685  | uncharacterized protein                                               |
| XP_009690364.1 | 0.113765    | 0.539251   | 0.210968     | 0.111031    | 0.429556   | 0.258478     | 0.234723  | uncharacterized protein                                               |
| XP_009690366.1 | 0.0197771   | 0.157235   | 0.12578      |             |            |              | 0.12578   | conserved hypothetical protein                                        |
| XP_009690367.1 | 0.0436591   | 0.373172   | 0.116994     |             |            |              | 0.116994  | uncharacterized protein                                               |
| XP_009690368.1 | 0.0324235   | 0.636344   | 0.0509527    | 0.0353162   | 0.687859   | 0.0513422    | 0.051147  | adhesion regulation modulator protein                                 |
| XP_009690369.1 | 0.098874    | 0.467459   | 0.211514     | 0.0879396   | 0.50045    | 0.175721     | 0.193617  | uncharacterized protein                                               |
| XP_009690370.1 | 0.0315032   | 0.547346   | 0.0575562    | 0.0477457   | 0.219405   | 0.217614     | 0.137585  | conserved hypothetical protein                                        |
| XP_009690371.1 | NA          | NA         | NA           |             |            |              | NA        | uncharacterized protein                                               |
| XP_009690372.1 | 0.0759213   | 0.338685   | 0.224165     | 0.081077    | 0.317969   | 0.254984     | 0.239574  | uncharacterized protein                                               |
| XP_009690373.1 | 0.0665971   | 0.561068   | 0.118697     | 0.0584012   | 0.408333   | 0.143023     | 0.13086   | ribosomal protein S9/S16                                              |
| XP_009690374.1 | 0.0764271   | 0.458483   | 0.166696     | 0.102968    | 0.408339   | 0.252162     | 0.209429  | conserved hypothetical protein                                        |
| XP_009690375.1 | 0.0447147   | 0.704857   | 0.0634379    | 0.054379    | 0.76726    | 0.0708743    | 0.067156  | uncharacterized protein                                               |
| XP_009690376.1 | 0.0205125   | 0.170377   | 0.120395     | 0.0233675   | 0.224202   | 0.104225     | 0.11231   | serine/threonine protein phosphatase 1%2C PP1-gamma catalytic subunit |
| XP_009690377.1 | 0.0632622   | 1.03548    | 0.0610945    | 0.0770785   | 1.17853    | 0.0654021    | 0.063248  | uncharacterized protein                                               |
| XP_009690378.1 | 0.0170675   | 0.499235   | 0.0341873    | 0.0210655   | 0.364593   | 0.0577782    | 0.045983  | mRNA capping enzyme                                                   |

| protein_id     | Chitose_ka  | Chitose_ks | Chitose_kaks | Buffeli_ka  | Buffeli_ks | Buffeli_kaks | mean_kaks | function                                                  |
|----------------|-------------|------------|--------------|-------------|------------|--------------|-----------|-----------------------------------------------------------|
| XP_009690379.1 | 0.032167    | 0.3173     | 0.101377     | 0.0283373   | 0.339522   | 0.0834623    | 0.09242   | uncharacterized protein                                   |
| XP_009690380.1 | 0.15062     | 0.783122   | 0.192333     |             |            |              | 0.192333  | uncharacterized protein                                   |
| XP_009690381.1 | 0.144479    | 0.646243   | 0.223567     | 0.17904     | 0.710997   | 0.251816     | 0.237692  | uncharacterized protein                                   |
| XP_009690382.1 | 0.0335939   | 0.421061   | 0.0797838    | 0.0437479   | 0.513815   | 0.0851434    | 0.082464  | hydrolase                                                 |
| XP_009690383.1 | 0.0141664   | 0.416522   | 0.0340112    | 0.00532301  | 0.2641     | 0.0201553    | 0.027083  | eukaryotic peptide chain release factor                   |
| XP_009690384.1 | 3.57164E-05 | 0.0357164  | 0.001        |             |            |              | 0.001     | molecular chaperone protein                               |
| XP_009690385.1 | 0.0539726   | 0.308646   | 0.174869     |             |            |              | 0.174869  | conserved hypothetical protein                            |
| XP_009690386.1 | 0.0164183   | 0.29409    | 0.0558275    |             |            |              | 0.0558275 | uncharacterized protein                                   |
| XP_009690387.1 | 0.00687861  | 0.531748   | 0.0129359    | 0.00403704  | 0.541555   | 0.00745454   | 0.010195  | RNA polymerase subunit RPB4-like protein                  |
| XP_009690388.1 | 0.118838    | 0.448656   | 0.264876     | 0.121905    | 0.390497   | 0.312179     | 0.288527  | conserved hypothetical protein                            |
| XP_009690389.1 | 0.0341173   | 0.715028   | 0.0477146    | 0.0389992   | 0.790174   | 0.0493552    | 0.048535  | uncharacterized protein                                   |
| XP_009690391.1 |             |            |              | 0.0999528   | 0.440786   | 0.22676      | 0.22676   | conserved hypothetical protein                            |
| XP_009690392.1 |             |            |              | 0.000365568 | 0.365568   | 0.001        | 0.001     | small nuclear ribonucleoprotein associated protein b      |
| XP_009690393.1 | 0.0584685   | 0.2401     | 0.243517     | 0.123705    | 0.429755   | 0.28785      | 0.265684  | conserved hypothetical protein                            |
| XP_009690394.1 | 0.0288151   | 0.408903   | 0.0704693    | 0.0241041   | 0.419638   | 0.0574402    | 0.063955  | Diphthamide synthesis protein                             |
| XP_009690395.1 | 0.16175     | 0.374964   | 0.431373     | 0.167496    | 0.319763   | 0.523815     | 0.477594  | uncharacterized protein                                   |
| XP_009690396.1 | 0.0774823   | 0.533457   | 0.145246     | 0.0912311   | 0.503386   | 0.181235     | 0.163241  | uncharacterized protein                                   |
| XP_009690397.1 | 0.062037    | 0.403697   | 0.153672     | 0.0506985   | 0.374237   | 0.135472     | 0.144572  | splicing factor                                           |
| XP_009690398.1 | 0.106896    | 0.6422     | 0.166453     | 0.10675     | 0.680022   | 0.156981     | 0.161717  | conserved hypothetical protein                            |
| XP_009690399.1 | 0.0288901   | 0.338335   | 0.0853889    | 0.0404785   | 0.375817   | 0.107708     | 0.096548  | 50S ribosomal protein L9                                  |
| XP_009690400.1 | 0.0540503   | 0.543652   | 0.0994207    | 0.0534904   | 0.472628   | 0.113176     | 0.106298  | Mg protoporphyrin IX chelatase                            |
| XP_009690401.1 | 0.0712667   | 0.611615   | 0.116522     | 0.058528    | 0.536048   | 0.109184     | 0.112853  | dual-specificity phosphatase                              |
| XP_009690402.1 | 0.064999    | 0.442923   | 0.14675      | 0.0455929   | 0.390756   | 0.116679     | 0.131715  | uncharacterized protein                                   |
| XP_009690403.1 | 0.0090224   | 0.533754   | 0.0169037    | 0.0107305   | 0.432238   | 0.0248254    | 0.020865  | 60S acidic ribosomal protein P2                           |
| XP_009690404.1 | 0.0357773   | 0.456995   | 0.0782882    |             |            |              | 0.0782882 | uncharacterized protein                                   |
| XP_009690405.1 | 0.0298489   | 0.565076   | 0.0528227    | 0.0186272   | 0.573926   | 0.0324557    | 0.042639  | cleavage and polyadenylation specificity factor subunit 4 |
| XP_009690406.1 | 0.0593835   | 0.551446   | 0.107687     | 0.0209856   | 0.190252   | 0.110304     | 0.108995  | uracil-DNA glycosylase                                    |
| XP_009690407.1 | 0.00370208  | 0.367882   | 0.0100632    | 0.00940499  | 0.275817   | 0.0340986    | 0.022081  | splicing factor 3b subunit 4                              |
| XP_009690408.1 | 0.0388749   | 0.503675   | 0.0771825    | 0.0441476   | 0.684217   | 0.0645229    | 0.070853  | conserved hypothetical protein                            |
| XP_009690409.1 | 0.0504345   | 0.491909   | 0.102528     | 0.042223    | 0.412032   | 0.102475     | 0.102501  | eukaryotic translation initiation factor 3%2C subunit 6   |
| XP_009690410.1 | 0.0258944   | 0.43128    | 0.0600408    | 0.0273532   | 0.407318   | 0.0671544    | 0.063598  | U1/2 small nuclear ribonucleoprotein                      |
| XP_009690411.1 | 0.0275207   | 0.44072    | 0.0624448    | 0.0189814   | 0.435756   | 0.0435596    | 0.053002  | CAMP-dependent protein kinase catalytic subunit           |
| XP_009690412.1 | 0.0901718   | 0.729769   | 0.123562     | 0.0790455   | 0.629379   | 0.125593     | 0.124578  | uncharacterized protein                                   |
| XP_009690413.1 | 0.0361358   | 0.442367   | 0.0816875    | 0.0303475   | 0.555839   | 0.0545977    | 0.068143  | uncharacterized protein                                   |
| XP_009690414.1 | 0.0423448   | 0.394222   | 0.107414     | 0.0111053   | 0.117835   | 0.0942441    | 0.100829  | conserved hypothetical protein                            |
| XP_009690415.1 | 0.0427122   | 0.485167   | 0.088036     | 0.0561227   | 0.428937   | 0.130841     | 0.109439  | uncharacterized protein                                   |
| XP_009690416.1 | 0.104285    | 0.6783     | 0.153744     | 0.0980819   | 0.692002   | 0.141736     | 0.14774   | uncharacterized protein                                   |
| XP_009690417.1 | 0.182418    | 0.871974   | 0.209201     | 0.205922    | 0.759411   | 0.27116      | 0.240181  | hypothetical protein                                      |
| XP_009690418.1 | 0.078253    | 0.636856   | 0.122874     | 0.0666765   | 0.610184   | 0.109273     | 0.116073  | uncharacterized protein                                   |
| XP_009690419.1 | 0.0937327   | 0.49894    | 0.187864     | 0.103508    | 0.505769   | 0.204654     | 0.196259  | conserved hypothetical protein                            |
| XP_009690420.1 | 0.0366121   | 0.490517   | 0.07464      | 0.0329026   | 0.555918   | 0.0591861    | 0.066913  | ABC transporter                                           |
| XP_009690421.1 | 0.0398461   | 0.581521   | 0.0685205    | 0.0305264   | 0.529161   | 0.0576883    | 0.063104  | splicing factor 3 subunit 1                               |
| XP_009690422.1 | 0.0743626   | 0.449151   | 0.165562     | 0.073803    | 0.40015    | 0.184438     | 0.175     | ABC transporter                                           |
| XP_009690423.1 | 0.0438037   | 0.568058   | 0.0771114    | 0.0488085   | 0.565235   | 0.0863507    | 0.081731  | uncharacterized protein                                   |
| XP_009690424.1 | 0.0289865   | 0.270716   | 0.107074     | 0.0464271   | 0.313072   | 0.148296     | 0.127685  | ribosomal protein L20                                     |
| XP_009690425.1 | 0.0343854   | 0.320647   | 0.107237     | 0.0334362   | 0.512616   | 0.0652266    | 0.086232  | translocation protein                                     |
| XP_009690426.1 | 0.0712507   | 0.901765   | 0.0790125    | 0.0736577   | 0.566389   | 0.130048     | 0.10453   | uncharacterized protein                                   |
| XP_009690427.1 | 0.047935    | 0.49616    | 0.096612     | 0.0510688   | 0.600616   | 0.0850274    | 0.09082   | uncharacterized protein                                   |
| XP_009690428.1 | 0.0212774   | 0.218375   | 0.0974352    | 0.0196143   | 0.180443   | 0.108701     | 0.103068  | cytochrome c                                              |
| XP_009690429.1 | 0.0760966   | 0.353977   | 0.214976     | 0.0742716   | 0.426331   | 0.174211     | 0.194594  | conserved hypothetical protein                            |
| XP_009690430.1 | 0.121345    | 0.590879   | 0.205364     | 0.0607193   | 0.603809   | 0.10056      | 0.152962  | uncharacterized protein                                   |
| XP_009690431.1 | 0.051986    | 0.763673   | 0.0680736    | 0.047656    | 0.63815    | 0.0746784    | 0.071376  | calcium-dependent protein kinase                          |
| XP_009690432.1 | 0.0673273   | 0.451771   | 0.14903      |             |            |              | 0.14903   | conserved hypothetical protein                            |

| protein_id     | Chitose_ka | Chitose_ks | Chitose_kaks | Buffeli_ka | Buffeli_ks | Buffeli_kaks | mean_kaks | function                                                   |
|----------------|------------|------------|--------------|------------|------------|--------------|-----------|------------------------------------------------------------|
| XP_009690433.1 | 0.0647896  | 0.575834   | 0.112514     | 0.0537439  | 0.600702   | 0.0894686    | 0.100991  | uncharacterized protein                                    |
| XP_009690434.1 | 0.049241   | 0.680629   | 0.0723463    | 0.0469771  | 0.642724   | 0.0730907    | 0.072718  | conserved hypothetical protein                             |
| XP_009690435.1 | 0.0980584  | 0.714085   | 0.13732      |            |            |              | 0.13732   | hypothetical protein                                       |
| XP_009690436.1 | 0.153083   | 0.666757   | 0.229593     | 0.130353   | 0.651271   | 0.200152     | 0.214872  | uncharacterized protein                                    |
| XP_009690437.1 | 0.0476904  | 0.475675   | 0.100258     | 0.0322643  | 0.308408   | 0.104616     | 0.102437  | uncharacterized protein                                    |
| XP_009690438.1 | 0.057054   | 0.604806   | 0.0943344    | 0.0461874  | 0.551713   | 0.0837162    | 0.089025  | uncharacterized protein                                    |
| XP_009690439.1 | 0.0778329  | 0.74363    | 0.104666     | 0.0702083  | 0.755122   | 0.0929762    | 0.098821  | uncharacterized protein                                    |
| XP_009690440.1 | 0.0882577  | 0.870159   | 0.101427     | 0.0549569  | 0.564917   | 0.0972832    | 0.099355  | uncharacterized protein                                    |
| XP_009690441.1 | 0.0518493  | 0.630918   | 0.0821807    | 0.0428991  | 0.887431   | 0.0483408    | 0.065261  | uncharacterized protein                                    |
| XP_009690442.1 | 0.0663364  | 0.726173   | 0.0913506    | 0.0598565  | 0.76879    | 0.0778581    | 0.084604  | conserved hypothetical protein                             |
| XP_009690443.1 | 0.0258134  | 0.811981   | 0.0317906    | 0.0203379  | 0.669909   | 0.0303591    | 0.031075  | uncharacterized protein                                    |
| XP_009690444.1 | 0.0322186  | 0.721177   | 0.0446751    | 0.0230353  | 0.662844   | 0.0347522    | 0.039714  | uncharacterized protein                                    |
| XP_009690445.1 | 0.0645729  | 0.969633   | 0.0665952    | 0.0674292  | 1.01117    | 0.0666846    | 0.06664   | uncharacterized protein                                    |
| XP_009690446.1 | 0.108404   | 0.624541   | 0.173575     | 0.104881   | 0.725258   | 0.144612     | 0.159093  | conserved hypothetical protein                             |
| XP_009690447.1 | 0.00783577 | 0.895584   | 0.00874934   | 0.0124542  | 0.744752   | 0.0167226    | 0.012736  | clathrin-coat assembly protein                             |
| XP_009690448.1 | 0.125737   | 0.507558   | 0.247729     | 0.0759198  | 0.172518   | 0.440068     | 0.343898  | conserved hypothetical protein                             |
| XP_009690449.1 | 0.0806781  | 0.900643   | 0.0895783    | 0.0734141  | 1.02456    | 0.0716543    | 0.080616  | uncharacterized protein                                    |
| XP_009690450.1 | 0.126921   | 0.954977   | 0.132904     | 0.121524   | 1.21986    | 0.099621     | 0.116262  | conserved hypothetical protein                             |
| XP_009690451.1 | 0.108777   | 0.459507   | 0.236726     | 0.120355   | 0.434989   | 0.276686     | 0.256706  | uncharacterized protein                                    |
| XP_009690452.1 | 0.0205602  | 0.996967   | 0.0206228    | 0.0188512  | 0.774715   | 0.0243331    | 0.022478  | nucleoside diphosphate kinase                              |
| XP_009690453.1 | 0.0387653  | 0.66056    | 0.0586854    | 0.0310035  | 0.624524   | 0.0496434    | 0.054164  | signal recognition particle receptor subunit alpha         |
| XP_009690454.1 | 0.0451102  | 0.705505   | 0.0639403    | 0.0470988  | 0.882212   | 0.0533871    | 0.058664  | conserved hypothetical protein                             |
| XP_009690455.1 | 0.035225   | 0.746017   | 0.0472174    | 0.0515735  | 0.989583   | 0.0521164    | 0.049667  | conserved hypothetical protein                             |
| XP_009690456.1 | 0.0672995  | 0.549993   | 0.122364     | 0.0618066  | 0.50546    | 0.122278     | 0.122321  | conserved hypothetical protein                             |
| XP_009690457.1 | 0.0427899  | 0.676733   | 0.0632301    | 0.022499   | 1.09347    | 0.0205758    | 0.041903  | uncharacterized protein                                    |
| XP_009690458.1 | 0.0100632  | 0.458228   | 0.0219611    | 0.0133131  | 0.590163   | 0.0225584    | 0.02226   | mitochondrial respiratory chain complexes assembly protein |
| XP_009690459.1 | 0.0473344  | 0.531188   | 0.0891105    | 0.0371219  | 0.603865   | 0.0614739    | 0.075292  | ATP-dependent RNA helicase                                 |
| XP_009690460.1 | 0.0801016  | 0.643588   | 0.124461     | 0.0946121  | 0.515876   | 0.183401     | 0.153931  | conserved hypothetical protein                             |
| XP_009690461.1 | 0.0301824  | 0.381922   | 0.0790278    | 0.030529   | 0.488103   | 0.0625462    | 0.070787  | uncharacterized protein                                    |
| XP_009690462.1 | 0.0107872  | 0.441225   | 0.0244482    | 0.0107498  | 0.457486   | 0.0234976    | 0.023973  | uncharacterized protein                                    |
| XP_009690463.1 | 0.0785733  | 0.363008   | 0.21645      | 0.110246   | 0.462245   | 0.238501     | 0.227475  | uncharacterized protein                                    |
| XP_009690464.1 | 0.0402155  | 0.856342   | 0.046962     | 0.0373029  | 0.705884   | 0.0528456    | 0.049904  | predicted protein                                          |
| XP_009690465.1 | 0.0608944  | 0.543986   | 0.111941     | 0.0942152  | 0.563843   | 0.167095     | 0.139518  | purine nucleoside phosphorylase                            |
| XP_009690466.1 | 0.0756892  | 0.549923   | 0.137636     | 0.0820201  | 0.513873   | 0.159612     | 0.148624  | purine nucleoside phosphorylase                            |
| XP_009690467.1 | 0.0496644  | 0.464579   | 0.106902     | 0.061226   | 0.345046   | 0.177443     | 0.142172  | uncharacterized protein                                    |
| XP_009690468.1 | 0.0256994  | 0.531821   | 0.0483235    | 0.0268981  | 0.347249   | 0.0774605    | 0.062892  | uncharacterized protein                                    |
| XP_009690469.1 | 0.01968    | 0.289392   | 0.0680046    | 0.0431182  | 0.16622    | 0.259405     | 0.163705  | uncharacterized protein                                    |
| XP_009690470.1 | 0.00704175 | 0.319818   | 0.022018     |            |            |              | 0.022018  | vacuolar ATP synthase subunit F                            |
| XP_009690471.1 | 0.0285049  | 0.569149   | 0.0500835    | 0.0194994  | 0.730511   | 0.0266929    | 0.038388  | uncharacterized protein                                    |
| XP_009690472.1 | 0.0558797  | 0.318376   | 0.175514     | 0.0442351  | 0.33707    | 0.131234     | 0.153374  | conserved hypothetical protein                             |
| XP_009690473.1 | 0.0479386  | 0.46569    | 0.102941     | 0.0487928  | 0.472543   | 0.103256     | 0.103099  | conserved hypothetical protein                             |
| XP_009690476.1 | 0.0203753  | 0.4014     | 0.0507607    | 0.0175537  | 0.265921   | 0.0660111    | 0.058386  | uncharacterized protein                                    |
| XP_009690477.1 | 0.0716945  | 0.564617   | 0.126979     | 0.0740921  | 0.533552   | 0.138866     | 0.132922  | conserved hypothetical protein                             |
| XP_009690480.1 | 0.0243726  | 0.585788   | 0.0416064    | 0.0258811  | 0.702788   | 0.0368264    | 0.039216  | oxoglutarate/malate translocator protein                   |
| XP_009690481.1 | 0.041452   | 0.678323   | 0.0611095    | 0.0391828  | 0.638307   | 0.0613856    | 0.061248  | uncharacterized protein                                    |
| XP_009690482.1 | 0.0475984  | 0.398061   | 0.119576     | 0.0393729  | 0.358566   | 0.109807     | 0.114692  | conserved hypothetical protein                             |
| XP_009690483.1 | 0.0428442  | 0.4801     | 0.0892401    | 0.0423905  | 0.566178   | 0.0748714    | 0.082056  | conserved hypothetical protein                             |
| XP_009690484.1 | 0.0224809  | 0.304182   | 0.0739061    | 0.0167715  | 0.314527   | 0.053323     | 0.063615  | uncharacterized protein                                    |
| XP_009690485.1 | 0.0339608  | 0.629762   | 0.0539264    | 0.035624   | 0.451996   | 0.078815     | 0.066371  | ABC transporter                                            |
| XP_009690486.1 | 0.148609   | 0.118204   | 1.25723      | 0.0966025  | 0.115384   | 0.837227     | 1.047229  | hypothetical protein                                       |
| XP_009690487.1 | 0.0396677  | 0.410231   | 0.0966961    | 0.0419379  | 0.565348   | 0.0741806    | 0.085438  | uncharacterized protein                                    |
| XP_009690488.1 | 0.0397044  | 0.520113   | 0.076338     | 0.0392983  | 0.466273   | 0.0842818    | 0.08031   | uncharacterized protein                                    |
| XP_009690489.1 | 0.00405715 | 0.434466   | 0.00933824   | 0.00136401 | 0.44045    | 0.00309685   | 0.006218  | cell differentiation protein                               |

| protein_id     | Chitose_ka  | Chitose_ks | Chitose_kaks | Buffeli_ka | Buffeli_ks | Buffeli_kaks | mean_kaks | function                                         |
|----------------|-------------|------------|--------------|------------|------------|--------------|-----------|--------------------------------------------------|
| XP_009690490.1 | 0.1672      | 0.223365   | 0.748549     | 0.156049   | 0.268647   | 0.580869     | 0.664709  | hypothetical protein                             |
| XP_009690491.1 | 0.226892    | 0.0629716  | 3.60308      | 0.198324   | 0.059203   | 3.34989      | 3.476485  | hypothetical protein                             |
| XP_009690492.1 | 0.00495292  | 0.604492   | 0.00819352   | 0.00484238 | 0.665799   | 0.00727303   | 0.007733  | tubulin subunit beta                             |
| XP_009690493.1 | 0.0565165   | 0.442866   | 0.127615     | 0.0511513  | 0.419226   | 0.122014     | 0.124814  | uncharacterized protein                          |
| XP_009690494.1 | 0.0381414   | 0.756898   | 0.0503917    | 0.0382724  | 0.710218   | 0.0538883    | 0.05214   | DNA topoisomerase 2                              |
| XP_009690495.1 | 0.0788951   | 0.379831   | 0.207711     | 0.0631872  | 0.339023   | 0.186381     | 0.197046  | conserved hypothetical protein                   |
| XP_009690497.1 | 0.0307521   | 0.369455   | 0.0832366    | 0.0217102  | 0.408131   | 0.0531942    | 0.068215  | DNA polymerase delta small subunit               |
| XP_009690498.1 | 0.0599154   | 0.628343   | 0.0953545    | 0.0534888  | 0.555109   | 0.0963573    | 0.095856  | conserved hypothetical protein                   |
| XP_009690499.1 | 0.0559888   | 0.503387   | 0.111224     | 0.0649949  | 0.455281   | 0.142758     | 0.126991  | uncharacterized protein                          |
| XP_009690500.1 | 0.0548067   | 0.324323   | 0.168988     | 0.0546539  | 0.255546   | 0.213871     | 0.19143   | conserved hypothetical protein                   |
| XP_009690501.1 | 0.22076     | 0.283287   | 0.779279     |            |            |              | 0.779279  | hypothetical protein                             |
| XP_009690502.1 | 0.0329106   | 0.259552   | 0.126797     |            |            |              | 0.126797  | diacylglycerol kinase                            |
| XP_009690503.1 | 0.0164147   | 0.620942   | 0.0264352    | 0.0210054  | 0.541899   | 0.0387626    | 0.032599  | RNA processing protein                           |
| XP_009690504.1 | 0.0123955   | 0.516241   | 0.024011     | 0.00394949 | 0.262589   | 0.0150406    | 0.019526  | conserved hypothetical protein                   |
| XP_009690505.1 | 0.029481    | 0.428198   | 0.0688489    | 0.0411745  | 0.302863   | 0.135951     | 0.1024    | conserved hypothetical protein                   |
| XP_009690506.1 | 0.0997881   | 0.430161   | 0.231978     | 0.0777749  | 0.348356   | 0.223263     | 0.227621  | conserved hypothetical protein                   |
| XP_009690507.1 | 0.000114663 | 0.114663   | 0.001        |            |            |              | 0.001     | splicing factor 3B subunit 5-like protein        |
| XP_009690508.1 | 0.0534581   | 0.592684   | 0.0901966    | 0.0559453  | 0.51977    | 0.107635     | 0.098916  | conserved hypothetical protein                   |
| XP_009690509.1 | NA          | NA         | NA           |            |            |              | NA        | conserved hypothetical protein                   |
| XP_009690510.1 | 0.121326    | 0.474057   | 0.255931     | 0.113022   | 0.512837   | 0.220386     | 0.238158  | conserved hypothetical protein                   |
| XP_009690511.1 | 0.0405605   | 0.5847     | 0.0693697    | 0.0539893  | 0.491225   | 0.109907     | 0.089638  | conserved hypothetical protein                   |
| XP_009690512.1 | 0.117726    | 0.510276   | 0.23071      | 0.132338   | 0.349236   | 0.378935     | 0.304822  | conserved hypothetical protein                   |
| XP_009690513.1 | 0.0177932   | 0.348104   | 0.0511145    | 0.01346    | 0.332248   | 0.0405119    | 0.045813  | uncharacterized protein                          |
| XP_009690514.1 | 0.0101265   | 0.420842   | 0.0240624    | 0.0121586  | 0.339309   | 0.0358333    | 0.029948  | 40S ribosomal protein S6                         |
| XP_009690516.1 | 0.0855224   | 0.390216   | 0.219167     | 0.0837648  | 0.288954   | 0.28989      | 0.254528  | uncharacterized protein                          |
| XP_009690517.1 | 0.0167242   | 0.452713   | 0.036942     | 0.0179963  | 0.403475   | 0.0446033    | 0.040773  | DnaI protein                                     |
| XP_009690518.1 | 0.0404344   | 1.03273    | 0.0391528    | 0.0423137  | 1.16407    | 0.0363497    | 0.037751  | uncharacterized protein                          |
| XP_009690519.1 | 0.0917042   | 0.467935   | 0.195976     | 0.0859819  | 0.415128   | 0.207121     | 0.201549  | uncharacterized protein                          |
| XP_009690520.1 | 0.0532012   | 0.652856   | 0.0814899    | 0.0612698  | 0.660798   | 0.0927209    | 0.087105  | uncharacterized protein                          |
| XP_009690521.1 | 0.0253943   | 0.483722   | 0.0524978    | 0.0174603  | 0.664082   | 0.0262924    | 0.039395  | CAMP-dependent protein kinase regulatory subunit |
| XP_009690522.1 | 0.0931137   | 0.330602   | 0.281649     | 0.111787   | 0.253444   | 0.441072     | 0.36136   | conserved hypothetical protein                   |
| XP_009690523.1 | 0.0853762   | 0.299581   | 0.284985     | 0.0120283  | 0.101373   | 0.118654     | 0.201819  | conserved hypothetical protein                   |
| XP_009690524.1 | 0.0749846   | 0.745475   | 0.100586     | 0.0670495  | 0.810448   | 0.0827315    | 0.091659  | conserved hypothetical protein                   |
| XP_009690525.1 | 0.0387465   | 0.810729   | 0.0477922    | 0.0376519  | 0.891501   | 0.0422342    | 0.045013  | ATP-dependent RNA helicase                       |
| XP_009690526.1 | 0.046132    | 0.613443   | 0.0752018    | 0.044734   | 0.670509   | 0.0667164    | 0.070959  | conserved hypothetical protein                   |
| XP_009690527.1 | 0.0814766   | 0.716406   | 0.11373      | 0.0784828  | 0.865909   | 0.0906363    | 0.102183  | uncharacterized protein                          |
| XP_009690529.1 | 0.0548923   | 0.848396   | 0.0647012    | 0.0539228  | 1.15753    | 0.0465844    | 0.055643  | uncharacterized protein                          |
| XP_009690530.1 | 0.0233887   | 0.257804   | 0.0907228    | 0.026532   | 0.19616    | 0.135257     | 0.11299   | conserved hypothetical protein                   |
| XP_009690531.1 | 0.102059    | 0.533477   | 0.191308     | 0.0852788  | 0.558972   | 0.152564     | 0.171936  | uncharacterized protein                          |
| XP_009690532.1 | 0.0520044   | 0.871148   | 0.0596964    | 0.0460866  | 1.0499     | 0.0438963    | 0.051796  | uncharacterized protein                          |
| XP_009690533.1 | 0.0349841   | 0.353866   | 0.0988627    | 0.0343697  | 0.425375   | 0.0807987    | 0.089831  | autophagy-related peptidase                      |
| XP_009690534.1 | 0.0275412   | 0.802338   | 0.0343262    | 0.0279421  | 0.99857    | 0.0279821    | 0.031154  | conserved hypothetical protein                   |
| XP_009690535.1 | 0.0115397   | 0.512498   | 0.0225165    | 0.0172994  | 0.582271   | 0.0297102    | 0.026113  | centromere/microtubule binding protein           |
| XP_009690536.1 | 0.0651566   | 0.561556   | 0.116029     | 0.0530749  | 0.650739   | 0.0815611    | 0.098795  | DNA helicase                                     |
| XP_009690537.1 | 0.0531092   | 0.399831   | 0.132829     | 0.0394232  | 0.492138   | 0.080106     | 0.106467  | uncharacterized protein                          |
| XP_009690538.1 | 0.0305747   | 0.636241   | 0.0480552    | 0.0394836  | 0.882075   | 0.0447622    | 0.046409  | chromatin-binding protein                        |
| XP_009690539.1 | 0.145069    | 0.530269   | 0.273576     | 0.147309   | 0.502494   | 0.293155     | 0.283365  | uncharacterized protein                          |
| XP_009690540.1 | 0.076283    | 0.3946     | 0.193317     | 0.0749369  | 0.440115   | 0.170267     | 0.181792  | conserved hypothetical protein                   |
| XP_009690541.1 | 0.0943956   | 0.0910686  | 1.03653      |            |            |              | 1.03653   | hypothetical protein                             |
| XP_009690542.1 | 0.103741    | 0.0891399  | 1.1638       |            |            |              | 1.1638    | hypothetical protein                             |
| XP_009690543.1 | 0.0502974   | 0.699389   | 0.0719162    | 0.050627   | 0.654034   | 0.0774073    | 0.074662  | predicted protein                                |
| XP_009690544.1 | 0.112399    | 0.947691   | 0.118603     | 0.11489    | 0.802754   | 0.14312      | 0.130861  | uncharacterized protein                          |
| XP_009690545.1 | 0.234623    | 0.542909   | 0.432159     | 0.2665     | 0.408885   | 0.651774     | 0.541967  | hypothetical protein                             |

| protein_id     | Chitose_ka | Chitose_ks | Chitose_kaks | Buffeli_ka | Buffeli_ks | Buffeli_kaks | mean_kaks | function                                          |
|----------------|------------|------------|--------------|------------|------------|--------------|-----------|---------------------------------------------------|
| XP_009690546.1 | 0.0375736  | 0.462345   | 0.0812674    | 0.0457171  | 0.608864   | 0.0750859    | 0.078177  | uncharacterized protein                           |
| XP_009690547.1 | 0.0371532  | 0.511141   | 0.0726867    | 0.0317117  | 0.652653   | 0.0485889    | 0.060638  | ATP-dependent RNA helicase                        |
| XP_009690548.1 | 0.0676527  | 0.59547    | 0.113612     | 0.0761042  | 0.564055   | 0.134923     | 0.124268  | conserved hypothetical protein                    |
| XP_009690549.1 | 0.105657   | 0.316669   | 0.333652     | 0.0669715  | 0.310227   | 0.215879     | 0.274765  | conserved hypothetical protein                    |
| XP_009690550.1 | 0.0181672  | 0.265121   | 0.068524     | 0.025795   | 0.370417   | 0.0696379    | 0.069081  | CDK-activating kinase assembly factor             |
| XP_009690551.1 | 0.0308866  | 0.552397   | 0.0559138    | 0.0225604  | 0.530955   | 0.0424903    | 0.049202  | uncharacterized protein                           |
| XP_009690552.1 | 0.0339482  | 0.773478   | 0.0438903    | 0.0321936  | 0.735936   | 0.0437451    | 0.043818  | calcium-transporting ATPase                       |
| XP_009690553.1 | 0.0412618  | 0.414813   | 0.0994708    | 0.0409898  | 0.375272   | 0.109227     | 0.104349  | N2%2CN2-dimethylguanosine tRNA methyltransferase  |
| XP_009690554.1 | 0.0302266  | 0.179709   | 0.168197     | 0.0211134  | 0.238975   | 0.0883501    | 0.128274  | hypothetical protein                              |
| XP_009690555.1 | 0.0322912  | 0.251787   | 0.128248     | 0.0184279  | 0.372055   | 0.04953      | 0.088889  | ubiquitin fusion degradation protein              |
| XP_009690556.1 | 0.0294368  | 0.717353   | 0.0410353    | 0.00619319 | 0.176495   | 0.0350898    | 0.038063  | uncharacterized protein                           |
| XP_009690557.1 | 0.0112257  | 0.985378   | 0.0113923    | 0.00988375 | 1.05957    | 0.00932809   | 0.01036   | DNA replication licensing factor                  |
| XP_009690558.1 | 0.0576898  | 0.383838   | 0.150297     | 0.0488129  | 0.48405    | 0.100843     | 0.12557   | conserved hypothetical protein                    |
| XP_009690559.1 | 0.0561595  | 0.359428   | 0.156247     | 0.0555274  | 0.314814   | 0.176382     | 0.166315  | conserved hypothetical protein                    |
| XP_009690560.1 | 0.167629   | 0.165291   | 1.01414      | NA         | NA         | NA           | NA        | hypothetical protein                              |
| XP_009690561.1 | 0.0715322  | 0.181887   | 0.393278     | NA         | NA         | NA           | NA        | conserved hypothetical protein                    |
| XP_009690562.1 | 0.0402393  | 0.38308    | 0.105041     | 0.049763   | 0.411066   | 0.121058     | 0.113049  | conserved hypothetical protein                    |
| XP_009690563.1 | 0.0567353  | 0.427621   | 0.132676     | 0.0550378  | 0.562992   | 0.0977594    | 0.115218  | 5'-3' exonuclease                                 |
| XP_009690564.1 | 0.0347274  | 0.848971   | 0.0409052    | 0.0247593  | 0.632839   | 0.0391241    | 0.040015  | uncharacterized protein                           |
| XP_009690565.1 | 0.0236835  | 0.0612315  | 0.386786     |            |            |              | 0.386786  | pre-mRNA branch site protein p14                  |
| XP_009690566.1 | 0.0181783  | 0.424081   | 0.0428652    | 0.0254081  | 0.413051   | 0.0615133    | 0.052189  | conserved hypothetical protein                    |
| XP_009690567.1 | 0.0905742  | 0.39952    | 0.226708     | 0.0775617  | 0.445389   | 0.174144     | 0.200426  | conserved hypothetical protein                    |
| XP_009690568.1 | 0.0755087  | 0.700227   | 0.107835     | 0.0764165  | 0.661824   | 0.115463     | 0.111649  | isoleucyl-tRNA synthetase                         |
| XP_009690569.1 | 0.0831008  | 0.378882   | 0.219332     | 0.0753365  | 0.358889   | 0.209915     | 0.214623  | brain protein 44-like                             |
| XP_009690570.1 | 0.0293636  | 0.331439   | 0.0885942    | 0.0451503  | 0.307592   | 0.146786     | 0.11769   | U1 small nuclear ribonucleoprotein                |
| XP_009690571.1 | 0.0518006  | 0.56862    | 0.0910988    | 0.050623   | 0.676103   | 0.0748747    | 0.082987  | NADH-cytochrome b5 reductase                      |
| XP_009690572.1 | 0.0184057  | 0.890473   | 0.0206696    | 0.0135473  | 0.873728   | 0.0155052    | 0.018087  | small GTPase                                      |
| XP_009690573.1 | 0.0401864  | 0.466007   | 0.0862355    | 0.0311655  | 0.540326   | 0.0576791    | 0.071957  | uncharacterized protein                           |
| XP_009690574.1 | 0.0501637  | 0.437345   | 0.114701     | 0.0519538  | 0.445931   | 0.116506     | 0.115603  | lariat debranching enzyme                         |
| XP_009690575.1 | 0.0742618  | 0.643931   | 0.115326     | 0.0615944  | 0.539057   | 0.114263     | 0.114794  | conserved hypothetical protein                    |
| XP_009690576.1 | 0.010126   | 0.883662   | 0.0114591    | 0.0256185  | 0.901671   | 0.0284123    | 0.019936  | nucleolar protein Nop5                            |
| XP_009690577.1 | 0.179437   | 0.327765   | 0.547457     | 0.207791   | 0.471775   | 0.440444     | 0.49395   | hypothetical protein                              |
| XP_009690578.1 | 0.0910163  | 0.373284   | 0.243826     | 0.0780802  | 0.502715   | 0.155317     | 0.199572  | hypothetical protein                              |
| XP_009690579.1 | 0.0674253  | 0.110261   | 0.611508     |            |            |              | 0.611508  | hypothetical protein                              |
| XP_009690580.1 | 0.0444493  | 0.414104   | 0.107339     | 0.0319409  | 0.314446   | 0.101578     | 0.104459  | TS-Ikeda type piroplasm surface protein precursor |
| XP_009690581.1 | 0.0362581  | 0.541286   | 0.0669852    | 0.0238796  | 0.375845   | 0.0635359    | 0.065261  | conserved hypothetical protein                    |
| XP_009690582.1 | 0.062058   | 0.468103   | 0.132573     | 0.0608995  | 0.284233   | 0.214259     | 0.173416  | conserved hypothetical protein                    |
| XP_009690583.1 | 0.0385993  | 0.759498   | 0.050822     | 0.0609817  | 0.605947   | 0.100639     | 0.075731  | conserved hypothetical protein                    |
| XP_009690584.1 | 0.0516286  | 0.4573     | 0.112899     | 0.0275828  | 0.348638   | 0.0791158    | 0.096007  | conserved hypothetical protein                    |
| XP_009690585.1 | 0.0295683  | 0.763572   | 0.0387237    | 0.0273841  | 0.595375   | 0.0459946    | 0.042359  | sulfate transporter                               |
| XP_009690586.1 | NA         | NA         | NA           |            |            |              | NA        | hypothetical protein                              |
| XP_009690587.1 | 0.0410776  | 0.454899   | 0.0903006    | 0.0427023  | 0.558849   | 0.0764111    | 0.083356  | conserved hypothetical protein                    |
| XP_009690588.1 | 0.107283   | 0.326519   | 0.328567     | 0.0916021  | 0.318659   | 0.287461     | 0.308014  | cyclophilin-RNA interacting protein               |
| XP_009690589.1 | 0.0876864  | 0.498581   | 0.175872     | 0.0847352  | 0.526728   | 0.160871     | 0.168372  | conserved hypothetical protein                    |
| XP_009690590.1 | 0.0214078  | 0.328702   | 0.0651282    | 0.018548   | 0.341682   | 0.0542844    | 0.059706  | uncharacterized protein                           |
| XP_009690591.1 | 0.0157956  | 0.461749   | 0.0342081    | 0.038526   | 0.365166   | 0.105503     | 0.069856  | conserved hypothetical protein                    |
| XP_009690592.1 | 0.0280955  | 0.398416   | 0.0705179    | 0.0188482  | 0.29301    | 0.064326     | 0.067422  | nucleolar protein                                 |
| XP_009690593.1 | 0.0310069  | 0.378041   | 0.08202      | 0.0342429  | 0.382106   | 0.0896162    | 0.085818  | GTPase                                            |
| XP_009690594.1 | 0.0158408  | 0.251177   | 0.0630664    | 0.0124919  | 0.298028   | 0.0419154    | 0.052491  | proteasome subunit y                              |
| XP_009690595.1 | 0.0479516  | 0.348888   | 0.137441     | 0.0348541  | 0.356269   | 0.097831     | 0.117636  | conserved hypothetical protein                    |
| XP_009690596.1 | 0.0973817  | 0.478046   | 0.203708     | 0.0738673  | 0.505992   | 0.145985     | 0.174847  | uncharacterized protein                           |
| XP_009690597.1 | 0.11512    | 0.581205   | 0.198072     | 0.105021   | 0.511232   | 0.205427     | 0.201749  | uncharacterized protein                           |
| XP_009690598.1 | 0.0326749  | 0.564781   | 0.0578542    | 0.0296261  | 0.509523   | 0.0581448    | 0.058     | uncharacterized protein                           |

| protein_id     | Chitose_ka | Chitose_ks | Chitose_kaks | Buffeli_ka  | Buffeli_ks | Buffeli_kaks | mean_kaks | function                                                              |
|----------------|------------|------------|--------------|-------------|------------|--------------|-----------|-----------------------------------------------------------------------|
| XP_009690599.1 | 0.0679042  | 0.474225   | 0.14319      | 0.0541448   | 0.462941   | 0.116959     | 0.130075  | proline synthetase associated protein                                 |
| XP_009690600.1 | 0.0562174  | 0.416824   | 0.134871     | 0.0630348   | 0.423223   | 0.14894      | 0.141905  | uncharacterized protein                                               |
| XP_009690601.1 | 0.0414705  | 0.24932    | 0.166335     | NA          | NA         | NA           | NA        | conserved hypothetical protein                                        |
| XP_009690602.1 | 0.0167968  | 0.469074   | 0.0358085    | 0.01453     | 0.552611   | 0.0262933    | 0.031051  | 60S ribosomal protein L4/L1                                           |
| XP_009690603.1 | 0.286863   | 0.14949    | 1.91894      | NA          | NA         | NA           | NA        | hypothetical protein                                                  |
| XP_009690604.1 | 0.116791   | 1.05857    | 0.110329     | 0.116271    | 0.999682   | 0.116308     | 0.113318  | conserved hypothetical protein                                        |
| XP_009690605.1 | 0.035704   | 0.290669   | 0.122834     | 0.0336918   | 0.280009   | 0.120324     | 0.121579  | conserved hypothetical protein                                        |
| XP_009690606.1 | 0.00834191 | 0.285998   | 0.0291677    | 0.00994662  | 0.493117   | 0.0201709    | 0.024669  | conserved hypothetical protein                                        |
| XP_009690607.1 | 0.085097   | 0.203069   | 0.419054     | 0.0815824   | 0.349968   | 0.233114     | 0.326084  | conserved hypothetical protein                                        |
| XP_009690608.1 | 0.0521825  | 0.158706   | 0.3288       | 0.0873771   | 0.567912   | 0.153857     | 0.241329  | guanylate kinase                                                      |
| XP_009690609.1 | 0.0261065  | 0.728874   | 0.0358176    | 0.0175975   | 0.642609   | 0.0273844    | 0.031601  | pyrophosphate-fructose 6-phosphate 1-phosphotransferase subunit alpha |
| XP_009690610.1 | 0.0627732  | 1.01872    | 0.0616196    | 0.0610759   | 0.817875   | 0.0746762    | 0.068148  | conserved hypothetical protein                                        |
| XP_009690612.1 | 0.0387868  | 0.601136   | 0.0645224    | 0.0384921   | 0.619836   | 0.0621004    | 0.063311  | peptidyl-prolyl cis-trans isomerase                                   |
| XP_009690613.1 | 0.0241055  | 0.433328   | 0.0556287    | 0.016463    | 0.460487   | 0.0357512    | 0.04569   | conserved hypothetical protein                                        |
| XP_009690614.1 | 0.0777997  | 0.707346   | 0.109988     | 0.0902358   | 0.725471   | 0.124382     | 0.117185  | conserved hypothetical protein                                        |
| XP_009690615.1 | 0.103254   | 0.450346   | 0.229278     | 0.084905    | 0.436669   | 0.194438     | 0.211858  | conserved hypothetical protein                                        |
| XP_009690616.1 | 0.0175301  | 0.340105   | 0.0515433    | 0.00718003  | 0.251593   | 0.0285383    | 0.040041  | casein kinase II subunit beta                                         |
| XP_009690617.1 | 0.0189348  | 0.351655   | 0.0538449    | 0.00742481  | 0.376391   | 0.0197264    | 0.036786  | conserved hypothetical protein                                        |
| XP_009690618.1 | 0.0744028  | 0.387514   | 0.192        | 0.0673302   | 0.276128   | 0.243837     | 0.217919  | conserved hypothetical protein                                        |
| XP_009690619.1 | 0.0444198  | 0.408909   | 0.10863      | 0.026337    | 0.332766   | 0.0791455    | 0.093888  | conserved hypothetical protein                                        |
| XP_009690620.1 | 0.080541   | 0.447562   | 0.179955     | 0.0672177   | 0.34252    | 0.196244     | 0.1881    | conserved hypothetical protein                                        |
| XP_009690621.1 | 0.0185496  | 0.510274   | 0.0363523    | 0.0152223   | 0.463275   | 0.032858     | 0.034605  | uncharacterized protein                                               |
| XP_009690622.1 | 0.094619   | 0.818805   | 0.115557     | 0.0724746   | 0.586887   | 0.12349      | 0.119524  | conserved hypothetical protein                                        |
| XP_009690623.1 | 0.0954341  | 0.630683   | 0.151319     | 0.087848    | 0.438414   | 0.200377     | 0.175848  | conserved hypothetical protein                                        |
| XP_009690624.1 | 0.0406956  | 0.56677    | 0.0718027    | 0.0312817   | 0.479881   | 0.0651864    | 0.068495  | conserved hypothetical protein                                        |
| XP_009690625.1 | 0.0812349  | 0.425827   | 0.19077      | 0.0766543   | 0.370884   | 0.20668      | 0.198725  | conserved hypothetical protein                                        |
| XP_009690626.1 | 0.00862614 | 0.474768   | 0.0181692    | 0.00489482  | 0.461113   | 0.0106152    | 0.014392  | U4/U6 snRNP-associated protein                                        |
| XP_009690627.1 | 0.0331846  | 0.438085   | 0.0757494    | 2.30978E-05 | 0.0230978  | 0.001        | 0.038375  | ubiquitin-like protein                                                |
| XP_009690628.1 | 0.0343288  | 0.332748   | 0.103168     | 0.0414021   | 0.229139   | 0.180685     | 0.141927  | peptidyl-prolyl cis-trans isomerase                                   |
| XP_009690629.1 | 0.0747699  | 0.382856   | 0.195295     | 0.0465274   | 0.167793   | 0.27729      | 0.236292  | conserved hypothetical protein                                        |
| XP_009690630.1 | 0.0039623  | 0.374376   | 0.0105837    | 0.00361038  | 0.333296   | 0.0108324    | 0.010708  | proliferating cell nuclear antigen 2                                  |
| XP_009690632.1 | 0.0984052  | 0.573356   | 0.17163      | 0.0959304   | 0.475262   | 0.201847     | 0.186739  | conserved hypothetical protein                                        |
| XP_009690633.1 | 0.0176204  | 0.240804   | 0.073173     | 0.00526207  | 0.299626   | 0.0175621    | 0.045368  | transmembrane protein 17                                              |
| XP_009690635.1 | 0.0900534  | 0.414175   | 0.217428     | 0.0683804   | 0.362382   | 0.188697     | 0.203063  | conserved hypothetical protein                                        |
| XP_009690636.1 | 0.0773479  | 0.301516   | 0.25653      | 0.0563638   | 0.283122   | 0.199079     | 0.227804  | conserved hypothetical protein                                        |
| XP_009690637.1 | 0.0537062  | 0.524181   | 0.102457     | 0.0688378   | 0.435032   | 0.158236     | 0.130347  | mitochondrial carrier protein                                         |
| XP_009690638.1 | 0.212982   | 0.241762   | 0.880955     | 0.184399    | 0.167891   | 1.09832      | 0.989637  | hypothetical protein                                                  |
| XP_009690639.1 | 0.0561482  | 0.362032   | 0.155092     | 0.0907155   | 0.301063   | 0.301317     | 0.228205  | hypothetical protein                                                  |
| XP_009690640.1 | 0.00557064 | 0.421622   | 0.0132124    | 0.00367869  | 0.393851   | 0.00934031   | 0.011276  | 14-3-3 protein                                                        |
| XP_009690642.1 | 0.0156898  | 0.719924   | 0.0217937    | 0.0119252   | 0.362741   | 0.0328752    | 0.027334  | uncharacterized protein                                               |
| XP_009690643.1 | 0.00020526 | 0.20526    | 0.001        | 0.000150902 | 0.150902   | 0.001        | 0.001     | histone H2A variant                                                   |
| XP_009690644.1 | 0.0334516  | 0.25717    | 0.130076     | 0.00723385  | 0.115433   | 0.062667     | 0.096371  | uncharacterized protein                                               |
| XP_009690645.1 | 0.00107896 | 0.503658   | 0.00214225   | 0.00118801  | 0.378589   | 0.00313799   | 0.00264   | ATP-dependent RNA helicase                                            |
| XP_009690646.1 | 0.0327962  | 0.309766   | 0.105874     | 0.0149636   | 0.0435215  | 0.34382      | 0.224847  | conserved hypothetical protein                                        |
| XP_009690647.1 | 0.0902161  | 0.703794   | 0.128185     | 0.0830907   | 0.54469    | 0.152547     | 0.140366  | uncharacterized protein                                               |
| XP_009690648.1 | 0.076532   | 0.75352    | 0.101566     | 0.0585742   | 0.52504    | 0.111561     | 0.106564  | uncharacterized protein                                               |
| XP_009690649.1 | 0.0908075  | 0.238453   | 0.380819     | 0.107722    | 0.263777   | 0.408383     | 0.394601  | conserved hypothetical protein                                        |
| XP_009690650.1 | 0.0856937  | 0.37632    | 0.227715     | 0.0879326   | 0.325955   | 0.269769     | 0.248742  | thrombospondin%2C type I repeat containing protein                    |
| XP_009690651.1 | 0.0209587  | 0.228006   | 0.0919218    |             |            |              | 0.0919218 | conserved hypothetical protein                                        |
| XP_009690652.1 | 0.0464003  | 0.289816   | 0.160103     | 0.0197686   | 0.279932   | 0.0706193    | 0.115361  | conserved hypothetical protein                                        |
| XP_009690653.1 | 0.0104978  | 0.282728   | 0.0371303    | 0.0183236   | 0.228602   | 0.080155     | 0.058643  | molecular chaperone                                                   |
| XP_009690654.1 | 0.0136149  | 0.459119   | 0.0296544    | 0.00862083  | 0.418192   | 0.0206145    | 0.025134  | uncharacterized protein                                               |
| XP_009690655.1 | 0.0922612  | 0.434629   | 0.212276     | 0.0849626   | 0.297509   | 0.28558      | 0.248928  | uncharacterized protein                                               |



| protein_id     | Chitose_ka  | Chitose_ks | Chitose_kaks | Buffeli_ka | Buffeli_ks | Buffeli_kaks | mean_kaks | function                                                |
|----------------|-------------|------------|--------------|------------|------------|--------------|-----------|---------------------------------------------------------|
| XP_009690656.1 | 0.119742    | 0.486234   | 0.246264     | 0.0923373  | 0.500274   | 0.184573     | 0.215419  | conserved hypothetical protein                          |
| XP_009690657.1 | 0.090033    | 1.1464     | 0.0785352    | 0.109534   | 0.779837   | 0.140457     | 0.109496  | uncharacterized protein                                 |
| XP_009690658.1 | 0.0450494   | 0.646003   | 0.0697355    | 0.0403796  | 0.634837   | 0.0636063    | 0.066671  | serine/threonine protein kinase                         |
| XP_009690659.1 | 0.0248383   | 0.364318   | 0.0681773    |            |            |              | 0.0681773 | ribosomal RNA assembly protein                          |
| XP_009690660.1 | 0.0258292   | 0.616461   | 0.0418991    | 0.0180928  | 0.367279   | 0.0492616    | 0.04558   | uncharacterized protein                                 |
| XP_009690661.1 | 0.0340478   | 0.701077   | 0.048565     | 0.0337055  | 0.824308   | 0.0408895    | 0.044727  | 50S ribosomal protein L22                               |
| XP_009690662.1 | 0.0532251   | 0.451474   | 0.117892     | 0.0426937  | 0.503138   | 0.0848549    | 0.101373  | sodium/hydrogen exchanger                               |
| XP_009690663.1 | 0.0232811   | 0.468629   | 0.0496792    | 0.0202053  | 0.408175   | 0.0495016    | 0.04959   | splicing factor 3a subunit 2                            |
| XP_009690664.1 | 0.0565292   | 0.673064   | 0.0839879    | 0.0677276  | 0.77891    | 0.0869517    | 0.08547   | molecular chaperone protein DnaJ                        |
| XP_009690665.1 | 0.0467427   | 0.382731   | 0.122129     | 0.0461095  | 0.357557   | 0.128957     | 0.125543  | GDP-mannose pyrophosphorylase                           |
| XP_009690666.1 | 0.0144563   | 0.435509   | 0.0331941    | 0.0123438  | 0.652256   | 0.0189248    | 0.026059  | ubiquitin-conjugating enzyme E2                         |
| XP_009690667.1 | 0.0888522   | 0.460003   | 0.193156     | 0.0599372  | 0.153309   | 0.390956     | 0.292056  | uncharacterized protein                                 |
| XP_009690668.1 | 0.0318838   | 0.458623   | 0.0695207    | 0.0374362  | 0.329138   | 0.11374      | 0.09163   | clathrin-coat assembly protein                          |
| XP_009690669.1 | 0.072368    | 0.33452    | 0.216334     | 0.0540719  | 0.402153   | 0.134456     | 0.175395  | conserved hypothetical protein                          |
| XP_009690670.1 | 0.0183487   | 0.525422   | 0.0349218    | 0.0183803  | 0.408364   | 0.0450097    | 0.039966  | Conserved hypothetical protein                          |
| XP_009690671.1 | 0.0784874   | 0.54591    | 0.143774     | 0.0561123  | 0.679419   | 0.0825886    | 0.113181  | Conserved hypothetical protein                          |
| XP_009690672.1 | 0.0778893   | 0.281674   | 0.276522     | 0.0935156  | 0.240728   | 0.388471     | 0.332496  | uncharacterized protein                                 |
| XP_009690673.1 | 0.0720103   | 0.497824   | 0.14465      | 0.0683449  | 0.484147   | 0.141166     | 0.142908  | conserved hypothetical protein                          |
| XP_009690674.1 | 0.0385631   | 0.750433   | 0.0513879    | 0.036224   | 0.773353   | 0.0468402    | 0.049114  | uncharacterized protein                                 |
| XP_009690675.1 | 0.0356463   | 0.425815   | 0.083713     | 0.0283378  | 0.482822   | 0.0586919    | 0.071202  | hydrolase                                               |
| XP_009690676.1 | 0.0531799   | 0.112312   | 0.4735       |            |            |              | 0.4735    | conserved hypothetical protein                          |
| XP_009690677.1 | 0.0397392   | 0.281547   | 0.141146     | 0.0424393  | 0.295689   | 0.143527     | 0.142336  | conserved hypothetical protein                          |
| XP_009690685.1 | NA          | NA         | NA           |            |            |              | NA        | hypothetical protein                                    |
| XP_009690686.1 | 0.0888813   | 1.37961    | 0.0644247    | 0.101348   | 1.21289    | 0.0835595    | 0.073992  | choline/ethanolamine kinase                             |
| XP_009690687.1 | 0.0826842   | 0.392716   | 0.210545     |            |            |              | 0.210545  | choline/ethanolamine kinase                             |
| XP_009690689.1 | 0.0433542   | 0.492295   | 0.0880655    | 0.0351502  | 0.298274   | 0.117846     | 0.102956  | cleavage stimulation factor subunit 1                   |
| XP_009690690.1 | 0.0584513   | 0.242099   | 0.241435     | 0.0604867  | 0.25782    | 0.234609     | 0.238022  | transducin-like G-protein beta                          |
| XP_009690691.1 | 0.161517    | 0.360448   | 0.448102     | 0.186297   | 0.406937   | 0.457803     | 0.452952  | hypothetical protein                                    |
| XP_009690692.1 | 0.0715965   | 0.733941   | 0.0975507    | 0.0610509  | 0.655212   | 0.0931773    | 0.095364  | miTOT_ic checkpoint protein                             |
| XP_009690693.1 | 0.0487852   | 0.46305    | 0.105356     | 0.04371    | 0.429063   | 0.101873     | 0.103614  | serine/threonine protein kinase                         |
| XP_009690694.1 | 0.0239683   | 0.23318    | 0.102789     | 0.014015   | 0.135637   | 0.103328     | 0.103058  | phosphopanTOT_henoilcysteine decarboxylase              |
| XP_009690695.1 | 0.0390828   | 0.382407   | 0.102202     | 0.0197864  | 0.51322    | 0.0385534    | 0.070378  | uncharacterized protein                                 |
| XP_009690696.1 | 0.0523059   | 0.543814   | 0.0961834    | 0.0546403  | 0.602243   | 0.0907281    | 0.093456  | citrate synthase%2C mitochondrial precursor             |
| XP_009690697.1 | 0.0166908   | 0.234203   | 0.0712665    |            |            |              | 0.0712665 | 1-hydroxy-2-methyl-2-(e)-butenyl 4-diphosphate synthase |
| XP_009690698.1 | 0.0448626   | 0.366274   | 0.122484     | 0.0404977  | 0.230574   | 0.175639     | 0.149061  | conserved hypothetical protein                          |
| XP_009690699.1 | 0.0818509   | 0.522471   | 0.156661     | 0.0795179  | 0.486136   | 0.163571     | 0.160116  | uncharacterized protein                                 |
| XP_009690700.1 | 0.0365967   | 0.305289   | 0.119875     | 0.034148   | 0.284521   | 0.120019     | 0.119947  | ABC transporter                                         |
| XP_009690701.1 | 0.103909    | 0.383046   | 0.271269     |            |            |              | 0.271269  | uncharacterized protein                                 |
| XP_009690702.1 | 0.0827326   | 1.1491     | 0.0719977    | 0.100632   | 0.988279   | 0.101826     | 0.086912  | uncharacterized protein                                 |
| XP_009690703.1 | 0.0957007   | 0.520024   | 0.184032     | 0.107412   | 0.62317    | 0.172363     | 0.178198  | CAMP-dependent protein kinase%2C beta-catalytic subunit |
| XP_009690704.1 | 0.0221594   | 0.304746   | 0.0727143    | 0.0170698  | 0.203905   | 0.0837145    | 0.078214  | conserved hypothetical protein                          |
| XP_009690705.1 | 0.020345    | 0.490612   | 0.0414686    | 0.0176763  | 0.706846   | 0.0250073    | 0.033238  | glycerol kinase                                         |
| XP_009690706.1 | 0.0527866   | 0.371599   | 0.142053     | 0.0480128  | 0.344159   | 0.139508     | 0.140781  | membrane skeletal protein IMC1                          |
| XP_009690707.1 | 0.109664    | 0.199482   | 0.549743     | 0.0877129  | 0.285457   | 0.307271     | 0.428507  | conserved hypothetical protein                          |
| XP_009690708.1 | 0.0228632   | 0.694851   | 0.0329037    | 0.0161316  | 0.740401   | 0.0217876    | 0.027346  | conserved hypothetical protein                          |
| XP_009690709.1 | 0.137254    | 0.412939   | 0.332382     | 0.101166   | 0.409575   | 0.247002     | 0.289692  | conserved hypothetical protein                          |
| XP_009690710.1 | 0.0142834   | 0.430089   | 0.0332104    | 0.00620341 | 0.292063   | 0.02124      | 0.027225  | 60S ribosomal protein L17                               |
| XP_009690711.1 | 0.0538971   | 0.691396   | 0.077954     | 0.0373133  | 0.814617   | 0.0458048    | 0.061879  | conserved hypothetical protein                          |
| XP_009690712.1 | 0.108195    | 0.550009   | 0.196714     | 0.100846   | 0.5401     | 0.186717     | 0.191715  | conserved hypothetical protein                          |
| XP_009690713.1 | 0.000330863 | 0.330863   | 0.001        | 0.00412865 | 0.211149   | 0.0195532    | 0.010277  | calmodulin                                              |
| XP_009690714.1 | 0.0631813   | 0.617707   | 0.102284     | 0.0858031  | 0.517464   | 0.165815     | 0.134049  | uncharacterized protein                                 |
| XP_009690715.1 | 0.0227256   | 0.443368   | 0.0512568    | 0.0330772  | 0.529298   | 0.0624926    | 0.056875  | uncharacterized protein                                 |
| XP_009690716.1 | 0.0221086   | 0.453881   | 0.0487101    | 0.0184783  | 0.539777   | 0.0342332    | 0.041472  | uncharacterized protein                                 |

| protein_id     | Chitose_ka  | Chitose_ks | Chitose_kaks | Buffeli_ka  | Buffeli_ks | Buffeli_kaks | mean_kaks | function                                                              |
|----------------|-------------|------------|--------------|-------------|------------|--------------|-----------|-----------------------------------------------------------------------|
| XP_009690718.1 | 0.0282589   | 0.330665   | 0.0854606    | 0.0242163   | 0.321398   | 0.0753467    | 0.080404  | uncharacterized protein                                               |
| XP_009690719.1 | 0.0366789   | 0.344096   | 0.106595     | 0.0262385   | 0.323821   | 0.0810276    | 0.093811  | uncharacterized protein                                               |
| XP_009690720.1 | 0.00797182  | 0.462264   | 0.0172452    |             |            |              | 0.0172452 | Ngp                                                                   |
| XP_009690721.1 | 0.049626    | 0.298327   | 0.166348     |             |            |              | 0.166348  | uncharacterized protein                                               |
| XP_009690722.1 | 0.0474017   | 0.537947   | 0.088116     | 0.0423493   | 0.611887   | 0.0692109    | 0.078663  | uncharacterized protein                                               |
| XP_009690723.1 | 0.116258    | 0.752494   | 0.154496     | 0.0848857   | 0.638721   | 0.1329       | 0.143698  | conserved hypothetical protein                                        |
| XP_009690724.1 | 0.102109    | 0.326045   | 0.313176     | 0.0881199   | 0.295346   | 0.298362     | 0.305769  | uncharacterized protein                                               |
| XP_009690725.1 | 0.090006    | 0.726559   | 0.12388      | 0.0692426   | 0.633802   | 0.10925      | 0.116565  | conserved hypothetical protein                                        |
| XP_009690726.1 | 0.0136342   | 0.474714   | 0.0287208    | 0.011767    | 0.513334   | 0.0229227    | 0.025822  | conserved hypothetical protein                                        |
| XP_009690727.1 | 0.0474412   | 0.317751   | 0.149303     | 0.0421143   | 0.34566    | 0.121838     | 0.13557   | uncharacterized protein                                               |
| XP_009690728.1 | 0.231637    | 0.0901191  | 2.57035      |             |            |              | 2.57035   | hypothetical protein                                                  |
| XP_009690729.1 | 0.00649394  | 0.54739    | 0.0118634    | 0.00516846  | 0.553212   | 0.00934265   | 0.010603  | protein transport protein                                             |
| XP_009690730.1 | 0.000326733 | 0.326733   | 0.001        | 0.000082669 | 0.082669   | 0.001        | 0.001     | small nuclear ribonucleoprotein                                       |
| XP_009690731.1 | 0.0674563   | 0.490558   | 0.137509     | 0.070713    | 0.51934    | 0.13616      | 0.136834  | conserved hypothetical protein                                        |
| XP_009690732.1 | 0.041606    | 0.186353   | 0.223265     |             |            |              | 0.223265  | conserved hypothetical protein                                        |
| XP_009690733.1 | 0.0236334   | 0.681255   | 0.034691     | 0.0204485   | 0.72162    | 0.028337     | 0.031514  | calcium-dependent protein kinase                                      |
| XP_009690734.1 | 0.0357065   | 0.849446   | 0.0420351    | 0.0539768   | 0.675694   | 0.0798835    | 0.060959  | conserved hypothetical protein                                        |
| XP_009690735.1 | 0.0445029   | 0.396045   | 0.112368     |             |            |              | 0.112368  | conserved hypothetical protein                                        |
| XP_009690736.1 | 0.0477647   | 0.400081   | 0.119388     | 0.0407838   | 0.348867   | 0.116903     | 0.118146  | GTPase activator                                                      |
| XP_009690737.1 | 0.0556384   | 0.470799   | 0.118179     | 0.0687631   | 0.586914   | 0.11716      | 0.11767   | UMP-CMP kinase                                                        |
| XP_009690738.1 | 0.000388797 | 0.388797   | 0.001        | 0.000542805 | 0.542805   | 0.001        | 0.001     | mitochondrial distribution and morphology family 35/apoptosis protein |
| XP_009690739.1 | 0.0626177   | 0.244164   | 0.256458     | 0.0470029   | 0.356743   | 0.131756     | 0.194107  | hypothetical protein                                                  |
| XP_009690740.1 | 0.0238854   | 0.64281    | 0.0371578    | 0.0233181   | 0.642843   | 0.0362733    | 0.036716  | ubiquitin-activating enzyme E1                                        |
| XP_009690741.1 | 0.0325724   | 0.399528   | 0.0815272    | 0.0413351   | 0.395792   | 0.104437     | 0.092982  | HEAT repeat containing protein                                        |
| XP_009690742.1 | 0.0975541   | 0.517414   | 0.188542     | 0.0950151   | 0.355645   | 0.267163     | 0.227852  | conserved hypothetical protein                                        |
| XP_009690743.1 | 0.0219591   | 0.362009   | 0.0606588    |             |            |              | 0.0606588 | TatD-like deoxyribonuclease                                           |
| XP_009690744.1 | 0.0558975   | 0.459035   | 0.121772     | 0.0488616   | 0.437021   | 0.111806     | 0.116789  | kinesin-like protein                                                  |
| XP_009690745.1 | 0.0566674   | 0.506848   | 0.111804     | 0.0580814   | 0.384368   | 0.151109     | 0.131457  | uncharacterized protein                                               |
| XP_009690746.1 | 0.0377489   | 0.461542   | 0.0817887    | 0.0222054   | 0.232124   | 0.0956618    | 0.088725  | CDC6-like ATPase                                                      |
| XP_009690747.1 | 0.017856    | 0.19041    | 0.0937765    |             |            |              | 0.0937765 | conserved hypothetical protein                                        |
| XP_009690748.1 | 0.0614231   | 0.320479   | 0.19166      | 0.0426387   | 0.368169   | 0.115813     | 0.153736  | 4-diphosphocytidyl-2c-methyl-D-erythritol kinase                      |
| XP_009690749.1 | 0.0386183   | 0.264751   | 0.145866     | 0.0273227   | 0.285863   | 0.0955796    | 0.120723  | 50S ribosomal protein L28                                             |
| XP_009690750.1 | 0.00953017  | 0.190869   | 0.0499305    | 2.98333E-05 | 0.0298333  | 0.001        | 0.025465  | conserved hypothetical protein                                        |
| XP_009690751.1 | 0.013098    | 0.165317   | 0.0792294    | 0.0238747   | 0.146161   | 0.163345     | 0.121287  | eukaryotic translation initiation factor 2 beta                       |
| XP_009690752.1 | 0.00838437  | 0.367694   | 0.0228025    |             |            |              | 0.0228025 | YOR3162c protein                                                      |
| XP_009690753.1 | 0.0489375   | 0.707719   | 0.0691482    | 0.0542424   | 0.606803   | 0.0893905    | 0.079269  | uncharacterized protein                                               |
| XP_009690754.1 | 0.089353    | 0.544097   | 0.164222     | 0.0668625   | 0.473998   | 0.141061     | 0.152641  | uncharacterized protein                                               |
| XP_009690755.1 | 0.0725262   | 0.829482   | 0.0874355    | 0.074145    | 0.912356   | 0.0812677    | 0.084352  | major facilitator superfamily MFS-1 protein                           |
| XP_009690756.1 | 0.0545447   | 0.849969   | 0.0641726    | 0.042525    | 0.817148   | 0.0520407    | 0.058107  | conserved hypothetical protein                                        |
| XP_009690757.1 | 0.108868    | 0.737916   | 0.147534     | 0.0973097   | 0.724997   | 0.134221     | 0.140877  | major facilitator superfamily MFS-1 protein                           |
| XP_009690758.1 | 0.0352784   | 0.420127   | 0.0839709    | 0.0162492   | 0.351087   | 0.0462825    | 0.065127  | uncharacterized protein                                               |
| XP_009690759.1 | 0.043887    | 0.447866   | 0.0979915    | 0.0339979   | 0.434141   | 0.0783107    | 0.088151  | uncharacterized protein                                               |
| XP_009690760.1 | 0.0429362   | 0.450536   | 0.0953004    | 0.0246549   | 0.478668   | 0.0515074    | 0.073404  | vacuolar-protein sorting-associated protein                           |
| XP_009690761.1 | 0.00924778  | 0.130391   | 0.0709236    |             |            |              | 0.0709236 | 1-acylglycerol-3-phosphate O-acyltransferase                          |
| XP_009690762.1 | NA          | NA         | NA           |             |            |              | NA        | hypothetical protein                                                  |
| XP_009690763.1 | 0.063451    | 0.226352   | 0.280321     | 0.0335048   | 0.060857   | 0.55055      | 0.415435  | uncharacterized protein                                               |
| XP_009690764.1 | 0.0844491   | 0.601531   | 0.14039      | 0.112293    | 0.646131   | 0.173793     | 0.157091  | conserved hypothetical protein                                        |
| XP_009690765.1 | 0.0723802   | 0.336276   | 0.21524      | 0.07685     | 0.350471   | 0.219276     | 0.217258  | uncharacterized protein                                               |
| XP_009690768.1 | 0.11137     | 0.432464   | 0.257525     | 0.122669    | 0.545211   | 0.224993     | 0.241259  | conserved hypothetical protein                                        |
| XP_009690769.1 |             |            |              | 0.0562628   | 0.136379   | 0.412547     | 0.412547  | conserved hypothetical protein                                        |
| XP_009690771.1 | 0.0299663   | 0.819459   | 0.0365684    | 0.0361016   | 0.622305   | 0.0580127    | 0.047291  | ATP-dependent RNA helicase                                            |
| XP_009690772.1 | 1.69661E-05 | 0.0169661  | 0.001        |             |            |              | 0.001     | small nuclear ribonucleoprotein                                       |
| XP_009690773.1 | 0.0393864   | 0.564983   | 0.0697125    | 0.0377249   | 0.675011   | 0.0558879    | 0.0628    | conserved hypothetical protein                                        |

| protein_id     | Chitose_ka  | Chitose_ks | Chitose_kaks | Buffeli_ka  | Buffeli_ks | Buffeli_kaks | mean_kaks | function                                                  |
|----------------|-------------|------------|--------------|-------------|------------|--------------|-----------|-----------------------------------------------------------|
| XP_009690774.1 | 0.104057    | 0.632628   | 0.164484     | 0.071103    | 0.763408   | 0.0930434    | 0.128764  | conserved hypothetical protein                            |
| XP_009690775.1 | 0.0392358   | 0.363297   | 0.107999     |             |            |              | 0.107999  | uncharacterized protein                                   |
| XP_009690776.1 | 0.00791607  | 0.413808   | 0.0191298    | 0.00291545  | 0.303884   | 0.00959395   | 0.014362  | initiation factor 4E                                      |
| XP_009690777.1 | 0.0992079   | 0.395688   | 0.250723     | 0.0795188   | 0.281109   | 0.282875     | 0.266799  | serine/threonine-protein kinase ripk4                     |
| XP_009690778.1 | 0.0313671   | 0.552786   | 0.0567438    | 0.0263136   | 0.514074   | 0.0511863    | 0.053965  | ABC transporter                                           |
| XP_009690779.1 | 0.140438    | 0.224515   | 0.625514     | 0.160993    | 0.167907   | 0.95882      | 0.792167  | hypothetical protein                                      |
| XP_009690780.1 | 0.199793    | 0.280978   | 0.711063     | 0.0558268   | 0.141131   | 0.395568     | 0.553315  | hypothetical protein                                      |
| XP_009690781.1 | 0.0640693   | 0.427961   | 0.149708     | 0.0678894   | 0.452832   | 0.149922     | 0.149815  | uncharacterized protein                                   |
| XP_009690783.1 | 0.137467    | 0.351105   | 0.391526     | 0.11667     | 0.513736   | 0.2271       | 0.309313  | conserved hypothetical protein                            |
| XP_009690784.1 | 0.143779    | 0.230272   | 0.624387     |             |            |              | 0.624387  | hypothetical protein                                      |
| XP_009690788.1 | 0.0458049   | 0.107293   | 0.426914     |             |            |              | 0.426914  | conserved hypothetical protein                            |
| XP_009690789.1 | 0.134261    | 0.508749   | 0.263903     | 0.103468    | 0.925072   | 0.111849     | 0.187876  | conserved hypothetical protein                            |
| XP_009690790.1 | 0.0299911   | 0.473169   | 0.0633834    | 0.0361138   | 0.540072   | 0.0668684    | 0.065126  | uncharacterized protein                                   |
| XP_009690791.1 | 0.0570488   | 0.293536   | 0.19435      | 0.0571366   | 0.232598   | 0.245645     | 0.219998  | uncharacterized protein                                   |
| XP_009690792.1 | 0.116474    | 0.859667   | 0.135487     | 0.115633    | 0.731499   | 0.158077     | 0.146782  | conserved hypothetical protein                            |
| XP_009690793.1 | 0.0933476   | 0.598992   | 0.155841     | 0.0815799   | 0.595526   | 0.136988     | 0.146415  | farnesyl-protein transferase beta subunit                 |
| XP_009690794.1 | 0.0894823   | 0.339036   | 0.263931     | 0.09055     | 0.353412   | 0.256216     | 0.260074  | uncharacterized protein                                   |
| XP_009690795.1 | 0.0861012   | 0.725855   | 0.11862      | 0.0814496   | 0.682214   | 0.11939      | 0.119005  | conserved hypothetical protein                            |
| XP_009690796.1 | 0.108902    | 0.347086   | 0.313759     | 0.15196     | 1.06048    | 0.143294     | 0.228527  | uncharacterized protein                                   |
| XP_009690797.1 | 0.0992819   | 0.585476   | 0.169575     | 0.0945145   | 0.718155   | 0.131607     | 0.150591  | uncharacterized protein                                   |
| XP_009690798.1 | 0.0276771   | 0.650959   | 0.0425175    | 0.0216227   | 0.674774   | 0.0320443    | 0.037281  | conserved hypothetical protein                            |
| XP_009690799.1 | 0.000131521 | 0.131521   | 0.001        |             |            |              | 0.001     | lipid-binding protein                                     |
| XP_009690800.1 | 0.017605    | 0.292714   | 0.0601439    | 0.0187088   | 0.478036   | 0.0391369    | 0.04964   | 60S ribosomal protein L18                                 |
| XP_009690801.1 | 0.0272951   | 0.48986    | 0.0557201    | 0.0189879   | 0.481749   | 0.0394145    | 0.047567  | 60S ribosomal protein L18                                 |
| XP_009690803.1 | 0.0644242   | 0.365235   | 0.176391     |             |            |              | 0.176391  | conserved hypothetical protein                            |
| XP_009690804.1 | 0.000248256 | 0.248256   | 0.001        | 0.000319974 | 0.319974   | 0.001        | 0.001     | small GTP binding protein rab6                            |
| XP_009690805.1 | 0.0507547   | 0.348036   | 0.145832     | 0.048044    | 0.296919   | 0.161808     | 0.15382   | uncharacterized protein                                   |
| XP_009690806.1 | 0.007543    | 0.0736557  | 0.102409     |             |            |              | 0.102409  | farnesyltransferase beta subunit                          |
| XP_009690808.1 | 0.086251    | 0.609078   | 0.141609     | 0.0674263   | 0.585962   | 0.115069     | 0.128339  | conserved hypothetical protein                            |
| XP_009690809.1 | 0.0821328   | 1.01957    | 0.0805563    | 0.0900019   | 1.00877    | 0.0892194    | 0.084888  | uncharacterized protein                                   |
| XP_009690810.1 | 0.128182    | 0.11172    | 1.14734      | 0.114433    | 0.14598    | 0.783893     | 0.965616  | hypothetical protein                                      |
| XP_009690811.1 | 0.0362738   | 0.610192   | 0.0594465    | 0.0440206   | 0.816431   | 0.0539183    | 0.056682  | conserved hypothetical protein                            |
| XP_009690812.1 | 0.0666654   | 0.718634   | 0.0927668    | 0.0781978   | 0.770975   | 0.101427     | 0.097097  | uncharacterized protein                                   |
| XP_009690813.1 | 0.0951617   | 0.537911   | 0.17691      | 0.0748435   | 0.475007   | 0.157563     | 0.167237  | conserved hypothetical protein                            |
| XP_009690814.1 | 0.0477803   | 0.467904   | 0.102116     | 0.0523765   | 0.497993   | 0.105175     | 0.103646  | conserved hypothetical protein                            |
| XP_009690815.1 | 0.116543    | 0.313753   | 0.371448     | 0.0854794   | 0.284393   | 0.300568     | 0.336008  | hypothetical protein                                      |
| XP_009690816.1 | 0.106086    | 0.804954   | 0.131792     | 0.0915008   | 0.748042   | 0.12232      | 0.127056  | conserved hypothetical protein                            |
| XP_009690817.1 | 0.0491763   | 1.09098    | 0.0450755    | 0.0319619   | 1.14991    | 0.0277952    | 0.036435  | conserved hypothetical protein                            |
| XP_009690818.1 | 0.0268952   | 0.425238   | 0.0632475    |             |            |              | 0.0632475 | uncharacterized protein                                   |
| XP_009690820.1 | 0.0579756   | 0.596112   | 0.0972561    | 0.0625559   | 0.701244   | 0.089207     | 0.093232  | uncharacterized protein                                   |
| XP_009690821.1 | 0.0665372   | 0.490329   | 0.135699     | 0.0517405   | 0.394224   | 0.131247     | 0.133473  | chromatin assembly protein                                |
| XP_009690822.1 | 0.0348843   | 0.382384   | 0.0912284    | 0.024862    | 0.329755   | 0.0753954    | 0.083312  | cytochrome C-type heme lyase                              |
| XP_009690823.1 | 0.010749    | 1.66746    | 0.00644637   | 0.00801112  | 1.28192    | 0.00624932   | 0.006348  | uncharacterized protein                                   |
| XP_009690824.1 | 0.0128903   | 0.586084   | 0.0219939    | 0.0103298   | 0.408978   | 0.0252576    | 0.023626  | phosphatidylinositol/phosphatidylcholine transfer protein |
| XP_009690825.1 | 0.0991355   | 0.00199362 | 49.7264      |             |            |              | 49.7264   | hypothetical protein                                      |
| XP_009690827.1 | 0.0948631   | 0.544856   | 0.174107     | 0.0675702   | 0.739046   | 0.0914289    | 0.132768  | conserved hypothetical protein                            |
| XP_009690828.1 | 0.0515176   | 0.27412    | 0.187938     | 0.061639    | 0.325196   | 0.189544     | 0.188741  | uncharacterized protein                                   |
| XP_009690829.1 | 0.151441    | 0.0976654  | 1.55061      |             |            |              | 1.55061   | hypothetical protein                                      |
| XP_009690830.1 | 0.0954312   | 0.297131   | 0.321175     | 0.162185    | 0.163345   | 0.992898     | 0.657037  | hypothetical protein                                      |
| XP_009690831.1 | 0.0596218   | 0.529746   | 0.112548     | 0.040892    | 0.31748    | 0.128802     | 0.120675  | conserved hypothetical protein                            |
| XP_009690832.1 | 0.00708831  | 0.779841   | 0.00908944   | 0.0116934   | 0.587307   | 0.0199103    | 0.0145    | ribosomal protein S2                                      |
| XP_009690833.1 |             |            |              | 7.27476E-05 | 0.0727476  | 0.001        | 0.001     | conserved hypothetical protein                            |
| XP_009690834.1 |             |            | NA           | NA          | NA         | NA           | NA        | conserved hypothetical protein                            |

| protein_id     | Chitose_ka | Chitose_ks | Chitose_kaks | Buffeli_ka  | Buffeli_ks | Buffeli_kaks | mean_kaks | function                                        |
|----------------|------------|------------|--------------|-------------|------------|--------------|-----------|-------------------------------------------------|
| XP_009690835.1 | 0.0529233  | 0.382279   | 0.138442     | 0.0337535   | 0.212523   | 0.158823     | 0.148633  | uncharacterized protein                         |
| XP_009690836.1 | 0.101729   | 0.37858    | 0.268712     |             |            |              | 0.268712  | conserved hypothetical protein                  |
| XP_009690837.1 | 0.10489    | 0.48009    | 0.21848      | 0.120807    | 0.455578   | 0.265173     | 0.241826  | conserved hypothetical protein                  |
| XP_009690838.1 | 0.0646464  | 0.180798   | 0.357561     |             |            |              | 0.357561  | hypothetical protein                            |
| XP_009690839.1 | 0.0782082  | 0.371237   | 0.210669     | 0.0967934   | 0.379255   | 0.25522      | 0.232944  | conserved hypothetical protein                  |
| XP_009690840.1 | 0.0498296  | 0.55683    | 0.0894881    | 0.042363    | 0.636827   | 0.066522     | 0.078005  | cation transporting ATPase                      |
| XP_009690841.1 | 0.07208    | 0.427655   | 0.168547     | 0.0700636   | 0.414572   | 0.169002     | 0.168774  | uncharacterized protein                         |
| XP_009690842.1 | 0.095584   | 0.618557   | 0.154527     | 0.100741    | 1.00957    | 0.0997858    | 0.127156  | conserved hypothetical protein                  |
| XP_009690843.1 | 0.0314215  | 0.463842   | 0.067742     | 0.0283748   | 0.574825   | 0.0493625    | 0.058552  | 26S proteasome non-ATPase regulatory subunit 12 |
| XP_009690844.1 | 0.00497871 | 0.605368   | 0.00822427   | 0.000353332 | 0.353332   | 0.001        | 0.004612  | translation initiation factor eIF-1A            |
| XP_009690845.1 | 0.0407892  | 0.312389   | 0.130572     | 0.0296795   | 0.413071   | 0.0718507    | 0.101211  | DNA-directed RNA polymerases I and III subunit  |
| XP_009690846.1 | NA         | NA         | NA           |             |            |              | NA        | conserved hypothetical protein                  |
| XP_009690847.1 | 0.0399428  | 0.400305   | 0.0997809    |             |            |              | 0.0997809 | uncharacterized protein                         |
| XP_009690848.1 | 0.120707   | 0.918047   | 0.131482     | 0.119981    | 0.921181   | 0.130247     | 0.130864  | uncharacterized protein                         |
| XP_009690849.1 | 0.126869   | 0.132077   | 0.960567     |             |            |              | 0.960567  | hypothetical protein                            |
| XP_009690851.1 | 0.0734639  | 0.532237   | 0.138029     | 0.10009     | 0.591523   | 0.169208     | 0.153618  | conserved hypothetical protein                  |
| XP_009690852.1 | 0.111242   | 0.447869   | 0.248381     | 0.129173    | 0.569469   | 0.226831     | 0.237606  | conserved hypothetical protein                  |
| XP_009690853.1 | 0.0494147  | 0.359851   | 0.13732      | 0.0228456   | 0.298591   | 0.0765114    | 0.106916  | conserved hypothetical protein                  |
| XP_009690854.1 | 0.0141758  | 0.335272   | 0.0422815    |             |            |              | 0.0422815 | mitochondrial ribosomal protein S14 precursor   |
| XP_009690856.1 | 0.0365798  | 0.429805   | 0.0851079    | 0.0463854   | 0.40689    | 0.114        | 0.099554  | conserved hypothetical protein                  |
| XP_009690857.1 | 0.00356949 | 0.096527   | 0.0369792    |             |            |              | 0.0369792 | conserved hypothetical protein                  |
| XP_009690858.1 | 0.0185865  | 0.854008   | 0.0217639    | 0.0164498   | 0.604506   | 0.0272119    | 0.024488  | heat shock protein 70 precursor                 |
| XP_009690859.1 | 0.11106    | 0.347818   | 0.319304     | 0.112757    | 0.217366   | 0.518744     | 0.419024  | uncharacterized protein                         |
| XP_009690860.1 | 0.00768375 | 0.386767   | 0.0198666    | 0.0011994   | 0.238381   | 0.00503143   | 0.012449  | eukaryotic peptide chain release factor         |
| XP_009690861.1 | 0.0926532  | 0.516593   | 0.179354     | 0.0853078   | 0.48358    | 0.176409     | 0.177882  | conserved hypothetical protein                  |
| XP_009690862.1 | 0.120308   | 0.624972   | 0.192502     | 0.148365    | 0.887949   | 0.167087     | 0.179795  | conserved hypothetical protein                  |
| XP_009690863.1 | 0.060806   | 0.392053   | 0.155096     | 0.0504135   | 0.559699   | 0.0900724    | 0.122584  | pentatricopeptide repeat containing protein     |
| XP_009690865.1 | 0.086624   | 0.793381   | 0.109183     | 0.0919662   | 0.746975   | 0.123118     | 0.116151  | conserved hypothetical protein                  |
| XP_009690866.1 | 0.19558    | 0.71842    | 0.272236     | 0.14908     | 0.656315   | 0.227147     | 0.249691  | conserved hypothetical protein                  |
| XP_009690868.1 | 0.0649477  | 0.21959    | 0.295768     |             |            |              | 0.295768  | hypothetical protein                            |
| XP_009690869.1 | 0.143889   | 0.600141   | 0.239759     |             |            |              | 0.239759  | uncharacterized protein                         |
| XP_009690870.1 | 0.283179   | 0.597578   | 0.473878     |             |            |              | 0.473878  | hypothetical protein                            |
| XP_009690871.1 | 0.132424   | 0.824442   | 0.160623     |             |            |              | 0.160623  | hypothetical protein                            |
| XP_009690873.1 | 0.0311258  | 0.28829    | 0.107967     | 0.0123415   | 0.121633   | 0.101466     | 0.104716  | conserved hypothetical protein                  |
| XP_009690874.1 | 0.195161   | 0.239248   | 0.815728     | 0.186342    | 0.239351   | 0.778531     | 0.79713   | hypothetical protein                            |
| XP_009690875.1 | 0.0577753  | 0.56579    | 0.102114     | 0.039375    | 0.463192   | 0.085008     | 0.093561  | conserved hypothetical protein                  |
| XP_009690876.1 | 0.0717845  | 0.469966   | 0.152744     | 0.0484153   | 0.472491   | 0.102468     | 0.127606  | conserved hypothetical protein                  |
| XP_009690877.1 | 0.116482   | 0.226645   | 0.513939     | 0.161547    | 0.279466   | 0.578054     | 0.545996  | hypothetical protein                            |
| XP_009690878.1 | 0.0538053  | 0.521742   | 0.103126     |             |            |              | 0.103126  | hypothetical protein                            |
| XP_009690879.1 | 0.0598178  | 0.58261    | 0.102672     | 0.0590346   | 0.480515   | 0.122857     | 0.112764  | ubiquitin carboxyl-terminal hydrolase           |
| XP_009690881.1 | 0.0955077  | 0.526474   | 0.18141      | 0.0805659   | 0.366977   | 0.21954      | 0.200475  | uncharacterized protein                         |
| XP_009690882.1 | 0.0717986  | 0.185476   | 0.387104     | 0.0763537   | 0.248091   | 0.307765     | 0.347434  | uncharacterized protein                         |
| XP_009690884.1 | 0.104707   | 0.729637   | 0.143506     | 0.106101    | 0.682957   | 0.155356     | 0.149431  | uncharacterized protein                         |
| XP_009690885.1 | 0.0646737  | 0.468998   | 0.137898     | 0.0838034   | 0.501236   | 0.167194     | 0.152546  | uncharacterized protein                         |
| XP_009690886.1 | 0.109828   | 0.337348   | 0.325562     | 0.13658     | 0.274153   | 0.49819      | 0.411876  | conserved hypothetical protein                  |
| XP_009690887.1 | 0.114167   | 0.386466   | 0.295413     | 0.103763    | 0.338524   | 0.306516     | 0.300964  | uncharacterized protein                         |
| XP_009690888.1 | 0.0328556  | 0.32678    | 0.100543     | 0.0333508   | 0.482346   | 0.069143     | 0.084843  | conserved hypothetical protein                  |
| XP_009690889.1 | 0.054037   | 0.480266   | 0.112515     | 0.0557971   | 0.34952    | 0.159639     | 0.136077  | asparaginyl-tRNA synthetase                     |
| XP_009690890.1 | 0.14206    | 0.463166   | 0.306715     |             |            |              | 0.306715  | conserved hypothetical protein                  |
| XP_009690891.1 | 0.148195   | 0.997102   | 0.148625     |             |            |              | 0.148625  | hypothetical protein                            |
| XP_009690892.1 | 0.0917326  | 0.476611   | 0.192468     | 0.066354    | 0.330424   | 0.200815     | 0.196641  | ankyrin repeat containing protein               |
| XP_009690893.1 |            |            |              | 0.0341882   | 0.628836   | 0.0543673    | 0.0543673 | uncharacterized protein                         |
| XP_009690894.1 | 0.0718798  | 0.896203   | 0.0802048    | 0.0113425   | 0.279111   | 0.0406378    | 0.060421  | uncharacterized protein                         |

| protein_id     | Chitose_ka | Chitose_ks | Chitose_kaks | Buffeli_ka | Buffeli_ks | Buffeli_kaks | mean_kaks | function                                                    |
|----------------|------------|------------|--------------|------------|------------|--------------|-----------|-------------------------------------------------------------|
| XP_009690895.1 |            |            |              | 0.0809926  | 0.195768   | 0.413718     | 0.413718  | hypothetical protein                                        |
| XP_009690897.1 | 0.0730581  | 0.97189    | 0.0751712    | 0.0427137  | 0.746279   | 0.0572356    | 0.066203  | hypothetical protein                                        |
| XP_009690898.1 | 0.101668   | 0.890293   | 0.114196     |            |            |              | 0.114196  | conserved hypothetical protein                              |
| XP_009690899.1 | 0.0511493  | 0.274779   | 0.186147     | 0.0183576  | 0.468658   | 0.0391705    | 0.112659  | conserved hypothetical protein                              |
| XP_009690900.1 | 0.0465527  | 0.619467   | 0.0751496    | 0.0340983  | 0.431144   | 0.079088     | 0.077119  | dolichol phosphate mannose synthase                         |
| XP_009690903.1 | 0.133437   | 0.598607   | 0.222912     | 0.121895   | 0.413039   | 0.295119     | 0.259016  | uncharacterized protein                                     |
| XP_009690905.1 | 0.0598408  | 0.52945    | 0.113024     | 0.0355537  | 0.440806   | 0.0806562    | 0.09684   | CTP:phosphorylcholine cytidyllyltransferase                 |
| XP_009690906.1 | 0.0460753  | 0.713308   | 0.0645939    | 0.049165   | 0.780854   | 0.0629631    | 0.063778  | formin binding protein 3                                    |
| XP_009690907.1 | 0.0412082  | 0.625252   | 0.0659066    | 0.0316191  | 0.428485   | 0.0737928    | 0.06985   | uncharacterized protein                                     |
| XP_009690908.1 | 0.029557   | 0.391912   | 0.0754175    | 0.0162813  | 0.312602   | 0.0520831    | 0.06375   | CDP-diacylglycerol-inositol 3-phosphatidyltransferase       |
| XP_009690909.1 | 0.0618533  | 0.449897   | 0.137483     | 0.0450506  | 0.236881   | 0.190183     | 0.163833  | uncharacterized protein                                     |
| XP_009690910.1 | 0.0855007  | 0.308723   | 0.276949     | 0.0738771  | 0.513752   | 0.143799     | 0.210374  | conserved hypothetical protein                              |
| XP_009690911.1 | 0.0541546  | 0.329665   | 0.164271     |            |            |              | 0.164271  | cathepsin-like cysteine protease                            |
| XP_009690912.1 | 0.0198181  | 0.526386   | 0.0376495    | 0.0267915  | 0.382972   | 0.0699568    | 0.053803  | uncharacterized protein                                     |
| XP_009690913.1 | 0.0274615  | 0.159922   | 0.171718     |            |            |              | 0.171718  | uncharacterized protein                                     |
| XP_009690914.1 | 0.104883   | 0.290881   | 0.360569     |            |            |              | 0.360569  | conserved hypothetical protein                              |
| XP_009690915.1 | 0.0375423  | 0.319014   | 0.117682     | 0.0216731  | 0.285348   | 0.0759531    | 0.096818  | uncharacterized protein                                     |
| XP_009690916.1 | 0.0420726  | 0.209515   | 0.200809     |            |            |              | 0.200809  | uncharacterized protein                                     |
| XP_009690917.1 | 0.031772   | 0.299596   | 0.106049     |            |            |              | 0.106049  | ADP-ribosylation factor                                     |
| XP_009690918.1 | 0.00469889 | 0.148559   | 0.0316298    |            |            |              | 0.0316298 | uncharacterized protein                                     |
| XP_009690919.1 | 0.0357145  | 0.380677   | 0.0938183    | 0.0385282  | 0.35166    | 0.109561     | 0.10169   | DNA primase small subunit                                   |
| XP_009690920.1 | 0.0258119  | 0.577956   | 0.0446607    | 0.0215503  | 0.540733   | 0.0398539    | 0.042257  | CTP synthase                                                |
| XP_009690921.1 | NA         | NA         | NA           |            |            |              | NA        | hypothetical protein                                        |
| XP_009690922.1 | 0.025904   | 0.359556   | 0.0720445    |            |            |              | 0.0720445 | subunit of proteasome activator complex                     |
| XP_009690923.1 | 0.0509023  | 0.626113   | 0.081299     | 0.0527861  | 0.776547   | 0.0679754    | 0.074637  | conserved hypothetical protein                              |
| XP_009690924.1 | 0.0543464  | 1.55758    | 0.0348915    | 0.0682632  | 3.4133     | 0.0199992    | 0.027445  | hypothetical protein                                        |
| XP_009690926.1 | 0.0837475  | 0.418939   | 0.199904     | 0.0909765  | 0.272261   | 0.334152     | 0.267028  | conserved hypothetical protein                              |
| XP_009690927.1 | 0.165434   | 0.485856   | 0.340499     | 0.121566   | 0.301234   | 0.40356      | 0.37203   | hypothetical protein                                        |
| XP_009690928.1 | 0.0694555  | 0.825179   | 0.0841703    | 0.0714826  | 0.696964   | 0.102563     | 0.093367  | uncharacterized protein                                     |
| XP_009690930.1 | 0.0485372  | 0.527688   | 0.0919808    | 0.0340129  | 0.483222   | 0.0703877    | 0.081184  | conserved hypothetical protein                              |
| XP_009690931.1 | 0.102059   | 0.353171   | 0.288979     |            |            |              | 0.288979  | hypothetical protein                                        |
| XP_009690932.1 | 0.166404   | 0.512695   | 0.324568     | 0.150477   | 0.454032   | 0.331424     | 0.327996  | conserved hypothetical protein                              |
| XP_009690933.1 | 0.177366   | 0.172833   | 1.02623      | 0.181529   | 0.166913   | 1.08757      | 1.0569    | hypothetical protein                                        |
| XP_009690934.1 | 0.107758   | 0.692105   | 0.155696     |            |            |              | 0.155696  | conserved hypothetical protein                              |
| XP_009690935.1 | 0.0989347  | 0.491864   | 0.201142     | 0.102361   | 0.385846   | 0.265291     | 0.233216  | uncharacterized protein                                     |
| XP_009690936.1 | 0.100034   | 0.852036   | 0.117406     | 0.0932501  | 0.688005   | 0.135537     | 0.126471  | conserved hypothetical protein                              |
| XP_009690937.1 | 0.0292083  | 0.584182   | 0.0499986    | 0.0263559  | 0.73339    | 0.0359371    | 0.042968  | uncharacterized protein                                     |
| XP_009690938.1 | 0.109293   | 0.889256   | 0.122903     | 0.0882138  | 0.813009   | 0.108503     | 0.115703  | uncharacterized protein                                     |
| XP_009690939.1 | 0.142813   | 0.34002    | 0.420013     |            |            |              | 0.420013  | hypothetical protein                                        |
| XP_009690940.1 | 0.0817513  | 0.122635   | 0.666624     | 0.0532987  | 0.11323    | 0.470713     | 0.568669  | hypothetical protein                                        |
| XP_009690941.1 | 0.0512576  | 1.04249    | 0.0491682    | 0.0514402  | 0.914428   | 0.0562539    | 0.052711  | uncharacterized protein                                     |
| XP_009690942.1 | 0.107316   | 0.179439   | 0.598065     | 0.2524     | 0.235258   | 1.07286      | 0.835462  | hypothetical protein                                        |
| XP_009690943.1 | 0.0526766  | 0.807819   | 0.0652085    | 0.0522311  | 0.842548   | 0.0619919    | 0.0636    | protein phosphatase 2C homolog 2                            |
| XP_009690944.1 | 0.130572   | 0.295286   | 0.442188     |            |            |              | 0.442188  | hypothetical protein                                        |
| XP_009690945.1 | 0.133513   | 0.378313   | 0.352918     | 0.131673   | 0.35128    | 0.374837     | 0.363877  | conserved hypothetical protein                              |
| XP_009690946.1 | 0.130123   | 0.443966   | 0.293091     | 0.10394    | 0.397588   | 0.261425     | 0.277258  | conserved hypothetical protein                              |
| XP_009690948.1 | 0.152875   | 0.434569   | 0.351785     |            |            |              | 0.351785  | conserved hypothetical protein                              |
| XP_009690949.1 | 0.0109523  | 0.501145   | 0.0218545    | 0.00158111 | 0.379191   | 0.00416971   | 0.013012  | serine/threonine protein phosphatase pp2a catalytic subunit |
| XP_009690950.1 | 0.0788124  | 0.880922   | 0.0894658    | 0.0383582  | 0.315613   | 0.121536     | 0.105501  | ubiquitin-related modifier 1 homolog                        |
| XP_009690951.1 | 0.0345858  | 0.560273   | 0.0617304    | 0.0182852  | 0.440537   | 0.0415065    | 0.051618  | conserved hypothetical protein                              |
| XP_009690952.1 |            |            |              | 0.0958485  | 0.831627   | 0.115254     | 0.115254  | conserved hypothetical protein                              |
| XP_009690953.1 | 0.0351983  | 0.742137   | 0.0474284    | 0.0364058  | 0.70904    | 0.0513452    | 0.049387  | guanylyl cyclase                                            |
| XP_009690954.1 | 0.0614363  | 0.411989   | 0.149121     | 0.0583297  | 0.355326   | 0.164158     | 0.156639  | uncharacterized protein                                     |

| protein_id     | Chitose_ka | Chitose_ks | Chitose_kaks | Buffeli_ka | Buffeli_ks | Buffeli_kaks | mean_kaks | function                                           |
|----------------|------------|------------|--------------|------------|------------|--------------|-----------|----------------------------------------------------|
| XP_009690955.1 | 0.102666   | 0.714938   | 0.143601     |            |            |              | 0.143601  | uncharacterized protein                            |
| XP_009690956.1 | 0.0692112  | 0.183609   | 0.37695      | 0.078235   | 0.234893   | 0.333067     | 0.355009  | conserved hypothetical protein                     |
| XP_009690958.1 | 0.0745227  | 0.476307   | 0.156459     | 0.058627   | 0.39995    | 0.146586     | 0.151523  | conserved hypothetical protein                     |
| XP_009690959.1 | 0.0844432  | 0.431091   | 0.195882     | 0.0717836  | 0.313102   | 0.229266     | 0.212574  | uncharacterized protein                            |
| XP_009690962.1 | 0.15549    | 0.631351   | 0.246281     |            |            |              | 0.246281  | conserved hypothetical protein                     |
| XP_009690963.1 | 0.117576   | 0.278016   | 0.422909     | 0.0830849  | 0.163194   | 0.509116     | 0.466012  | hypothetical protein                               |
| XP_009690964.1 | 0.079451   | 0.222165   | 0.357622     |            |            |              | 0.357622  | conserved hypothetical protein                     |
| XP_009690965.1 | 0.0892865  | 0.876635   | 0.101851     | 0.0956386  | 0.854001   | 0.111989     | 0.10692   | conserved hypothetical protein                     |
| XP_009690966.1 | 0.0607424  | 0.373811   | 0.162495     | 0.0423216  | 0.360364   | 0.117441     | 0.139968  | uncharacterized protein                            |
| XP_009690967.1 | 0.00764254 | 1.11498    | 0.0068544    | 0.00748765 | 0.889806   | 0.00841493   | 0.007635  | 26S proteasome ATPase subunit                      |
| XP_009690968.1 | 0.0956935  | 0.447831   | 0.213682     | 0.103076   | 0.476713   | 0.216222     | 0.214952  | hypothetical protein                               |
| XP_009690969.1 | 0.0568612  | 0.765387   | 0.0742909    | 0.0418479  | 0.583475   | 0.0717218    | 0.073006  | conserved hypothetical protein                     |
| XP_009690971.1 | 0.14611    | 1.23204    | 0.118592     | 0.0530177  | 1.10816    | 0.0478429    | 0.083217  | conserved hypothetical protein                     |
| XP_009690972.1 | 0.0902161  | 0.975917   | 0.0924424    | 0.0669647  | 0.955085   | 0.0701139    | 0.081278  | conserved hypothetical protein                     |
| XP_009690973.1 | 0.0991891  | 0.716355   | 0.138464     | 0.0932158  | 0.779062   | 0.119651     | 0.129057  | conserved hypothetical protein                     |
| XP_009690974.1 | 0.071555   | 0.482775   | 0.148216     | 0.0584147  | 0.421223   | 0.138679     | 0.143448  | uncharacterized protein                            |
| XP_009690975.1 | 0.0259242  | 0.426978   | 0.0607154    | 0.0415314  | 0.517288   | 0.0802869    | 0.070501  | FKBP-type peptidyl-prolyl cis-trans isomerase      |
| XP_009690976.1 | 0.0692835  | 0.638296   | 0.108544     | 0.0700795  | 0.702809   | 0.0997135    | 0.104129  | conserved hypothetical protein                     |
| XP_009690977.1 | 0.00111542 | 0.921202   | 0.00121083   | 0.0010788  | 0.929134   | 0.00116108   | 0.001186  | actin 1                                            |
| XP_009690979.1 | 0.0744459  | 0.440931   | 0.168838     | 0.0569929  | 0.524607   | 0.108639     | 0.138738  | conserved hypothetical protein                     |
| XP_009690980.1 | 0.0487132  | 0.460985   | 0.105672     | 0.0397905  | 0.447104   | 0.0889961    | 0.097334  | mono-oxygenase                                     |
| XP_009690981.1 | 0.129931   | 0.723911   | 0.179485     | 0.124822   | 1.05814    | 0.117963     | 0.148724  | conserved hypothetical protein                     |
| XP_009690982.1 | 0.0420778  | 0.357157   | 0.117813     | 0.0479718  | 0.441947   | 0.108546     | 0.11318   | conserved hypothetical protein                     |
| XP_009690983.1 | 0.0654655  | 0.505454   | 0.129518     | 0.0451437  | 0.364842   | 0.123735     | 0.226627  | uncharacterized protein                            |
| XP_009690984.1 | 0.139746   | 0.620404   | 0.22525      |            |            |              | 0.22525   | uncharacterized protein                            |
| XP_009690985.1 | 0.0400657  | 0.776014   | 0.0516301    | 0.0757547  | 0.861191   | 0.0879651    | 0.069798  | 5'-3' exonuclease                                  |
| XP_009690986.1 | 0.061651   | 0.160048   | 0.385202     |            |            |              | 0.385202  | Ran binding protein                                |
| XP_009690987.1 | 0.0484987  | 0.556779   | 0.0871058    | 0.0429895  | 0.404007   | 0.106408     | 0.096757  | conserved hypothetical protein                     |
| XP_009690988.1 | 0.0643698  | 0.605976   | 0.106225     | 0.0416789  | 0.507091   | 0.0821921    | 0.094209  | 26S protease subunit                               |
| XP_009690989.1 | 0.0676915  | 0.957078   | 0.0707273    | 0.0771276  | 0.667032   | 0.115628     | 0.093178  | formate/nitrate transporter                        |
| XP_009690990.1 | 0.0850886  | 0.856053   | 0.0993964    | 0.0848316  | 0.71847    | 0.118073     | 0.108735  | uncharacterized protein                            |
| XP_009690991.1 | 0.0625161  | 0.509917   | 0.122601     | 0.0521278  | 0.475688   | 0.109584     | 0.116093  | uncharacterized protein                            |
| XP_009690992.1 | 0.118698   | 0.287827   | 0.412394     | 0.10793    | 0.246633   | 0.437614     | 0.425004  | conserved hypothetical protein                     |
| XP_009690993.1 | 0.273342   | 0.838558   | 0.325967     | 0.133275   | 0.195506   | 0.681691     | 0.503829  | hypothetical protein                               |
| XP_009690994.1 | 0.0139661  | 0.412352   | 0.0338694    | 0.0141762  | 0.556562   | 0.025471     | 0.02967   | conserved hypothetical protein                     |
| XP_009690995.1 | 0.0650822  | 0.652538   | 0.0997372    | 0.0628292  | 0.557279   | 0.112743     | 0.10624   | uncharacterized protein                            |
| XP_009690996.1 | 0.0217961  | 0.547444   | 0.0398144    | 0.0222515  | 0.350233   | 0.0635335    | 0.051674  | uncharacterized protein                            |
| XP_009690997.1 | 0.0913462  | 0.690843   | 0.132224     | 0.0830297  | 0.459476   | 0.180705     | 0.156465  | uncharacterized protein                            |
| XP_009690998.1 | 0.0917985  | 0.817419   | 0.112303     | 0.0823926  | 0.856664   | 0.0961784    | 0.104241  | phosphoglucosamine mutase                          |
| XP_009691002.1 | 0.0572696  | 0.452538   | 0.126552     |            |            |              | 0.126552  | conserved hypothetical protein                     |
| XP_009691005.1 | 0.145961   | 0.424405   | 0.343921     | 0.109333   | 0.427582   | 0.255701     | 0.299811  | conserved hypothetical protein                     |
| XP_009691006.1 | 0.161189   | 0.107099   | 1.50506      | 0.202827   | 0.170239   | 1.19142      | 1.34824   | conserved hypothetical protein                     |
| XP_009691007.1 | 0.0503007  | 0.814588   | 0.0617499    | 0.0403978  | 0.711009   | 0.0568175    | 0.059284  | conserved hypothetical protein                     |
| XP_009691008.1 | 0.0418702  | 0.258486   | 0.161982     |            |            |              | 0.161982  | conserved hypothetical protein                     |
| XP_009691009.1 | 0.0742908  | 0.738462   | 0.100602     | 0.0757424  | 0.583457   | 0.129817     | 0.115209  | uncharacterized protein                            |
| XP_009691010.1 | 0.0436894  | 0.664018   | 0.0657955    | 0.0359279  | 0.741779   | 0.0484348    | 0.057115  | uncharacterized protein                            |
| XP_009691011.1 | 0.0427673  | 1.26832    | 0.0337196    | 0.035725   | 1.1346     | 0.0314867    | 0.032603  | glucosamine--fructose-6-phosphate aminotransferase |
| XP_009691012.1 | 0.0691034  | 0.458252   | 0.150798     | 0.0719966  | 0.45168    | 0.159397     | 0.155097  | uncharacterized protein                            |
| XP_009691013.1 | 0.0203565  | 0.537211   | 0.037893     | 0.0236767  | 0.50919    | 0.0464988    | 0.042196  | molecular chaperone protein                        |
| XP_009691014.1 | 0.0261366  | 1.05447    | 0.0247865    | 0.0238661  | 1.04494    | 0.0228396    | 0.023813  | uncharacterized protein                            |
| XP_009691015.1 | 0.138836   | 0.469804   | 0.295519     | 0.123709   | 0.401292   | 0.308277     | 0.301898  | conserved hypothetical protein                     |
| XP_009691016.1 | 0.0339754  | 0.346675   | 0.0980038    | 0.0402973  | 0.409971   | 0.098293     | 0.098148  | uncharacterized protein                            |
| XP_009691017.1 | 0.0400043  | 0.432261   | 0.0925467    | 0.0364293  | 0.372651   | 0.097757     | 0.095152  | aldo-keto reductase                                |

| protein_id     | Chitose_ka | Chitose_ks | Chitose_kaks | Buffeli_ka  | Buffeli_ks | Buffeli_kaks | mean_kaks | function                                        |
|----------------|------------|------------|--------------|-------------|------------|--------------|-----------|-------------------------------------------------|
| XP_009691018.1 | 0.0496784  | 0.602539   | 0.0824485    | 0.0548227   | 0.57942    | 0.0946164    | 0.088532  | conserved hypothetical protein                  |
| XP_009691019.1 | 0.0369618  | 0.69605    | 0.0531022    | 0.0326883   | 0.691132   | 0.0472967    | 0.050199  | CTD-like phosphatase                            |
| XP_009691020.1 | 0.0292962  | 0.554412   | 0.0528419    | 0.0251894   | 0.672113   | 0.0374779    | 0.04516   | serine/threonine protein phosphatase            |
| XP_009691022.1 | 0.0178532  | 0.238747   | 0.0747789    |             |            |              | 0.0747789 | uncharacterized protein                         |
| XP_009691023.1 | 0.0311946  | 0.180096   | 0.173211     | 0.04348     | 0.311094   | 0.139765     | 0.156488  | conserved hypothetical protein                  |
| XP_009691024.1 | 0.106597   | 0.463035   | 0.230213     | 0.0825789   | 0.431023   | 0.191588     | 0.2109    | conserved hypothetical protein                  |
| XP_009691025.1 | 0.00501399 | 0.348243   | 0.014398     | 0.00264999  | 0.629878   | 0.00420716   | 0.009303  | 40S ribosomal protein S8                        |
| XP_009691026.1 |            |            |              | 0.108106    | 0.769038   | 0.140573     | 0.140573  | conserved hypothetical protein                  |
| XP_009691027.1 | 0.0865761  | 0.797488   | 0.108561     | 0.0852322   | 0.913699   | 0.0932826    | 0.100922  | uncharacterized protein                         |
| XP_009691030.1 |            |            |              | 0.106393    | 0.497729   | 0.213757     | 0.213757  | conserved hypothetical protein                  |
| XP_009691031.1 | 0.0538029  | 0.615067   | 0.0874749    |             |            |              | 0.0874749 | ABC transporter                                 |
| XP_009691032.1 |            |            |              | 0.0870796   | 0.357273   | 0.243734     | 0.243734  | conserved hypothetical protein                  |
| XP_009691051.1 | 0.0811435  | 0.7086     | 0.114512     | 0.0844729   | 0.979671   | 0.0862258    | 0.100369  | uncharacterized protein                         |
| XP_009691052.1 | 0.0696696  | 0.757923   | 0.0919217    |             |            |              | 0.0919217 | conserved hypothetical protein                  |
| XP_009691053.1 | 0.132841   | 0.884184   | 0.150242     | 0.114638    | 0.794017   | 0.144377     | 0.147309  | uncharacterized protein                         |
| XP_009691055.1 | 0.132008   | 0.603674   | 0.218674     | 0.0846134   | 0.737085   | 0.114795     | 0.166735  | uncharacterized protein                         |
| XP_009691056.1 | 0.118667   | 0.768277   | 0.154459     | 0.15239     | 0.991339   | 0.153721     | 0.15409   | uncharacterized protein                         |
| XP_009691057.1 | 0.0578517  | 0.690208   | 0.0838178    | 0.0594354   | 0.656518   | 0.0905312    | 0.087175  | conserved hypothetical protein                  |
| XP_009691058.1 | 0.293715   | 0.125505   | 2.34027      | 0.365665    | 0.294328   | 1.24237      | 1.79132   | hypothetical protein                            |
| XP_009691059.1 | 0.109751   | 0.859503   | 0.127691     | 0.111342    | 0.828485   | 0.134392     | 0.131042  | uncharacterized protein                         |
| XP_009691060.1 | 0.00230364 | 0.536468   | 0.00429408   | 0.000683116 | 0.683116   | 0.001        | 0.002647  | 40S ribosomal protein S5                        |
| XP_009691061.1 | 0.0358191  | 0.285405   | 0.125503     | 0.0219397   | 0.317784   | 0.0690398    | 0.097271  | ADP-ribosylation factor                         |
| XP_009691062.1 | 0.0426593  | 0.478892   | 0.0890791    | 0.032766    | 0.513079   | 0.0638615    | 0.07647   | conserved hypothetical protein                  |
| XP_009691063.1 | 0.00903106 | 0.452529   | 0.0199569    | 0.0294053   | 0.423932   | 0.0693632    | 0.04466   | multiprotein bridging factor type 1             |
| XP_009691064.1 | 0.024853   | 0.321804   | 0.07723      | 0.0326981   | 0.272084   | 0.120177     | 0.098703  | farnesyl pyrophosphate synthetase               |
| XP_009691065.1 | 0.0951935  | 0.426696   | 0.223094     | 0.0935362   | 0.422112   | 0.221591     | 0.222342  | conserved hypothetical protein                  |
| XP_009691066.1 | 0.0340491  | 0.588859   | 0.0578222    | 0.0108464   | 0.116236   | 0.0933129    | 0.075568  | conserved hypothetical protein                  |
| XP_009691067.1 | 0.0550497  | 0.476687   | 0.115484     | 0.0405704   | 0.38037    | 0.10666      | 0.111072  | uncharacterised trophozoite protein             |
| XP_009691068.1 | 0.0228366  | 0.902829   | 0.0252945    | 0.016069    | 0.767277   | 0.0209429    | 0.023119  | vacuolar ATP synthase subunit E                 |
| XP_009691069.1 | 0.00271884 | 0.529923   | 0.00513062   | 0.00266968  | 0.537226   | 0.00496937   | 0.00505   | uncharacterized protein                         |
| XP_009691070.1 | 0.0979515  | 0.444922   | 0.220154     | 0.0893929   | 0.386111   | 0.231522     | 0.225838  | multicopy suppressor of ts gsp1                 |
| XP_009691071.1 | 0.0290878  | 0.262364   | 0.110868     |             |            |              | 0.110868  | uncharacterized protein                         |
| XP_009691072.1 | 0.0928279  | 0.656568   | 0.141384     | 0.0970235   | 0.891816   | 0.108793     | 0.125088  | conserved hypothetical protein                  |
| XP_009691074.1 | 0.0893215  | 0.690032   | 0.129446     | 0.0916157   | 0.60196    | 0.152196     | 0.140821  | conserved hypothetical protein                  |
| XP_009691075.1 | 0.0823029  | 0.652668   | 0.126102     | 0.0826629   | 0.819319   | 0.100892     | 0.113497  | uncharacterized protein                         |
| XP_009691076.1 | 0.0665788  | 0.318213   | 0.209227     | 0.0618045   | 0.368804   | 0.167581     | 0.188404  | uncharacterized protein                         |
| XP_009691077.1 | 0.0495778  | 0.594602   | 0.0833799    | 0.0450367   | 0.571235   | 0.0788409    | 0.08111   | GPI anchor transamidase                         |
| XP_009691078.1 | 0.0295734  | 0.136185   | 0.217156     | 0.0495677   | 0.296088   | 0.167408     | 0.192282  | conserved hypothetical protein                  |
| XP_009691079.1 | 0.0251661  | 0.179843   | 0.139934     |             |            |              | 0.139934  | nuclear transcription factor Y subunit B-8      |
| XP_009691081.1 | NA         | NA         | NA           |             |            |              | NA        | serine/threonine protein kinase                 |
| XP_009691082.1 | 0.0826726  | 0.863916   | 0.0956952    | 0.0651807   | 0.869612   | 0.0749538    | 0.085324  | uncharacterized protein                         |
| XP_009691083.1 | 0.0003554  | 0.3554     | 0.001        |             |            |              | 0.001     | uncharacterized protein                         |
| XP_009691084.1 | 0.0786521  | 0.247782   | 0.317424     | 0.061354    | 0.29136    | 0.210578     | 0.264001  | uncharacterized protein                         |
| XP_009691085.1 | 0.0380955  | 0.447822   | 0.0850683    | 0.0378372   | 0.452944   | 0.0835363    | 0.084302  | conserved hypothetical protein                  |
| XP_009691086.1 | 0.107784   | 0.532046   | 0.202584     | 0.0993157   | 0.44334    | 0.224017     | 0.213301  | conserved hypothetical protein                  |
| XP_009691087.1 | 0.0687467  | 0.346517   | 0.198393     | 0.0679477   | 0.364109   | 0.186614     | 0.192503  | integral membrane protein                       |
| XP_009691088.1 | 0.0899323  | 0.312935   | 0.287384     | 0.0869742   | 0.349668   | 0.248733     | 0.268058  | cytochrome c oxidase copper chaperone%2C Dopuin |
| XP_009691089.1 | 0.08895    | 0.763427   | 0.116514     | 0.104342    | 1.00768    | 0.103547     | 0.110031  | conserved hypothetical protein                  |
| XP_009691090.1 | 0.022776   | 0.417895   | 0.0545017    |             |            |              | 0.0545017 | conserved hypothetical protein                  |
| XP_009691092.1 | 0.0674331  | 0.316403   | 0.213124     | 0.037569    | 0.215411   | 0.174406     | 0.193765  | uncharacterized protein                         |
| XP_009691093.1 | 0.0305076  | 0.472751   | 0.0645321    | 0.0209067   | 0.392285   | 0.0532946    | 0.058913  | DEAD-box RNA helicase                           |
| XP_009691094.1 | 0.0403494  | 0.963062   | 0.041897     | 0.0372816   | 0.884813   | 0.0421349    | 0.042016  | transcription factor                            |
| XP_009691095.1 | 0.110374   | 0.431096   | 0.256032     | 0.0969385   | 0.345558   | 0.280528     | 0.26828   | conserved hypothetical protein                  |

| protein_id     | Chitose_ka  | Chitose_ks | Chitose_kaks | Buffeli_ka  | Buffeli_ks | Buffeli_kaks | mean_kaks | function                                                |
|----------------|-------------|------------|--------------|-------------|------------|--------------|-----------|---------------------------------------------------------|
| XP_009691096.1 | 0.0734399   | 0.852159   | 0.086181     | 0.0642648   | 0.781938   | 0.0821865    | 0.084184  | uncharacterized protein                                 |
| XP_009691097.1 | 0.0790306   | 0.727107   | 0.108692     | 0.045922    | 0.634048   | 0.0724267    | 0.090559  | conserved hypothetical protein                          |
| XP_009691098.1 | 0.077783    | 0.646833   | 0.120252     | 0.05344     | 0.504458   | 0.105935     | 0.113093  | histone deacetylase complex subunit Sap18-like protein  |
| XP_009691099.1 | 0.0348219   | 0.396217   | 0.0878859    | 0.0272165   | 0.371537   | 0.0732538    | 0.08057   | conserved hypothetical protein                          |
| XP_009691100.1 | 0.000516374 | 0.516374   | 0.001        | 0.000239025 | 0.239025   | 0.001        | 0.001     | Tgf beta-inducible nuclear protein 1                    |
| XP_009691101.1 | 0.0633162   | 0.363756   | 0.174062     | 0.0354926   | 0.277509   | 0.127897     | 0.150979  | uncharacterized protein                                 |
| XP_009691102.1 | 0.0364597   | 0.489919   | 0.0744198    | 0.0464547   | 0.494586   | 0.0939264    | 0.084173  | conserved hypothetical protein                          |
| XP_009691103.1 | 0.0274412   | 0.487209   | 0.0563233    | 0.0257342   | 0.470115   | 0.0547401    | 0.055532  | elongation factor g 1%2C mitochondrial                  |
| XP_009691104.1 | 0.0236497   | 0.29269    | 0.0808012    | 0.0177335   | 0.38028    | 0.0466327    | 0.063717  | conserved hypothetical protein                          |
| XP_009691105.1 | 0.00795223  | 0.385076   | 0.0206511    |             |            |              | 0.0206511 | hypothetical protein                                    |
| XP_009691106.1 | 0.102935    | 0.492727   | 0.208909     | 0.0959872   | 0.432615   | 0.221877     | 0.215393  | conserved hypothetical protein                          |
| XP_009691107.1 | 0.0680788   | 0.482043   | 0.14123      | 0.0675566   | 0.462889   | 0.145946     | 0.143588  | uncharacterized protein                                 |
| XP_009691108.1 | 0.00188991  | 0.20594    | 0.00917696   | 0.0103099   | 0.289839   | 0.0355711    | 0.022374  | proteasome subunit alpha type 2                         |
| XP_009691109.1 | 0.0217205   | 0.316453   | 0.0686372    | 0.00499652  | 0.398247   | 0.0125463    | 0.040592  | uncharacterized protein                                 |
| XP_009691110.1 | NA          | NA         | NA           | 0.0253836   | 0.308588   | 0.082257     | NA        | conserved hypothetical protein                          |
| XP_009691111.1 | 0.0379387   | 0.330896   | 0.114654     | 0.0443796   | 0.366904   | 0.120957     | 0.117806  | Plasmodium falciparum CPW-WPC repeat containing protein |
| XP_009691112.1 | 0.0397571   | 0.528422   | 0.0752373    | 0.0420881   | 0.465114   | 0.0904899    | 0.082864  | signal peptidase                                        |
| XP_009691113.1 | 0.0818761   | 0.418918   | 0.195447     | 0.056245    | 0.425992   | 0.132033     | 0.16374   | conserved hypothetical protein                          |
| XP_009691114.1 | 0.0293163   | 0.300231   | 0.0976457    | 0.045273    | 0.278066   | 0.162814     | 0.13023   | 4-hydroxybenzoate octaprenyltransferase                 |
| XP_009691115.1 | 0.0420921   | 0.337857   | 0.124586     | 0.0232732   | 0.234338   | 0.0993146    | 0.11195   | uncharacterized protein                                 |
| XP_009691116.1 | 0.0461848   | 0.389558   | 0.118557     | 0.0459583   | 0.373172   | 0.123156     | 0.120857  | conserved hypothetical protein                          |
| XP_009691117.1 | 0.0188521   | 0.389511   | 0.0483995    | 0.0281481   | 0.323238   | 0.0870817    | 0.067741  | uncharacterized protein                                 |
| XP_009691118.1 | 0.0871051   | 0.457709   | 0.190307     | 0.0849462   | 0.472186   | 0.1799       | 0.185104  | conserved hypothetical protein                          |
| XP_009691119.1 | 0.022917    | 0.217785   | 0.105228     | 0.0331516   | 0.308683   | 0.107397     | 0.106313  | uncharacterized protein                                 |
| XP_009691120.1 | 0.0523869   | 0.252244   | 0.207683     | 0.0279378   | 0.118463   | 0.235836     | 0.221759  | conserved hypothetical protein                          |
| XP_009691121.1 | 0.0721777   | 0.464211   | 0.155485     |             |            |              | 0.155485  | uncharacterized protein                                 |
| XP_009691122.1 | 0.0675011   | 0.430239   | 0.156892     | 0.0567025   | 0.396865   | 0.142876     | 0.149884  | uncharacterized protein                                 |
| XP_009691123.1 | 0.0685476   | 0.38308    | 0.178938     | 0.0724858   | 0.37645    | 0.192551     | 0.185745  | uncharacterized protein                                 |
| XP_009691124.1 | 0.0706146   | 0.531358   | 0.132895     | 0.0552727   | 0.51524    | 0.107276     | 0.120086  | uncharacterized protein                                 |
| XP_009691125.1 | 0.0456161   | 0.62748    | 0.0726972    | 0.0419905   | 0.54036    | 0.0777082    | 0.075203  | eukaryotic translation initiation factor 3 subunit 7    |
| XP_009691126.1 | 0.07689     | 0.720735   | 0.106683     | 0.0606545   | 0.49028    | 0.123714     | 0.115199  | conserved hypothetical protein                          |
| XP_009691127.1 | 0.0724517   | 0.485164   | 0.149334     | 0.0594995   | 0.451359   | 0.131823     | 0.140578  | conserved hypothetical protein                          |
| XP_009691128.1 | 0.0420918   | 0.615524   | 0.0683838    | 0.0421408   | 0.497605   | 0.0846872    | 0.076536  | conserved hypothetical protein                          |
| XP_009691129.1 | 0.0398014   | 0.34098    | 0.116726     | 0.0513157   | 0.305336   | 0.168063     | 0.142394  | conserved hypothetical protein                          |
| XP_009691130.1 | 0.061978    | 0.215012   | 0.288254     | 0.0574123   | 0.120073   | 0.478146     | 0.3832    | conserved hypothetical protein                          |
| XP_009691131.1 | 0.147954    | 0.348825   | 0.424151     | 0.130299    | 0.323981   | 0.402179     | 0.413165  | conserved hypothetical protein                          |
| XP_009691132.1 | 0.0207313   | 0.403883   | 0.05133      | 0.0159159   | 0.468015   | 0.0340074    | 0.042669  | conserved hypothetical protein                          |
| XP_009691133.1 | 0.0413563   | 0.315688   | 0.131003     | 0.0270362   | 0.323829   | 0.0834891    | 0.107246  | conserved hypothetical protein                          |
| XP_009691134.1 | 0.0488716   | 0.341506   | 0.143106     | 0.0392765   | 0.240808   | 0.163103     | 0.153105  | uncharacterized protein                                 |
| XP_009691135.1 | 0.00585951  | 0.355988   | 0.0164598    | 0.00389354  | 0.315184   | 0.0123532    | 0.014406  | Ras-related protein Rab-1                               |
| XP_009691136.1 | 0.0357897   | 0.366693   | 0.0976012    | 0.0131322   | 0.425424   | 0.0308684    | 0.064235  | ribosomal protein S9                                    |
| XP_009691137.1 | 0.0674107   | 0.667823   | 0.100941     | 0.0715074   | 0.659056   | 0.1085       | 0.10472   | adenylosuccinate lyase                                  |
| XP_009691138.1 | 0.0419205   | 0.455464   | 0.092039     | 0.0479839   | 0.433482   | 0.110694     | 0.101366  | conserved hypothetical protein                          |
| XP_009691139.1 | 0.0647565   | 0.33248    | 0.194768     | 0.0587504   | 0.328893   | 0.178631     | 0.1867    | uncharacterized protein                                 |
| XP_009691140.1 | 0.0125197   | 0.447836   | 0.027956     | 0.000390696 | 0.390696   | 0.001        | 0.014478  | conserved hypothetical protein                          |
| XP_009691141.1 | 0.0587462   | 0.442003   | 0.132909     | 0.0361376   | 0.276251   | 0.130815     | 0.131862  | conserved hypothetical protein                          |
| XP_009691145.1 | 0.00998895  | 0.132524   | 0.0753745    | 0.00684436  | 0.13965    | 0.049011     | 0.062193  | nucleoside diphosphate hydrolase                        |
| XP_009691146.1 | 0.0311019   | 0.570241   | 0.0545417    | 0.034181    | 0.700707   | 0.0487806    | 0.051661  | zinc transport protein                                  |
| XP_009691147.1 | 0.105094    | 0.40067    | 0.262295     | 0.052031    | 0.280935   | 0.185207     | 0.223751  | conserved hypothetical protein                          |
| XP_009691148.1 | 0.118362    | 0.629586   | 0.188        | 0.11449     | 0.603191   | 0.189807     | 0.188904  | conserved hypothetical protein                          |
| XP_009691149.1 | 0.0533967   | 0.557924   | 0.0957061    | 0.0371468   | 0.604911   | 0.0614087    | 0.078557  | conserved hypothetical protein                          |
| XP_009691150.1 | 0.0172959   | 0.527834   | 0.0327677    | 0.015007    | 0.529029   | 0.0283671    | 0.030567  | conserved hypothetical protein                          |
| XP_009691151.1 | 0.0954782   | 0.365695   | 0.261087     | 0.0837454   | 0.374218   | 0.223788     | 0.242438  | conserved hypothetical protein                          |



| protein_id     | Chitose_ka  | Chitose_ks | Chitose_kaks | Buffeli_ka  | Buffeli_ks  | Buffeli_kaks | mean_kaks | function                                             |
|----------------|-------------|------------|--------------|-------------|-------------|--------------|-----------|------------------------------------------------------|
| XP_009691152.1 | 0.0243691   | 0.560314   | 0.0434918    | 0.0212621   | 0.532216    | 0.0399502    | 0.041721  | uncharacterized protein                              |
| XP_009691153.1 | 0.0412583   | 0.224635   | 0.183668     |             |             |              | 0.183668  | uncharacterized protein                              |
| XP_009691154.1 | 0.00857511  | 0.562091   | 0.0152557    | 0.000568173 | 0.568173    | 0.001        | 0.008128  | 60S ribosomal protein L15                            |
| XP_009691155.1 | 0.105053    | 0.479086   | 0.219278     | 0.0967455   | 0.526217    | 0.183851     | 0.201564  | conserved hypothetical protein                       |
| XP_009691156.1 | 0.0291618   | 0.594285   | 0.0490704    | 0.0322966   | 0.55257     | 0.0584481    | 0.053759  | uncharacterized protein                              |
| XP_009691157.1 | 0.0579948   | 0.702691   | 0.0825324    | 0.0462207   | 0.615989    | 0.075035     | 0.078784  | uncharacterized protein                              |
| XP_009691158.1 | 0.070086    | 0.857447   | 0.081738     | 0.0616969   | 0.90054     | 0.068511     | 0.075125  | conserved hypothetical protein                       |
| XP_009691159.1 | 0.0337986   | 0.883338   | 0.0382624    | 0.0291584   | 0.843059    | 0.0345864    | 0.036424  | U5 small nuclear ribonucleoprotein-specific helicase |
| XP_009691161.1 | 0.0195119   | 0.919949   | 0.0212098    | 0.0149018   | 0.750041    | 0.019868     | 0.020539  | DNA-directed RNA polymerase III                      |
| XP_009691162.1 | 0.000468192 | 0.468192   | 0.001        | 0.000413237 | 0.413237    | 0.001        | 0.001     | 40S ribosomal protein S23                            |
| XP_009691163.1 | 0.0176219   | 0.549987   | 0.0320405    | 0.0147564   | 0.583186    | 0.0253031    | 0.028672  | 60S ribosomal protein L7                             |
| XP_009691164.1 | 0.0514541   | 0.532074   | 0.0967048    | 0.0393903   | 0.384762    | 0.102376     | 0.09954   | uncharacterized protein                              |
| XP_009691165.1 | 0.0322307   | 0.314914   | 0.102347     | 0.0313469   | 0.217109    | 0.144383     | 0.123365  | conserved hypothetical protein                       |
| XP_009691166.1 | 0.0713165   | 0.50596    | 0.140953     | 0.0642862   | 0.356342    | 0.180406     | 0.16068   | conserved hypothetical protein                       |
| XP_009691167.1 | 0.185941    | 0.0234537  | 7.928        | 0.015448    | 0.000308959 | 50           | 28.964    | hypothetical protein                                 |
| XP_009691168.1 | 0.0711561   | 0.400871   | 0.177504     | 0.0669349   | 0.33887     | 0.197524     | 0.187514  | conserved hypothetical protein                       |
| XP_009691169.1 | 0.0405869   | 0.766995   | 0.0529168    | 0.0442756   | 0.865768    | 0.0511402    | 0.052028  | uncharacterized protein                              |
| XP_009691171.1 | 0.0560585   | 0.519673   | 0.107873     | 0.0634204   | 0.436517    | 0.145287     | 0.12658   | uncharacterized protein                              |
| XP_009691172.1 | 0.000202056 | 0.202056   | 0.001        | 0.00005339  | 0.05339     | 0.001        | 0.001     | uncharacterized protein                              |
| XP_009691173.1 | 0.0366237   | 0.221022   | 0.165701     |             |             |              | 0.165701  | light induced protein like protein                   |
| XP_009691174.1 | 0.0552401   | 0.390953   | 0.141296     | 0.0646455   | 0.308806    | 0.20934      | 0.175318  | uncharacterized protein                              |
| XP_009691175.1 | 0.0785191   | 0.421063   | 0.186478     | 0.0532525   | 0.312499    | 0.170408     | 0.178443  | uncharacterized protein                              |
| XP_009691177.1 | 0.081303    | 0.464949   | 0.174864     | 0.0877187   | 0.367491    | 0.238696     | 0.20678   | conserved hypothetical protein                       |
| XP_009691178.1 | 0.0472974   | 0.759828   | 0.0622475    | 0.0387222   | 1.66917     | 0.0231985    | 0.042723  | conserved hypothetical protein                       |
| XP_009691179.1 | 0.0201857   | 0.654493   | 0.0308417    | 0.0166095   | 0.656832    | 0.0252872    | 0.028064  | FAD-dependent glycerol-3-phosphate dehydrogenase     |
| XP_009691181.1 | 0.0581283   | 0.392984   | 0.147915     | 0.042603    | 0.275477    | 0.154652     | 0.151284  | conserved hypothetical protein                       |
| XP_009691182.1 | 0.055221    | 0.363186   | 0.152046     | 0.0416901   | 0.216209    | 0.192823     | 0.172434  | conserved hypothetical protein                       |
| XP_009691183.1 | 0.0602054   | 0.450368   | 0.133681     |             |             |              | 0.133681  | conserved hypothetical protein                       |
| XP_009691184.1 | 0.0499884   | 0.35604    | 0.140401     | 0.0523571   | 0.352674    | 0.148457     | 0.144429  | conserved hypothetical protein                       |
| XP_009691185.1 |             |            |              | 0.00730671  | 0.265468    | 0.0275239    | 0.0275239 | peptide chain release factor 2                       |
| XP_009691186.1 | 0.200811    | 0.12767    | 1.57289      | 0.134272    | 0.0539376   | 2.4894       | 2.031145  | conserved hypothetical protein                       |
| XP_009691187.1 | 0.0209066   | 0.903497   | 0.0231397    | 0.0147501   | 0.615462    | 0.0239658    | 0.023553  | T-complex protein subunit beta                       |
| XP_009691188.1 | 0.0742637   | 1.06537    | 0.0697068    | 0.0753784   | 0.933774    | 0.0807244    | 0.075216  | conserved hypothetical protein                       |
| XP_009691189.1 | 0.131631    | 0.73452    | 0.179207     | 0.110122    | 0.641046    | 0.171784     | 0.175495  | conserved hypothetical protein                       |
| XP_009691190.1 | 0.198632    | 0.379926   | 0.522817     | 0.174829    | 0.354094    | 0.493735     | 0.508276  | exon junction complex protein                        |
| XP_009691191.1 | 0.116401    | 0.195687   | 0.594834     | 3.92624E-05 | 0.0392624   | 0.001        | 0.297917  | hypothetical protein                                 |
| XP_009691192.1 | 0.0181409   | 1.82924    | 0.00991719   | 0.0293172   | 1.59875     | 0.0183376    | 0.014127  | eukaryotic translation initiation factor 5           |
| XP_009691193.1 | 0.149147    | 0.167137   | 0.892364     | 0.133338    | 0.0854536   | 1.56036      | 1.226362  | hypothetical protein                                 |
| XP_009691194.1 | 0.00307604  | 0.514453   | 0.00597925   | 0.000426216 | 0.426216    | 0.001        | 0.00349   | 40S ribosomal protein S12                            |
| XP_009691195.1 | 0.00864934  | 0.421124   | 0.0205387    | 0.000334459 | 0.334459    | 0.001        | 0.010769  | 40S ribosomal protein S19                            |
| XP_009691196.1 | 0.010887    | 0.341111   | 0.0319161    | 0.0180707   | 0.37883     | 0.0477014    | 0.039809  | RabGDI protein                                       |
| XP_009691197.1 | 0.0806208   | 0.0875884  | 0.920451     | NA          | NA          | NA           | NA        | conserved hypothetical protein                       |
| XP_009691198.1 | 0.0759003   | 0.43103    | 0.17609      | 0.0371596   | 0.340238    | 0.109217     | 0.142653  | uncharacterized protein                              |
| XP_009691199.1 | 0.344988    | 0.00689975 | 50           | 0.278414    | 0.00556829  | 50           | 50        | hypothetical protein                                 |
| XP_009691200.1 | 0.0458242   | 0.212805   | 0.215334     | 0.0369225   | 0.190025    | 0.194303     | 0.204819  | conserved hypothetical protein                       |
| XP_009691201.1 | 0.0789134   | 0.242208   | 0.325809     | 0.0720981   | 0.313838    | 0.229731     | 0.27777   | protein farnesyltransferase subunit alpha            |
| XP_009691202.1 | 0.0802234   | 0.511243   | 0.156918     | 0.0706603   | 0.421142    | 0.167783     | 0.162351  | conserved hypothetical protein                       |
| XP_009691203.1 | 0.164049    | 0.229355   | 0.715264     | 0.0605494   | 0.0570691   | 1.06098      | 0.888122  | hypothetical protein                                 |
| XP_009691204.1 | 0.00031605  | 0.31605    | 0.001        | 0.000090518 | 0.090518    | 0.001        | 0.001     | 40S ribosomal protein S17                            |
| XP_009691205.1 | 0.0581525   | 0.312437   | 0.186125     | 0.0564878   | 0.531395    | 0.106301     | 0.146213  | uncharacterized protein                              |
| XP_009691206.1 | 0.0516575   | 0.284709   | 0.18144      |             |             |              | 0.18144   | uncharacterized protein                              |
| XP_009691207.1 | 0.0631918   | 0.370437   | 0.170587     | 0.0479994   | 0.361956    | 0.132611     | 0.151599  | conserved hypothetical protein                       |
| XP_009691208.1 | 0.00950732  | 0.502515   | 0.0189195    | 0.0086903   | 0.436815    | 0.0198947    | 0.019407  | uncharacterized protein                              |

| protein_id     | Chitose_ka  | Chitose_ks | Chitose_kaks | Buffeli_ka  | Buffeli_ks | Buffeli_kaks | mean_kaks | function                                           |
|----------------|-------------|------------|--------------|-------------|------------|--------------|-----------|----------------------------------------------------|
| XP_009691209.1 | 0.00717793  | 0.492794   | 0.0145658    | 0.00278745  | 0.502712   | 0.00554484   | 0.010055  | uncharacterized protein                            |
| XP_009691210.1 | 0.126875    | 0.301713   | 0.420515     |             |            |              | 0.420515  | conserved hypothetical protein                     |
| XP_009691212.1 | 0.0946624   | 0.677958   | 0.139629     | 0.0851154   | 0.795731   | 0.106965     | 0.123297  | conserved hypothetical protein                     |
| XP_009691213.1 | 0.00678819  | 0.677111   | 0.0100252    | 0.00969549  | 0.575853   | 0.0168367    | 0.013431  | 40S ribosomal protein S3a                          |
| XP_009691215.1 | 0.0170208   | 0.487616   | 0.0349062    | 0.0076761   | 0.548252   | 0.0140011    | 0.024454  | elongation factor tu                               |
| XP_009691216.1 | 0.0398309   | 0.276327   | 0.144144     |             |            |              | 0.144144  | protein kinase                                     |
| XP_009691217.1 | 0.0296571   | 0.332884   | 0.0890912    |             |            |              | 0.0890912 | uncharacterized protein                            |
| XP_009691218.1 |             |            |              | 0.000029903 | 0.029903   | 0.001        | 0.001     | uncharacterized protein                            |
| XP_009691219.1 | 0.108738    | 0.0277711  | 3.91549      | NA          | NA         | NA           | NA        | conserved hypothetical protein                     |
| XP_009691220.1 | 0.0543399   | 0.0010868  | 50           |             |            |              | 50        | BIR protein                                        |
| XP_009691221.1 | 0.0527043   | 0.230596   | 0.228557     | 0.0405764   | 0.180524   | 0.22477      | 0.226664  | conserved hypothetical protein                     |
| XP_009691222.1 | 0.0430324   | 0.644539   | 0.0666612    | 0.0256768   | 0.545135   | 0.0471018    | 0.056882  | uncharacterized protein                            |
| XP_009691223.1 | 0.0485202   | 0.547873   | 0.0885611    | 0.0286253   | 0.472292   | 0.0606094    | 0.074585  | DNA topoisomerase III                              |
| XP_009691224.1 | 0.0402995   | 0.577754   | 0.0697521    | 0.0486948   | 0.590855   | 0.0824142    | 0.076083  | RNA splicing factor                                |
| XP_009691225.1 | 0.0268155   | 0.557273   | 0.0481192    | 0.0381193   | 0.518906   | 0.0734609    | 0.06079   | conserved hypothetical protein                     |
| XP_009691226.1 | 0.0192193   | 0.397794   | 0.0483148    | 0.00346849  | 0.277463   | 0.0125007    | 0.030408  | conserved hypothetical protein                     |
| XP_009691227.1 | 0.0782685   | 0.67057    | 0.116719     | 0.0615017   | 0.50148    | 0.12264      | 0.119679  | uncharacterized protein                            |
| XP_009691228.1 | 0.0133832   | 0.403998   | 0.033127     |             |            |              | 0.033127  | vacuolar ATP synthase subunit G                    |
| XP_009691229.1 | 0.0123501   | 0.391878   | 0.0315151    | 0.00597915  | 0.488485   | 0.0122402    | 0.021878  | uncharacterized protein                            |
| XP_009691230.1 | 0.0458118   | 0.344451   | 0.133        | 0.0173629   | 0.307839   | 0.0564024    | 0.094701  | 60S ribosomal protein L25                          |
| XP_009691231.1 | 0.0684477   | 0.481851   | 0.142052     | 0.0950769   | 0.62522    | 0.15207      | 0.147061  | conserved hypothetical protein                     |
| XP_009691232.1 | 0.0677449   | 0.348629   | 0.194318     | 0.0462211   | 0.487131   | 0.0948843    | 0.144601  | conserved hypothetical protein                     |
| XP_009691233.1 | 0.0186254   | 0.481823   | 0.0386562    | 0.0247557   | 0.521544   | 0.0474662    | 0.043061  | integral membrane protein                          |
| XP_009691235.1 |             |            |              | 0.0996997   | 0.501928   | 0.198634     | 0.198634  | uncharacterized protein                            |
| XP_009691236.1 | 0.0672224   | 0.529426   | 0.126972     | 0.0254889   | 0.323781   | 0.0787226    | 0.102847  | aspartyl(acid) protease                            |
| XP_009691237.1 | 0.0730875   | 0.768611   | 0.0950904    | 0.0661877   | 0.836471   | 0.0791273    | 0.087109  | ubiquitin carboxyl-terminal hydrolase              |
| XP_009691238.1 | 0.0344729   | 0.45993    | 0.0749524    | 0.0429038   | 0.610937   | 0.0702262    | 0.072589  | 4-hydroxy-3-methylbut-2-enyl diphosphate reductase |
| XP_009691239.1 | 0.00840065  | 0.157      | 0.0535074    |             |            |              | 0.0535074 | conserved hypothetical protein                     |
| XP_009691240.1 | 0.0380539   | 0.515414   | 0.0738318    | 0.0290236   | 0.609566   | 0.0476136    | 0.060723  | ferredoxin reductase-like protein                  |
| XP_009691241.1 |             |            |              | 0.0485671   | 0.886897   | 0.0547607    | 0.0547607 | conserved hypothetical protein                     |
| XP_009691242.1 | 0.0502486   | 0.960755   | 0.0523012    | 0.042901    | 0.891853   | 0.0481032    | 0.050202  | conserved hypothetical protein                     |
| XP_009691243.1 | 0.0523337   | 1.09638    | 0.047733     | 0.0432861   | 0.985902   | 0.0439051    | 0.045819  | DEAD/DEAH-like helicase                            |
| XP_009691244.1 | 0.0108899   | 0.568507   | 0.0191553    | 0.0062295   | 0.491711   | 0.012669     | 0.015912  | Ras-related GTPase                                 |
| XP_009691245.1 | 0.0923418   | 0.676463   | 0.136507     | 0.114258    | 0.671211   | 0.170227     | 0.153367  | uncharacterized protein                            |
| XP_009691246.1 | 0.0805862   | 0.911032   | 0.088456     | 0.0788068   | 0.839145   | 0.0939132    | 0.091185  | conserved hypothetical protein                     |
| XP_009691247.1 | 0.0725738   | 0.532798   | 0.136213     | 0.0454602   | 0.347638   | 0.130769     | 0.133491  | uncharacterized protein                            |
| XP_009691248.1 | 0.0636797   | 0.900122   | 0.0707457    | 0.0596588   | 0.789825   | 0.0755342    | 0.07314   | conserved hypothetical protein                     |
| XP_009691249.1 | 0.0901962   | 0.355431   | 0.253766     | 0.105088    | 0.32054    | 0.327847     | 0.290806  | uncharacterized protein                            |
| XP_009691250.1 | 0.118246    | 0.656373   | 0.180151     | 0.103047    | 0.663768   | 0.155246     | 0.167699  | conserved hypothetical protein                     |
| XP_009691251.1 | 0.0475227   | 0.95729    | 0.0496429    | 0.0246531   | 0.66805    | 0.0369031    | 0.043273  | synaptic glycoprotein sc2                          |
| XP_009691252.1 | 0.0105844   | 0.277823   | 0.0380976    | 0.0056891   | 0.265739   | 0.0214086    | 0.029753  | uncharacterized protein                            |
| XP_009691254.1 | 0.0472867   | 0.383326   | 0.123359     |             |            |              | 0.123359  | regulator of nonsense transcripts-related protein  |
| XP_009691255.1 | 0.0511913   | 0.474507   | 0.107883     |             |            |              | 0.107883  | conserved hypothetical protein                     |
| XP_009691257.1 | 0.0523875   | 1.25727    | 0.0416675    | 0.0577744   | 1.31104    | 0.0440677    | 0.042868  | mRNA transport factor                              |
| XP_009691258.1 | 0.0833926   | 1.06723    | 0.0781392    | 0.0692435   | 1.07271    | 0.0645503    | 0.071345  | conserved hypothetical protein                     |
| XP_009691259.1 | 0.0706694   | 1.01807    | 0.0694149    | 0.0767983   | 1.10476    | 0.069516     | 0.069465  | conserved hypothetical protein                     |
| XP_009691261.1 | 0.0586056   | 0.979278   | 0.0598457    | 0.0517016   | 0.823747   | 0.0627639    | 0.061305  | conserved hypothetical protein                     |
| XP_009691262.1 | 0.000106163 | 0.106163   | 0.001        |             |            |              | 0.001     | centrin                                            |
| XP_009691263.1 | 0.0788277   | 0.831806   | 0.0947669    | 0.10509     | 0.820416   | 0.128093     | 0.11143   | conserved hypothetical protein                     |
| XP_009691264.1 | 0.0572899   | 0.310084   | 0.184756     |             |            |              | 0.184756  | conserved hypothetical protein                     |
| XP_009691267.1 | 0.0222227   | 1.12042    | 0.0198343    | 0.0134382   | 0.213185   | 0.0630357    | 0.041435  | 60S ribosomal protein L35a                         |
| XP_009691268.1 | 0.0241041   | 0.516099   | 0.0467044    | 0.0348916   | 0.526676   | 0.0662487    | 0.056477  | conserved hypothetical protein                     |
| XP_009691269.1 | 0.0690517   | 0.886544   | 0.0778886    | 0.0552034   | 0.587732   | 0.0939262    | 0.085907  | cobalamin synthesis protein                        |

| protein_id     | Chitose_ka  | Chitose_ks | Chitose_kaks | Buffeli_ka | Buffeli_ks | Buffeli_kaks | mean_kaks | function                                             |
|----------------|-------------|------------|--------------|------------|------------|--------------|-----------|------------------------------------------------------|
| XP_009691270.1 | 0.0403324   | 0.660041   | 0.0611059    |            |            |              | 0.0611059 | uncharacterized protein                              |
| XP_009691271.1 | 0.0709278   | 0.646921   | 0.109639     | 0.0480524  | 0.529766   | 0.090705     | 0.100172  | conserved hypothetical protein                       |
| XP_009691272.1 | 0.0580128   | 1.22321    | 0.0474267    | 0.062424   | 0.751531   | 0.0830625    | 0.065245  | conserved hypothetical protein                       |
| XP_009691273.1 | 0.0579474   | 0.651406   | 0.0579474    | 0.0513668  | 0.631991   | 0.0812777    | 0.085118  | conserved hypothetical protein                       |
| XP_009691274.1 | 0.0271308   | 0.483054   | 0.0561651    | 0.0227478  | 0.461131   | 0.0493305    | 0.052748  | uncharacterized protein                              |
| XP_009691275.1 | 0.0189326   | 0.594494   | 0.0318466    | 0.0170147  | 0.614065   | 0.0277082    | 0.029777  | methionine aminopeptidase                            |
| XP_009691276.1 | 0.0217327   | 0.465883   | 0.0466484    | 0.0195274  | 0.372611   | 0.0524068    | 0.049528  | uncharacterized protein                              |
| XP_009691277.1 | 0.0997412   | 0.74633    | 0.133642     | 0.0945371  | 0.679244   | 0.13918      | 0.136411  | uncharacterized protein                              |
| XP_009691278.1 | 0.110856    | 0.980177   | 0.113098     | 0.0826856  | 0.793235   | 0.104238     | 0.108668  | conserved hypothetical protein                       |
| XP_009691279.1 | 0.0389969   | 0.500888   | 0.0778554    | 0.0104991  | 0.467056   | 0.0224794    | 0.050167  | conserved hypothetical protein                       |
| XP_009691280.1 | 0.000025147 | 0.025147   | 0.001        | 0.0239632  | 0.0256963  | 0.932555     | 0.466778  | hypothetical protein                                 |
| XP_009691281.1 | 0.0251261   | 0.616575   | 0.0407511    | 0.0254465  | 0.451634   | 0.0563431    | 0.048547  | uncharacterized protein                              |
| XP_009691282.1 | 0.0832937   | 0.325276   | 0.256071     | 0.0821463  | 0.347695   | 0.236259     | 0.246165  | queuine tRNA-ribosyltransferase-like protein         |
| XP_009691283.1 | 0.0266903   | 0.503112   | 0.0530504    | 0.03548    | 0.376903   | 0.0941358    | 0.073593  | conserved hypothetical protein                       |
| XP_009691284.1 | 0.0396508   | 1.06828    | 0.0371165    | 0.0404813  | 1.02963    | 0.0393165    | 0.038217  | conserved hypothetical protein                       |
| XP_009691285.1 | 0.0890508   | 0.596237   | 0.149355     |            |            |              | 0.149355  | conserved hypothetical protein                       |
| XP_009691286.1 |             |            |              | 0.114348   | 0.981787   | 0.116469     | 0.116469  | conserved hypothetical protein                       |
| XP_009691287.1 | 0.0799226   | 0.927682   | 0.086153     | 0.067148   | 0.565627   | 0.118714     | 0.102433  | conserved hypothetical protein                       |
| XP_009691288.1 | 0.0301747   | 0.493974   | 0.0610856    | 0.0185332  | 0.483909   | 0.0382989    | 0.049692  | GTP-binding protein                                  |
| XP_009691289.1 | 0.0176022   | 0.880755   | 0.0199854    | 0.016488   | 0.67966    | 0.0242591    | 0.022122  | protein CWC15 homolog                                |
| XP_009691290.1 | 0.0210789   | 0.440095   | 0.0478962    | 0.013254   | 0.329297   | 0.0402494    | 0.044073  | uncharacterized protein                              |
| XP_009691291.1 | 0.0420628   | 0.47546    | 0.0884674    | 0.0463221  | 0.38229    | 0.12117      | 0.104819  | hypothetical protein                                 |
| XP_009691292.1 | 0.0311554   | 0.512024   | 0.0608475    | 0.0326409  | 0.488251   | 0.0668528    | 0.06385   | uncharacterized protein                              |
| XP_009691293.1 | 0.0510448   | 0.588099   | 0.0867962    | 0.0381284  | 0.595928   | 0.0639814    | 0.075389  | uncharacterized protein                              |
| XP_009691294.1 | 0.0869708   | 0.360021   | 0.241571     | 0.0998465  | 0.570998   | 0.174863     | 0.208217  | hypothetical protein                                 |
| XP_009691295.1 | 0.0797652   | 0.54208    | 0.147147     | 0.073913   | 0.575604   | 0.128409     | 0.137778  | hypothetical protein                                 |
| XP_009691296.1 | 0.037866    | 0.423103   | 0.089496     | 0.0228639  | 0.38576    | 0.0592697    | 0.074383  | integral membrane protein                            |
| XP_009691297.1 | 0.0155973   | 0.399395   | 0.0390522    | 0.0387556  | 0.16361    | 0.236879     | 0.137966  | cold shock protein                                   |
| XP_009691298.1 | 0.016852    | 0.588161   | 0.0286521    | 0.0081828  | 0.562888   | 0.0145372    | 0.021595  | ATP synthase subunit alpha                           |
| XP_009691299.1 | 0.00472521  | 0.737067   | 0.00641083   | NA         | NA         | NA           | NA        | conserved hypothetical protein                       |
| XP_009691300.1 | 0.0268717   | 0.752633   | 0.0357036    | 0.0242444  | 0.574848   | 0.0421754    | 0.03894   | uncharacterized protein                              |
| XP_009691301.1 | 0.000327265 | 0.327265   | 0.001        | 0.00888143 | 0.357974   | 0.0248103    | 0.012905  | ribosomal protein S30                                |
| XP_009691302.1 | 0.110508    | 0.538192   | 0.205332     | 0.0768709  | 0.352545   | 0.218046     | 0.211689  | conserved hypothetical protein                       |
| XP_009691303.1 | 0.0600925   | 0.918061   | 0.0654559    | 0.0511736  | 0.509351   | 0.100468     | 0.082962  | uncharacterized protein                              |
| XP_009691304.1 | 0.0194234   | 0.183904   | 0.105617     | 0.0168993  | 0.17134    | 0.0986303    | 0.102124  | conserved hypothetical protein                       |
| XP_009691305.1 | 0.0062756   | 0.228364   | 0.0274807    | 0.0125653  | 0.30146    | 0.0416815    | 0.034581  | hypothetical protein                                 |
| XP_009691306.1 | 0.0523902   | 0.443313   | 0.118179     | 0.050372   | 0.459887   | 0.109531     | 0.113855  | uncharacterized protein                              |
| XP_009691307.1 | 0.0160424   | 0.474293   | 0.0338238    | 0.0202871  | 0.334978   | 0.0605626    | 0.047193  | uncharacterized protein                              |
| XP_009691308.1 | 0.13113     | 0.644701   | 0.203397     | 0.161928   | 0.677101   | 0.23915      | 0.221274  | hypothetical protein                                 |
| XP_009691309.1 | 0.070152    | 0.73989    | 0.0948141    | 0.0727478  | 0.329467   | 0.220804     | 0.0127809 | conserved hypothetical protein                       |
| XP_009691310.1 | 0.0619725   | 0.587579   | 0.105471     | 0.0781093  | 0.800843   | 0.0975339    | 0.101502  | ribosome biogenesis protein                          |
| XP_009691311.1 | 0.0669677   | 0.734496   | 0.091175     | 0.0482805  | 0.620301   | 0.0778339    | 0.084504  | conserved hypothetical protein                       |
| XP_009691312.1 | 0.0883092   | 0.341908   | 0.258283     | 0.0952533  | 0.258811   | 0.368042     | 0.313163  | SOH1-like protein                                    |
| XP_009691313.1 | 5.26216E-05 | 0.0526216  | 0.001        |            |            |              | 0.001     | ubiquitin-like protein                               |
| XP_009691314.1 | 0.0333933   | 0.684025   | 0.0488188    | 0.0480541  | 0.698855   | 0.0687613    | 0.05879   | uncharacterized protein                              |
| XP_009691315.1 | 0.0559552   | 0.856559   | 0.0653255    | 0.039571   | 0.679101   | 0.0582698    | 0.061798  | conserved hypothetical protein                       |
| XP_009691316.1 | 0.066762    | 0.903925   | 0.0738579    | 0.0588179  | 0.932343   | 0.0630861    | 0.068472  | molecular chaperone DnaJ                             |
| XP_009691317.1 | 0.0489765   | 0.420348   | 0.116514     | 0.0441744  | 0.497975   | 0.0887081    | 0.102611  | conserved hypothetical protein                       |
| XP_009691318.1 | 0.016608    | 0.341609   | 0.048617     | 0.0346641  | 0.314133   | 0.110349     | 0.079483  | ribose 5-phosphate epimerase                         |
| XP_009691319.1 | 0.029154    | 0.530581   | 0.0549473    |            |            |              | 0.0549473 | conserved hypothetical protein                       |
| XP_009691320.1 | 0.0522335   | 0.788124   | 0.0662757    | 0.058979   | 0.757091   | 0.0779022    | 0.072089  | conserved hypothetical protein                       |
| XP_009691321.1 | 0.0648179   | 0.568514   | 0.114013     |            |            |              | 0.114013  | calyculin binding protein-like                       |
| XP_009691322.1 | 0.043533    | 0.635137   | 0.0685412    | 0.11406    | 0.682047   | 0.167232     | 0.117887  | nicotinate-nucleotide adenyltransferase-like protein |

| protein_id     | Chitose_ka | Chitose_ks | Chitose_kaks | Buffeli_ka | Buffeli_ks | Buffeli_kaks | mean_kaks | function                                         |
|----------------|------------|------------|--------------|------------|------------|--------------|-----------|--------------------------------------------------|
| XP_009691323.1 | 0.123833   | 0.349276   | 0.354541     | 0.146679   | 0.674246   | 0.217546     | 0.286044  | conserved hypothetical protein                   |
| XP_009691324.1 | 0.159969   | 0.59878    | 0.267159     | 0.193856   | 0.514312   | 0.376923     | 0.322041  | conserved hypothetical protein                   |
| XP_009691325.1 | 0.0839205  | 0.78265    | 0.107226     | 0.0808435  | 0.508664   | 0.158933     | 0.133079  | conserved hypothetical protein                   |
| XP_009691326.1 | 0.110525   | 0.434787   | 0.254204     |            |            |              | 0.254204  | conserved hypothetical protein                   |
| XP_009691327.1 | 0.199543   | 0.610961   | 0.326605     | 0.206514   | 0.590767   | 0.34957      | 0.338087  | conserved hypothetical protein                   |
| XP_009691328.1 | 0.119156   | 0.63463    | 0.187756     | 0.109276   | 0.733799   | 0.148919     | 0.168338  | conserved hypothetical protein                   |
| XP_009691329.1 | 0.13276    | 0.54508    | 0.24356      | 0.112404   | 0.411423   | 0.273208     | 0.258384  | conserved hypothetical protein                   |
| XP_009691330.1 | 0.0320281  | 0.750965   | 0.0426493    | 0.0265665  | 0.579761   | 0.0458232    | 0.044236  | uncharacterized protein                          |
| XP_009691331.1 | 0.0626555  | 0.517162   | 0.121153     | 0.0711056  | 0.446523   | 0.159243     | 0.140198  | conserved hypothetical protein                   |
| XP_009691332.1 | 0.0737034  | 0.357744   | 0.206022     | 0.0330129  | 0.303029   | 0.108943     | 0.157482  | conserved hypothetical protein                   |
| XP_009691333.1 | 0.030778   | 0.842995   | 0.0365103    | 0.0127331  | 0.6133     | 0.0207616    | 0.028636  | uncharacterized protein                          |
| XP_009691334.1 | 0.0581234  | 0.562692   | 0.103295     | 0.0585409  | 0.430201   | 0.136078     | 0.119687  | uncharacterized protein                          |
| XP_009691335.1 | 0.0506903  | 0.516724   | 0.0980995    | 0.0541334  | 0.512447   | 0.105637     | 0.101868  | predicted protein                                |
| XP_009691336.1 | 0.0391101  | 0.491914   | 0.0795059    | 0.0293095  | 0.678773   | 0.0431801    | 0.061343  | geranylgeranyltransferase subunit beta           |
| XP_009691337.1 | 0.110852   | 0.44254    | 0.250491     | 0.0649223  | 0.363827   | 0.178443     | 0.214467  | conserved hypothetical protein                   |
| XP_009691338.1 | 0.0387165  | 0.448347   | 0.0863537    | 0.0263259  | 0.432757   | 0.0608331    | 0.073593  | uncharacterized protein                          |
| XP_009691339.1 | 0.0181467  | 0.224473   | 0.0808411    | 0.0156662  | 0.328008   | 0.0477617    | 0.064301  | uncharacterized protein                          |
| XP_009691340.1 | 0.105316   | 0.26979    | 0.390363     | 0.0777404  | 0.297265   | 0.261519     | 0.325941  | conserved hypothetical protein                   |
| XP_009691341.1 | 0.0383332  | 0.511452   | 0.0749496    | 0.0318656  | 0.49876    | 0.0638897    | 0.06942   | uncharacterized protein                          |
| XP_009691342.1 | 0.0426088  | 0.549281   | 0.0775719    | 0.024203   | 0.58011    | 0.0417214    | 0.059647  | tRNA nucleotidyltransferase                      |
| XP_009691343.1 | 0.0546498  | 0.541705   | 0.100885     | 0.0421846  | 0.591447   | 0.0713244    | 0.086105  | tRNA nucleotidyltransferase                      |
| XP_009691344.1 | 0.020327   | 0.408703   | 0.0497353    |            |            |              | 0.0497353 | conserved hypothetical protein                   |
| XP_009691345.1 | 0.0847719  | 0.435102   | 0.194832     | 0.0582497  | 0.709404   | 0.0821108    | 0.138471  | conserved hypothetical protein                   |
| XP_009691346.1 | 0.114724   | 0.474856   | 0.241597     | 0.122377   | 0.476082   | 0.257049     | 0.249323  | palmitoyltransferase                             |
| XP_009691347.1 | 0.0154727  | 0.589951   | 0.0262271    | 0.0103188  | 0.439096   | 0.0235001    | 0.024864  | CGMP-dependent protein kinase                    |
| XP_009691348.1 | 0.0232831  | 0.456586   | 0.0509939    | 0.0260341  | 0.472699   | 0.0550756    | 0.053035  | acid phosphatase                                 |
| XP_009691349.1 | 0.0245402  | 0.29754    | 0.0824768    | 0.0523414  | 0.418052   | 0.125203     | 0.10384   | zinc transport protein                           |
| XP_009691350.1 | 0.0174421  | 0.309897   | 0.0562836    | 0.0159436  | 0.24236    | 0.065785     | 0.061034  | 50S ribosomal protein L3                         |
| XP_009691351.1 | 0.0164738  | 0.201292   | 0.0818402    |            |            |              | 0.0818402 | DAZ-associated protein 1                         |
| XP_009691353.1 | 0.0470847  | 0.527146   | 0.08932      | 0.0393754  | 0.346709   | 0.113569     | 0.101444  | conserved hypothetical protein                   |
| XP_009691354.1 | 0.114668   | 0.522786   | 0.21934      | 0.111522   | 0.477035   | 0.233782     | 0.226561  | conserved hypothetical protein                   |
| XP_009691355.1 | 0.0590501  | 0.602828   | 0.0979551    | 0.0493012  | 0.586778   | 0.0840202    | 0.090988  | uncharacterized protein                          |
| XP_009691356.1 | 0.0420734  | 0.718077   | 0.0585917    | 0.0329209  | 0.689709   | 0.0477316    | 0.053162  | conserved hypothetical protein                   |
| XP_009691357.1 | 0.0469212  | 0.242701   | 0.193329     | 0.0502163  | 0.214458   | 0.234155     | 0.213742  | conserved hypothetical protein                   |
| XP_009691358.1 | 0.0465551  | 0.270882   | 0.171865     | 0.0363811  | 0.257291   | 0.141401     | 0.156633  | uncharacterized protein                          |
| XP_009691359.1 | 0.0914449  | 0.251191   | 0.364046     | 0.108519   | 0.253881   | 0.427442     | 0.395744  | conserved hypothetical protein                   |
| XP_009691361.1 | 0.0714075  | 0.829715   | 0.0860628    | 0.0581586  | 0.96276    | 0.0604082    | 0.073235  | conserved hypothetical protein                   |
| XP_009691363.1 | 0.0381096  | 0.439711   | 0.0866696    | 0.0474901  | 0.280018   | 0.169596     | 0.128133  | uncharacterized protein                          |
| XP_009691364.1 | 0.0203441  | 0.869161   | 0.0234066    | 0.0187093  | 0.894862   | 0.0209075    | 0.022157  | ribonucleoside-diphosphate reductase large chain |
| XP_009691365.1 | 0.0689377  | 0.563809   | 0.122271     | 0.0594144  | 0.434681   | 0.136685     | 0.129478  | ATP-dependent Clp protease proteolytic subunit   |
| XP_009691366.1 | 0.01472    | 0.250322   | 0.0588041    |            |            |              | 0.0588041 | bis-(5'-nucleosyl)-[tri- or tetra-] phosphatase  |
| XP_009691367.1 | 0.0343772  | 0.640885   | 0.0536402    | 0.0263518  | 0.626224   | 0.0420804    | 0.04786   | chromosome condensation protein                  |
| XP_009691368.1 | 0.0150895  | 0.58791    | 0.0256663    | 0.0109535  | 0.605861   | 0.0180792    | 0.021873  | glucose-6-phosphate/phosphate translocator       |
| XP_009691369.1 | 0.0309475  | 0.587702   | 0.0526585    | 0.00826617 | 0.550306   | 0.0150211    | 0.03384   | conserved hypothetical protein                   |
| XP_009691370.1 | 0.0812386  | 0.871974   | 0.0931663    | 0.0731918  | 0.761004   | 0.096178     | 0.094672  | serine/threonine-protein kinase ripk4            |
| XP_009691371.1 | 0.0317993  | 0.704699   | 0.0451247    | 0.0289556  | 0.646026   | 0.0448212    | 0.044973  | NADH dehydrogenase                               |
| XP_009691372.1 | 0.00523061 | 0.568472   | 0.00920118   | 0.00888604 | 0.324163   | 0.0274123    | 0.018307  | ubiquitin carrier protein                        |
| XP_009691373.1 | 0.101831   | 0.487163   | 0.209028     | 0.0798897  | 0.503964   | 0.158523     | 0.183775  | major facilitator superfamily MFS-1 protein      |
| XP_009691374.1 | 0.0144503  | 0.615624   | 0.0234726    | 0.00736202 | 0.4958     | 0.0148488    | 0.019161  | uncharacterized protein                          |
| XP_009691375.1 | 0.0519833  | 0.570524   | 0.091115     | 0.0412765  | 0.708022   | 0.0582984    | 0.074707  | major facilitator superfamily MFS-1 protein      |
| XP_009691376.1 | 0.0641064  | 0.778936   | 0.0823       | 0.054714   | 0.694419   | 0.0787911    | 0.080546  | major facilitator superfamily MFS-1 protein      |
| XP_009691377.1 | 0.115575   | 0.735736   | 0.157088     | 0.0926135  | 0.660327   | 0.140254     | 0.148671  | conserved hypothetical protein                   |
| XP_009691378.1 | 0.0502356  | 0.287559   | 0.174697     | 0.0576923  | 0.48257    | 0.119552     | 0.147124  | uncharacterized protein                          |

| protein_id     | Chitose_ka  | Chitose_ks | Chitose_kaks | Buffeli_ka  | Buffeli_ks | Buffeli_kaks | mean_kaks | function                                                                      |
|----------------|-------------|------------|--------------|-------------|------------|--------------|-----------|-------------------------------------------------------------------------------|
| XP_009691379.1 | 0.0417193   | 0.507142   | 0.0822636    | 0.0434437   | 0.707106   | 0.0614387    | 0.071851  | uncharacterized protein                                                       |
| XP_009691380.1 | 0.0233518   | 0.594163   | 0.039302     | 0.0267291   | 0.496742   | 0.0538088    | 0.046555  | DNA ligase 1 precursor                                                        |
| XP_009691381.1 | 0.0369111   | 0.427434   | 0.086355     | 0.0231944   | 0.417603   | 0.0555419    | 0.070948  | conserved hypothetical protein                                                |
| XP_009691382.1 | 0.106686    | 0.320217   | 0.333169     | 0.0967278   | 0.256079   | 0.377726     | 0.355448  | conserved hypothetical protein                                                |
| XP_009691383.1 | 0.121659    | 0.487694   | 0.249457     | 0.115951    | 0.436329   | 0.265743     | 0.2576    | conserved hypothetical protein                                                |
| XP_009691384.1 | 0.1729      | 0.556018   | 0.310961     | 0.126624    | 0.484705   | 0.26124      | 0.2861    | conserved hypothetical protein                                                |
| XP_009691385.1 | 0.0931869   | 0.614828   | 0.151566     | 0.0888143   | 0.633175   | 0.140268     | 0.145917  | conserved hypothetical protein                                                |
| XP_009691386.1 | 0.0976201   | 0.478519   | 0.204005     | 0.0934046   | 0.390426   | 0.239237     | 0.221621  | conserved hypothetical protein                                                |
| XP_009691387.1 | 0.0227801   | 0.777819   | 0.0292871    | 0.0233846   | 1.16078    | 0.0201456    | 0.024716  | glucose-6-phosphate-1-dehydrogenase                                           |
| XP_009691388.1 | 3.17509E-05 | 0.0317509  | 0.001        | 0.0197353   | 0.311171   | 0.0634227    | 0.032211  | hypothetical protein                                                          |
| XP_009691389.1 | 0.0714435   | 0.343212   | 0.208161     | 0.0770298   | 0.369401   | 0.208527     | 0.208344  | uncharacterized protein                                                       |
| XP_009691390.1 | 0.0354993   | 0.735138   | 0.0482892    | 0.0193837   | 0.50769    | 0.0381803    | 0.043235  | cleavage and polyadenylation specificity factor subunit                       |
| XP_009691391.1 | 0.0474136   | 0.456694   | 0.103819     | 0.0441645   | 0.463057   | 0.095376     | 0.099598  | cleavage and polyadenylation specificity factor subunit                       |
| XP_009691392.1 | 0.0787022   | 1.0452     | 0.0752985    | 0.0741162   | 0.888018   | 0.0834625    | 0.07938   | uncharacterized protein                                                       |
| XP_009691393.1 | 0.113639    | 0.340031   | 0.334202     | 0.0861106   | 0.286339   | 0.30073      | 0.317466  | hypothetical protein                                                          |
| XP_009691394.1 | 0.0788394   | 0.536926   | 0.146835     | 0.0716862   | 0.56609    | 0.126634     | 0.136734  | conserved hypothetical protein                                                |
| XP_009691395.1 | 0.0830424   | 0.504225   | 0.164693     | 0.0914709   | 0.448071   | 0.204144     | 0.184418  | nucleolar protein                                                             |
| XP_009691396.1 | 0.0943433   | 0.166815   | 0.565556     | 0.0634004   | 0.0616014  | 1.0292       | 0.797378  | conserved hypothetical protein                                                |
| XP_009691397.1 | 0.0459079   | 1.11085    | 0.0413267    | 0.0367588   | 0.964708   | 0.0381035    | 0.039715  | uncharacterized protein                                                       |
| XP_009691398.1 | 0.0820073   | 0.374727   | 0.218845     | 0.0617853   | 0.329328   | 0.18761      | 0.203228  | DNA mismatch repair protein                                                   |
| XP_009691399.1 | 0.0188115   | 0.638146   | 0.0294784    | 0.0158904   | 0.529339   | 0.0300192    | 0.029749  | cell division cycle CDC48 homologue/transitional endoplasmic reticulum ATPase |
| XP_009691400.1 | 0.0122982   | 0.489099   | 0.0251447    | 0.0184619   | 0.533274   | 0.03462      | 0.029882  | aspartyl-tRNA synthetase                                                      |
| XP_009691401.1 | 0.0247232   | 0.234699   | 0.10534      | 0.00313694  | 0.106597   | 0.029428     | 0.067384  | 60S ribosomal protein L34                                                     |
| XP_009691402.1 | 0.0735791   | 0.335743   | 0.219153     | 0.0370429   | 0.268655   | 0.137883     | 0.178518  | conserved hypothetical protein                                                |
| XP_009691403.1 | 0.0768411   | 0.342016   | 0.224671     | 0.117889    | 0.238434   | 0.494428     | 0.359549  | hypothetical protein                                                          |
| XP_009691404.1 | 0.023879    | 0.703532   | 0.0339416    | 0.033834    | 0.483921   | 0.0699164    | 0.051929  | hypothetical protein                                                          |
| XP_009691405.1 |             |            |              | 4.51343E-05 | 0.0451343  | 0.001        | 0.001     | hypothetical protein                                                          |
| XP_009691406.1 | 0.0937731   | 0.720408   | 0.130167     | 0.0672897   | 0.723183   | 0.0930465    | 0.111607  | conserved hypothetical protein                                                |
| XP_009691407.1 | 0.0354919   | 0.46562    | 0.076225     | 0.0337455   | 0.347699   | 0.0970538    | 0.086639  | conserved hypothetical protein                                                |
| XP_009691408.1 | 0.0493241   | 0.282784   | 0.174423     | 0.0187813   | 0.383342   | 0.0489936    | 0.111708  | uncharacterized protein                                                       |
| XP_009691409.1 | 0.0308368   | 0.83892    | 0.0367577    | 0.0310535   | 0.953489   | 0.0325683    | 0.034663  | clathrin heavy chain                                                          |
| XP_009691410.1 | 0.0415978   | 0.707166   | 0.0588233    | 0.0354175   | 0.635072   | 0.0557693    | 0.057296  | P-type ATPase 2                                                               |
| XP_009691411.1 | 0.0425566   | 0.613128   | 0.069409     | 0.033367    | 0.599423   | 0.0556652    | 0.062537  | DEAD-box family RNA helicase                                                  |
| XP_009691412.1 | 0.125941    | 0.290547   | 0.43346      | 0.078753    | 0.326482   | 0.241217     | 0.337338  | conserved hypothetical protein                                                |
| XP_009691413.1 | 0.0295101   | 0.374847   | 0.0787256    | 0.0214584   | 0.420446   | 0.0510372    | 0.064881  | uncharacterized protein                                                       |
| XP_009691414.1 | 0.108316    | 0.468964   | 0.230969     | 0.114388    | 0.516804   | 0.221337     | 0.226153  | uncharacterized protein                                                       |
| XP_009691415.1 | 0.0512615   | 0.447204   | 0.114627     | 0.0513749   | 0.488196   | 0.105234     | 0.109931  | uncharacterized protein                                                       |
| XP_009691416.1 | 0.0941043   | 0.396243   | 0.237491     | 0.0417882   | 0.49063    | 0.0851726    | 0.161332  | hypothetical protein                                                          |
| XP_009691417.1 | 0.0353572   | 0.539077   | 0.0655885    | 0.0204122   | 0.441505   | 0.0462332    | 0.055911  | origin recognition complex protein 1                                          |
| XP_009691418.1 | NA          | NA         | NA           | NA          | NA         | NA           | NA        | hypothetical protein                                                          |
| XP_009691419.1 | 0.0178826   | 0.180347   | 0.0991564    | 0.0170529   | 0.161064   | 0.105877     | 0.102517  | high-mobility-group protein                                                   |
| XP_009691420.1 | 0.0270467   | 0.218466   | 0.123803     | 0.0206424   | 0.510052   | 0.0404712    | 0.082137  | conserved hypothetical protein                                                |
| XP_009691421.1 | 0.0372605   | 0.636407   | 0.0585482    | 0.0462709   | 0.641333   | 0.0721481    | 0.065348  | uncharacterized protein                                                       |
| XP_009691422.1 | 0.0792329   | 0.92335    | 0.0858102    | 0.0661846   | 0.920203   | 0.0719239    | 0.078867  | conserved hypothetical protein                                                |
| XP_009691423.1 | 0.0571923   | 1.15981    | 0.0493117    | 0.0565576   | 0.994802   | 0.0568531    | 0.053082  | uncharacterized protein                                                       |
| XP_009691424.1 | 0.0258621   | 0.494864   | 0.052261     |             |            |              | 0.052261  | conserved hypothetical protein                                                |
| XP_009691426.1 | 0.0311779   | 1.08966    | 0.0286124    | 0.0233634   | 1.34741    | 0.0173395    | 0.022976  | adenosine monophosphate deaminase 2 (isoform L) isoform 3                     |
| XP_009691427.1 | 0.126218    | 0.35999    | 0.350616     | 0.179425    | 0.91782    | 0.19549      | 0.273053  | conserved hypothetical protein                                                |
| XP_009691428.1 | 0.106604    | 0.477257   | 0.223368     | 0.0982471   | 0.517047   | 0.190016     | 0.206692  | conserved hypothetical protein                                                |
| XP_009691429.1 | 0.0589837   | 0.645783   | 0.0913368    | 0.05259     | 0.531843   | 0.0988825    | 0.09511   | conserved hypothetical protein                                                |
| XP_009691430.1 | 0.0455959   | 0.488515   | 0.0933357    | 0.0336431   | 0.501481   | 0.0670874    | 0.080212  | methionine aminopeptidase                                                     |
| XP_009691431.1 | 0.0661999   | 0.702706   | 0.0942072    | 0.0646384   | 0.586417   | 0.110226     | 0.102217  | uncharacterized protein                                                       |
| XP_009691432.1 | 0.0776233   | 0.220842   | 0.351488     | 0.136651    | 0.231075   | 0.591369     | 0.471429  | hypothetical protein                                                          |

| protein_id     | Chitose_ka  | Chitose_ks | Chitose_kaks | Buffeli_ka  | Buffeli_ks | Buffeli_kaks | mean_kaks | function                                                           |
|----------------|-------------|------------|--------------|-------------|------------|--------------|-----------|--------------------------------------------------------------------|
| XP_009691433.1 | 0.01984     | 0.522544   | 0.037968     | 0.022414    | 0.555458   | 0.0403523    | 0.03916   | conserved hypothetical protein                                     |
| XP_009691434.1 | 0.0809474   | 0.362449   | 0.223335     | 0.08256     | 0.413901   | 0.199468     | 0.211402  | conserved hypothetical protein                                     |
| XP_009691435.1 | 0.0227749   | 0.406341   | 0.0560488    | 0.0256441   | 0.199675   | 0.128429     | 0.092239  | conserved hypothetical protein                                     |
| XP_009691436.1 | 0.0311486   | 0.126368   | 0.246491     | 0.0470024   | 0.259126   | 0.181388     | 0.21394   | deaminase                                                          |
| XP_009691437.1 | 0.0522333   | 0.41067    | 0.127191     | 0.040599    | 0.403114   | 0.100714     | 0.113952  | conserved hypothetical protein                                     |
| XP_009691438.1 |             |            |              | NA          | NA         | NA           | NA        | hypothetical protein                                               |
| XP_009691439.1 | 0.0493242   | 0.484699   | 0.101763     | 0.0468121   | 0.622355   | 0.0752177    | 0.08849   | cactin                                                             |
| XP_009691440.1 | 0.0380453   | 0.518194   | 0.073419     | 0.0419664   | 0.522434   | 0.0803285    | 0.076874  | uncharacterized protein                                            |
| XP_009691441.1 | 0.0550807   | 0.918418   | 0.0599734    | 0.0340609   | 0.718542   | 0.0474028    | 0.053688  | homeodomain-like containing protein                                |
| XP_009691442.1 | 0.0587593   | 0.522377   | 0.112484     | 0.0657513   | 0.620583   | 0.105951     | 0.109217  | uncharacterized protein                                            |
| XP_009691443.1 | 0.0976049   | 0.376459   | 0.259271     | 0.092757    | 0.411444   | 0.225442     | 0.242356  | conserved hypothetical protein                                     |
| XP_009691444.1 | 0.000313136 | 0.313136   | 0.001        | 0.000186445 | 0.186445   | 0.001        | 0.001     | ubiquitin carrier protein                                          |
| XP_009691445.1 | 0.0170968   | 0.430543   | 0.0397099    | 0.00417589  | 0.607288   | 0.0068763    | 0.023293  | nucleosome assembly protein                                        |
| XP_009691446.1 | 0.018263    | 0.552298   | 0.0330674    | 0.0141809   | 0.676421   | 0.0209646    | 0.027016  | proteasome subunit                                                 |
| XP_009691447.1 | 0.00557892  | 0.378469   | 0.0147407    | 0.0057026   | 0.258423   | 0.0220669    | 0.018404  | proliferating cell nuclear antigen 1                               |
| XP_009691448.1 | 0.0263206   | 0.26201    | 0.100457     | 0.0435231   | 0.363703   | 0.119666     | 0.110062  | uncharacterized protein                                            |
| XP_009691449.1 | 0.0138716   | 0.393056   | 0.0352917    | 0.0113156   | 0.488026   | 0.0231864    | 0.029239  | DNA helicase                                                       |
| XP_009691450.1 | 0.0131383   | 1.01265    | 0.0129742    | 0.0177756   | 0.91163    | 0.0194987    | 0.016236  | conserved hypothetical protein                                     |
| XP_009691451.1 | 0.0626606   | 0.744986   | 0.0841098    | 0.0424403   | 0.767034   | 0.0553304    | 0.06972   | conserved hypothetical protein                                     |
| XP_009691452.1 | NA          | NA         | NA           | NA          | NA         | NA           | NA        | conserved hypothetical protein                                     |
| XP_009691453.1 | 0.0971098   | 0.504543   | 0.192471     | 0.0999099   | 0.490245   | 0.203796     | 0.198134  | conserved hypothetical protein                                     |
| XP_009691454.1 | 0.0667608   | 0.574382   | 0.116231     | 0.0647994   | 0.761295   | 0.0851173    | 0.100674  | conserved hypothetical protein                                     |
| XP_009691457.1 | 0.0115958   | 0.598465   | 0.0193759    | 0.0127991   | 0.555845   | 0.0230264    | 0.021201  | spliceosome-associated protein                                     |
| XP_009691458.1 | 0.0581964   | 0.610446   | 0.0953343    | 0.0494985   | 0.537721   | 0.0920524    | 0.093693  | uncharacterized protein                                            |
| XP_009691459.1 | 0.0460988   | 0.529437   | 0.0870714    | 0.0419876   | 0.581303   | 0.0722302    | 0.079651  | DEAD-box family RNA helicase                                       |
| XP_009691460.1 | 0.036587    | 0.499089   | 0.0733075    | 0.00694154  | 0.324872   | 0.021367     | 0.047337  | replication factor                                                 |
| XP_009691461.1 | 0.016037    | 0.121335   | 0.132171     | 0.0146838   | 0.122981   | 0.119399     | 0.125785  | mitochondrial carrier protein                                      |
| XP_009691462.1 | 0.0391268   | 0.422021   | 0.092713     | 0.0479929   | 0.397606   | 0.120705     | 0.106709  | uncharacterized protein                                            |
| XP_009691463.1 | 0.00516903  | 0.440321   | 0.0117392    | 0.0106651   | 0.307831   | 0.0346458    | 0.023192  | U3 small nucleolar ribonucleoprotein/40S ribosomal protein S4-like |
| XP_009691464.1 | 0.000581681 | 0.581681   | 0.001        | 0.000382178 | 0.382178   | 0.001        | 0.001     | 40S ribosomal protein S28                                          |
| XP_009691465.1 | 0.0605383   | 0.447452   | 0.135296     | 0.0553276   | 0.719065   | 0.0769439    | 0.10612   | phosphatidylinositol-4-phosphate 5-kinase                          |
| XP_009691466.1 | 0.0702592   | 0.620399   | 0.113249     | 0.070036    | 0.624364   | 0.112172     | 0.112171  | nucleotide binding protein 2                                       |
| XP_009691467.1 | 0.0283929   | 0.35634    | 0.0796794    | 0.0199839   | 0.283336   | 0.0705306    | 0.075105  | DNA primase large subunit                                          |
| XP_009691468.1 | 0.0925102   | 0.289167   | 0.31992      | 0.0595609   | 0.264586   | 0.225109     | 0.272514  | uncharacterized protein                                            |
| XP_009691469.1 | 0.0435888   | 0.309749   | 0.140723     | 0.0293939   | 0.206668   | 0.142228     | 0.141475  | dehydrodolichyl diphosphate synthase                               |
| XP_009691470.1 | 0.0297397   | 0.972277   | 0.0305877    | 0.0293087   | 0.7788     | 0.0376332    | 0.03411   | protein disulphide isomerase                                       |
| XP_009691471.1 | 0.0424175   | 0.501058   | 0.0846558    | 0.0481936   | 0.609933   | 0.0790145    | 0.081835  | uncharacterized protein                                            |
| XP_009691472.1 | 0.00514992  | 0.362985   | 0.0141877    | 0.000363902 | 0.363902   | 0.001        | 0.007594  | U6 snRNA-associated sm-like protein                                |
| XP_009691473.1 | 0.0525059   | 0.61564    | 0.0852867    | 0.0527388   | 0.412686   | 0.127794     | 0.10654   | conserved hypothetical protein                                     |
| XP_009691474.1 | 0.106396    | 0.521955   | 0.203841     | 0.081905    | 0.372719   | 0.21975      | 0.211795  | uncharacterized protein                                            |
| XP_009691475.1 | 0.0454742   | 0.644145   | 0.0705962    | 0.0246973   | 0.489874   | 0.0504157    | 0.060506  | conserved hypothetical protein                                     |
| XP_009691476.1 | 0.150093    | 0.124222   | 1.20826      |             |            |              | 1.20826   | hypothetical protein                                               |
| XP_009691477.1 | 0.126335    | 0.831439   | 0.151947     | 0.110445    | 0.572975   | 0.192757     | 0.172352  | uncharacterized protein                                            |
| XP_009691478.1 | 0.0368581   | 0.572052   | 0.0644313    | 0.0499604   | 0.42994    | 0.116203     | 0.090317  | uncharacterized protein                                            |
| XP_009691479.1 | 0.0179721   | 0.478829   | 0.0375335    | 0.025629    | 0.402597   | 0.0636594    | 0.050596  | mitochondrial import inner membrane translocase subunit            |
| XP_009691480.1 | 0.0724627   | 0.562858   | 0.128741     | 0.0622209   | 0.557755   | 0.111556     | 0.120148  | uncharacterized protein                                            |
| XP_009691481.1 | 0.0516981   | 0.743002   | 0.0695801    | 0.0418502   | 0.68227    | 0.0613397    | 0.06546   | neutral sphingomyelinase                                           |
| XP_009691482.1 | 0.0273241   | 0.45001    | 0.0607189    | 0.0163001   | 0.520246   | 0.0313316    | 0.046025  | uncharacterized protein                                            |
| XP_009691483.1 | 0.00166931  | 0.558652   | 0.0029881    | 0.0052922   | 0.428086   | 0.0123625    | 0.007675  | prohibitin                                                         |
| XP_009691484.1 | 0.0195845   | 0.389483   | 0.0502834    | 0.0133022   | 0.297977   | 0.0446415    | 0.047462  | uncharacterized protein                                            |
| XP_009691485.1 | 0.0984979   | 0.428372   | 0.229935     | 0.0858648   | 0.32403    | 0.26499      | 0.247463  | conserved hypothetical protein                                     |
| XP_009691486.1 | NA          | NA         | NA           | NA          | NA         | NA           | NA        | hypothetical protein                                               |
| XP_009691487.1 | 0.031014    | 0.363166   | 0.0853989    |             |            |              | 0.0853989 | uncharacterized protein                                            |

| protein_id     | Chitose_ka  | Chitose_ks | Chitose_kaks | Buffeli_ka  | Buffeli_ks | Buffeli_kaks | mean_kaks | function                                                |
|----------------|-------------|------------|--------------|-------------|------------|--------------|-----------|---------------------------------------------------------|
| XP_009691488.1 | 0.0548403   | 0.545629   | 0.100508     | 0.0529142   | 0.518659   | 0.102021     | 0.101265  | pentatricopeptide repeat containing protein             |
| XP_009691489.1 | 0.0382596   | 1.39101    | 0.0275049    | 0.0270551   | 1.65752    | 0.0163226    | 0.021914  | conserved hypothetical protein                          |
| XP_009691490.1 | 0.0201652   | 0.448925   | 0.0449189    | 0.000313823 | 0.313823   | 0.001        | 0.022959  | RNA processing factor                                   |
| XP_009691491.1 | 0.0421904   | 0.902718   | 0.0467371    | 0.0367425   | 0.855404   | 0.0429535    | 0.044845  | RNA processing factor                                   |
| XP_009691492.1 | 0.0418194   | 0.731279   | 0.0571867    | 0.0390261   | 0.776578   | 0.0502539    | 0.05372   | uncharacterized protein                                 |
| XP_009691493.1 | 0.0147141   | 0.276196   | 0.0532742    |             |            |              | 0.0532742 | conserved hypothetical protein                          |
| XP_009691494.1 | 0.0568247   | 0.633289   | 0.0897296    | 0.0451337   | 0.627051   | 0.0719777    | 0.080854  | uncharacterized protein                                 |
| XP_009691495.1 | 0.0344816   | 0.77271    | 0.0446242    | 0.0333383   | 0.800369   | 0.0416536    | 0.043139  | DEAD-box family helicase                                |
| XP_009691496.1 | 0.068339    | 0.564287   | 0.121107     | 0.0807974   | 0.594596   | 0.135886     | 0.128497  | conserved hypothetical protein                          |
| XP_009691498.1 | 0.0588872   | 0.47872    | 0.12301      | 0.0369606   | 0.441495   | 0.0837169    | 0.103363  | conserved hypothetical protein                          |
| XP_009691499.1 | 0.0574985   | 0.424426   | 0.135473     | 0.0482399   | 0.461605   | 0.104505     | 0.119989  | conserved hypothetical protein                          |
| XP_009691500.1 | 0.133803    | 0.506863   | 0.263982     | 0.0837118   | 0.622647   | 0.134445     | 0.199213  | conserved hypothetical protein                          |
| XP_009691501.1 | 0.0592519   | 0.428625   | 0.138237     | 0.024258    | 0.28094    | 0.0863459    | 0.112291  | conserved hypothetical protein                          |
| XP_009691502.1 | 0.016722    | 0.396991   | 0.042122     | 0.0143418   | 0.485628   | 0.0295326    | 0.035827  | lysine-tRNA ligase                                      |
| XP_009691504.1 | 0.12313     | 0.449822   | 0.273731     | 0.146667    | 0.500485   | 0.29305      | 0.28339   | uncharacterized protein                                 |
| XP_009691505.1 | 0.0581593   | 0.697984   | 0.0833246    | 0.0435723   | 0.627729   | 0.0694126    | 0.076369  | conserved hypothetical protein                          |
| XP_009691506.1 | 0.0618705   | 0.626046   | 0.0988275    | 0.0532443   | 0.549907   | 0.0968243    | 0.097826  | MUS81 endonuclease homolog                              |
| XP_009691507.1 | 0.0226195   | 0.490601   | 0.0461057    | 0.00672881  | 0.468019   | 0.0143772    | 0.030241  | syntaxin                                                |
| XP_009691508.1 | 0.0529834   | 0.447925   | 0.118286     | 0.0447802   | 0.385447   | 0.116177     | 0.117232  | conserved hypothetical protein                          |
| XP_009691509.1 | 0.0978433   | 0.515172   | 0.189923     | 0.0916358   | 0.4899     | 0.18705      | 0.188487  | conserved hypothetical protein                          |
| XP_009691510.1 | 0.0587523   | 0.817614   | 0.0718582    | 0.0509064   | 0.435372   | 0.116926     | 0.094392  | conserved hypothetical protein                          |
| XP_009691512.1 | 0.0336968   | 0.821423   | 0.0410224    | 0.0278131   | 0.71872    | 0.0386981    | 0.03986   | conserved hypothetical protein                          |
| XP_009691513.1 | 0.0128254   | 1.15086    | 0.0111442    | 0.00826844  | 1.02653    | 0.00805477   | 0.009599  | transcription factor IIIb subunit                       |
| XP_009691514.1 | 0.0403491   | 0.876818   | 0.0460177    | 0.0444041   | 0.811504   | 0.0547183    | 0.050368  | ion-translocating ATPase                                |
| XP_009691515.1 | 0.0388411   | 0.305231   | 0.127251     | 0.0243796   | 0.378762   | 0.0643664    | 0.095809  | membrane transporter                                    |
| XP_009691516.1 | 0.00812774  | 1.19377    | 0.00680849   | 0.00555175  | 0.932051   | 0.00595649   | 0.006382  | DEAD-box family helicase                                |
| XP_009691517.1 | 0.0210828   | 0.618447   | 0.0340899    | 0.0197669   | 0.490298   | 0.040316     | 0.037203  | uncharacterized protein                                 |
| XP_009691518.1 | 0.000289264 | 0.289264   | 0.001        | 0.0101386   | 0.182139   | 0.0556642    | 0.083332  | 60S ribosomal protein L37a                              |
| XP_009691519.1 | 0.0120289   | 0.381966   | 0.031492     | 0.000222776 | 0.222776   | 0.001        | 0.016246  | protein translocation complex subunit gamma chain       |
| XP_009691520.1 | 0.0483574   | 0.953142   | 0.0507347    | 0.03574     | 0.769939   | 0.0464193    | 0.048577  | uncharacterized protein                                 |
| XP_009691521.1 | 0.0614517   | 0.136599   | 0.449871     |             |            |              | 0.449871  | conserved hypothetical protein                          |
| XP_009691523.1 | 0.0655498   | 0.561893   | 0.116659     | 0.0664565   | 0.477893   | 0.139062     | 0.12786   | conserved hypothetical protein                          |
| XP_009691524.1 | 0.024514    | 0.616199   | 0.0397827    | 0.0152986   | 0.609087   | 0.0251172    | 0.03245   | uncharacterized protein                                 |
| XP_009691525.1 | 0.0886932   | 0.806848   | 0.109925     | 0.0818154   | 1.08551    | 0.0753705    | 0.092648  | 2-C-methyl-D-erythritol 2%2C4-cyclodiphosphate synthase |
| XP_009691526.1 | 0.0285568   | 0.620466   | 0.0460248    | 0.0295939   | 0.515151   | 0.057447     | 0.051736  | conserved hypothetical protein                          |
| XP_009691527.1 | 0.0406697   | 0.296742   | 0.137054     | 0.0157981   | 0.153818   | 0.102706     | 0.11988   | conserved hypothetical protein                          |
| XP_009691528.1 | 0.0670733   | 0.662534   | 0.101238     | 0.0716278   | 0.573733   | 0.124845     | 0.113041  | uncharacterized protein                                 |
| XP_009691529.1 | 0.109026    | 0.529103   | 0.206058     | 0.104848    | 0.515088   | 0.203554     | 0.204806  | conserved hypothetical protein                          |
| XP_009691530.1 | 0.0210565   | 0.474289   | 0.0443959    | 0.0295738   | 0.40653    | 0.0727469    | 0.058571  | mitochondrial carrier protein                           |
| XP_009691531.1 | 0.0220628   | 0.224543   | 0.0982565    | 0.0249537   | 0.184826   | 0.135012     | 0.116634  | conserved hypothetical protein                          |
| XP_009691532.1 | 0.0612615   | 0.357452   | 0.171384     | 0.0546486   | 0.27576    | 0.198175     | 0.184779  | conserved hypothetical protein                          |
| XP_009691533.1 | 0.0535623   | 0.499497   | 0.107232     | 0.0455101   | 0.393093   | 0.115774     | 0.111503  | cysteine proteinase                                     |
| XP_009691534.1 | 0.0501831   | 1.28079    | 0.0391814    | 0.0188669   | 0.681723   | 0.0276753    | 0.033428  | conserved hypothetical protein                          |
| XP_009691535.1 | 0.0200992   | 0.472002   | 0.0425829    |             |            |              | 0.0425829 | conserved hypothetical protein                          |
| XP_009691536.1 | 0.0148792   | 0.652845   | 0.0227913    |             |            |              | 0.0227913 | conserved hypothetical protein                          |
| XP_009691537.1 | 0.021208    | 0.21449    | 0.0988764    |             |            |              | 0.0988764 | conserved hypothetical protein                          |
| XP_009691538.1 | 0.118451    | 0.617729   | 0.191752     | 0.102417    | 0.509868   | 0.200869     | 0.19631   | conserved hypothetical protein                          |
| XP_009691539.1 | 0.0495069   | 0.211778   | 0.233767     |             |            |              | 0.233767  | conserved hypothetical protein                          |
| XP_009691540.1 | 0.0576813   | 0.603019   | 0.0956542    | 0.000243186 | 0.243186   | 0.001        | 0.048327  | peptidyl-prolyl cis-trans isomerase                     |
| XP_009691541.1 | 0.038203    | 0.431274   | 0.0885818    | 0.0614887   | 0.5609     | 0.109625     | 0.099103  | uncharacterized protein                                 |
| XP_009691542.1 | 0.0870869   | 0.59727    | 0.145808     | 0.0807501   | 0.630724   | 0.128028     | 0.136918  | uncharacterized protein                                 |
| XP_009691543.1 | 0.0155051   | 0.663571   | 0.0233661    | 0.00910291  | 0.58729    | 0.0154999    | 0.019433  | uncharacterized protein                                 |
| XP_009691544.1 | 0.0844202   | 0.885244   | 0.0953637    | 0.081573    | 0.936063   | 0.0871448    | 0.091254  | uncharacterized protein                                 |

| protein_id     | Chitose_ka  | Chitose_ks | Chitose_kaks | Buffeli_ka  | Buffeli_ks | Buffeli_kaks | mean_kaks | function                                    |
|----------------|-------------|------------|--------------|-------------|------------|--------------|-----------|---------------------------------------------|
| XP_009691545.1 | 0.0231233   | 0.444951   | 0.0519682    | 0.0206698   | 0.430418   | 0.0480227    | 0.049995  | glucose-6-phosphate isomerase               |
| XP_009691546.1 | 0.12491     | 0.672003   | 0.185877     | 0.116042    | 0.48287    | 0.240317     | 0.213097  | hypothetical protein                        |
| XP_009691547.1 | 0.0381687   | 0.373362   | 0.10223      | 0.0423654   | 0.366068   | 0.115731     | 0.108981  | conserved hypothetical protein              |
| XP_009691548.1 | 0.0299034   | 0.339454   | 0.0880928    | 0.0149287   | 0.371661   | 0.0401676    | 0.06413   | ER lumen protein retaining receptor 1       |
| XP_009691549.1 | 0.0468975   | 0.549644   | 0.0853235    | 0.0224741   | 0.476605   | 0.0471545    | 0.066239  | uncharacterized protein                     |
| XP_009691550.1 | 0.15475     | 0.526785   | 0.293762     |             |            |              | 0.293762  | major facilitator superfamily MFS-1 protein |
| XP_009691551.1 | 0.0378041   | 0.900756   | 0.0419693    | 0.029492    | 0.986101   | 0.0299077    | 0.035938  | integral membrane protein                   |
| XP_009691552.1 | 0.0725651   | 0.483952   | 0.149943     | 0.0406585   | 0.353166   | 0.115126     | 0.132534  | integral membrane protein                   |
| XP_009691553.1 | 0.0425122   | 0.347997   | 0.122162     | 0.0335182   | 0.37994    | 0.0882198    | 0.105191  | integral membrane protein                   |
| XP_009691555.1 | 0.0169507   | 0.202486   | 0.0837128    |             |            |              | 0.0837128 | uncharacterized protein                     |
| XP_009691556.1 | 0.0738234   | 0.853523   | 0.0864926    | 0.0575112   | 1.71353    | 0.0335631    | 0.060028  | conserved hypothetical protein              |
| XP_009691557.1 | 0.0762081   | 0.381006   | 0.200018     | 0.11033     | 0.49452    | 0.223106     | 0.211562  | peptidyl-prolyl cis-trans isomerase         |
| XP_009691558.1 | 0.0261237   | 0.403132   | 0.0648019    | 0.0176879   | 0.383667   | 0.0461023    | 0.055452  | ubiquitin carrier protein                   |
| XP_009691559.1 | 0.0826137   | 0.595029   | 0.13884      | 0.0842763   | 0.485173   | 0.173704     | 0.156272  | uncharacterized protein                     |
| XP_009691560.1 | 0.0467993   | 0.872812   | 0.0536191    | 0.0424618   | 0.878777   | 0.0483192    | 0.050969  | uncharacterized protein                     |
| XP_009691561.1 | 0.0413421   | 0.518824   | 0.0796843    | 0.0424546   | 0.469841   | 0.0903595    | 0.085022  | uncharacterized protein                     |
| XP_009691562.1 | 0.0888173   | 0.527367   | 0.168416     | 0.0315136   | 0.423386   | 0.0744323    | 0.121424  | conserved hypothetical protein              |
| XP_009691563.1 | 0.0221314   | 0.291593   | 0.0758983    | 0.0194512   | 0.297983   | 0.0652763    | 0.070587  | 50S ribosomal protein L12                   |
| XP_009691564.1 | 0.0836136   | 0.425996   | 0.196278     | 0.0811701   | 0.445703   | 0.182117     | 0.189198  | conserved hypothetical protein              |
| XP_009691565.1 |             |            |              | 0.00948096  | 0.189577   | 0.0500111    | 0.0500111 | conserved hypothetical protein              |
| XP_009691567.1 | 0.0582408   | 0.415981   | 0.140008     | 0.0325107   | 0.187257   | 0.173616     | 0.156812  | uncharacterized protein                     |
| XP_009691568.1 | 0.0814882   | 0.447286   | 0.182184     | 0.077346    | 0.570266   | 0.135631     | 0.158908  | uncharacterized protein                     |
| XP_009691569.1 | 0.0426897   | 0.493929   | 0.0864288    | 0.0346085   | 0.474526   | 0.0729328    | 0.079681  | uncharacterized protein                     |
| XP_009691570.1 | 0.0750147   | 0.410866   | 0.182577     | 0.0524235   | 0.299124   | 0.175257     | 0.178917  | uncharacterized protein                     |
| XP_009691571.1 | 0.0355609   | 0.563862   | 0.0630666    | 0.0469495   | 0.371124   | 0.126506     | 0.094786  | conserved hypothetical protein              |
| XP_009691572.1 | 0.0274411   | 0.38315    | 0.0716197    | 0.0333832   | 0.344346   | 0.0969467    | 0.084283  | uncharacterized protein                     |
| XP_009691573.1 | 0.000472521 | 0.472521   | 0.001        | 0.000500368 | 0.500368   | 0.001        | 0.001     | casein kinase                               |
| XP_009691574.1 | 0.0721314   | 0.539137   | 0.13379      | 0.0504335   | 0.463332   | 0.10885      | 0.12132   | chromosome segregation protein              |
| XP_009691575.1 | 0.0870432   | 0.413394   | 0.210558     | 0.0963384   | 0.360288   | 0.267393     | 0.238976  | hypothetical protein                        |
| XP_009691576.1 | 0.123164    | 0.355808   | 0.346154     | 0.0957664   | 0.296868   | 0.322589     | 0.334372  | hypothetical protein                        |
| XP_009691577.1 | 0.097878    | 0.40725    | 0.240339     | 0.0902059   | 0.35433    | 0.254582     | 0.24746   | conserved hypothetical protein              |
| XP_009691578.1 | 0.0434591   | 0.196471   | 0.221198     | 0.037592    | 0.194474   | 0.193301     | 0.20725   | uncharacterized protein                     |
| XP_009691579.1 | 0.0650843   | 0.489829   | 0.132871     | 0.0498791   | 0.556149   | 0.0896864    | 0.111279  | uncharacterized protein                     |
| XP_009691580.1 | 0.0370062   | 0.343303   | 0.107795     | 0.0248113   | 0.281912   | 0.0880109    | 0.097903  | pepsinogen                                  |
| XP_009691581.1 | 0.13789     | 0.52699    | 0.261655     | 0.118508    | 0.486808   | 0.243439     | 0.252547  | conserved hypothetical protein              |
| XP_009691582.1 | 0.0400444   | 0.395569   | 0.101232     | 0.0441903   | 0.460878   | 0.0958827    | 0.098557  | uncharacterized protein                     |
| XP_009691583.1 | 0.042147    | 0.371916   | 0.113324     | 0.0272375   | 0.251608   | 0.108254     | 0.110789  | uncharacterized protein                     |
| XP_009691584.1 | 0.0477939   | 0.601561   | 0.0794497    |             |            |              | 0.0794497 | uncharacterized protein                     |
| XP_009691585.1 | 0.0378392   | 0.618046   | 0.0612239    | 0.0262975   | 0.751537   | 0.0349916    | 0.048108  | uncharacterized protein                     |
| XP_009691586.1 | 0.0100617   | 0.328873   | 0.0305945    | NA          | NA         | NA           | NA        | conserved hypothetical protein              |
| XP_009691588.1 | 0.0822992   | 0.629503   | 0.130737     | 0.0708856   | 0.614896   | 0.115281     | 0.123009  | uncharacterized protein                     |
| XP_009691589.1 | 0.0408853   | 0.490484   | 0.0833571    | 0.0471714   | 0.45413    | 0.103872     | 0.093615  | conserved hypothetical protein              |
| XP_009691590.1 | 0.000124236 | 0.124236   | 0.001        |             |            |              | 0.001     | U2 snRNP auxiliary factor                   |
| XP_009691591.1 | 0.019577    | 0.019577   | 0.0754665    | 0.00688893  | 0.265242   | 0.0259722    | 0.050719  | proteasome subunit alpha type               |
| XP_009691592.1 | 0.011951    | 0.910995   | 0.0131186    | 0.0163468   | 1.00169    | 0.0163192    | 0.014719  | Prp8 protein                                |
| XP_009691593.1 | 0.0849137   | 0.436261   | 0.19464      | 0.0909131   | 0.704113   | 0.129117     | 0.161879  | conserved hypothetical protein              |
| XP_009691594.1 | 0.0594172   | 0.498378   | 0.119221     | 0.0573908   | 0.348637   | 0.164615     | 0.141918  | conserved hypothetical protein              |
| XP_009691595.1 | 0.088127    | 0.60086    | 0.146668     | 0.0761353   | 0.49732    | 0.153091     | 0.149879  | uncharacterized protein                     |
| XP_009691596.1 | 0.0666212   | 0.629185   | 0.105885     | 0.0743023   | 0.572664   | 0.129749     | 0.117817  | uncharacterized protein                     |
| XP_009691598.1 | NA          | NA         | NA           |             |            |              | NA        | conserved hypothetical protein              |
| XP_009691599.1 | 0.0424669   | 0.54789    | 0.0775098    | 0.0427219   | 0.956013   | 0.0446876    | 0.061099  | cysteine protease precursor TacP            |
| XP_009691600.1 | 0.0898749   | 0.798863   | 0.112504     | 0.119666    | 0.830445   | 0.144098     | 0.128301  | uncharacterized protein                     |
| XP_009691601.1 | 0.0815361   | 0.981415   | 0.0830801    | 0.0963316   | 1.07783    | 0.0893756    | 0.086228  | cysteine proteinase precursor               |



| protein_id     | Chitose_ka | Chitose_ks | Chitose_kaks | Buffeli_ka | Buffeli_ks | Buffeli_kaks | mean_kaks | function                          |
|----------------|------------|------------|--------------|------------|------------|--------------|-----------|-----------------------------------|
| XP_009691602.1 | 0.0652605  | 0.890767   | 0.0732633    | 0.0572037  | 0.884403   | 0.0646806    | 0.068972  | cysteine protease precursor TacP  |
| XP_009691603.1 | 0.0310372  | 0.554933   | 0.0559297    | 0.0291904  | 0.595604   | 0.0490098    | 0.05247   | Tocp1 variant tocp4               |
| XP_009691604.1 |            |            |              | 0.0216325  | 0.0789125  | 0.274133     | 0.274133  | hypothetical protein              |
| XP_009691605.1 | 0.0660642  | 0.843663   | 0.0783065    | 0.0628687  | 0.872523   | 0.0720539    | 0.07518   | cysteine protease precursor TacP  |
| XP_009691606.1 | 0.0252977  | 0.470757   | 0.0537383    | 0.0220757  | 0.4499     | 0.0490681    | 0.051403  | uncharacterized protein           |
| XP_009691608.1 | 0.0452455  | 0.180582   | 0.250554     | 0.0382159  | 0.212462   | 0.179872     | 0.215213  | conserved hypothetical protein    |
| XP_009691609.1 | 0.0425726  | 0.268109   | 0.158788     | 0.0343594  | 0.224461   | 0.153075     | 0.155932  | eukaryotic initiation factor      |
| XP_009691610.1 | 0.0643595  | 0.421777   | 0.152591     | 0.046496   | 0.483344   | 0.0961965    | 0.124394  | uncharacterized protein           |
| XP_009691611.1 | 0.0364702  | 0.509867   | 0.0715288    | 0.0273349  | 0.48068    | 0.0568671    | 0.064198  | conserved hypothetical protein    |
| XP_009691612.1 | 0.0542114  | 0.388789   | 0.139436     | 0.0176072  | 0.436772   | 0.0403121    | 0.089874  | conserved hypothetical protein    |
| XP_009691613.1 | 0.0421661  | 0.705912   | 0.0597329    | 0.0320736  | 0.669005   | 0.0479423    | 0.053838  | uncharacterized protein           |
| XP_009691614.1 | 0.0713513  | 0.48899    | 0.145916     | 0.0507477  | 0.432547   | 0.117323     | 0.13162   | uncharacterized protein           |
| XP_009691615.1 | 0.0150123  | 0.46784    | 0.0320885    | 0.00834059 | 0.38549    | 0.0216363    | 0.026862  | 50S ribosomal protein L2          |
| XP_009691616.1 | 0.0842046  | 0.454102   | 0.185431     | 0.0980306  | 0.471593   | 0.207871     | 0.196651  | uncharacterized protein           |
| XP_009691617.1 | 0.0307372  | 0.461568   | 0.0665931    | 0.0218306  | 0.568277   | 0.0384154    | 0.052504  | pre-mRNA processing factor        |
| XP_009691618.1 | 0.133058   | 0.613115   | 0.21702      | 0.13334    | 0.711473   | 0.187414     | 0.202217  | conserved hypothetical protein    |
| XP_009691619.1 | 0.0184755  | 0.190392   | 0.0970393    | 0.0138106  | 0.122873   | 0.112398     | 0.104719  | conserved hypothetical protein    |
| XP_009691620.1 | 0.0219412  | 0.29633    | 0.0740432    | 0.0235018  | 0.3288     | 0.0714776    | 0.07276   | bifunctional nuclease             |
| XP_009691621.1 | 0.214199   | 0.556227   | 0.385092     | 0.185176   | 0.572687   | 0.323346     | 0.354219  | conserved hypothetical protein    |
| XP_009691622.1 | 0.0224722  | 0.542511   | 0.0414225    | 0.0518662  | 0.53376    | 0.0971713    | 0.069297  | conserved hypothetical protein    |
| XP_009691623.1 | 0.0230621  | 0.272907   | 0.0845053    | 0.0250398  | 0.208857   | 0.11989      | 0.102198  | uncharacterized protein           |
| XP_009691624.1 | 0.112895   | 0.523459   | 0.215672     | 0.114703   | 0.558427   | 0.205403     | 0.210537  | uncharacterized protein           |
| XP_009691625.1 | 0.0770557  | 0.423939   | 0.181761     | 0.0508702  | 0.547475   | 0.0929178    | 0.137339  | conserved hypothetical protein    |
| XP_009691626.1 | 0.044631   | 0.44218    | 0.100934     | 0.0273775  | 0.43271    | 0.0632698    | 0.082102  | uncharacterized protein           |
| XP_009691627.1 | 0.0261062  | 0.513864   | 0.0508037    | 0.0220676  | 0.34002    | 0.0649009    | 0.057852  | conserved hypothetical protein    |
| XP_009691628.1 | 0.0289196  | 0.71039    | 0.0407094    | 0.0138065  | 0.537301   | 0.025696     | 0.033203  | uncharacterized protein           |
| XP_009691629.1 | 0.0487736  | 0.497889   | 0.0979607    | 0.0514855  | 0.487842   | 0.105537     | 0.101749  | conserved hypothetical protein    |
| XP_009691630.1 | 0.0689226  | 0.556287   | 0.123897     | 0.0737952  | 0.447047   | 0.165073     | 0.144485  | uncharacterized protein           |
| XP_009691631.1 | 0.0666264  | 0.489755   | 0.13604      | 0.0644708  | 0.415443   | 0.155186     | 0.145613  | uncharacterized protein           |
| XP_009691632.1 | 0.0675882  | 0.338079   | 0.199918     | 0.05084    | 0.283131   | 0.179564     | 0.189741  | conserved hypothetical protein    |
| XP_009691633.1 | 0.0368599  | 0.552073   | 0.0667665    | 0.0440591  | 0.519909   | 0.0847438    | 0.075755  | uncharacterized protein           |
| XP_009691634.1 | 0.0586125  | 0.430295   | 0.136215     | 0.0573925  | 0.409525   | 0.140144     | 0.13818   | Conserved hypothetical protein    |
| XP_009691635.1 | 0.114768   | 0.561612   | 0.204355     | 0.108096   | 0.630977   | 0.171315     | 0.187835  | Conserved hypothetical protein    |
| XP_009691636.1 | 0.112996   | 0.533485   | 0.211808     | 0.0672751  | 0.332745   | 0.202182     | 0.206995  | uncharacterized protein           |
| XP_009691637.1 | 0.0891538  | 0.337318   | 0.264302     | 0.071615   | 0.288861   | 0.247922     | 0.256112  | conserved hypothetical protein    |
| XP_009691638.1 | 0.0651094  | 0.353247   | 0.184317     | 0.0685773  | 0.374451   | 0.183141     | 0.183729  | conserved hypothetical protein    |
| XP_009691639.1 | 0.0974674  | 0.331806   | 0.293748     | 0.0427491  | 0.258176   | 0.165582     | 0.229665  | Box C/D snoRNA protein            |
| XP_009691640.1 | 0.0743637  | 0.471832   | 0.157606     | 0.066378   | 0.445664   | 0.148942     | 0.153274  | uncharacterized protein           |
| XP_009691641.1 | 0.0673847  | 0.293164   | 0.229853     |            |            |              | 0.229853  | conserved hypothetical protein    |
| XP_009691642.1 | 0.0444661  | 0.285386   | 0.15581      | 0.061063   | 0.273735   | 0.223073     | 0.189441  | hypothetical protein              |
| XP_009691643.1 | 0.0569058  | 0.394852   | 0.144119     | 0.0423158  | 0.408388   | 0.103617     | 0.123868  | uncharacterized protein           |
| XP_009691644.1 | 0.00976323 | 0.0488629  | 0.199809     |            |            |              | 0.199809  | uncharacterized protein           |
| XP_009691645.1 | 0.0625921  | 0.701626   | 0.0892101    | 0.0717502  | 0.812792   | 0.0882762    | 0.088743  | uncharacterized protein           |
| XP_009691646.1 | 0.154257   | 0.786529   | 0.196124     | 0.156115   | 0.819556   | 0.190487     | 0.193305  | hypothetical protein              |
| XP_009691647.1 | 0.0314377  | 0.561887   | 0.0559502    | 0.0211752  | 0.353177   | 0.0599564    | 0.057953  | DNA replication licensing factor  |
| XP_009691648.1 | 0.014811   | 0.457406   | 0.0323805    | 0.0132516  | 0.442854   | 0.0299232    | 0.031152  | uncharacterized protein           |
| XP_009691649.1 | 0.0920307  | 0.957209   | 0.0961448    | 0.0918662  | 1.34208    | 0.0684508    | 0.082298  | uncharacterized protein           |
| XP_009691650.1 | 0.0925663  | 0.326675   | 0.283359     |            |            |              | 0.283359  | conserved hypothetical protein    |
| XP_009691651.1 | 0.0163485  | 0.324236   | 0.0504216    | 0.0120794  | 0.291585   | 0.0414266    | 0.045924  | uncharacterized protein           |
| XP_009691652.1 | 0.032223   | 0.693018   | 0.0464966    | 0.0262141  | 0.66402    | 0.0394779    | 0.042987  | seryl-tRNA synthetase             |
| XP_009691653.1 | 0.0452834  | 0.553656   | 0.0817898    | 0.0455194  | 0.56395    | 0.0807153    | 0.081253  | RNA 3'-terminal phosphate cyclase |
| XP_009691654.1 | 0.0303828  | 0.519689   | 0.0584635    | 0.0296245  | 0.381475   | 0.0776577    | 0.068061  | succinate dehydrogenase subunit   |
| XP_009691655.1 | 0.00942413 | 0.152703   | 0.0617155    | 0.0100126  | 0.0718149  | 0.139422     | 0.100569  | 50S ribosomal protein L27         |

| protein_id     | Chitose_ka  | Chitose_ks | Chitose_kaks | Buffeli_ka  | Buffeli_ks | Buffeli_kaks | mean_kaks | function                               |
|----------------|-------------|------------|--------------|-------------|------------|--------------|-----------|----------------------------------------|
| XP_009691656.1 | 0.0268259   | 0.486819   | 0.0551044    | 0.0207286   | 0.437444   | 0.0473857    | 0.051245  | dihydrolipoyl dehydrogenase            |
| XP_009691658.1 | 0.00320041  | 0.455062   | 0.00703291   | 6.51864E-05 | 0.0651864  | 0.001        | 0.004016  | sulfur metabolism negative regulator   |
| XP_009691659.1 | 0.0642851   | 0.59515    | 0.108015     | 0.046354    | 0.549659   | 0.0843324    | 0.096174  | conserved hypothetical protein         |
| XP_009691660.1 | 0.0306795   | 0.441562   | 0.0694796    |             |            |              | 0.0694796 | uncharacterized protein                |
| XP_009691661.1 | 0.0382066   | 0.347607   | 0.109913     | 0.00979522  | 0.35661    | 0.0274676    | 0.06869   | 60S ribosomal protein L24              |
| XP_009691662.1 | 0.0450202   | 0.41723    | 0.107903     | 0.0455139   | 0.459927   | 0.0989589    | 0.103431  | uncharacterized protein                |
| XP_009691663.1 | 0.0414188   | 0.153774   | 0.269348     |             |            |              | 0.269348  | conserved hypothetical protein         |
| XP_009691669.1 | 0.0301455   | 0.541566   | 0.0556637    | 0.0222305   | 0.398687   | 0.0557595    | 0.055712  | inosine-5'-monophosphate dehydrogenase |
| XP_009691671.1 | 0.115381    | 0.57538    | 0.200531     |             |            |              | 0.200531  | hypothetical protein                   |
| XP_009691672.1 | 0.0415112   | 0.381484   | 0.108815     | 0.0433448   | 0.429392   | 0.100945     | 0.10488   | uncharacterized protein                |
| XP_009691673.1 | 0.0200352   | 0.381127   | 0.0525682    | 0.00889239  | 0.314196   | 0.028302     | 0.040435  | uncharacterized protein                |
| XP_009691674.1 | 0.023576    | 0.289869   | 0.0813332    | 0.0373451   | 0.198249   | 0.188375     | 0.134854  | conserved hypothetical protein         |
| XP_009691676.1 | 0.0055134   | 1.0362     | 0.00532077   | 0.00515767  | 0.792967   | 0.00650426   | 0.005913  | splicing factor subunit                |
| XP_009691677.1 | 0.000216539 | 0.216539   | 0.001        |             |            |              | 0.001     | conserved hypothetical protein         |
| XP_009691678.1 | 0.0303309   | 0.353      | 0.0859232    | 0.0300573   | 0.331342   | 0.0907139    | 0.088319  | T-complex protein 1 subunit            |
| XP_009691679.1 | 0.0932895   | 0.384568   | 0.242582     | 0.0822606   | 0.377302   | 0.218023     | 0.230302  | conserved hypothetical protein         |
| XP_009691680.1 | 0.047603    | 0.411084   | 0.115799     | 0.0334212   | 0.40976    | 0.0815629    | 0.098681  | uncharacterized protein                |
| XP_009691681.1 | 0.134748    | 0.495992   | 0.271673     | 0.108925    | 0.400151   | 0.272209     | 0.271941  | uncharacterized protein                |
| XP_009691682.1 | 0.184143    | 0.447204   | 0.411765     | 0.0959919   | 0.439737   | 0.218294     | 0.315029  | conserved hypothetical protein         |
| XP_009691683.1 | 0.0598213   | 0.381836   | 0.156668     | 0.0515959   | 0.334795   | 0.154112     | 0.15539   | uncharacterized protein                |
| XP_009691684.1 | 0.0600078   | 0.340926   | 0.176014     | 0.103833    | 0.545853   | 0.190222     | 0.183118  | conserved hypothetical protein         |
| XP_009691685.1 | 0.017585    | 0.675997   | 0.0260134    | 0.0143809   | 0.504305   | 0.0285162    | 0.027265  | chaperonin CPN60                       |
| XP_009691686.1 | 0.0230049   | 0.340353   | 0.0675913    |             |            |              | 0.0675913 | uncharacterized protein                |
| XP_009691687.1 | 0.0606749   | 0.425202   | 0.142697     | 0.0680356   | 0.390702   | 0.174137     | 0.158417  | uncharacterized protein                |
| XP_009691688.1 | 0.0650813   | 0.446942   | 0.145615     | 0.0478121   | 0.250441   | 0.190912     | 0.168264  | Fasciclin-2-like protein               |
| XP_009691689.1 | 0.0300638   | 0.594355   | 0.0505822    | 0.0156921   | 0.502601   | 0.0312217    | 0.040902  | DNA polymerase                         |
| XP_009691690.1 | 0.0196164   | 0.652025   | 0.0300854    | 0.0152413   | 0.459853   | 0.0331438    | 0.031615  | snRNP splicing factor U2AF             |
| XP_009691691.1 | 0.0605267   | 0.56689    | 0.10677      | 0.055608    | 0.521111   | 0.106711     | 0.106741  | phospholipase                          |
| XP_009691692.1 | 0.0406403   | 0.389539   | 0.104329     | 0.0241159   | 0.439494   | 0.054872     | 0.079601  | DNA-directed RNA polymerase D subunit  |
| XP_009691693.1 | 0.0544338   | 0.331047   | 0.164429     |             |            |              | 0.164429  | uncharacterized protein                |
| XP_009691695.1 | 0.110917    | 0.625728   | 0.177261     | 0.136707    | 0.645037   | 0.211936     | 0.194599  | conserved hypothetical protein         |
| XP_009691696.1 | 0.0693195   | 0.602259   | 0.115099     | 0.0750677   | 0.878186   | 0.0854804    | 0.10029   | conserved hypothetical protein         |
| XP_009691697.1 | 0.0328977   | 0.642108   | 0.051234     | 0.0316853   | 0.673462   | 0.0470483    | 0.049141  | ATP-dependent RNA helicase             |
| XP_009691698.1 | 0.0835789   | 0.460541   | 0.18148      | 0.0698688   | 0.351448   | 0.198803     | 0.190142  | translation initiation factor          |
| XP_009691699.1 | 0.0489439   | 0.538301   | 0.090923     | 0.0399385   | 0.680536   | 0.0586868    | 0.074805  | plastid 50S ribosomal protein L21      |
| XP_009691700.1 | 0.0382964   | 0.247113   | 0.154975     | 0.0292248   | 0.110836   | 0.263675     | 0.209325  | conserved hypothetical protein         |
| XP_009691701.1 | 0.0394744   | 0.332212   | 0.118823     | 0.0246719   | 0.40338    | 0.0611629    | 0.089993  | conserved hypothetical protein         |
| XP_009691702.1 | 0.111157    | 0.43046    | 0.258229     | 0.145577    | 0.510449   | 0.285195     | 0.271712  | conserved hypothetical protein         |
| XP_009691703.1 | 0.0275257   | 0.395321   | 0.0696286    | 0.0286183   | 0.206746   | 0.138422     | 0.104025  | Band 7-related protein                 |
| XP_009691704.1 | 0.00598728  | 1.01074    | 0.00592368   | 0.00504882  | 0.830456   | 0.00607957   | 0.006002  | DNA-directed RNA polymerase            |
| XP_009691705.1 | 0.0546964   | 0.434001   | 0.126028     | 0.0322896   | 0.45783    | 0.0705274    | 0.098278  | uncharacterized protein                |
| XP_009691706.1 | 0.0177417   | 0.42075    | 0.0421668    | 0.0187138   | 0.283661   | 0.0659724    | 0.05407   | T-complex protein 1 alpha subunit      |
| XP_009691707.1 | 0.120136    | 0.534923   | 0.224586     | 0.0904998   | 0.361876   | 0.250085     | 0.237336  | conserved hypothetical protein         |
| XP_009691708.1 | 0.150894    | 0.852551   | 0.176991     | 0.126845    | 0.771846   | 0.16434      | 0.170666  | conserved hypothetical protein         |
| XP_009691709.1 | 0.0570479   | 0.360701   | 0.158159     | 0.0551558   | 0.326196   | 0.169088     | 0.163623  | conserved hypothetical protein         |
| XP_009691710.1 | 0.150107    | 0.13201    | 1.13709      |             |            |              | 1.13709   | hypothetical protein                   |
| XP_009691711.1 | 0.0784953   | 0.588707   | 0.133335     | 0.0734446   | 0.681178   | 0.10782      | 0.120578  | ankyrin repeat containing protein      |
| XP_009691713.1 | 0.0430582   | 0.866979   | 0.0496646    | 0.0279694   | 0.614347   | 0.045527     | 0.047596  | adenyllyl-cyclase-associated protein   |
| XP_009691714.1 | 0.0710877   | 0.314693   | 0.225896     | 0.0647027   | 0.331341   | 0.195275     | 0.210586  | conserved hypothetical protein         |
| XP_009691715.1 | 0.0194707   | 0.237014   | 0.0821501    | 0.0213136   | 0.237804   | 0.0896266    | 0.085888  | conserved hypothetical protein         |
| XP_009691716.1 | 0.0562893   | 0.560064   | 0.100505     | 0.045919    | 0.483951   | 0.0948836    | 0.097694  | uncharacterized protein                |
| XP_009691717.1 | 0.0281335   | 0.434472   | 0.0647532    | 0.0317223   | 0.477436   | 0.0664431    | 0.065598  | uncharacterized protein                |
| XP_009691718.1 | 0.0896876   | 0.558249   | 0.160659     | 0.0886487   | 0.562898   | 0.157486     | 0.159073  | conserved hypothetical protein         |

| protein_id     | Chitose_ka | Chitose_ks | Chitose_kaks | Buffeli_ka  | Buffeli_ks | Buffeli_kaks | mean_kaks | function                       |
|----------------|------------|------------|--------------|-------------|------------|--------------|-----------|--------------------------------|
| XP_009691719.1 | 0.0820705  | 0.551884   | 0.14871      | 0.0692087   | 0.788396   | 0.0877843    | 0.118247  | conserved hypothetical protein |
| XP_009691720.1 | 0.0745166  | 0.615274   | 0.121111     | 0.0735074   | 0.785063   | 0.0936325    | 0.107372  | conserved hypothetical protein |
| XP_009691721.1 | 0.0605258  | 0.637925   | 0.0948792    | 0.0545855   | 0.552899   | 0.0987261    | 0.096803  | ABC transporter                |
| XP_009691722.1 | 0.109342   | 0.440525   | 0.248209     | 0.0663831   | 0.299256   | 0.221827     | 0.235018  | uncharacterized protein        |
| XP_009691723.1 | 0.533628   | 0.978297   | 0.545466     |             |            |              | 0.545466  | hypothetical protein           |
| XP_009691724.1 | 0.0626784  | 0.376716   | 0.166381     | 0.0690522   | 0.474893   | 0.145406     | 0.155894  | conserved hypothetical protein |
| XP_009691725.1 | 0.149804   | 0.148945   | 1.00577      | 0.138735    | 0.141911   | 0.977619     | 0.991695  | hypothetical protein           |
| XP_009691726.1 | 0.00237421 | 0.317922   | 0.00746791   | 0.00456417  | 0.303168   | 0.0150549    | 0.011261  | 60S ribosomal protein L19      |
| XP_009691727.1 | 0.0431212  | 0.390838   | 0.11033      | 0.0347803   | 0.196808   | 0.176722     | 0.143526  | endonuclease III               |
| XP_009691728.1 | 0.0862848  | 0.238415   | 0.361909     | 0.0807066   | 0.350537   | 0.230237     | 0.296073  | conserved hypothetical protein |
| XP_009691731.1 | 0.0632042  | 0.368365   | 0.171581     | 0.051987    | 0.250254   | 0.207737     | 0.189659  | conserved hypothetical protein |
| XP_009691732.1 | 0.0807584  | 0.541258   | 0.149205     | 0.0480653   | 0.288344   | 0.166694     | 0.15795   | conserved hypothetical protein |
| XP_009691733.1 | 0.0394449  | 0.313766   | 0.125714     | 0.0162526   | 0.12714    | 0.127833     | 0.126773  | conserved hypothetical protein |
| XP_009691734.1 | 0.0592101  | 0.516663   | 0.114601     | 0.0624158   | 0.639909   | 0.0975385    | 0.10607   | conserved hypothetical protein |
| XP_009691735.1 | 0.110387   | 0.801682   | 0.137694     | 0.14772     | 0.660538   | 0.223635     | 0.180665  | conserved hypothetical protein |
| XP_009691736.1 | 0.114137   | 0.760214   | 0.150137     | 0.106367    | 0.541964   | 0.196263     | 0.1732    | conserved hypothetical protein |
| XP_009691737.1 | 0.00350606 | 0.337451   | 0.0103898    | 0.00433167  | 0.293801   | 0.0147436    | 0.012567  | histone H3                     |
| XP_009691738.1 | 0.170258   | 0.334262   | 0.509354     | 0.025756    | 0.0568171  | 0.453314     | 0.481334  | hypothetical protein           |
| XP_009691739.1 | 0.0675398  | 0.916564   | 0.073688     | 0.041276    | 0.695988   | 0.0593056    | 0.066497  | conserved hypothetical protein |
| XP_009691740.1 | 0.027344   | 0.366678   | 0.0745722    |             |            |              | 0.0745722 | conserved hypothetical protein |
| XP_009691741.1 | 0.10731    | 0.596652   | 0.179853     | 0.0991462   | 0.521635   | 0.190068     | 0.18496   | conserved hypothetical protein |
| XP_009691742.1 | 0.120556   | 0.335041   | 0.359823     | 0.0818252   | 0.318139   | 0.2572       | 0.308511  | uncharacterized protein        |
| XP_009691743.1 | 0.0111089  | 0.860101   | 0.0129158    | 0.0121235   | 0.783992   | 0.0154638    | 0.01419   | conserved hypothetical protein |
| XP_009691744.1 | 0.0267709  | 0.704834   | 0.0379818    | 0.0200197   | 0.631285   | 0.0317127    | 0.034847  | alpha adaptin                  |
| XP_009691745.1 | 0.0290682  | 0.385719   | 0.0753611    | 0.0397036   | 0.302177   | 0.131392     | 0.103377  | synaptobrevin                  |
| XP_009691746.1 | 0.0601328  | 0.613541   | 0.0980093    | 0.0608373   | 0.665599   | 0.0914023    | 0.094706  | conserved hypothetical protein |
| XP_009691747.1 | 0.0901421  | 0.301931   | 0.298552     | 0.0713211   | 0.213331   | 0.334321     | 0.316437  | uncharacterized protein        |
| XP_009691748.1 | 0.0290068  | 0.387105   | 0.0749325    | 0.0205502   | 0.279055   | 0.0736423    | 0.074287  | arsenical pump-driving ATPase  |
| XP_009691749.1 | 0.0429977  | 0.351265   | 0.122408     |             |            |              | 0.122408  | uncharacterized protein        |
| XP_009691750.1 | 0.0671934  | 0.805161   | 0.0834533    | 0.0523376   | 0.796531   | 0.065707     | 0.07458   | protein kinase                 |
| XP_009691751.1 | 0.06819    | 0.498146   | 0.136888     | 0.0621598   | 0.30443    | 0.204184     | 0.170536  | conserved hypothetical protein |
| XP_009691752.1 | 0.043752   | 0.772054   | 0.0566697    | 0.0454406   | 0.71177    | 0.0638417    | 0.060256  | methionyl-tRNA synthetase      |
| XP_009691753.1 | 0.104515   | 0.395194   | 0.264465     | 0.116242    | 0.368194   | 0.315709     | 0.290087  | conserved hypothetical protein |
| XP_009691756.1 | NA         | NA         | NA           |             |            |              | NA        | hypothetical protein           |
| XP_009691757.1 |            |            |              | 0.0940492   | 0.328395   | 0.286391     | 0.286391  | uncharacterized protein        |
| XP_009691759.1 | 0.034512   | 0.471594   | 0.0731818    |             |            |              | 0.0731818 | conserved hypothetical protein |
| XP_009691760.1 | 0.0651649  | 0.387157   | 0.168316     | 0.0589552   | 0.395438   | 0.149088     | 0.158702  | conserved hypothetical protein |
| XP_009691762.1 | 0.0993301  | 0.556852   | 0.178378     | 0.0906855   | 0.509259   | 0.178074     | 0.178226  | conserved hypothetical protein |
| XP_009691766.1 | 0.047012   | 1.54562    | 0.0304163    | 0.0401942   | 1.15567    | 0.0347801    | 0.032598  | uncharacterized protein        |
| XP_009691767.1 | 0.116726   | 0.566959   | 0.20588      | 0.119052    | 0.570479   | 0.208688     | 0.207284  | uncharacterized protein        |
| XP_009691769.1 | 0.105061   | 0.989809   | 0.106142     |             |            |              | 0.106142  | uncharacterized protein        |
| XP_009691770.1 | 0.134548   | 0.419006   | 0.321113     | 0.133085    | 0.334572   | 0.397777     | 0.359445  | conserved hypothetical protein |
| XP_009691771.1 | 0.0587479  | 0.412976   | 0.142255     | 0.0474347   | 0.341271   | 0.138994     | 0.140624  | uncharacterized protein        |
| XP_009691772.1 | 0.0470462  | 0.44044    | 0.106816     | 0.0438303   | 0.309119   | 0.141791     | 0.124303  | thioredoxin reductase          |
| XP_009691773.1 | 0.0793264  | 0.487256   | 0.162802     | 0.0653702   | 0.501837   | 0.130262     | 0.146532  | conserved hypothetical protein |
| XP_009691774.1 | 0.065786   | 0.239145   | 0.275088     | 4.46907E-05 | 0.0446907  | 0.001        | 0.138044  | hypothetical protein           |
| XP_009691775.1 | 0.107427   | 0.3998     | 0.268702     |             |            |              | 0.268702  | conserved hypothetical protein |
| XP_009691776.1 | 0.0477771  | 0.684129   | 0.0698364    | 0.0440643   | 0.479812   | 0.0918365    | 0.080836  | conserved hypothetical protein |
| XP_009691777.1 | 0.0702859  | 0.273763   | 0.25674      | 0.0834629   | 0.131535   | 0.634532     | 0.445636  | uncharacterized protein        |
| XP_009691778.1 | 0.0104444  | 0.33808    | 0.0308932    |             |            |              | 0.0308932 | ADP-ribosylation factor        |
| XP_009691779.1 | 0.0844881  | 0.747801   | 0.112982     | 0.0488124   | 0.517486   | 0.0943261    | 0.103654  | conserved hypothetical protein |
| XP_009691780.1 | 0.0759135  | 0.524033   | 0.144864     | 0.072665    | 0.476088   | 0.152629     | 0.148747  | conserved hypothetical protein |
| XP_009691781.1 | 0.105037   | 0.733003   | 0.143296     | 0.116535    | 0.653778   | 0.178249     | 0.160772  | conserved hypothetical protein |

| protein_id     | Chitose_ka | Chitose_ks | Chitose_kaks | Buffeli_ka | Buffeli_ks | Buffeli_kaks | mean_kaks | function                                                             |
|----------------|------------|------------|--------------|------------|------------|--------------|-----------|----------------------------------------------------------------------|
| XP_009691782.1 | 0.0549368  | 0.333067   | 0.164942     | 0.0457741  | 0.575663   | 0.0795153    | 0.122229  | hypothetical protein                                                 |
| XP_009691783.1 | 0.120823   | 0.579551   | 0.208477     | 0.121217   | 0.501684   | 0.24162      | 0.225048  | conserved hypothetical protein                                       |
| XP_009691784.1 | 0.0916719  | 0.459757   | 0.199392     | 0.0708553  | 0.367167   | 0.192978     | 0.196185  | conserved hypothetical protein                                       |
| XP_009691786.1 | 0.0260796  | 0.593982   | 0.0439064    | 0.0244457  | 0.512401   | 0.0477082    | 0.045807  | 2-oxoglutarate dehydrogenase E1 component                            |
| XP_009691787.1 | 0.138034   | 0.365643   | 0.37751      | 0.16496    | 0.451969   | 0.364981     | 0.371246  | hypothetical protein                                                 |
| XP_009691789.1 | 0.1354     | 0.443311   | 0.30543      | 0.148049   | 0.324625   | 0.45606      | 0.380745  | hypothetical protein                                                 |
| XP_009691792.1 | 0.0772171  | 0.474931   | 0.162586     | 0.0240703  | 0.122139   | 0.197073     | 0.17983   | uncharacterized protein                                              |
| XP_009691794.1 | 0.00984309 | 0.583665   | 0.0168643    | 0.0109335  | 0.819308   | 0.0133449    | 0.015105  | uncharacterized protein                                              |
| XP_009691795.1 | 0.0516428  | 0.667177   | 0.0774049    | 0.0401751  | 0.414902   | 0.0968304    | 0.087118  | uncharacterized protein                                              |
| XP_009691796.1 | 0.0952349  | 0.442943   | 0.215005     | 0.109762   | 0.433876   | 0.252979     | 0.233992  | conserved hypothetical protein                                       |
| XP_009691797.1 | 0.0745413  | 0.0939489  | 0.793423     |            |            |              | 0.793423  | hypothetical protein                                                 |
| XP_009691798.1 | 0.114662   | 0.560058   | 0.204733     | 0.0947318  | 0.438428   | 0.216072     | 0.210402  | uncharacterized protein                                              |
| XP_009691799.1 | 0.00776069 | 0.0991248  | 0.0782921    |            |            |              | 0.0782921 | conserved hypothetical protein                                       |
| XP_009691800.1 | 0.0340757  | 0.111188   | 0.30647      |            |            |              | 0.30647   | hypothetical protein                                                 |
| XP_009691801.1 | 0.158515   | 0.465771   | 0.340328     |            |            |              | 0.340328  | hypothetical protein                                                 |
| XP_009691802.1 | 0.0787776  | 0.884082   | 0.0891066    | 0.0905351  | 1.04822    | 0.0863701    | 0.087738  | uncharacterized protein                                              |
| XP_009691803.1 | 0.0812122  | 0.690812   | 0.11756      | 0.0626676  | 0.455473   | 0.137588     | 0.127574  | uncharacterized protein                                              |
| XP_009691804.1 | 0.0257849  | 0.437656   | 0.0589158    | 0.0293527  | 0.392418   | 0.0747994    | 0.066858  | conserved hypothetical protein                                       |
| XP_009691805.1 | 0.0217392  | 0.153137   | 0.14196      | 0.0167693  | 0.216769   | 0.0773599    | 0.10966   | 4-methyl-5(b-hydroxyethyl)-thiazol monophosphate biosynthesis enzyme |
| XP_009691807.1 | 0.0697614  | 0.857904   | 0.0813161    | 0.0119116  | 0.0189076  | 0.629994     | 0.355655  | conserved hypothetical protein                                       |
| XP_009691808.1 | 0.0272476  | 0.58547    | 0.0465397    | 0.0146374  | 0.644311   | 0.0227179    | 0.034629  | uncharacterized protein                                              |
| XP_009691809.1 | 0.0376606  | 0.344499   | 0.10932      | 0.0253261  | 0.283869   | 0.0892177    | 0.099269  | uncharacterized protein                                              |
| XP_009691810.1 | 0.0884741  | 0.869001   | 0.101811     | 0.0813483  | 1.00331    | 0.08108      | 0.091445  | conserved hypothetical protein                                       |
| XP_009691811.1 | 0.0530745  | 0.370975   | 0.143067     | 0.0286827  | 0.187339   | 0.153106     | 0.148087  | cytochrome reductase                                                 |
| XP_009691812.1 | 0.0541936  | 0.551018   | 0.0983516    | 0.0426648  | 0.450589   | 0.0946869    | 0.096519  | conserved hypothetical protein                                       |
| XP_009691813.1 | 0.106708   | 0.452515   | 0.235812     | 0.102054   | 0.372927   | 0.273656     | 0.254734  | uncharacterized protein                                              |
| XP_009691814.1 | 0.0081525  | 0.199617   | 0.0408408    |            |            |              | 0.0408408 | predicted protein                                                    |
| XP_009691815.1 | 0.0574221  | 0.4423     | 0.129826     | 0.0557757  | 0.634114   | 0.0879585    | 0.108892  | uncharacterized protein                                              |
| XP_009691816.1 | 0.032435   | 0.554561   | 0.0584877    | 0.0484472  | 0.523329   | 0.0925751    | 0.075531  | uncharacterized protein                                              |
| XP_009691817.1 | 0.0933892  | 0.570045   | 0.163828     | 0.112672   | 0.520231   | 0.216581     | 0.190204  | uncharacterized protein                                              |
| XP_009691818.1 | 0.0955837  | 0.389504   | 0.245398     | 0.100902   | 0.415532   | 0.242826     | 0.244112  | uncharacterized protein                                              |
| XP_009691819.1 | 0.0664843  | 0.409234   | 0.16246      | 0.0764162  | 0.399021   | 0.191509     | 0.176984  | conserved hypothetical protein                                       |
| XP_009691820.1 | 0.0644541  | 0.456725   | 0.141122     | 0.0595263  | 0.50111    | 0.118789     | 0.129956  | conserved hypothetical protein                                       |
| XP_009691821.1 | 0.105715   | 0.587786   | 0.179852     | 0.066442   | 0.609118   | 0.109079     | 0.144465  | conserved hypothetical protein                                       |
| XP_009691822.1 | 0.0217337  | 0.660693   | 0.0328953    | 0.0237536  | 0.395589   | 0.0600462    | 0.046471  | fumarate hydratase class I                                           |
| XP_009691824.1 | 0.162283   | 0.478665   | 0.339032     |            |            |              | 0.339032  | uncharacterized protein                                              |
| XP_009691825.1 | 0.0790489  | 0.629747   | 0.125525     |            |            |              | 0.125525  | uncharacterized protein                                              |
| XP_009691826.1 | 0.00938605 | 0.542904   | 0.0172886    | 0.00862876 | 0.414082   | 0.0208383    | 0.019063  | conserved hypothetical protein                                       |
| XP_009691827.1 | 0.17262    | 0.466317   | 0.370177     | 0.151888   | 0.475712   | 0.319286     | 0.344731  | conserved hypothetical protein                                       |
| XP_009691828.1 | 0.0510049  | 0.596708   | 0.0854772    | 0.0305623  | 0.638058   | 0.0478989    | 0.066688  | conserved hypothetical protein                                       |
| XP_009691829.1 | 0.0338072  | 0.507585   | 0.0666041    | 0.0334185  | 0.276337   | 0.120934     | 0.093769  | conserved hypothetical protein                                       |
| XP_009691830.1 | 0.0323142  | 0.435359   | 0.0742244    | 0.026355   | 0.459422   | 0.0573655    | 0.065795  | uncharacterized protein                                              |
| XP_009691831.1 | 0.0455318  | 0.495215   | 0.0919435    | 0.0295185  | 0.231626   | 0.127441     | 0.109692  | conserved hypothetical protein                                       |
| XP_009691832.1 | 0.0785304  | 0.54949    | 0.142915     | 0.0738653  | 0.434261   | 0.170094     | 0.156504  | conserved hypothetical protein                                       |
| XP_009691833.1 | 0.0380478  | 0.505532   | 0.0752629    | 0.00913565 | 0.451286   | 0.0202436    | 0.047753  | CCR4-NOT transcription complex subunit 3                             |
| XP_009691834.1 | 0.0736882  | 0.0976407  | 0.754688     |            |            |              | 0.754688  | conserved hypothetical protein                                       |
| XP_009691835.1 | 0.0256146  | 0.271609   | 0.0943069    | 0.0072693  | 0.226631   | 0.0320755    | 0.063191  | uncharacterized protein                                              |
| XP_009691836.1 | 0.0897801  | 0.321511   | 0.279244     | 0.0726698  | 0.281375   | 0.258267     | 0.268756  | uncharacterized protein                                              |
| XP_009691837.1 | 0.0283219  | 0.843171   | 0.0335898    | 0.0181592  | 0.297336   | 0.0610729    | 0.047331  | cysteinyl-tRNA synthetase                                            |
| XP_009691838.1 | 0.0586704  | 0.629306   | 0.0932302    | 0.0355928  | 0.407853   | 0.0872685    | 0.090249  | conserved hypothetical protein                                       |
| XP_009691840.1 | 0.0449554  | 0.394878   | 0.113846     | 0.0250461  | 0.421426   | 0.0594318    | 0.086639  | hexose transporter                                                   |
| XP_009691842.1 | 0.020781   | 0.528459   | 0.0393237    | 0.0234481  | 0.46153    | 0.0508052    | 0.045064  | uncharacterized protein                                              |
| XP_009691843.1 | 0.113267   | 0.672278   | 0.168483     | 0.100658   | 0.638482   | 0.157652     | 0.163067  | conserved hypothetical protein                                       |

| protein_id     | Chitose_ka  | Chitose_ks | Chitose_kaks | Buffeli_ka  | Buffeli_ks | Buffeli_kaks | mean_kaks | function                                                     |
|----------------|-------------|------------|--------------|-------------|------------|--------------|-----------|--------------------------------------------------------------|
| XP_009691844.1 | 0.0982172   | 1.01717    | 0.0965592    | 0.102811    | 0.774601   | 0.132728     | 0.114644  | predicted protein                                            |
| XP_009691845.1 | 0.00513564  | 0.245523   | 0.0209172    | 0.00287719  | 0.200193   | 0.0143721    | 0.017645  | centrin                                                      |
| XP_009691846.1 | 0.0662972   | 0.328819   | 0.201622     | 0.0530119   | 0.264695   | 0.200276     | 0.200949  | 2-C-methyl-D-erythritol 4-phosphate cytidyltransferase       |
| XP_009691847.1 | 0.0192406   | 0.33862    | 0.0568206    | 0.0200497   | 0.313327   | 0.0639898    | 0.060405  | aspartyl protease precursor                                  |
| XP_009691848.1 | 0.0471773   | 0.578072   | 0.0816115    | 0.0484226   | 0.465567   | 0.104008     | 0.09281   | conserved hypothetical protein                               |
| XP_009691849.1 | 0.143966    | 0.469286   | 0.306776     | 0.0379301   | 0.143144   | 0.264979     | 0.285878  | conserved hypothetical protein                               |
| XP_009691850.1 | 0.017925    | 0.624337   | 0.0287105    | 0.0218681   | 0.43889    | 0.0498258    | 0.039268  | uncharacterized protein                                      |
| XP_009691851.1 | 0.000433739 | 0.433739   | 0.001        | 0.000362515 | 0.362515   | 0.001        | 0.001     | 40S ribosomal protein S27                                    |
| XP_009691852.1 | 0.072033    | 1.07847    | 0.0667917    | 0.0524209   | 0.793628   | 0.0660523    | 0.066422  | conserved hypothetical protein                               |
| XP_009691855.1 | 0.00387536  | 0.322364   | 0.0120217    | 0.000286843 | 0.286843   | 0.001        | 0.006511  | 60S ribosomal protein L24                                    |
| XP_009691856.1 | 0.0360409   | 0.940012   | 0.0383409    | 0.0303255   | 0.660022   | 0.0459463    | 0.042144  | uncharacterized protein                                      |
| XP_009691857.1 | 0.0231503   | 1.00218    | 0.0230999    | 0.0204804   | 0.722538   | 0.0283451    | 0.025723  | carbamoyl phosphate synthase II                              |
| XP_009691858.1 | 0.139438    | 0.195662   | 0.712644     | 0.166373    | 0.113082   | 1.47127      | 1.091957  | hypothetical protein                                         |
| XP_009691859.1 | 0.171215    | 0.242172   | 0.706997     | 0.0566222   | 0.0236481  | 2.39437      | 1.550683  | hypothetical protein                                         |
| XP_009691860.1 | 0.0181256   | 0.85668    | 0.0211579    | 0.010075    | 0.604241   | 0.0166739    | 0.018916  | glycogen synthase kinase                                     |
| XP_009691861.1 | 0.0569639   | 0.611551   | 0.0931467    | 0.028546    | 0.465455   | 0.0613292    | 0.077238  | 26S proteasome regulatory subunit                            |
| XP_009691863.1 | 0.0823827   | 0.643838   | 0.127956     | 0.0521208   | 0.401932   | 0.129676     | 0.128816  | conserved hypothetical protein                               |
| XP_009691864.1 | 0.0782761   | 0.493546   | 0.158599     | 0.0713874   | 0.418322   | 0.170652     | 0.164625  | uncharacterized protein                                      |
| XP_009691865.1 | 0.126035    | 0.57815    | 0.217997     | 0.0457338   | 0.315533   | 0.144941     | 0.181469  | hypothetical protein                                         |
| XP_009691866.1 | 0.0339146   | 0.42037    | 0.080678     | 0.0317442   | 0.370487   | 0.0856825    | 0.08318   | conserved hypothetical protein                               |
| XP_009691867.1 | 0.114253    | 0.636697   | 0.179446     | 0.112267    | 0.357534   | 0.314005     | 0.246725  | hypothetical protein                                         |
| XP_009691872.1 | 0.0836461   | 0.498061   | 0.167944     |             |            |              | 0.167944  | uncharacterized protein                                      |
| XP_009691875.1 | 0.0590583   | 0.618279   | 0.0955205    | 0.075243    | 0.850591   | 0.0884597    | 0.09199   | U1 snRNP protein                                             |
| XP_009691876.1 | 0.0739929   | 1.29616    | 0.0570862    | 0.0433001   | 0.280663   | 0.154278     | 0.105682  | uncharacterized protein                                      |
| XP_009691877.1 | 0.0398317   | 0.742894   | 0.053617     |             |            |              | 0.053617  | vacuolar ATP synthase subunit H                              |
| XP_009691881.1 | 0.0725293   | 0.566556   | 0.128018     | 0.0501298   | 0.498231   | 0.100616     | 0.114317  | conserved hypothetical protein                               |
| XP_009691882.1 | 0.072616    | 0.355579   | 0.204219     |             |            |              | 0.204219  | conserved hypothetical protein                               |
| XP_009691883.1 | 0.055349    | 1.25659    | 0.044047     | 0.0222325   | 0.195766   | 0.113567     | 0.078807  | conserved hypothetical protein                               |
| XP_009691884.1 | 0.0486587   | 0.430337   | 0.113071     |             |            |              | 0.113071  | conserved hypothetical protein                               |
| XP_009691885.1 | 0.10821     | 0.768763   | 0.140758     |             |            |              | 0.140758  | uncharacterized protein                                      |
| XP_009691887.1 | 0.038867    | 1.07356    | 0.0362039    | 0.0424203   | 4.39924    | 0.00964264   | 0.022923  | conserved hypothetical protein                               |
| XP_009691888.1 | 0.0607586   | 0.507273   | 0.119775     | 0.0619567   | 0.527222   | 0.117515     | 0.118645  | conserved hypothetical protein                               |
| XP_009691889.1 | NA          | NA         | NA           |             |            |              | NA        | DNA-directed RNA polymerase II                               |
| XP_009691890.1 | 0.0611905   | 0.499513   | 0.1225       | 0.058288    | 0.346325   | 0.168304     | 0.145402  | RNA polymerase II carboxyterminal domain phosphatase         |
| XP_009691891.1 | 0.0149917   | 0.269352   | 0.0556584    |             |            |              | 0.0556584 | ubiquitin-conjugating enzyme                                 |
| XP_009691892.1 | 0.18029     | 0.785033   | 0.229659     | 0.0966575   | 0.448681   | 0.215426     | 0.222543  | hypothetical protein                                         |
| XP_009691893.1 | 0.133845    | 0.518309   | 0.258233     | 0.14967     | 0.518333   | 0.288752     | 0.273493  | conserved hypothetical protein                               |
| XP_009691894.1 | 0.123832    | 0.606062   | 0.204322     | 0.12243     | 0.53114    | 0.230505     | 0.217413  | conserved hypothetical protein                               |
| XP_009691895.1 | 0.000266831 | 0.266831   | 0.001        |             |            |              | 0.001     | methyltransferase                                            |
| XP_009691896.1 | 0.0749871   | 0.399381   | 0.187759     |             |            |              | 0.187759  | endonuclease                                                 |
| XP_009691897.1 | 0.118884    | 0.368095   | 0.322972     | 0.085327    | 0.377793   | 0.225856     | 0.274414  | uncharacterized protein                                      |
| XP_009691898.1 | 0.182157    | 0.587264   | 0.310178     | 0.158926    | 0.383824   | 0.41406      | 0.362119  | hypothetical protein                                         |
| XP_009691899.1 | 0.0363174   | 0.568476   | 0.0638855    |             |            |              | 0.0638855 | conserved hypothetical protein                               |
| XP_009691900.1 | 0.0380837   | 0.338545   | 0.112492     | 0.0397465   | 0.222629   | 0.178532     | 0.145512  | putative RPC10 subunit of RNA polymerases I%2C II%2C and III |
| XP_009691901.1 | 0.0326123   | 0.565269   | 0.0576935    | 0.0166646   | 0.354096   | 0.0470624    | 0.052378  | conserved hypothetical protein                               |
| XP_009691902.1 | 0.0454973   | 0.404071   | 0.112597     | 0.0380108   | 0.178549   | 0.212887     | 0.162742  | uncharacterized protein                                      |
| XP_009691903.1 | 0.0518277   | 0.348053   | 0.148907     | 0.0622565   | 0.498818   | 0.124808     | 0.136858  | uncharacterized protein                                      |
| XP_009691904.1 | 0.0461723   | 0.478551   | 0.0964836    | NA          | NA         | NA           | NA        | 50S ribosomal protein L17                                    |
| XP_009691905.1 | 0.0427137   | 0.506104   | 0.0843971    | 0.0184512   | 0.30214    | 0.0610683    | 0.072733  | ribosomal protein L15                                        |
| XP_009691908.1 | 0.106929    | 0.857395   | 0.124714     | 0.112625    | 0.619253   | 0.181873     | 0.153293  | uncharacterized protein                                      |
| XP_009691909.1 | 0.101289    | 0.326619   | 0.310113     | 0.110462    | 0.306059   | 0.360916     | 0.335515  | uncharacterized protein                                      |
| XP_009691910.1 | 0.20878     | 0.441745   | 0.472625     | 0.178352    | 0.448398   | 0.397753     | 0.435189  | conserved hypothetical protein                               |
| XP_009691911.1 | 0.133938    | 0.372403   | 0.359658     | 0.115957    | 0.342869   | 0.338195     | 0.348927  | uncharacterized protein                                      |

| protein_id     | Chitose_ka  | Chitose_ks | Chitose_kaks | Buffeli_ka  | Buffeli_ks | Buffeli_kaks | mean_kaks | function                               |
|----------------|-------------|------------|--------------|-------------|------------|--------------|-----------|----------------------------------------|
| XP_009691912.1 |             |            |              | 0.0843059   | 0.279165   | 0.301993     | 0.301993  | conserved hypothetical protein         |
| XP_009691913.1 | 0.161993    | 0.497983   | 0.325298     | 0.0826081   | 0.610974   | 0.135207     | 0.230252  | hypothetical protein                   |
| XP_009691914.1 | 0.122953    | 0.943074   | 0.130375     | 0.130511    | 0.616171   | 0.211809     | 0.171092  | conserved hypothetical protein         |
| XP_009691915.1 | 0.159014    | 0.756922   | 0.210079     | 0.1694      | 0.7084     | 0.23913      | 0.224604  | conserved hypothetical protein         |
| XP_009691916.1 | 0.0889268   | 0.762217   | 0.116669     | 0.0853756   | 0.767404   | 0.111253     | 0.113961  | uncharacterized protein                |
| XP_009691917.1 | 0.104094    | 0.715435   | 0.145497     | 0.103366    | 0.741697   | 0.139364     | 0.14243   | conserved hypothetical protein         |
| XP_009691918.1 | 0.0606161   | 0.186609   | 0.324829     |             |            |              | 0.324829  | conserved hypothetical protein         |
| XP_009691922.1 | 0.0925466   | 0.308949   | 0.299553     | 0.114       | 0.26608    | 0.428442     | 0.363997  | conserved hypothetical protein         |
| XP_009691923.1 |             |            |              | 0.168069    | 0.198266   | 0.847693     | 0.847693  | hypothetical protein                   |
| XP_009691924.1 |             |            |              | 0.087143    | 0.107164   | 0.813176     | 0.813176  | hypothetical protein                   |
| XP_009691925.1 |             |            |              | 0.0666116   | 0.162461   | 0.410015     | 0.410015  | conserved hypothetical protein         |
| XP_009691926.1 |             |            |              | 0.0219368   | 0.101557   | 0.216005     | 0.216005  | ABC transporter                        |
| XP_009691941.1 | 0.115412    | 0.726311   | 0.158901     | 0.111344    | 0.688651   | 0.161684     | 0.160293  | conserved hypothetical protein         |
| XP_009691944.1 | 0.0695638   | 0.619743   | 0.112246     | 0.0541367   | 0.295499   | 0.183204     | 0.147725  | conserved hypothetical protein         |
| XP_009691945.1 | 0.0878897   | 0.304287   | 0.288838     | 0.111441    | 0.251436   | 0.443219     | 0.366028  | hypothetical protein                   |
| XP_009691946.1 | 0.0463305   | 0.605636   | 0.0764988    | 0.0418983   | 0.589341   | 0.0710935    | 0.073796  | uncharacterized protein                |
| XP_009691947.1 | 0.0137095   | 0.478379   | 0.0286583    | 0.0124848   | 0.454743   | 0.0274546    | 0.028056  | ubiquinol-cytochrome c reductase       |
| XP_009691948.1 | 0.0376765   | 0.411714   | 0.0915113    | 0.0550185   | 0.472277   | 0.116496     | 0.104004  | uncharacterized protein                |
| XP_009691949.1 | 0.00462404  | 0.329109   | 0.0140502    | 0.000226997 | 0.226997   | 0.001        | 0.007525  | DNA-directed RNA polymerase            |
| XP_009691950.1 | 0.064511    | 0.678915   | 0.0950208    | 0.072554    | 0.616139   | 0.117756     | 0.106388  | conserved hypothetical protein         |
| XP_009691951.1 | 0.0157238   | 0.334842   | 0.0469589    | 0.0153268   | 0.288594   | 0.0531085    | 0.050034  | ribosomal protein S17                  |
| XP_009691952.1 | 0.0304467   | 0.284448   | 0.107038     | 0.00993568  | 0.20535    | 0.0483842    | 0.077711  | conserved hypothetical protein         |
| XP_009691953.1 | 0.0383178   | 0.669863   | 0.0572024    | 0.05581     | 0.591408   | 0.094368     | 0.075785  | importin alpha                         |
| XP_009691954.1 | 0.0585026   | 0.88353    | 0.0662146    | 0.0532817   | 0.782981   | 0.0680498    | 0.067132  | uncharacterized protein                |
| XP_009691955.1 | 0.00722304  | 0.665006   | 0.0108616    | 0.00757405  | 0.582112   | 0.0130113    | 0.011936  | ubiquitin carrier protein              |
| XP_009691956.1 | 0.0867061   | 0.415249   | 0.208805     | 0.061765    | 0.383625   | 0.161004     | 0.184904  | uncharacterized protein                |
| XP_009691957.1 | 0.0731082   | 0.147863   | 0.494432     |             |            |              | 0.494432  | hypothetical protein                   |
| XP_009691958.1 | 0.104459    | 0.562726   | 0.18563      | 0.0957354   | 0.479885   | 0.199496     | 0.192563  | hypothetical protein                   |
| XP_009691959.1 | 0.0824207   | 0.414572   | 0.198809     | 0.0719829   | 0.543725   | 0.132388     | 0.165599  | conserved hypothetical protein         |
| XP_009691960.1 | 0.0362283   | 0.377576   | 0.0959496    | 0.0366941   | 0.385854   | 0.0950985    | 0.095524  | conserved hypothetical protein         |
| XP_009691961.1 | 0.0530841   | 0.325146   | 0.163262     | 0.0476346   | 0.325458   | 0.146362     | 0.154812  | phosphoinositide binding protein       |
| XP_009691962.1 | 0.100708    | 0.430641   | 0.233856     | 0.112825    | 0.562039   | 0.200743     | 0.2173    | uncharacterized protein                |
| XP_009691963.1 | 0.102431    | 0.730962   | 0.140132     | 0.103619    | 0.647612   | 0.160001     | 0.150066  | conserved hypothetical protein         |
| XP_009691964.1 | NA          | NA         | NA           | NA          | NA         | NA           | NA        | hypothetical protein                   |
| XP_009691966.1 | 0.0209824   | 0.213167   | 0.0984321    |             |            |              | 0.0984321 | uncharacterized protein                |
| XP_009691967.1 | 0.0526348   | 0.129474   | 0.406527     | 0.062338    | 0.183764   | 0.339228     | 0.372877  | uncharacterized protein                |
| XP_009691968.1 | 0.0681985   | 0.523915   | 0.130171     |             |            |              | 0.130171  | uncharacterized protein                |
| XP_009691969.1 | 0.0258612   | 0.358819   | 0.072073     | 0.0240876   | 0.668099   | 0.0360539    | 0.054063  | S-adenosylmethionine synthetase        |
| XP_009691970.1 | 0.000051824 | 0.051824   | 0.001        |             |            |              | 0.001     | high-mobility group protein            |
| XP_009691972.1 | 0.016306    | 0.272182   | 0.0599085    | 0.0107581   | 0.169584   | 0.0634382    | 0.061673  | uncharacterized protein                |
| XP_009691973.1 | 0.0834728   | 0.502727   | 0.16604      | 0.0867706   | 0.548802   | 0.158109     | 0.162075  | uncharacterized protein                |
| XP_009691974.1 | 0.0416716   | 0.681406   | 0.0611553    | 0.043829    | 0.870459   | 0.0503516    | 0.055753  | uncharacterized protein                |
| XP_009691975.1 | 0.0508999   | 0.456849   | 0.111415     | 0.0508626   | 0.416545   | 0.122106     | 0.116761  | conserved hypothetical protein         |
| XP_009691976.1 | 0.0786265   | 0.54784    | 0.143521     | 0.0688916   | 0.470609   | 0.146388     | 0.144954  | uncharacterized protein                |
| XP_009691977.1 | 0.0275614   | 1.34274    | 0.0205263    | 0.0288229   | 1.19631    | 0.0240932    | 0.02231   | glutamate dehydrogenase                |
| XP_009691978.1 | 0.047118    | 0.524045   | 0.089912     | 0.0501347   | 0.476374   | 0.105242     | 0.097577  | dihydroorotase                         |
| XP_009691979.1 | 0.0867141   | 0.496656   | 0.174596     | 0.0636205   | 0.445224   | 0.142896     | 0.158746  | uncharacterized protein                |
| XP_009691980.1 | 0.0365378   | 0.533495   | 0.0684876    | 0.0393371   | 0.555003   | 0.0708772    | 0.069682  | serine/threonine protein kinase        |
| XP_009691981.1 | 0.0546706   | 0.399328   | 0.136907     | 0.0572727   | 0.415681   | 0.13778      | 0.137344  | uncharacterized protein                |
| XP_009691982.1 | 0.0537259   | 0.313649   | 0.171293     | 0.0504695   | 0.477348   | 0.105729     | 0.138511  | ubiquitin-like protease                |
| XP_009691983.1 | 0.0602223   | 0.871479   | 0.0691036    | 0.0617664   | 0.939006   | 0.0657785    | 0.067441  | likely GTP/GDP exchange factor for ARF |
| XP_009691984.1 | 0.0623504   | 0.280175   | 0.222541     | 0.0475445   | 0.174439   | 0.272557     | 0.247549  | uncharacterized protein                |
| XP_009691985.1 | 0.0272019   | 0.0210544  | 1.29198      |             |            |              | 1.29198   | hypothetical protein                   |

| protein_id     | Chitose_ka  | Chitose_ks | Chitose_kaks | Buffeli_ka  | Buffeli_ks | Buffeli_kaks | mean_kaks | function                                                |
|----------------|-------------|------------|--------------|-------------|------------|--------------|-----------|---------------------------------------------------------|
| XP_009691986.1 | 0.0762472   | 0.472774   | 0.161276     | 0.0648364   | 0.468846   | 0.138289     | 0.149782  | conserved hypothetical protein                          |
| XP_009691987.1 | 0.042821    | 0.43572    | 0.0982762    | 0.0307205   | 0.42824    | 0.0717367    | 0.085006  | phenylalanyl-tRNA synthetase                            |
| XP_009691988.1 | 0.0649099   | 0.727232   | 0.089256     | 0.0496559   | 0.649842   | 0.0764122    | 0.082834  | conserved hypothetical protein                          |
| XP_009691989.1 | 0.0314282   | 0.24319    | 0.129233     | 0.0276562   | 0.244355   | 0.113181     | 0.121207  | conserved hypothetical protein                          |
| XP_009691990.1 | 0.100164    | 0.583378   | 0.171696     | 0.0977019   | 0.539669   | 0.18104      | 0.176368  | beta-tubulin cofactor D                                 |
| XP_009691991.1 | 0.0527145   | 0.807099   | 0.0653136    | 0.0579876   | 0.473575   | 0.122446     | 0.09388   | conserved hypothetical protein                          |
| XP_009691992.1 | 0.0610128   | 0.610762   | 0.0998963    | 0.0664035   | 0.581264   | 0.11424      | 0.107068  | conserved hypothetical protein                          |
| XP_009691993.1 | 0.0453896   | 0.538913   | 0.0842244    | 0.0490762   | 0.53921    | 0.091015     | 0.08762   | uncharacterized protein                                 |
| XP_009691994.1 | 0.0506298   | 0.230217   | 0.219921     | 0.0454796   | 0.214117   | 0.212406     | 0.216164  | conserved hypothetical protein                          |
| XP_009691995.1 | 0.0364487   | 0.474334   | 0.0768419    | 0.0210805   | 0.440536   | 0.0478519    | 0.062347  | conserved hypothetical protein                          |
| XP_009691996.1 | 0.0141694   | 0.953147   | 0.0148659    | 0.0204587   | 1.09068    | 0.0187577    | 0.016812  | nascent polypeptide associated complex subunit alpha    |
| XP_009691997.1 | 0.050762    | 0.505973   | 0.100326     | 0.0383125   | 0.408702   | 0.0937421    | 0.097034  | signal recognition particle subunit                     |
| XP_009691998.1 | 0.018179    | 0.115414   | 0.157511     |             |            |              | 0.157511  | conserved hypothetical protein                          |
| XP_009691999.1 | 0.0415962   | 0.460563   | 0.090316     | 0.0350608   | 0.509555   | 0.0688067    | 0.079561  | uncharacterized protein                                 |
| XP_009692000.1 | 0.0272743   | 0.706819   | 0.0385874    | 0.0222725   | 0.580545   | 0.0383648    | 0.038476  | conserved hypothetical protein                          |
| XP_009692001.1 | 0.0368567   | 0.415307   | 0.0887455    | 0.0285736   | 0.34708    | 0.0823258    | 0.085536  | uncharacterized protein                                 |
| XP_009692002.1 | 0.0315916   | 0.432028   | 0.0731241    | 0.03328     | 0.486138   | 0.0684579    | 0.070791  | RNase L inhibitor protein                               |
| XP_009692003.1 | 0.049049    | 0.495191   | 0.0990507    | 0.0497235   | 0.493942   | 0.100667     | 0.099859  | uncharacterized protein                                 |
| XP_009692004.1 | 0.0384269   | 0.725095   | 0.0529957    | 0.0184889   | 0.329904   | 0.0560433    | 0.054519  | conserved hypothetical protein                          |
| XP_009692005.1 | 0.0297363   | 0.463058   | 0.0642171    | 0.0355065   | 0.440053   | 0.0806869    | 0.072452  | uncharacterized protein                                 |
| XP_009692006.1 | 0.0569567   | 0.715136   | 0.0796446    | 0.0495174   | 0.557006   | 0.0888993    | 0.084272  | conserved hypothetical protein                          |
| XP_009692007.1 | 0.0195632   | 0.475439   | 0.0411477    | 0.023447    | 0.440689   | 0.0532054    | 0.047177  | uncharacterized protein                                 |
| XP_009692008.1 | 0.0708589   | 0.302588   | 0.234176     | 0.0660082   | 0.252812   | 0.261096     | 0.247636  | 50S ribosomal protein L21                               |
| XP_009692009.1 | 0.0320706   | 0.698006   | 0.0459461    | 0.0162287   | 0.388899   | 0.04173      | 0.043838  | uncharacterized protein                                 |
| XP_009692010.1 | 0.053651    | 0.483055   | 0.111066     | 0.0477502   | 0.359812   | 0.132709     | 0.121887  | conserved hypothetical protein                          |
| XP_009692011.1 | 0.000261544 | 0.261544   | 0.001        | 0.000290712 | 0.290712   | 0.001        | 0.001     | 40S ribosomal protein S7                                |
| XP_009692012.1 | 0.0448884   | 0.266872   | 0.168202     |             |            |              | 0.168202  | hypothetical protein                                    |
| XP_009692013.1 | 0.0696874   | 0.478125   | 0.145751     | 0.0632752   | 0.523719   | 0.120819     | 0.133285  | uncharacterized protein                                 |
| XP_009692014.1 | 0.082578    | 0.518866   | 0.159151     | 0.0602016   | 0.421766   | 0.142737     | 0.150944  | uncharacterized protein                                 |
| XP_009692015.1 | 0.00407675  | 0.575877   | 0.0070792    | 0.0039516   | 0.479306   | 0.00824441   | 0.007662  | 40S ribosomal protein S10                               |
| XP_009692016.1 | 0.0392208   | 0.498942   | 0.0786079    | 0.0408927   | 0.663958   | 0.0615893    | 0.070099  | uncharacterized protein                                 |
| XP_009692017.1 | 0.0190211   | 0.127875   | 0.148748     |             |            |              | 0.148748  | conserved hypothetical protein                          |
| XP_009692018.1 | 0.035862    | 0.245002   | 0.146374     |             |            |              | 0.146374  | conserved hypothetical protein                          |
| XP_009692019.1 | 0.0156234   | 0.324614   | 0.0481291    | 0.014219    | 0.249866   | 0.0569065    | 0.052518  | vacuolar proton-translocating ATPase                    |
| XP_009692020.1 | 0.0414142   | 0.572432   | 0.0723478    | 0.0492819   | 0.767085   | 0.0642458    | 0.068297  | FtsI cell division protein                              |
| XP_009692021.1 | 0.0870998   | 0.48669    | 0.178963     | 0.0468153   | 0.525638   | 0.0890639    | 0.134013  | conserved hypothetical protein                          |
| XP_009692022.1 | 0.0608955   | 0.344391   | 0.176821     | 0.0378983   | 0.245379   | 0.154448     | 0.165635  | uncharacterized protein                                 |
| XP_009692023.1 | 0.0040794   | 0.402059   | 0.0101463    | 0.00856634  | 0.348244   | 0.0245987    | 0.017372  | proteasome subunit alpha type                           |
| XP_009692024.1 | 0.0486034   | 0.243144   | 0.199896     | 0.0655324   | 0.29223    | 0.22425      | 0.212073  | proteasome component                                    |
| XP_009692025.1 | 0.0611724   | 0.671259   | 0.0911308    | 0.0348414   | 0.816078   | 0.0426937    | 0.066912  | conserved hypothetical protein                          |
| XP_009692026.1 | 0.00572344  | 0.300525   | 0.0190448    | 0.00206958  | 0.28892    | 0.00716317   | 0.013104  | endoplasmic reticulum lumen protein ERD2                |
| XP_009692027.1 | 0.0247038   | 0.621425   | 0.0397534    | 0.0112441   | 0.464488   | 0.0242075    | 0.03198   | uncharacterized protein                                 |
| XP_009692028.1 | 0.0668408   | 0.714913   | 0.0934951    | 0.0500419   | 0.822135   | 0.0608682    | 0.077182  | asparagine-rich protein                                 |
| XP_009692029.1 | 0.00646063  | 0.503741   | 0.0128253    | 0.0113926   | 0.60218    | 0.0189189    | 0.015872  | DEAD-box family ATP-dependent helicase                  |
| XP_009692030.1 | 0.0181575   | 0.450543   | 0.0403014    | 0.0173457   | 0.307644   | 0.0563823    | 0.048342  | serine/threonine kinase                                 |
| XP_009692031.1 | 0.0413224   | 0.354437   | 0.116586     | 0.0336715   | 0.366487   | 0.0918763    | 0.104231  | conserved hypothetical protein                          |
| XP_009692032.1 | 0.00707681  | 0.177556   | 0.0398567    |             |            |              | 0.0398567 | Plasmodium falciparum CPW-WPC repeat containing protein |
| XP_009692033.1 | 0.0354311   | 0.0204186  | 1.73524      |             |            |              | 1.73524   | hypothetical protein                                    |
| XP_009692034.1 | 0.000410087 | 0.410087   | 0.001        |             |            |              | 0.001     | conserved hypothetical protein                          |
| XP_009692035.1 | 0.0332777   | 1.06569    | 0.0312265    | 0.0317478   | 1.0691     | 0.0296959    | 0.030461  | DNA polymerase epsilon catalytic subunit                |
| XP_009692036.1 | 0.0362952   | 0.314025   | 0.11558      | 0.00363708  | 0.204042   | 0.0178252    | 0.066703  | conserved hypothetical protein                          |
| XP_009692037.1 | 0.0413631   | 0.75549    | 0.05475      | 0.0335454   | 0.691659   | 0.0484999    | 0.051625  | uncharacterized protein                                 |
| XP_009692038.1 | 0.0595731   | 0.421864   | 0.141214     | 0.045319    | 0.41535    | 0.10911      | 0.125162  | microtubule-associated protein                          |

| protein_id     | Chitose_ka | Chitose_ks | Chitose_kaks | Buffeli_ka | Buffeli_ks | Buffeli_kaks | mean_kaks | function                                           |
|----------------|------------|------------|--------------|------------|------------|--------------|-----------|----------------------------------------------------|
| XP_009692039.1 | 0.0814577  | 0.554261   | 0.146966     | 0.0801231  | 0.515146   | 0.155535     | 0.151251  | conserved hypothetical protein                     |
| XP_009692040.1 | 0.119979   | 0.408648   | 0.2936       | 0.101514   | 0.429633   | 0.236282     | 0.264941  | methylase                                          |
| XP_009692041.1 | 0.0646802  | 0.399026   | 0.162095     | 0.0747573  | 0.475625   | 0.157177     | 0.159636  | uncharacterized protein                            |
| XP_009692042.1 | 0.0133287  | 0.645555   | 0.0206469    | 0.0201566  | 0.893243   | 0.0225656    | 0.021606  | methyltransferase                                  |
| XP_009692043.1 | 0.0903701  | 0.8793     | 0.102775     | 0.0737249  | 0.852617   | 0.086469     | 0.094622  | predicted protein                                  |
| XP_009692044.1 | 0.0447666  | 0.396034   | 0.113037     | 0.0442247  | 0.382424   | 0.115643     | 0.11434   | uncharacterized protein                            |
| XP_009692046.1 | 0.0646953  | 0.53223    | 0.121555     | 0.0642158  | 0.435245   | 0.147539     | 0.134547  | pentatricopeptide repeat containing protein        |
| XP_009692047.1 | 0.0243813  | 0.562705   | 0.0433288    | 0.0254565  | 0.581434   | 0.0437823    | 0.043556  | endopeptidase ATP-binding subunit                  |
| XP_009692048.1 | 0.0295729  | 0.58973    | 0.0501464    | 0.0138588  | 0.691345   | 0.0200461    | 0.035096  | vacuolar protein sorting                           |
| XP_009692049.1 | 0.00986892 | 0.372374   | 0.0265027    | 0.00793451 | 0.305555   | 0.0259676    | 0.026235  | conserved hypothetical protein                     |
| XP_009692050.1 | 0.0426997  | 0.264676   | 0.161329     | 0.0248503  | 0.124251   | 0.200001     | 0.180665  | florfenicol resistance protein                     |
| XP_009692051.1 | 0.061524   | 0.225865   | 0.272393     |            |            |              | 0.272393  | hypothetical protein                               |
| XP_009692052.1 | 0.0324638  | 0.481402   | 0.067436     | 0.0256063  | 0.429196   | 0.0596611    | 0.063549  | uncharacterized protein                            |
| XP_009692053.1 | 0.0224125  | 0.469363   | 0.0477509    | 0.00038366 | 0.38366    | 0.001        | 0.024375  | fibrillarin                                        |
| XP_009692054.1 | 0.0353204  | 0.578848   | 0.0610184    | 0.0428688  | 0.447191   | 0.0958624    | 0.07844   | fibrillarin                                        |
| XP_009692055.1 | 0.0139223  | 0.364096   | 0.038238     | 0.0187121  | 0.422871   | 0.0442501    | 0.041244  | splicing component                                 |
| XP_009692056.1 | 0.13654    | 0.12125    | 1.1261       |            |            |              | 1.1261    | hypothetical protein                               |
| XP_009692057.1 | 0.0803054  | 0.641467   | 0.12519      | 0.0728189  | 0.548865   | 0.132672     | 0.128931  | cell-cycle-related serine/threonine protein kinase |
| XP_009692058.1 | 0.010355   | 0.765437   | 0.0135282    | 0.00737778 | 0.819906   | 0.00898833   | 0.011263  | conserved hypothetical protein                     |
| XP_009692059.1 | 0.038172   | 0.869063   | 0.0439232    | 0.0317569  | 0.445886   | 0.0712221    | 0.057573  | conserved hypothetical protein                     |
| XP_009692060.1 | 0.0660658  | 0.489837   | 0.134873     | 0.0822506  | 0.438573   | 0.187541     | 0.161207  | GTPase                                             |
| XP_009692061.1 | 0.0820995  | 0.51155    | 0.160492     | 0.0838902  | 0.521836   | 0.16076      | 0.160626  | uncharacterized protein                            |
| XP_009692062.1 | 0.134097   | 0.473758   | 0.283051     | 0.159972   | 0.497212   | 0.321739     | 0.302395  | conserved hypothetical protein                     |
| XP_009692063.1 | 0.0479588  | 0.682036   | 0.0703171    | 0.0430042  | 0.731707   | 0.0587724    | 0.064545  | helicase                                           |
| XP_009692064.1 | 0.0900842  | 0.666477   | 0.135165     | 0.0890513  | 0.661407   | 0.134639     | 0.134902  | conserved hypothetical protein                     |
| XP_009692065.1 | 0.0107742  | 0.465677   | 0.0231367    | 0.0118759  | 0.454837   | 0.0261103    | 0.024623  | Hbeta58/Vps26 protein                              |
| XP_009692066.1 | 0.0357352  | 0.247807   | 0.144206     |            |            |              | 0.144206  | uncharacterized protein                            |
| XP_009692067.1 | 0.0133688  | 0.557056   | 0.0239991    | 0.0129642  | 0.48092    | 0.026957     | 0.025478  | conserved hypothetical protein                     |
| XP_009692068.1 | 0.0324791  | 0.513418   | 0.0632606    | 0.0615705  | 0.665978   | 0.0924512    | 0.077856  | conserved hypothetical protein                     |
| XP_009692069.1 | 0.106845   | 0.507008   | 0.210737     | 0.0789752  | 0.4716     | 0.167462     | 0.1891    | conserved hypothetical protein                     |
| XP_009692070.1 | 0.0476595  | 0.510447   | 0.0933682    | 0.0344727  | 0.473708   | 0.0727721    | 0.08307   | protein kinase                                     |
| XP_009692071.1 | 0.0360575  | 0.419589   | 0.0859353    | 0.0318935  | 0.305444   | 0.104417     | 0.095176  | tryptophanyl-tRNA synthetase                       |
| XP_009692072.1 | 0.0909096  | 0.718891   | 0.126458     | 0.0823216  | 0.63529    | 0.129581     | 0.12802   | conserved hypothetical protein                     |
| XP_009692073.1 | 0.0341536  | 0.563438   | 0.0606164    | 0.0223823  | 0.504754   | 0.044343     | 0.05248   | DEAD-box family helicase                           |
| XP_009692074.1 | 0.0767335  | 0.623928   | 0.122985     |            |            |              | 0.122985  | conserved hypothetical protein                     |
| XP_009692075.1 | 0.0521209  | 0.701315   | 0.0743189    | 0.0314226  | 0.623681   | 0.0503824    | 0.062351  | coronin                                            |
| XP_009692076.1 | 0.00315974 | 1.08031    | 0.00292485   | 0.00352935 | 0.853003   | 0.00413756   | 0.003531  | 60S ribosomal protein L26                          |
| XP_009692077.1 | 0.0334422  | 0.711129   | 0.0470269    | 0.0289005  | 1.39715    | 0.0206853    | 0.033856  | uncharacterized protein                            |
| XP_009692078.1 | 0.0252071  | 0.358133   | 0.0703848    | 0.0246168  | 0.374158   | 0.0657926    | 0.068089  | methionine aminopeptidase                          |
| XP_009692079.1 | 0.0221285  | 0.55759    | 0.0396859    | 0.0379639  | 0.525461   | 0.0722487    | 0.055967  | uncharacterized protein                            |
| XP_009692080.1 | 0.0479585  | 0.457439   | 0.104841     | 0.0341161  | 0.556127   | 0.0613459    | 0.083093  | ubiquitin carboxyl-terminal hydrolase              |
| XP_009692081.1 | 0.0366731  | 0.641375   | 0.0571788    | 0.0509243  | 0.646521   | 0.0787667    | 0.067973  | uncharacterized protein                            |
| XP_009692082.1 | 0.0473185  | 0.503371   | 0.0940033    |            |            |              | 0.0940033 | uncharacterized protein                            |
| XP_009692083.1 | 0.0460226  | 0.560415   | 0.0821223    | 0.0381641  | 0.496186   | 0.0769148    | 0.079519  | uncharacterized protein                            |
| XP_009692084.1 | 0.0163482  | 0.160571   | 0.101813     | 0.0314601  | 0.139155   | 0.22608      | 0.163946  | conserved hypothetical protein                     |
| XP_009692085.1 | 0.0271238  | 0.899443   | 0.0301562    | 0.0204499  | 0.766463   | 0.0266809    | 0.028419  | proteasome subunit                                 |
| XP_009692086.1 | 0.0581284  | 0.541283   | 0.10739      | 0.063265   | 0.449431   | 0.140767     | 0.124079  | uncharacterized protein                            |
| XP_009692087.1 |            |            |              | 0.0847127  | 0.0540759  | 1.56655      | 1.56655   | hypothetical protein                               |
| XP_009692088.1 | 0.0463139  | 0.597234   | 0.0775473    | 0.108818   | 0.61048    | 0.178251     | 0.127899  | conserved hypothetical protein                     |
| XP_009692089.1 | 0.0491513  | 0.623398   | 0.0788442    | 0.0321217  | 0.498501   | 0.0644366    | 0.07164   | glycosyl transferase                               |
| XP_009692090.1 | 0.102517   | 0.390368   | 0.262616     | 0.0923925  | 0.51204    | 0.18044      | 0.221528  | conserved hypothetical protein                     |
| XP_009692091.1 | 0.0701804  | 0.565355   | 0.124135     | 0.0591341  | 0.556208   | 0.106317     | 0.115226  | uncharacterized protein                            |
| XP_009692094.1 | 0.0466051  | 0.486456   | 0.0958054    | 0.0339287  | 0.315373   | 0.107583     | 0.101694  | nucleoside diphosphate hydrolase                   |



| protein_id     | Chitose_ka  | Chitose_ks | Chitose_kaks | Buffeli_ka | Buffeli_ks | Buffeli_kaks | mean_kaks | function                                             |
|----------------|-------------|------------|--------------|------------|------------|--------------|-----------|------------------------------------------------------|
| XP_009692095.1 | 0.20377     | 1.1171     | 0.182411     |            |            |              | 0.182411  | hypothetical protein                                 |
| XP_009692096.1 | 0.0549704   | 0.613891   | 0.0895442    |            |            |              | 0.0895442 | uncharacterized protein                              |
| XP_009692097.1 | 0.099021    | 0.586923   | 0.168712     | 0.100659   | 0.645614   | 0.155912     | 0.162312  | 40S ribosomal protein S27a                           |
| XP_009692098.1 | 0.060231    | 0.780474   | 0.0771723    | 0.0521402  | 0.643088   | 0.0810778    | 0.079125  | uncharacterized protein                              |
| XP_009692099.1 | 0.0142979   | 0.489119   | 0.0292319    | 0.0120948  | 0.552896   | 0.0218753    | 0.025554  | conserved hypothetical protein                       |
| XP_009692100.1 | 0.0444685   | 0.26856    | 0.165581     |            |            |              | 0.165581  | uncharacterized protein                              |
| XP_009692101.1 | 0.011859    | 0.621261   | 0.0190886    | 0.00728725 | 0.678439   | 0.0107412    | 0.014915  | ribosomal protein S2                                 |
| XP_009692102.1 | 0.142771    | 0.745813   | 0.19143      | 0.119606   | 0.724176   | 0.165161     | 0.178295  | conserved hypothetical protein                       |
| XP_009692103.1 | 0.0400892   | 0.742536   | 0.0539896    | 0.0439256  | 0.460123   | 0.095465     | 0.074727  | conserved hypothetical protein                       |
| XP_009692104.1 | 0.0378107   | 0.4771     | 0.079251     | 0.0409636  | 0.367961   | 0.111326     | 0.095288  | 16S rRNA processing protein                          |
| XP_009692105.1 | 0.0545299   | 0.309314   | 0.176293     | 0.0287031  | 0.192561   | 0.14906      | 0.162677  | conserved hypothetical protein                       |
| XP_009692106.1 | 0.0721955   | 0.724465   | 0.0996535    | 0.0574777  | 0.683791   | 0.0840573    | 0.091855  | conserved hypothetical protein                       |
| XP_009692107.1 | 0.0346122   | 1.0764     | 0.0321557    | 0.0305699  | 1.07165    | 0.0285261    | 0.030341  | valyl-tRNA synthetase                                |
| XP_009692108.1 | 0.0423668   | 1.16995    | 0.0362125    | 0.0406917  | 0.801015   | 0.0508002    | 0.043506  | eukaryotic translation initiation factor 3 subunit 8 |
| XP_009692109.1 | 0.0492672   | 0.687338   | 0.0716783    | 0.034112   | 0.547505   | 0.0623043    | 0.066991  | uncharacterized protein                              |
| XP_009692110.1 | 0.021338    | 0.572091   | 0.0372982    | 0.0232642  | 0.300329   | 0.0774625    | 0.05738   | mitochondrial large subunit ribosomal protein        |
| XP_009692113.1 | 0.0451022   | 0.530071   | 0.0850871    | 0.0229124  | 0.436341   | 0.0525103    | 0.068799  | conserved hypothetical protein                       |
| XP_009692114.1 | 0.0276254   | 0.783371   | 0.0352647    | 0.0211624  | 0.728054   | 0.029067     | 0.032166  | 50S ribosomal protein L3                             |
| XP_009692115.1 | 0.046664    | 0.773326   | 0.060342     | 0.0553022  | 0.76616    | 0.072181     | 0.066262  | GTP-binding protein/GTPase                           |
| XP_009692116.1 | 0.0214181   | 1.52943    | 0.0140039    | 0.0218944  | 1.0969     | 0.0199602    | 0.016982  | vacuolar H <sup>+</sup> -ATPase subunit              |
| XP_009692118.1 | 0.0169755   | 0.795203   | 0.0213474    | 0.0506996  | 0.523933   | 0.0967673    | 0.059057  | uncharacterized protein                              |
| XP_009692119.1 | 0.102165    | 0.533512   | 0.191494     |            |            |              | 0.191494  | uncharacterized protein                              |
| XP_009692120.1 | 0.156743    | 1.08984    | 0.143823     |            |            |              | 0.143823  | conserved hypothetical protein                       |
| XP_009692121.1 | 0.0751998   | 0.812678   | 0.0925334    | 0.0536108  | 1.15653    | 0.0463548    | 0.069444  | sodium transporter                                   |
| XP_009692123.1 |             |            |              | 0.0864506  | 0.588617   | 0.146871     | 0.146871  | conserved hypothetical protein                       |
| XP_009692124.1 | 4.10345E-05 | 0.0410345  | 0.001        |            |            |              | 0.001     | conserved hypothetical protein                       |
| XP_009692125.1 | 0.129213    | 0.769815   | 0.167849     | 0.0865023  | 0.54513    | 0.158682     | 0.163266  | conserved hypothetical protein                       |
| XP_009692126.1 | 0.0260225   | 0.810087   | 0.032123     | 0.0327591  | 0.71185    | 0.0460196    | 0.039071  | branched-chain alpha-keto acid dehydrogenase E1      |
| XP_009692127.1 | 0.112049    | 1.17567    | 0.0953058    | 0.103914   | 0.968033   | 0.107346     | 0.101326  | uncharacterized protein                              |
| XP_009692129.1 | 0.0651258   | 0.830084   | 0.0784568    | 0.0126546  | 1.24589    | 0.0101571    | 0.044307  | tRNA-splicing endonuclease                           |
| XP_009692130.1 |             |            |              | 0.11495    | 1.15428    | 0.0995865    | 0.0995865 | uncharacterized protein                              |
| XP_009692131.1 | 0.00680579  | 0.558838   | 0.0121785    |            |            |              | 0.0121785 | vacuolar H <sup>+</sup> -ATPase%2C a subunit         |
| XP_009692132.1 | 0.011912    | 0.63155    | 0.0188615    | 0.0235463  | 0.478295   | 0.0492297    | 0.034046  | conserved hypothetical protein                       |
| XP_009692136.1 | 0.0978149   | 0.712071   | 0.137367     | 0.0745279  | 0.821694   | 0.0907003    | 0.114034  | conserved hypothetical protein                       |
| XP_009692137.1 | 0.0750422   | 0.504127   | 0.148856     | 0.0747481  | 0.632734   | 0.118135     | 0.133495  | conserved hypothetical protein                       |
| XP_009692138.1 | 0.00252951  | 0.0624803  | 0.0404848    | 0.0471922  | 0.779959   | 0.060506     | 0.050495  | uncharacterized protein                              |
| XP_009692139.1 | 0.126224    | 0.925364   | 0.136405     | 0.111864   | 0.828828   | 0.134966     | 0.135686  | conserved hypothetical protein                       |
| XP_009692140.1 | 0.104608    | 0.320699   | 0.326188     | 0.114014   | 0.661277   | 0.172414     | 0.249301  | conserved hypothetical protein                       |
| XP_009692141.1 | 0.0214791   | 0.919069   | 0.0233705    | 0.0123799  | 0.745749   | 0.0166006    | 0.019986  | enolase                                              |
| XP_009692142.1 | 0.0073167   | 0.260519   | 0.0280851    | 0.00202914 | 0.295258   | 0.00687243   | 0.017479  | predicted protein                                    |
| XP_009692143.1 | 0.0372582   | 0.612026   | 0.0608768    | 0.0242146  | 0.425212   | 0.056947     | 0.058912  | uncharacterized protein                              |
| XP_009692144.1 | 0.059303    | 0.687736   | 0.0862292    | 0.0608036  | 0.586964   | 0.10359      | 0.09491   | uncharacterized protein                              |
| XP_009692145.1 | 0.0696948   | 0.378297   | 0.184233     | 0.0674313  | 0.456678   | 0.147656     | 0.165944  | conserved hypothetical protein                       |
| XP_009692146.1 | 0.0945669   | 0.591396   | 0.159905     | 0.0852292  | 0.68679    | 0.124098     | 0.142002  | uncharacterized protein                              |
| XP_009692147.1 | 0.0674084   | 0.797105   | 0.0845665    | 0.0915418  | 0.495585   | 0.184715     | 0.134641  | conserved hypothetical protein                       |
| XP_009692148.1 | 0.0826707   | 0.807785   | 0.102342     | 0.0708363  | 0.885837   | 0.0799654    | 0.091154  | conserved hypothetical protein                       |
| XP_009692149.1 | 0.0520207   | 0.851961   | 0.06106      | 0.0423     | 0.897711   | 0.0471198    | 0.05409   | conserved hypothetical protein                       |
| XP_009692150.1 | 0.0112615   | 0.0451819  | 0.249247     | 0.00832967 | 0.0575737  | 0.144678     | 0.196962  | hypothetical protein                                 |
| XP_009692151.1 | 0.0251597   | 0.57328    | 0.0438873    |            |            |              | 0.0438873 | phosphoglycerate mutase                              |
| XP_009692152.1 | 0.0238582   | 0.276431   | 0.086308     | 0.0405978  | 0.335727   | 0.120925     | 0.103617  | uncharacterized protein                              |
| XP_009692153.1 | 0.0330079   | 0.463277   | 0.0712487    | 0.0144535  | 0.215737   | 0.0669958    | 0.069122  | Pbj2                                                 |
| XP_009692154.1 | 0.0599693   | 0.36089    | 0.16617      | 0.0571133  | 0.278621   | 0.204985     | 0.185578  | uncharacterized protein                              |
| XP_009692155.1 | 0.038901    | 0.447413   | 0.0869463    | 0.0208097  | 0.270852   | 0.0768308    | 0.081889  | conserved hypothetical protein                       |

| protein_id     | Chitose_ka  | Chitose_ks | Chitose_kaks | Buffeli_ka  | Buffeli_ks | Buffeli_kaks | mean_kaks | function                                                       |
|----------------|-------------|------------|--------------|-------------|------------|--------------|-----------|----------------------------------------------------------------|
| XP_009692156.1 | 0.050284    | 0.306778   | 0.16391      | 0.0581922   | 0.272807   | 0.21331      | 0.18861   | conserved hypothetical protein                                 |
| XP_009692157.1 | 0.010998    | 0.730797   | 0.0150494    | 0.0110455   | 1.03919    | 0.0106289    | 0.012839  | heat-shock protein HSP70                                       |
| XP_009692158.1 | 0.0986242   | 0.709076   | 0.139088     | 0.0965609   | 0.657039   | 0.146964     | 0.143026  | uncharacterized protein                                        |
| XP_009692159.1 | 0.0221612   | 0.296413   | 0.0747646    | 0.0157852   | 0.273459   | 0.0577242    | 0.066244  | succinyl-CoA ligase [GDP-forming] alpha-chain%2C mitochondrial |
| XP_009692160.1 | 0.00968861  | 0.529953   | 0.018282     | 0.0130324   | 0.570729   | 0.0228346    | 0.020558  | uncharacterized protein                                        |
| XP_009692161.1 | 0.0156181   | 0.58534    | 0.0266822    | 0.0224075   | 1.27414    | 0.0175864    | 0.022134  | conserved hypothetical protein                                 |
| XP_009692162.1 | 0.0156404   | 0.608195   | 0.0257161    | 0.00909257  | 0.478593   | 0.0189985    | 0.022357  | RuvB-like DNA repair helicase                                  |
| XP_009692163.1 | 0.0971279   | 0.610152   | 0.159187     | 0.122743    | 0.795359   | 0.154324     | 0.156755  | uncharacterized protein                                        |
| XP_009692164.1 | 0.077461    | 0.898834   | 0.0861794    | 0.0743204   | 1.07401    | 0.0691988    | 0.077689  | uncharacterized protein                                        |
| XP_009692165.1 | 0.0322028   | 0.774192   | 0.0415954    | 0.0398444   | 0.670063   | 0.0594636    | 0.050529  | PRL1 protein                                                   |
| XP_009692166.1 | 0.137076    | 0.481007   | 0.284978     | 0.148966    | 0.496439   | 0.300068     | 0.292523  | conserved hypothetical protein                                 |
| XP_009692167.1 | 0.0816401   | 0.634831   | 0.128601     |             |            |              | 0.128601  | uncharacterized protein                                        |
| XP_009692168.1 | 0.0226745   | 0.390268   | 0.0580998    | 0.0165662   | 0.489039   | 0.0338751    | 0.045987  | uncharacterized protein                                        |
| XP_009692169.1 | 0.0662002   | 0.316869   | 0.20892      | 0.0285592   | 0.165485   | 0.172579     | 0.19075   | uncharacterized protein                                        |
| XP_009692170.1 | 3.02118E-05 | 0.0302118  | 0.001        | 0.000346536 | 0.346536   | 0.001        | 0.001     | RING-box protein 1a                                            |
| XP_009692171.1 | 0.0442153   | 0.569182   | 0.0776821    | 0.0474163   | 0.57363    | 0.08266      | 0.080171  | uncharacterized protein                                        |
| XP_009692172.1 | 0.045166    | 0.219186   | 0.206062     |             |            |              | 0.206062  | conserved hypothetical protein                                 |
| XP_009692173.1 | 0.0421684   | 0.514941   | 0.0818898    | 0.0406517   | 0.5589     | 0.0727352    | 0.077313  | uncharacterized protein                                        |
| XP_009692174.1 | 0.0357468   | 0.404623   | 0.088346     | 0.0399223   | 0.341145   | 0.117024     | 0.102685  | histone H4                                                     |
| XP_009692176.1 | 0.0222105   | 0.731411   | 0.0303666    | 0.00895333  | 0.5917     | 0.0151315    | 0.022749  | protein kinase                                                 |
| XP_009692177.1 | 0.0159094   | 0.366131   | 0.0434529    | 0.0109677   | 0.451035   | 0.0243168    | 0.033885  | centrin                                                        |
| XP_009692178.1 | 0.00931701  | 0.62279    | 0.0149601    | 0.00704338  | 0.595734   | 0.011823     | 0.013392  | 40S ribosomal protein S4                                       |
| XP_009692179.1 | 0.0245623   | 0.439952   | 0.0558295    | 0.0300309   | 0.479486   | 0.0626314    | 0.05923   | uncharacterized protein                                        |
| XP_009692180.1 | 0.0698257   | 0.339419   | 0.205721     | 0.0494822   | 0.25042    | 0.197597     | 0.201659  | conserved hypothetical protein                                 |
| XP_009692182.1 | 0.0524382   | 0.349342   | 0.150105     | 0.0450212   | 0.393923   | 0.114289     | 0.132197  | conserved hypothetical protein                                 |
| XP_009692183.1 | 0.124183    | 0.5476     | 0.226777     |             |            |              | 0.226777  | conserved hypothetical protein                                 |
| XP_009692184.1 | 0.0928665   | 0.5052     | 0.183821     | 0.0962752   | 0.391167   | 0.246123     | 0.214972  | conserved hypothetical protein                                 |
| XP_009692185.1 | 0.0701755   | 0.388745   | 0.180518     | 0.0772045   | 0.32532    | 0.237318     | 0.208918  | conserved hypothetical protein                                 |
| XP_009692186.1 | 0.0442349   | 0.471699   | 0.0937777    | 0.0513546   | 0.493205   | 0.104124     | 0.098951  | conserved hypothetical protein                                 |
| XP_009692187.1 | 0.0605246   | 0.813788   | 0.0743739    | 0.0376943   | 0.585067   | 0.0644274    | 0.069401  | conserved hypothetical protein                                 |
| XP_009692188.1 | 0.110939    | 0.74745    | 0.148424     | 0.100424    | 0.635105   | 0.158122     | 0.153273  | conserved hypothetical protein                                 |
| XP_009692189.1 | 0.0453981   | 0.454274   | 0.0999355    | 0.0399429   | 0.545776   | 0.0731854    | 0.08656   | conserved hypothetical protein                                 |
| XP_009692190.1 | 0.107388    | 0.602052   | 0.17837      | 0.0944068   | 0.535822   | 0.176191     | 0.177281  | conserved hypothetical protein                                 |
| XP_009692191.1 | 0.0656784   | 0.619993   | 0.105934     | 0.0590418   | 0.643042   | 0.0918164    | 0.098875  | DEAD-box family helicase                                       |
| XP_009692193.1 | 0.0766942   | 0.504259   | 0.152093     | 0.0625185   | 0.532815   | 0.117336     | 0.134715  | conserved hypothetical protein                                 |
| XP_009692196.1 | 0.0739218   | 0.384493   | 0.192258     |             |            |              | 0.192258  | uncharacterized protein                                        |
| XP_009692199.1 | 0.0163285   | 0.434428   | 0.0375862    | 0.0186397   | 0.480578   | 0.0387861    | 0.038186  | conserved hypothetical protein                                 |
| XP_009692200.1 | 0.0801272   | 0.748691   | 0.107023     | 0.0673974   | 0.366853   | 0.183718     | 0.14537   | conserved hypothetical protein                                 |
| XP_009692201.1 | 0.10363     | 0.425729   | 0.243419     | 0.078284    | 0.425762   | 0.183868     | 0.213643  | conserved hypothetical protein                                 |
| XP_009692202.1 | 0.0311726   | 0.216312   | 0.14411      | 0.0418872   | 0.316565   | 0.132318     | 0.138214  | 30S ribosomal protein S15                                      |
| XP_009692203.1 | 0.0366873   | 0.903927   | 0.0405865    | 0.0434065   | 0.927752   | 0.0467867    | 0.043687  | conserved hypothetical protein                                 |
| XP_009692204.1 | 0.0226172   | 0.794617   | 0.028463     | 0.0271362   | 0.884407   | 0.0306829    | 0.029573  | DNA-directed RNA polymerase III largest subunit RPC1           |
| XP_009692205.1 | 0.0845959   | 0.994731   | 0.085044     | 0.0691083   | 1.0152     | 0.0680736    | 0.076559  | uncharacterized protein                                        |
| XP_009692206.1 | 0.0436982   | 0.764488   | 0.0571602    | 0.0336726   | 0.732678   | 0.0459582    | 0.051559  | heat shock protein HSP90                                       |
| XP_009692207.1 | 0.0869563   | 0.796272   | 0.109204     | 0.0702989   | 0.690515   | 0.101806     | 0.105505  | serine/threonine protein kinase                                |
| XP_009692208.1 | 0.0226366   | 0.438385   | 0.0516364    | 0.0141885   | 0.400805   | 0.0354       | 0.043518  | Rab GTPase                                                     |
| XP_009692209.1 | 0.0581627   | 0.558591   | 0.104124     | 0.0579803   | 0.609849   | 0.0950732    | 0.099599  | uncharacterized protein                                        |
| XP_009692210.1 | 0.0831337   | 0.508902   | 0.163359     | 0.0804981   | 0.415433   | 0.193769     | 0.178564  | conserved hypothetical protein                                 |
| XP_009692211.1 | 0.0506303   | 0.287871   | 0.175878     |             |            |              | 0.175878  | uncharacterized protein                                        |
| XP_009692212.1 | 0.048046    | 0.938294   | 0.0512057    | 0.0393348   | 0.820146   | 0.0479607    | 0.049583  | vacuolar protein sorting/secretion protein                     |
| XP_009692213.1 | 0.078861    | 0.399808   | 0.197247     |             |            |              | 0.197247  | conserved hypothetical protein                                 |
| XP_009692214.1 | 0.0973199   | 0.253354   | 0.384126     | 0.0741141   | 0.371399   | 0.199554     | 0.29184   | uncharacterized protein                                        |
| XP_009692215.1 | 0.030675    | 0.390334   | 0.0785864    | 0.00498434  | 4.88704    | 0.00101991   | 0.039803  | uncharacterized protein                                        |

| protein_id     | Chitose_ka  | Chitose_ks | Chitose_kaks | Buffeli_ka  | Buffeli_ks | Buffeli_kaks | mean_kaks | function                                     |
|----------------|-------------|------------|--------------|-------------|------------|--------------|-----------|----------------------------------------------|
| XP_009692216.1 | 0.0382067   | 0.338333   | 0.112926     | 0.0314173   | 0.298316   | 0.105316     | 0.109121  | conserved hypothetical protein               |
| XP_009692217.1 | 0.0328567   | 0.329813   | 0.0996222    |             |            |              | 0.0996222 | conserved hypothetical protein               |
| XP_009692218.1 | 0.0748147   | 0.560799   | 0.133407     | 0.0777905   | 0.500716   | 0.155359     | 0.144383  | conserved hypothetical protein               |
| XP_009692219.1 | 0.060393    | 0.557168   | 0.108393     | 0.0483912   | 0.434701   | 0.111321     | 0.109857  | replication factor C                         |
| XP_009692220.1 | 0.0941843   | 0.583063   | 0.161534     | 0.083698    | 0.821352   | 0.101903     | 0.131719  | uncharacterized protein                      |
| XP_009692221.1 | 0.0956068   | 0.534259   | 0.178952     | 0.0819188   | 0.571389   | 0.143368     | 0.16116   | uncharacterized protein                      |
| XP_009692222.1 | 0.088202    | 0.760618   | 0.115961     | 0.0889945   | 0.692181   | 0.128571     | 0.122266  | uncharacterized protein                      |
| XP_009692223.1 | 0.0518971   | 0.380191   | 0.136503     | 0.0583682   | 0.36126    | 0.161568     | 0.149035  | uncharacterized protein                      |
| XP_009692224.1 | 0.0584641   | 0.367921   | 0.158904     | 0.0773331   | 0.449073   | 0.172206     | 0.165555  | conserved hypothetical protein               |
| XP_009692225.1 | 0.0434998   | 0.433121   | 0.100433     | 0.0378383   | 0.327727   | 0.115457     | 0.107945  | uncharacterized protein                      |
| XP_009692226.1 | 0.039991    | 0.446118   | 0.0896422    | 0.0415007   | 0.466      | 0.0890573    | 0.08935   | mRNA cleavage factor subunit                 |
| XP_009692227.1 | 0.000179413 | 0.179413   | 0.001        |             |            |              | 0.001     | conserved hypothetical protein               |
| XP_009692228.1 | 0.0146573   | 0.209512   | 0.0699594    | 0.034863    | 0.278854   | 0.125022     | 0.097491  | acetyltransferase                            |
| XP_009692229.1 | 0.068979    | 0.361072   | 0.19104      | 0.076697    | 0.245037   | 0.313002     | 0.252021  | uncharacterized protein                      |
| XP_009692230.1 | 0.0282593   | 0.366357   | 0.0771361    | 0.0445169   | 0.529363   | 0.0840952    | 0.080616  | hypothetical protein                         |
| XP_009692231.1 | 0.0321312   | 0.51539    | 0.0623435    | 0.024243    | 0.499368   | 0.0485472    | 0.054445  | phenylalanyl-tRNA synthetase                 |
| XP_009692232.1 | 0.0574139   | 0.546035   | 0.105147     | 0.064183    | 0.556428   | 0.115348     | 0.110247  | uncharacterized protein                      |
| XP_009692233.1 | 0.0263158   | 0.461483   | 0.0570244    | 0.0242416   | 0.453758   | 0.053424     | 0.055224  | isocitrate dehydrogenase                     |
| XP_009692234.1 | 0.0693846   | 0.701209   | 0.0989498    | 0.0784276   | 0.621606   | 0.126169     | 0.112559  | conserved hypothetical protein               |
| XP_009692235.1 | 0.0026503   | 0.359809   | 0.00736585   | 0.000317305 | 0.317305   | 0.001        | 0.004183  | proteasome subunit beta type                 |
| XP_009692236.1 | 0.0238311   | 0.29634    | 0.0804182    |             |            |              | 0.0804182 | conserved hypothetical protein               |
| XP_009692237.1 | 0.0414891   | 0.436591   | 0.0950298    |             |            |              | 0.0950298 | conserved hypothetical protein               |
| XP_009692238.1 | 0.0654807   | 0.364292   | 0.179748     | 0.129745    | 0.185732   | 0.698561     | 0.439155  | uncharacterized protein                      |
| XP_009692239.1 | 0.0361099   | 0.550286   | 0.0656202    | 0.0214859   | 0.499479   | 0.0430165    | 0.054318  | SWI/SNF-related chromatin remodelling factor |
| XP_009692240.1 | 0.0589023   | 0.372662   | 0.158058     | 0.0493377   | 0.392126   | 0.125821     | 0.141939  | translation elongation factor 1-alpha        |
| XP_009692241.1 | 0.11316     | 0.645366   | 0.175342     | 0.0845606   | 0.671047   | 0.126013     | 0.150677  | uncharacterized protein                      |
| XP_009692242.1 | 0.0283937   | 0.397072   | 0.0715079    | 0.0178229   | 0.310698   | 0.057364     | 0.064436  | uncharacterized protein                      |
| XP_009692243.1 | 0.0555791   | 0.787808   | 0.0705491    | 0.054502    | 0.854118   | 0.0638109    | 0.06718   | ankyrin repeat containing protein            |
| XP_009692244.1 | 0.0552431   | 0.499268   | 0.110648     | 0.0424117   | 0.276285   | 0.153507     | 0.132078  | uncharacterized protein                      |
| XP_009692245.1 | 0.0108373   | 0.706209   | 0.0153457    | 0.0132561   | 0.68908    | 0.0192373    | 0.017292  | pyruvate kinase                              |
| XP_009692246.1 | 0.0563283   | 0.477495   | 0.117966     | 0.0719555   | 0.579919   | 0.124078     | 0.121022  | uncharacterized protein                      |
| XP_009692249.1 | 0.0737441   | 0.498337   | 0.14798      | 0.0736206   | 0.514595   | 0.143065     | 0.145522  | conserved hypothetical protein               |
| XP_009692250.1 | 0.0907442   | 0.451755   | 0.20087      | 0.0927823   | 0.521827   | 0.177803     | 0.189336  | conserved hypothetical protein               |
| XP_009692251.1 | 4.92778E-05 | 0.0492778  | 0.001        |             |            |              | 0.001     | hypothetical protein                         |
| XP_009692252.1 | 0.0602004   | 0.707012   | 0.0851477    | 0.0502578   | 0.502845   | 0.0999469    | 0.092547  | conserved hypothetical protein               |
| XP_009692254.1 | 0.0913202   | 0.536771   | 0.170129     | 0.10166     | 0.56008    | 0.181511     | 0.17582   | conserved hypothetical protein               |
| XP_009692255.1 | 0.0830902   | 0.418448   | 0.198567     | 0.101924    | 0.342679   | 0.297433     | 0.248     | papain-family cysteine protease              |
| XP_009692256.1 | 0.0151487   | 0.0913844  | 0.16577      | NA          | NA         | NA           | NA        | uncharacterized protein                      |
| XP_009692257.1 | 0.0383123   | 0.0927391  | 0.413119     |             |            |              | 0.413119  | conserved hypothetical protein               |
| XP_009692258.1 | 0.0586886   | 0.881249   | 0.0665971    | 0.0556958   | 1.03121    | 0.0540101    | 0.060304  | conserved hypothetical protein               |
| XP_009692259.1 | 0.0634852   | 0.316654   | 0.200488     | 0.0370427   | 0.325724   | 0.113724     | 0.157106  | uncharacterized protein                      |
| XP_009692260.1 | 0.0279081   | 0.793262   | 0.0351814    | 0.0372049   | 0.654218   | 0.0568692    | 0.046025  | mitochondrial carrier protein                |
| XP_009692261.1 | 0.0392938   | 0.690017   | 0.0569462    | 0.0312545   | 0.653345   | 0.0478376    | 0.052392  | leucyl-tRNA synthetase                       |
| XP_009692262.1 | 0.102706    | 0.663644   | 0.154761     | 0.0908869   | 0.367167   | 0.247535     | 0.201148  | conserved hypothetical protein               |
| XP_009692263.1 | 0.0824252   | 0.503919   | 0.163568     | 0.0928045   | 0.650316   | 0.142707     | 0.153137  | uncharacterized protein                      |
| XP_009692264.1 | 0.0831981   | 0.466302   | 0.178421     | 0.0856375   | 0.407408   | 0.210201     | 0.194311  | uncharacterized protein                      |
| XP_009692267.1 | 0.0241361   | 0.395005   | 0.0611033    | 0.0126573   | 0.398164   | 0.0317892    | 0.046446  | mRNA turnover/deadenylation component        |
| XP_009692268.1 | 0.00973886  | 0.111145   | 0.0876228    |             |            |              | 0.0876228 | conserved hypothetical protein               |
| XP_009692269.1 | 0.0197826   | 1.13205    | 0.017475     | 0.0189725   | 0.790337   | 0.0240056    | 0.02074   | conserved hypothetical protein               |
| XP_009692270.1 | 0.0308302   | 0.252226   | 0.122233     |             |            |              | 0.122233  | cyclin                                       |
| XP_009692271.1 | 0.0919302   | 0.48551    | 0.189348     | 0.0848861   | 0.380765   | 0.222936     | 0.206142  | conserved hypothetical protein               |
| XP_009692272.1 | 0.0376555   | 0.537758   | 0.0700231    | 0.030423    | 0.431541   | 0.0704985    | 0.070261  | small GTPase                                 |
| XP_009692273.1 | 0.0566902   | 0.219353   | 0.258442     |             |            |              | 0.258442  | conserved hypothetical protein               |

| protein_id     | Chitose_ka | Chitose_ks | Chitose_kaks | Buffeli_ka | Buffeli_ks | Buffeli_kaks | mean_kaks  | function                                                     |
|----------------|------------|------------|--------------|------------|------------|--------------|------------|--------------------------------------------------------------|
| XP_009692275.1 | 0.090291   | 0.958651   | 0.0941855    | 0.0956313  | 0.937054   | 0.102055     | 0.09812    | uncharacterized protein                                      |
| XP_009692276.1 | 0.127975   | 0.638391   | 0.200465     | 0.100503   | 0.609843   | 0.164802     | 0.182634   | uncharacterized protein                                      |
| XP_009692278.1 | 0.0316219  | 0.394983   | 0.0800587    | 0.031952   | 0.56855    | 0.0561991    | 0.068129   | uncharacterized protein                                      |
| XP_009692279.1 | 0.0278747  | 0.385189   | 0.0723662    | 0.0322622  | 0.407918   | 0.0790899    | 0.075728   | conserved hypothetical protein                               |
| XP_009692280.1 | 0.0619456  | 0.355201   | 0.174396     | 0.0591713  | 0.452833   | 0.130669     | 0.152533   | conserved hypothetical protein                               |
| XP_009692281.1 | 0.0463822  | 0.616549   | 0.0752288    | 0.0729495  | 0.527699   | 0.138241     | 0.106735   | sybindin                                                     |
| XP_009692283.1 | 0.0573688  | 0.5742     | 0.0999108    |            |            |              | 0.0999108  | uncharacterized protein                                      |
| XP_009692284.1 | 0.0464819  | 0.765457   | 0.0607244    | 0.0389906  | 0.310684   | 0.125499     | 0.093112   | nuclear RNA binding protein B                                |
| XP_009692285.1 | 0.0382941  | 0.908634   | 0.0421447    | 0.0169487  | 0.741994   | 0.0228421    | 0.032493   | DEAD-box family RNA-dependent helicase                       |
| XP_009692286.1 | 0.123048   | 0.912749   | 0.13481      |            |            |              | 0.13481    | conserved hypothetical protein                               |
| XP_009692287.1 | 0.0121434  | 0.203348   | 0.0597172    |            |            |              | 0.0597172  | cytosol aminopeptidase                                       |
| XP_009692288.1 | 0.0599231  | 0.439003   | 0.136498     | 0.0483221  | 0.506991   | 0.0953117    | 0.115905   | conserved hypothetical protein                               |
| XP_009692289.1 | 0.0532598  | 0.590979   | 0.0901213    |            |            |              | 0.0901213  | uncharacterized protein                                      |
| XP_009692290.1 | 0.0668777  | 0.815705   | 0.0819875    | 0.0559138  | 0.727583   | 0.0768487    | 0.079418   | uncharacterized protein                                      |
| XP_009692291.1 | 0.0134322  | 0.555528   | 0.0241791    | 0.0121916  | 0.573366   | 0.0212631    | 0.022721   | conserved hypothetical protein                               |
| XP_009692292.1 | 0.181472   | 0.429083   | 0.42293      | 0.118935   | 0.347656   | 0.342106     | 0.382518   | uncharacterized protein                                      |
| XP_009692293.1 | 0.0472003  | 0.631376   | 0.0747577    | 0.0680813  | 0.613458   | 0.11098      | 0.092869   | predicted protein                                            |
| XP_009692294.1 | 0.0335789  | 0.459591   | 0.0730627    | 0.0420313  | 0.362648   | 0.115901     | 0.094482   | mitochondrial carrier protein                                |
| XP_009692295.1 | 0.0478978  | 0.115518   | 0.414636     | 0.0420474  | 0.244706   | 0.171829     | 0.293233   | mitochondrial carrier protein                                |
| XP_009692296.1 | 0.019418   | 0.758219   | 0.02561      | 0.00622722 | 0.461935   | 0.0134807    | 0.019545   | serine/threonine protein kinase                              |
| XP_009692297.1 | 0.00394962 | 0.439158   | 0.00899364   |            |            |              | 0.00899364 | predicted protein                                            |
| XP_009692298.1 | 0.0214053  | 1.21217    | 0.0176586    | 0.0225078  | 1.06626    | 0.0211091    | 0.019384   | uncharacterized protein                                      |
| XP_009692299.1 | 0.0296623  | 0.659619   | 0.0449689    | 0.0240983  | 0.658152   | 0.0366151    | 0.040792   | uncharacterized protein                                      |
| XP_009692301.1 | 0.0613722  | 0.494827   | 0.124028     | 0.0548755  | 0.451869   | 0.121441     | 0.122734   | prohibitin-like protein                                      |
| XP_009692302.1 | 0.023076   | 0.303571   | 0.0760152    | 0.0229091  | 0.399873   | 0.0572909    | 0.066653   | uncharacterized protein                                      |
| XP_009692303.1 | 0.0845336  | 0.514528   | 0.164293     |            |            |              | 0.164293   | uncharacterized protein                                      |
| XP_009692304.1 | 0.0481659  | 0.196166   | 0.245537     |            |            |              | 0.245537   | uncharacterized protein                                      |
| XP_009692305.1 | 0.0119538  | 0.719969   | 0.0166032    | 0.0119942  | 0.813712   | 0.0147401    | 0.015672   | small GTPase                                                 |
| XP_009692306.1 | 0.0396499  | 0.827411   | 0.0479204    | 0.0425894  | 0.945212   | 0.045058     | 0.046489   | importin-alpha                                               |
| XP_009692307.1 | 0.0484978  | 0.803479   | 0.0603598    | 0.0133494  | 0.350346   | 0.0381035    | 0.049232   | uncharacterized protein                                      |
| XP_009692309.1 |            |            |              | 0.10585    | 0.70879    | 0.14934      | 0.14934    | uncharacterized protein                                      |
| XP_009692310.1 | 0.0817769  | 0.768114   | 0.106464     | 0.110383   | 0.717315   | 0.153883     | 0.130173   | uncharacterized protein                                      |
| XP_009692311.1 | 0.114281   | 0.744606   | 0.153479     | 0.0967833  | 0.653182   | 0.148172     | 0.150826   | uncharacterized protein                                      |
| XP_009692312.1 | 0.0133209  | 0.579868   | 0.0229722    | 0.0266314  | 0.644022   | 0.0413517    | 0.032162   | conserved hypothetical protein                               |
| XP_009692314.1 | 0.0775744  | 0.82557    | 0.0939646    | 0.0514632  | 0.538469   | 0.0955732    | 0.094769   | uncharacterized protein                                      |
| XP_009692315.1 | 0.0856582  | 0.859185   | 0.099697     | 0.0915321  | 0.794774   | 0.115167     | 0.107432   | uncharacterized protein                                      |
| XP_009692316.1 | 0.035348   | 1.69111    | 0.0209022    | NA         | NA         | NA           | NA         | RNA polymerase small subunit                                 |
| XP_009692317.1 | 0.0539653  | 0.313958   | 0.171887     | 0.0753047  | 0.424216   | 0.177515     | 0.174701   | uncharacterized protein                                      |
| XP_009692318.1 | 0.0538439  | 0.80273    | 0.0670759    | 0.0504827  | 0.626562   | 0.0805708    | 0.073823   | conserved hypothetical protein                               |
| XP_009692319.1 | 0.0461676  | 0.728934   | 0.0633358    | 0.0479951  | 0.713775   | 0.0672412    | 0.065288   | conserved hypothetical protein                               |
| XP_009692321.1 |            |            |              | 0.0762359  | 1.04955    | 0.0726369    | 0.0726369  | conserved hypothetical protein                               |
| XP_009692324.1 | 0.0726696  | 0.937448   | 0.0775186    | 0.0958046  | 0.963612   | 0.0994224    | 0.08847    | uncharacterized protein                                      |
| XP_009692325.1 | 0.0450654  | 1.02577    | 0.0439333    | 0.0351981  | 0.991445   | 0.0355019    | 0.039718   | myosin light chain kinase                                    |
| XP_009692326.1 | 0.065937   | 0.658113   | 0.100191     | 0.0529839  | 0.554772   | 0.0955056    | 0.097848   | conserved hypothetical protein                               |
| XP_009692327.1 | 0.108352   | 0.883934   | 0.12258      | 0.0952798  | 0.736802   | 0.129315     | 0.125947   | uncharacterized protein                                      |
| XP_009692328.1 | 0.0433456  | 0.630097   | 0.068792     | 0.0333703  | 0.522969   | 0.0638093    | 0.066301   | translation elongation factor EF-1 subunit alpha             |
| XP_009692329.1 | 0.0312149  | 0.501411   | 0.062254     | 0.0249943  | 0.499976   | 0.0499909    | 0.056122   | elongation factor subunit                                    |
| XP_009692330.1 | 0.0698112  | 0.728905   | 0.0957755    | 0.0638552  | 1.43183    | 0.0445968    | 0.070186   | uncharacterized protein                                      |
| XP_009692331.1 | 0.0357082  | 0.387033   | 0.0922613    | 0.0508454  | 0.308826   | 0.164641     | 0.128451   | uncharacterized protein                                      |
| XP_009692332.1 | 0.0605038  | 0.592839   | 0.102058     | 0.0530642  | 0.691727   | 0.0767126    | 0.089385   | DNA replication protein                                      |
| XP_009692333.1 | 0.0561437  | 1.03233    | 0.0543856    | 0.0384217  | 0.93345    | 0.041161     | 0.047773   | conserved hypothetical protein                               |
| XP_009692334.1 | 0.0789695  | 1.37773    | 0.0573185    | 0.0818255  | 1.1976     | 0.0683245    | 0.062822   | silencing mediator for retinoid and thyroid hormone receptor |
| XP_009692335.1 | 0.0359024  | 0.337802   | 0.106282     | 0.0332136  | 0.450075   | 0.0737958    | 0.090039   | uncharacterized protein                                      |

| protein_id     | Chitose_ka  | Chitose_ks | Chitose_kaks | Buffeli_ka  | Buffeli_ks | Buffeli_kaks | mean_kaks | function                                                               |
|----------------|-------------|------------|--------------|-------------|------------|--------------|-----------|------------------------------------------------------------------------|
| XP_009692336.1 |             |            |              | 0.0169901   | 0.0727275  | 0.233613     | 0.233613  | conserved hypothetical protein                                         |
| XP_009692337.1 | 0.0148819   | 0.387254   | 0.0384294    | 0.00907383  | 0.329069   | 0.0275743    | 0.033002  | bifunctional dihydrofolate reductase/thymidilate synthase              |
| XP_009692338.1 | 0.0499512   | 0.454791   | 0.109833     |             |            |              | 0.109833  | conserved hypothetical protein                                         |
| XP_009692339.1 | 0.019108    | 0.589702   | 0.0324027    | 0.015398    | 0.573046   | 0.0268705    | 0.029637  | conserved hypothetical protein                                         |
| XP_009692340.1 | 0.0501948   | 0.339525   | 0.147839     | 0.0623154   | 0.525707   | 0.118536     | 0.133188  | conserved hypothetical protein                                         |
| XP_009692341.1 | 0.0634332   | 0.725833   | 0.0873938    | 0.050745    | 0.680979   | 0.0745178    | 0.080956  | DNA helicase                                                           |
| XP_009692342.1 | 0.0552206   | 0.752657   | 0.0733676    | 0.0471229   | 0.586464   | 0.0803509    | 0.076859  | chromosome maintenance protein                                         |
| XP_009692343.1 | 0.032525    | 0.60653    | 0.0536247    | 0.0290513   | 0.346316   | 0.0838866    | 0.068756  | conserved hypothetical protein                                         |
| XP_009692344.1 | 0.027326    | 0.524807   | 0.0520686    | 0.0284302   | 0.467189   | 0.0608537    | 0.056461  | conserved hypothetical protein                                         |
| XP_009692345.1 | 0.0306915   | 0.76737    | 0.0399957    | 0.0406356   | 0.932482   | 0.0435779    | 0.041787  | uncharacterized protein                                                |
| XP_009692346.1 | 0.0173637   | 0.326189   | 0.053232     | 0.0287455   | 0.402291   | 0.0714547    | 0.062343  | uncharacterized protein                                                |
| XP_009692347.1 | 0.0155142   | 0.779878   | 0.0198931    | 0.00602538  | 0.537522   | 0.0112095    | 0.015551  | metallopeptidase                                                       |
| XP_009692348.1 | 0.0370216   | 0.843587   | 0.0438859    | 0.043939    | 0.977831   | 0.0449352    | 0.044411  | 60S ribosomal protein L6                                               |
| XP_009692349.1 | 0.0391929   | 1.03042    | 0.0380358    | 0.0259032   | 1.22157    | 0.0212049    | 0.02962   | elongation factor 1-gamma                                              |
| XP_009692350.1 | 0.036577    | 0.569715   | 0.0642022    | 0.0260512   | 0.570643   | 0.0456524    | 0.054927  | uncharacterized protein                                                |
| XP_009692351.1 | 0.0276055   | 0.254027   | 0.108671     | 0.108671    | 0.0330807  | 0.107289     | 0.10798   | conserved hypothetical protein                                         |
| XP_009692352.1 | 0.0551263   | 0.628144   | 0.0877606    | 0.0419048   | 0.487344   | 0.0859861    | 0.086873  | conserved hypothetical protein                                         |
| XP_009692353.1 | 0.029941    | 0.158033   | 0.18946      |             |            |              | 0.18946   | uncharacterized protein                                                |
| XP_009692354.1 | 0.0319155   | 0.574532   | 0.0555504    | 0.0297659   | 0.517757   | 0.0574901    | 0.05652   | uncharacterized protein                                                |
| XP_009692355.1 | 0.134367    | 0.214868   | 0.625346     | NA          | NA         | NA           | NA        | hypothetical protein                                                   |
| XP_009692356.1 | 0.0642683   | 0.115417   | 0.556834     | 0.169689    | 0.139977   | 1.21226      | 0.884547  | hypothetical protein                                                   |
| XP_009692357.1 | 0.113749    | 0.945368   | 0.120322     | 0.0869063   | 1.04552    | 0.0831227    | 0.101722  | conserved hypothetical protein                                         |
| XP_009692358.1 | 0.0858793   | 0.700844   | 0.122537     | 0.0916834   | 0.688682   | 0.133129     | 0.127833  | uncharacterized protein                                                |
| XP_009692359.1 | 0.0339168   | 0.742235   | 0.0456955    | 0.0354325   | 0.837479   | 0.0423085    | 0.044002  | conserved hypothetical protein                                         |
| XP_009692360.1 | 0.0235404   | 0.517946   | 0.0454495    | 0.0179236   | 0.688472   | 0.0260339    | 0.035742  | uncharacterized protein                                                |
| XP_009692361.1 | 0.000456793 | 0.456793   | 0.001        | 0.000441675 | 0.441675   | 0.001        | 0.001     | putative 60S Ribosomal protein L44                                     |
| XP_009692362.1 | 0.101518    | 0.575573   | 0.176377     | 0.0899781   | 0.603363   | 0.149128     | 0.162753  | uncharacterized protein                                                |
| XP_009692363.1 | 0.0709855   | 0.627352   | 0.113151     | 0.0644303   | 0.780971   | 0.0825002    | 0.097826  | uncharacterized protein                                                |
| XP_009692364.1 | 0.000518429 | 0.518429   | 0.001        | 0.0141156   | 0.798966   | 0.0176673    | 0.009334  | uncharacterized protein                                                |
| XP_009692365.1 | 0.0177217   | 0.760774   | 0.0232944    | 0.0107406   | 0.588571   | 0.0182486    | 0.020771  | dimethyladenosine transferase                                          |
| XP_009692366.1 | 0.011887    | 0.373415   | 0.0318334    | 0.0107895   | 0.41078    | 0.026266     | 0.02905   | phosphorylase phosphatase                                              |
| XP_009692367.1 | 0.0643933   | 0.650541   | 0.0989842    | 0.0694729   | 0.574398   | 0.120949     | 0.109967  | uncharacterized protein                                                |
| XP_009692368.1 | 0.0482535   | 0.612626   | 0.0787651    | 0.0445814   | 0.6192     | 0.0719984    | 0.075382  | RNA polymerases I and III subunit                                      |
| XP_009692369.1 | 0.0916612   | 0.583922   | 0.156975     | 0.0476451   | 0.381105   | 0.125019     | 0.140997  | lysyl-tRNA synthetase                                                  |
| XP_009692371.1 | 0.0797384   | 0.285118   | 0.279668     | 0.0774765   | 0.363573   | 0.213097     | 0.246383  | conserved hypothetical protein                                         |
| XP_009692372.1 | 0.0542147   | 0.469524   | 0.115467     |             |            |              | 0.115467  | conserved hypothetical protein                                         |
| XP_009692373.1 | 0.0322      | 0.675679   | 0.0476558    | 0.0303308   | 0.72058    | 0.0420923    | 0.044874  | pre-mRNA splicing complex subunit                                      |
| XP_009692374.1 | 0.0921065   | 0.778151   | 0.118366     | 0.0754087   | 0.350274   | 0.215285     | 0.166826  | triosephosphate isomerase                                              |
| XP_009692375.1 | 0.0504786   | 0.495377   | 0.101899     | 0.0403501   | 0.321657   | 0.125444     | 0.113672  | conserved hypothetical protein                                         |
| XP_009692376.1 | 0.0683732   | 0.63327    | 0.107968     | 0.0662975   | 0.733867   | 0.0903399    | 0.099154  | conserved hypothetical protein                                         |
| XP_009692377.1 | 0.211855    | 0.205755   | 1.02964      | 0.0401281   | 0.118478   | 0.338696     | 0.684168  | hypothetical protein                                                   |
| XP_009692378.1 | 0.0385817   | 0.436224   | 0.0884446    | 0.0253826   | 0.411555   | 0.0616748    | 0.07506   | vesicle-associated membrane protein                                    |
| XP_009692379.1 | 0.000250823 | 0.250823   | 0.001        | 0.000994045 | 0.994045   | 0.001        | 0.001     | RNA polymerase common subunit                                          |
| XP_009692380.1 | 0.0384455   | 0.687402   | 0.0559287    | 0.044909    | 0.669056   | 0.0671229    | 0.061526  | uncharacterized protein                                                |
| XP_009692381.1 | 0.0319333   | 0.371331   | 0.0859969    | 0.035254    | 0.407439   | 0.0865257    | 0.086261  | uncharacterized protein                                                |
| XP_009692382.1 | 0.106859    | 0.588184   | 0.181676     | 0.103029    | 0.352702   | 0.292113     | 0.236895  | uncharacterized protein                                                |
| XP_009692383.1 | 0.0318937   | 0.53924    | 0.0591457    | 0.0193776   | 0.433722   | 0.0446774    | 0.051912  | branched-chain alpha-keto acid dihydrolipoyl acyltransferase precursor |
| XP_009692384.1 | 0.00888369  | 0.320223   | 0.0277422    | 0.0104977   | 0.167092   | 0.0628257    | 0.045284  | membrane skeletal protein IMC1                                         |
| XP_009692385.1 | 0.0885527   | 0.552611   | 0.160244     | 0.0795592   | 0.616863   | 0.128974     | 0.144609  | conserved hypothetical protein                                         |
| XP_009692386.1 | 0.0594096   | 0.754848   | 0.078704     | 0.0608378   | 0.664012   | 0.0916215    | 0.085163  | uncharacterized protein                                                |
| XP_009692387.1 | 0.0537723   | 0.264963   | 0.202942     | 0.0363149   | 0.326648   | 0.111174     | 0.157058  | uncharacterized protein                                                |
| XP_009692388.1 | 0.0535482   | 0.398007   | 0.134541     | 0.0447652   | 0.411901   | 0.10868      | 0.12161   | conserved hypothetical protein                                         |
| XP_009692389.1 | 0.0285233   | 0.575909   | 0.0495274    | 0.0127916   | 0.341515   | 0.0374553    | 0.043491  | conserved hypothetical protein                                         |

| protein_id     | Chitose_ka  | Chitose_ks | Chitose_kaks | Buffeli_ka  | Buffeli_ks | Buffeli_kaks | mean_kaks | function                                 |
|----------------|-------------|------------|--------------|-------------|------------|--------------|-----------|------------------------------------------|
| XP_009692390.1 | 0.10194     | 0.515109   | 0.197901     | 0.0766682   | 0.398617   | 0.192336     | 0.195119  | uncharacterized protein                  |
| XP_009692391.1 | 0.0711411   | 0.713276   | 0.0997385    | 0.0561443   | 0.638649   | 0.087911     | 0.093825  | conserved hypothetical protein           |
| XP_009692392.1 | 0.0368351   | 0.566548   | 0.0650167    | 0.028128    | 0.607116   | 0.0463306    | 0.055674  | conserved hypothetical protein           |
| XP_009692393.1 | 0.0293353   | 0.790733   | 0.0370989    | 0.021689    | 1.49701    | 0.0144883    | 0.025794  | uncharacterized protein                  |
| XP_009692394.1 | 0.0361349   | 0.440963   | 0.0819455    | 0.0475766   | 0.792151   | 0.0600601    | 0.071003  | uncharacterized protein                  |
| XP_009692395.1 | 0.0138923   | 0.229375   | 0.0605658    | 0.0240791   | 0.370377   | 0.0650124    | 0.062789  | uncharacterized protein                  |
| XP_009692396.1 | 0.0519541   | 0.67361    | 0.0771279    | 0.0232746   | 0.709741   | 0.0327931    | 0.05496   | conserved hypothetical protein           |
| XP_009692397.1 | 0.0530664   | 0.51386    | 0.10327      | 0.059049    | 0.647822   | 0.09115      | 0.09721   | conserved hypothetical protein           |
| XP_009692398.1 | 0.00498838  | 0.597096   | 0.00835441   | 0.00775825  | 0.751301   | 0.0103264    | 0.00934   | vacuolar ATP synthase subunit beta       |
| XP_009692399.1 | 0.0143134   | 0.328046   | 0.0436324    | 0.00466979  | 0.369486   | 0.0126386    | 0.028136  | conserved hypothetical protein           |
| XP_009692400.1 | 0.192508    | 0.64212    | 0.2998       |             |            |              | 0.2998    | uncharacterized protein                  |
| XP_009692401.1 | 0.0190931   | 0.429356   | 0.0444692    | 0.026702    | 0.400243   | 0.0667146    | 0.055592  | uncharacterized protein                  |
| XP_009692402.1 | 0.0381749   | 0.530048   | 0.0720217    | 0.0357754   | 0.641547   | 0.0557643    | 0.063893  | conserved hypothetical protein           |
| XP_009692403.1 | 0.12124     | 0.673973   | 0.179889     | 0.126724    | 0.834282   | 0.151896     | 0.165892  | uncharacterized protein                  |
| XP_009692404.1 | 0.202852    | 0.197017   | 1.02961      | 0.13124     | 0.242068   | 0.542164     | 0.785887  | hypothetical protein                     |
| XP_009692405.1 | 0.0102353   | 0.442488   | 0.0231312    | 0.00832033  | 0.493906   | 0.016846     | 0.019989  | vacuolar ATP synthase                    |
| XP_009692406.1 | 0.0636483   | 0.920556   | 0.0691411    | 0.0609777   | 1.06039    | 0.0575052    | 0.063323  | conserved hypothetical protein           |
| XP_009692407.1 | 0.0211136   | 0.41255    | 0.0511782    | 0.0189992   | 0.444519   | 0.042741     | 0.04696   | uncharacterized protein                  |
| XP_009692408.1 | 0.04398     | 0.493053   | 0.0891992    | 0.0659545   | 0.714088   | 0.0923619    | 0.090781  | conserved hypothetical protein           |
| XP_009692409.1 | 0.0723901   | 0.580146   | 0.124779     | 0.0705241   | 0.544212   | 0.129589     | 0.127184  | uncharacterized protein                  |
| XP_009692410.1 | 0.0356728   | 0.386884   | 0.0922055    | 0.0380847   | 0.363306   | 0.104828     | 0.098517  | conserved hypothetical protein           |
| XP_009692411.1 | 0.0118216   | 0.243359   | 0.0485768    | 0.00914466  | 0.210679   | 0.0434056    | 0.045991  | 60S ribosomal subunit biogenesis protein |
| XP_009692412.1 | 0.0368959   | 0.225884   | 0.16334      |             |            |              | 0.16334   | conserved hypothetical protein           |
| XP_009692413.1 | 0.0184922   | 0.71775    | 0.0257641    | 0.0202874   | 0.574629   | 0.0353052    | 0.030535  | conserved hypothetical protein           |
| XP_009692414.1 | 0.1596      | 0.89298    | 0.178727     | 0.150326    | 0.939753   | 0.159963     | 0.169345  | uncharacterized protein                  |
| XP_009692415.1 | 0.107373    | 0.920155   | 0.11669      | 0.105596    | 0.562476   | 0.187735     | 0.152213  | uncharacterized protein                  |
| XP_009692416.1 | 0.139942    | 0.716381   | 0.195345     | 0.222643    | 0.913686   | 0.243676     | 0.21951   | uncharacterized protein                  |
| XP_009692417.1 | 0.0130477   | 0.535516   | 0.0243646    | 0.0129051   | 0.572157   | 0.0225551    | 0.02346   | 26S proteasome regulatory subunit        |
| XP_009692418.1 | 0.00545677  | 0.356437   | 0.0153092    | 0.00900734  | 0.316948   | 0.028419     | 0.021864  | serine/threonine protein phosphatase     |
| XP_009692419.1 | 0.0525058   | 0.54028    | 0.0971826    | 0.0686631   | 0.428894   | 0.160093     | 0.128638  | conserved hypothetical protein           |
| XP_009692420.1 | 0.00594127  | 0.678645   | 0.00875461   | 0.00205517  | 0.570878   | 0.00360002   | 0.006177  | 40S ribosomal protein S3                 |
| XP_009692421.1 | 0.105017    | 0.238925   | 0.439541     | 0.083331    | 0.188023   | 0.443196     | 0.441368  | conserved hypothetical protein           |
| XP_009692422.1 | 0.0262007   | 0.336176   | 0.0779375    | 0.00628098  | 0.230215   | 0.0272832    | 0.05261   | conserved hypothetical protein           |
| XP_009692423.1 | 0.020626    | 0.282072   | 0.0731232    |             |            |              | 0.0731232 | conserved hypothetical protein           |
| XP_009692424.1 | 0.0614002   | 0.354859   | 0.173027     | 0.060311    | 0.301002   | 0.200367     | 0.186697  | conserved hypothetical protein           |
| XP_009692425.1 | 0.0579527   | 0.449614   | 0.128894     | 0.0548417   | 0.429112   | 0.127803     | 0.128349  | tRNA 3' processing endoribonuclease      |
| XP_009692426.1 | 0.0610926   | 0.608092   | 0.100466     | 0.0469194   | 0.604707   | 0.0775904    | 0.089028  | conserved hypothetical protein           |
| XP_009692427.1 | 0.0705757   | 0.788219   | 0.0895382    | 0.0641252   | 0.726939   | 0.0882125    | 0.088875  | conserved hypothetical protein           |
| XP_009692428.1 | 0.0371506   | 0.423057   | 0.0878147    | 0.0449491   | 0.438397   | 0.102531     | 0.095173  | conserved hypothetical protein           |
| XP_009692429.1 | 0.0634388   | 0.461536   | 0.137452     | 0.057154    | 0.456896   | 0.125092     | 0.131272  | conserved hypothetical protein           |
| XP_009692430.1 | 0.0748826   | 0.52659    | 0.142203     | 0.0657108   | 0.60754    | 0.108159     | 0.125181  | serine/threonine protein phosphatase 2C  |
| XP_009692431.1 | 0.0510879   | 0.918097   | 0.0556454    | 0.0490613   | 1.07522    | 0.0456291    | 0.050637  | chromosome segregation protein           |
| XP_009692432.1 | 0.131894    | 0.393856   | 0.334879     | 0.098111    | 0.392985   | 0.249656     | 0.292268  | conserved hypothetical protein           |
| XP_009692433.1 | 6.93153E-05 | 0.0693153  | 0.001        | 3.12145E-05 | 0.0312145  | 0.001        | 0.001     | histone H2B                              |
| XP_009692434.1 | 0.115159    | 0.326604   | 0.352595     | 0.0836194   | 0.34064    | 0.245477     | 0.299036  | conserved hypothetical protein           |
| XP_009692435.1 | 0.0354888   | 0.412781   | 0.0859749    | 0.0401149   | 0.416038   | 0.0964212    | 0.091198  | DNA-binding chaperone                    |
| XP_009692436.1 | 0.11367     | 0.204574   | 0.555643     | 0.094062    | 0.33       | 0.285036     | 0.420339  | hypothetical protein                     |
| XP_009692437.1 | 0.0513743   | 0.761934   | 0.0674262    | 0.0537639   | 0.822092   | 0.0653988    | 0.066413  | uncharacterized protein                  |
| XP_009692438.1 | 0.109605    | 0.548821   | 0.19971      | 0.0759741   | 0.508495   | 0.14941      | 0.17456   | conserved hypothetical protein           |
| XP_009692439.1 | 0.0846763   | 0.713595   | 0.118662     | 0.0685362   | 0.664743   | 0.103102     | 0.110882  | conserved hypothetical protein           |
| XP_009692440.1 | 0.206522    | 0.173556   | 1.18994      | 0.109192    | 0.0612308  | 1.78329      | 1.486615  | hypothetical protein                     |
| XP_009692441.1 | 0.0364538   | 0.315436   | 0.115566     | 0.0275573   | 0.290314   | 0.0949226    | 0.105244  | uncharacterized protein                  |
| XP_009692442.1 | 0.0195323   | 0.417739   | 0.0467571    | 0.0193174   | 0.4306     | 0.0448616    | 0.045809  | uncharacterized protein                  |

| protein_id     | Chitose_ka  | Chitose_ks | Chitose_kaks | Buffeli_ka  | Buffeli_ks | Buffeli_kaks | mean_kaks | function                                 |
|----------------|-------------|------------|--------------|-------------|------------|--------------|-----------|------------------------------------------|
| XP_009692443.1 | 0.0211963   | 0.469104   | 0.0451846    | 0.0109736   | 0.473892   | 0.0231564    | 0.03417   | 26S proteasome regulatory subunit        |
| XP_009692445.1 | 0.0158261   | 0.256988   | 0.0615829    | 0.0246942   | 0.359419   | 0.0687057    | 0.065144  | Ser/Arg-rich splicing factor             |
| XP_009692446.1 | 0.0743948   | 0.592424   | 0.125577     | 0.0501096   | 0.598627   | 0.0837075    | 0.104642  | uncharacterized protein                  |
| XP_009692447.1 | 0.0228349   | 0.431607   | 0.0529067    | 0.0281195   | 0.498688   | 0.056387     | 0.054647  | uncharacterized protein                  |
| XP_009692448.1 | 7.94182E-05 | 0.0794182  | 0.001        | 0.000111704 | 0.111704   | 0.001        | 0.001     | histone H3                               |
| XP_009692449.1 | 0.000193773 | 0.193773   | 0.001        | 0.00013739  | 0.13739    | 0.001        | 0.001     | late histone H2A.2.2                     |
| XP_009692450.1 | 0.0574968   | 0.667607   | 0.0861237    | 0.060017    | 0.641732   | 0.0935234    | 0.089824  | transcription factor                     |
| XP_009692451.1 | 0.0443898   | 0.54017    | 0.0821774    | 0.0230958   | 0.412335   | 0.0560123    | 0.069095  | ribosomal protein L19                    |
| XP_009692452.1 | 0.0229688   | 0.509043   | 0.0451217    |             |            |              | 0.0451217 | splicing factor                          |
| XP_009692453.1 | 0.0270553   | 0.503677   | 0.0537156    | 0.0144086   | 0.548592   | 0.0262647    | 0.03999   | uncharacterized protein                  |
| XP_009692454.1 | 0.147796    | 0.500832   | 0.295101     | 0.14612     | 0.549922   | 0.26571      | 0.280405  | conserved hypothetical protein           |
| XP_009692455.1 | 0.031446    | 0.496905   | 0.0632836    | 0.0250388   | 0.369026   | 0.067851     | 0.065567  | cardiolipin synthetase                   |
| XP_009692456.1 | 0.135517    | 0.629941   | 0.215127     | 0.11483     | 0.61312    | 0.187288     | 0.201208  | hypothetical protein                     |
| XP_009692457.1 | 0.0278472   | 0.406183   | 0.0685583    | 0.027986    | 0.379765   | 0.0736929    | 0.071126  | uncharacterized protein                  |
| XP_009692458.1 | 0.0240515   | 0.786374   | 0.0305853    | 0.0201285   | 0.611755   | 0.0329028    | 0.031744  | DNA-directed RNA polymerase              |
| XP_009692459.1 | 0.0359088   | 0.588123   | 0.0610566    | 0.0525597   | 0.533576   | 0.0985047    | 0.079781  | MAC/perforin                             |
| XP_009692460.1 | 0.0455544   | 0.290167   | 0.156994     | 0.0563379   | 0.320942   | 0.175539     | 0.166266  | MAC/perforin                             |
| XP_009692461.1 | 0.00777007  | 0.379821   | 0.0204572    | 0.012414    | 0.371218   | 0.0334413    | 0.026949  | uncharacterized protein                  |
| XP_009692462.1 | 0.141755    | 0.549585   | 0.257931     | 0.110872    | 0.405522   | 0.273405     | 0.265668  | conserved hypothetical protein           |
| XP_009692463.1 | 0.0113339   | 0.922827   | 0.0122817    | 0.00741642  | 0.952651   | 0.00778503   | 0.010033  | DNA-directed RNA polymerase              |
| XP_009692464.1 | 0.100641    | 0.620286   | 0.162249     | 0.146269    | 0.603423   | 0.242399     | 0.202324  | conserved hypothetical protein           |
| XP_009692465.1 | 0.0650213   | 0.485448   | 0.133941     | 0.0814638   | 0.599448   | 0.135898     | 0.134919  | uncharacterized protein                  |
| XP_009692466.1 | 0.0122779   | 0.57634    | 0.0213032    | 0.0121186   | 0.748351   | 0.0161937    | 0.018748  | uncharacterized protein                  |
| XP_009692467.1 | 0.0700294   | 1.01428    | 0.0690437    | 0.0605442   | 0.962624   | 0.062895     | 0.065969  | uncharacterized protein                  |
| XP_009692468.1 | 0.0592548   | 0.492154   | 0.120399     | 0.0732117   | 0.552399   | 0.132534     | 0.126467  | uncharacterized protein                  |
| XP_009692469.1 | 0.179059    | 0.59588    | 0.300495     | 0.132585    | 0.4496     | 0.294896     | 0.297696  | conserved hypothetical protein           |
| XP_009692470.1 | 0.0526926   | 0.376355   | 0.140008     | 0.0826381   | 0.31875    | 0.259257     | 0.199632  | ubiquinol-cytochrome c reductase complex |
| XP_009692471.1 | 0.0148182   | 0.704968   | 0.0210197    | 0.011287    | 0.656192   | 0.0172008    | 0.01911   | U4/U6-associated splicing factor         |
| XP_009692472.1 | 0.00946487  | 0.166987   | 0.0566803    |             |            |              | 0.0566803 | snoRNP protein                           |
| XP_009692473.1 | 0.0211169   | 0.280525   | 0.0752763    | 0.0280795   | 0.295139   | 0.0951399    | 0.085208  | ribosomal RNA methyltransferase          |
| XP_009692474.1 | 0.0895579   | 0.542333   | 0.165135     | 0.0714666   | 0.550194   | 0.129893     | 0.147514  | methylase                                |
| XP_009692475.1 | 0.0921448   | 0.65682    | 0.140289     | 0.0887054   | 0.764437   | 0.11604      | 0.128165  | conserved hypothetical protein           |
| XP_009692476.1 | 0.103267    | 0.612591   | 0.168574     | 0.118592    | 0.510532   | 0.232291     | 0.200433  | conserved hypothetical protein           |
| XP_009692477.1 | 0.0427909   | 0.614549   | 0.0696298    | 0.0288252   | 0.561397   | 0.0513455    | 0.060488  | predicted protein                        |
| XP_009692478.1 | 0.0163899   | 0.133686   | 0.1226       | 8.65782E-05 | 0.0865782  | 0.001        | 0.0618    | snRNP protein                            |
| XP_009692479.1 | 0.0968447   | 0.458706   | 0.211126     | 0.0868075   | 0.424445   | 0.20452      | 0.207823  | conserved hypothetical protein           |
| XP_009692480.1 | 0.033812    | 0.367056   | 0.0921168    | 0.0398794   | 0.535706   | 0.0744428    | 0.08328   | microfibrillar-associated protein        |
| XP_009692481.1 | 0.0969306   | 0.355447   | 0.272701     | 0.10379     | 0.394471   | 0.263112     | 0.267907  | conserved hypothetical protein           |
| XP_009692482.1 | 0.0290179   | 0.485838   | 0.0597276    | 0.0306773   | 0.436404   | 0.0702957    | 0.065012  | uncharacterized protein                  |
| XP_009692483.1 | 0.0127848   | 0.70212    | 0.0182088    | 0.0117186   | 0.670852   | 0.0174682    | 0.017839  | Ran-binding protein                      |
| XP_009692484.1 | 0.0295029   | 0.677098   | 0.0435725    | 0.0280888   | 0.600532   | 0.0467732    | 0.045173  | DEAD-box family helicase                 |
| XP_009692485.1 | 0.0944584   | 0.480065   | 0.196762     | 0.0886412   | 0.476615   | 0.185981     | 0.191371  | uncharacterized protein                  |
| XP_009692486.1 | 0.00504211  | 0.312716   | 0.0161236    | 0.0160101   | 0.450887   | 0.0355079    | 0.025816  | proteasome subunit alpha type            |
| XP_009692487.1 | 0.0321472   | 0.528465   | 0.0608314    | 0.0171935   | 0.456958   | 0.0376259    | 0.049229  | tyrosyl-tRNA synthetase                  |
| XP_009692488.1 | 0.0133575   | 0.465917   | 0.0286692    | 0.0159089   | 0.499559   | 0.031846     | 0.030258  | conserved hypothetical protein           |
| XP_009692489.1 | 0.0495971   | 0.696674   | 0.0711913    | 0.042932    | 0.435673   | 0.0985419    | 0.084867  | exoribonuclease                          |
| XP_009692490.1 | 0.0949685   | 0.657746   | 0.144385     | 0.103135    | 0.507356   | 0.203279     | 0.173832  | conserved hypothetical protein           |
| XP_009692491.1 | 0.0590755   | 0.660348   | 0.0894611    | 0.0504746   | 0.523501   | 0.0964174    | 0.092939  | condensin subunit                        |
| XP_009692492.1 | 0.0520774   | 0.724842   | 0.0718467    | 0.0367993   | 0.727258   | 0.0506       | 0.061223  | conserved hypothetical protein           |
| XP_009692493.1 | 0.0652864   | 0.608445   | 0.1073       | 0.0494363   | 0.613987   | 0.0805168    | 0.093908  | conserved hypothetical protein           |
| XP_009692494.1 | 0.0557598   | 0.498764   | 0.111796     | 0.0462115   | 0.434181   | 0.106434     | 0.109115  | uncharacterized protein                  |
| XP_009692495.1 | 0.021033    | 0.329088   | 0.063913     | 0.0142853   | 0.279904   | 0.0510366    | 0.057475  | GTPase-activating protein                |
| XP_009692496.1 | 0.0320595   | 0.429502   | 0.0746434    | 0.0191194   | 0.517225   | 0.0369653    | 0.055804  | conserved hypothetical protein           |

| protein_id     | Chitose_ka  | Chitose_ks | Chitose_kaks | Buffeli_ka  | Buffeli_ks | Buffeli_kaks | mean_kaks | function                                 |
|----------------|-------------|------------|--------------|-------------|------------|--------------|-----------|------------------------------------------|
| XP_009692497.1 | 0.0849023   | 0.56684    | 0.149782     | 0.0855502   | 0.544978   | 0.156979     | 0.153381  | uncharacterized protein                  |
| XP_009692498.1 | 0.0786122   | 0.137616   | 0.571245     |             |            |              | 0.571245  | conserved hypothetical protein           |
| XP_009692499.1 | 0.0705557   | 0.453726   | 0.155503     | 0.0507985   | 0.394941   | 0.128623     | 0.142063  | uncharacterized protein                  |
| XP_009692500.1 | 0.036958    | 0.494362   | 0.074759     | 0.0182483   | 0.534125   | 0.0341649    | 0.054462  | replication factor C subunit             |
| XP_009692501.1 | 0.124281    | 0.378884   | 0.328018     | 0.133619    | 0.342093   | 0.390593     | 0.359305  | uncharacterized protein                  |
| XP_009692502.1 | 0.00557131  | 0.745347   | 0.00747479   | 0.00508223  | 1.18099    | 0.00430336   | 0.005889  | glyceraldehyde-3-phosphate dehydrogenase |
| XP_009692503.1 | 0.0100851   | 0.723636   | 0.0139367    | 0.00693093  | 0.577053   | 0.0120109    | 0.012974  | cytochrome C1 precursor                  |
| XP_009692504.1 | 0.0353545   | 0.494685   | 0.0714687    | 0.0308385   | 0.512177   | 0.0602105    | 0.06584   | uncharacterized protein                  |
| XP_009692505.1 | 0.0450569   | 0.422693   | 0.106595     | 0.0284473   | 0.323251   | 0.0880036    | 0.097299  | syntaxin                                 |
| XP_009692506.1 | 0.0127356   | 0.268531   | 0.047427     | 0.0160717   | 0.257588   | 0.0623932    | 0.05491   | 60S ribosomal protein L13                |
| XP_009692507.1 | 0.0730684   | 0.558773   | 0.130766     | 0.073013    | 0.499146   | 0.146276     | 0.138521  | uncharacterized protein                  |
| XP_009692508.1 | 0.0232384   | 0.452003   | 0.0514119    | 0.0136802   | 0.386246   | 0.0354183    | 0.034315  | arginyl-tRNA synthetase                  |
| XP_009692509.1 | 0.04805     | 0.331319   | 0.145026     | 0.067667    | 0.406939   | 0.166283     | 0.155654  | conserved hypothetical protein           |
| XP_009692510.1 | 0.00968244  | 0.604103   | 0.0160278    | 0.0152174   | 0.439781   | 0.0346021    | 0.025315  | 50S ribosomal protein L14                |
| XP_009692511.1 | 0.000280176 | 0.280176   | 0.001        | 0.000279443 | 0.279443   | 0.001        | 0.001     | vacuolar H <sup>+</sup> -ATPase subunit  |
| XP_009692512.1 | 0.0482745   | 0.788309   | 0.061238     | 0.0633726   | 0.821951   | 0.0771002    | 0.069169  | uncharacterized protein                  |
| XP_009692513.1 | 0.000325334 | 0.325334   | 0.001        |             |            |              | 0.001     | proteasome subunit                       |
| XP_009692514.1 |             |            |              | 0.108054    | 0.444713   | 0.242975     | 0.242975  | conserved hypothetical protein           |
| XP_009692515.1 | 0.0230855   | 0.461415   | 0.050032     | 0.028191    | 0.343581   | 0.0820504    | 0.066041  | splicing factor                          |
| XP_009692516.1 | 0.0182249   | 0.463736   | 0.0393002    | 0.016673    | 0.436753   | 0.0381748    | 0.038738  | transcription modulator                  |
| XP_009692517.1 | 0.0424522   | 0.46007    | 0.0922735    | 0.0528756   | 0.419195   | 0.126136     | 0.109205  | conserved hypothetical protein           |
| XP_009692518.1 | 0.0926151   | 0.0290972  | 3.18295      | 0.217573    | 0.135223   | 1.609        | 2.395975  | hypothetical protein                     |
| XP_009692519.1 | 0.00538756  | 0.433319   | 0.0124332    | 0.00321115  | 0.258289   | 0.0124324    | 0.012433  | 40S ribosomal protein S9                 |
| XP_009692520.1 | 0.0662879   | 0.523921   | 0.126523     | 0.0777974   | 0.480045   | 0.162063     | 0.144293  | conserved hypothetical protein           |
| XP_009692521.1 | 0.0593819   | 0.438076   | 0.135552     | 0.0492445   | 0.362981   | 0.135667     | 0.135609  | conserved hypothetical protein           |
| XP_009692522.1 | 0.0764232   | 0.515665   | 0.148203     | 0.113071    | 0.462739   | 0.244352     | 0.196277  | uncharacterized protein                  |
| XP_009692523.1 | 0.0614091   | 0.385802   | 0.159172     | 0.0704161   | 0.331115   | 0.212664     | 0.185918  | conserved hypothetical protein           |
| XP_009692524.1 | 0.0847398   | 0.538601   | 0.157333     | 0.072855    | 0.482148   | 0.151105     | 0.154219  | cell surface/extracellular protein       |
| XP_009692525.1 | 0.00903012  | 0.299729   | 0.0301276    | 4.83984E-05 | 0.0483984  | 0.001        | 0.015564  | U6 snRNP protein Lsm2                    |
| XP_009692526.1 | 0.0541107   | 0.185514   | 0.29168      | 0.0521675   | 0.411594   | 0.126745     | 0.209212  | bis-(5'-nucleosyl)-tetraphosphatase      |
| XP_009692527.1 | 0.0342977   | 0.557036   | 0.0615718    | 0.0160356   | 0.343308   | 0.046709     | 0.05414   | uncharacterized protein                  |
| XP_009692528.1 | NA          | NA         | NA           | NA          | NA         | NA           | NA        | uncharacterized protein                  |
| XP_009692529.1 | 0.107805    | 0.511243   | 0.210868     | 0.104699    | 0.6243     | 0.167706     | 0.189287  | conserved hypothetical protein           |
| XP_009692530.1 | 0.0676002   | 0.310217   | 0.217913     |             |            |              | 0.217913  | uncharacterized protein                  |
| XP_009692532.1 | 0.0858777   | 0.484444   | 0.177271     | 0.106423    | 0.513917   | 0.207082     | 0.192177  | hypothetical protein                     |
| XP_009692533.1 | 0.0315749   | 0.406609   | 0.0776541    |             |            |              | 0.0776541 | uncharacterized protein                  |
| XP_009692534.1 | 0.0405126   | 0.808794   | 0.0500901    | 0.0359551   | 0.831106   | 0.0432618    | 0.046676  | coat protein%2C gamma subunit            |
| XP_009692535.1 | 0.00890619  | 0.260792   | 0.0341505    | 0.000239535 | 0.239535   | 0.001        | 0.017575  | CRIP1 protein                            |
| XP_009692536.1 | 0.022323    | 0.841653   | 0.0265229    | 0.022785    | 0.841666   | 0.0270713    | 0.026797  | dynamin                                  |
| XP_009692537.1 | 0.0591869   | 0.35777    | 0.165433     | 0.049459    | 0.27686    | 0.178642     | 0.172038  | conserved hypothetical protein           |
| XP_009692538.1 | 0.0132428   | 0.487113   | 0.0271862    | 0.0218442   | 0.516671   | 0.0422788    | 0.034732  | glycoprotein endopeptidase               |
| XP_009692539.1 | 0.019756    | 0.353929   | 0.0558192    | 0.0226468   | 0.235566   | 0.0961375    | 0.075978  | 26S proteasome subunit                   |
| XP_009692540.1 | 0.0326411   | 0.304464   | 0.107208     | 0.0290795   | 0.257015   | 0.113143     | 0.110175  | conserved hypothetical protein           |
| XP_009692541.1 | 0.0365046   | 0.0972646  | 0.375312     | 0.202756    | 0.262386   | 0.772739     | 0.574025  | hypothetical protein                     |
| XP_009692542.1 | 0.068361    | 0.474452   | 0.144084     | 0.0723469   | 0.431078   | 0.167828     | 0.155956  | uncharacterized protein                  |
| XP_009692543.1 | 0.0223139   | 0.342491   | 0.0651517    | 0.0253914   | 0.256594   | 0.0989555    | 0.082054  | protein phosphatase regulator subunit    |
| XP_009692544.1 | 0.00287029  | 0.586836   | 0.00489114   | 0.000372321 | 0.372321   | 0.001        | 0.002946  | G protein beta subunit-like polypeptide  |
| XP_009692545.1 | 0.125132    | 0.58725    | 0.213081     | 0.121271    | 0.489705   | 0.24764      | 0.23036   | uncharacterized protein                  |
| XP_009692546.1 | 0.0460658   | 0.375247   | 0.122762     | 0.0433518   | 0.408653   | 0.106085     | 0.114423  | conserved hypothetical protein           |
| XP_009692547.1 | 0.0309638   | 0.122714   | 0.252325     | 0.0886891   | 0.256924   | 0.345195     | 0.29876   | uncharacterized protein                  |
| XP_009692548.1 | 0.0406871   | 0.30476    | 0.133505     | 0.0597237   | 0.423402   | 0.141057     | 0.137281  | uncharacterized protein                  |
| XP_009692549.1 | 0.026798    | 0.34435    | 0.077822     |             |            |              | 0.077822  | uncharacterized protein                  |
| XP_009692550.1 | 0.0405097   | 0.359601   | 0.112652     | 0.0300456   | 0.309798   | 0.0969846    | 0.104818  | uncharacterized protein                  |



| protein_id     | Chitose_ka  | Chitose_ks | Chitose_kaks | Buffeli_ka  | Buffeli_ks | Buffeli_kaks | mean_kaks | function                                 |
|----------------|-------------|------------|--------------|-------------|------------|--------------|-----------|------------------------------------------|
| XP_009692551.1 | 0.0519988   | 0.490085   | 0.106102     | 0.0458349   | 0.423345   | 0.108268     | 0.107185  | conserved hypothetical protein           |
| XP_009692552.1 | 0.00296774  | 0.607784   | 0.00488289   | 0.00318603  | 0.517238   | 0.0061597    | 0.005521  | 60S ribosomal protein L12                |
| XP_009692553.1 | 0.0722302   | 0.459276   | 0.15727      | 0.0809125   | 0.339581   | 0.238272     | 0.197771  | uncharacterized protein                  |
| XP_009692554.1 | 0.055931    | 1.14915    | 0.0486714    | 0.0714029   | 1.64099    | 0.0435122    | 0.046092  | uncharacterized protein                  |
| XP_009692555.1 | 0.0414617   | 0.489159   | 0.0847611    | 0.0316576   | 0.565974   | 0.0559347    | 0.070348  | tRNA-pseudouridine synthase I            |
| XP_009692556.1 | 0.000169083 | 0.169083   | 0.001        | 0.000077432 | 0.077432   | 0.001        | 0.001     | 40S ribosomal protein S11                |
| XP_009692557.1 | 0.0315813   | 0.551498   | 0.0572646    | 0.0347923   | 0.534398   | 0.0651057    | 0.061185  | conserved hypothetical protein           |
| XP_009692558.1 | 2.01858E-05 | 0.0201858  | 0.001        | NA          | NA         | NA           | NA        | BoIA-like protein                        |
| XP_009692559.1 | 0.0211246   | 0.436014   | 0.0484493    | 0.020275    | 0.520312   | 0.0389671    | 0.043708  | conserved hypothetical protein           |
| XP_009692560.1 | 0.0222969   | 0.416376   | 0.0535499    | 0.0275762   | 0.381845   | 0.0722184    | 0.062884  | conserved hypothetical protein           |
| XP_009692561.1 | 0.0446375   | 0.321679   | 0.138764     | 0.0347676   | 0.320389   | 0.108517     | 0.123641  | conserved hypothetical protein           |
| XP_009692562.1 | 0.0538811   | 0.606581   | 0.0888276    | 0.0609556   | 0.61088    | 0.0997833    | 0.094305  | conserved hypothetical protein           |
| XP_009692564.1 | 0.0215909   | 0.654526   | 0.0329871    | 0.0175472   | 0.659848   | 0.0265928    | 0.02979   | eukaryotic translation initiation factor |
| XP_009692565.1 | 0.0210499   | 0.438083   | 0.0480499    | 0.0226835   | 0.410549   | 0.0552516    | 0.051651  | prenyltransferase                        |
| XP_009692566.1 | 0.00658996  | 0.499369   | 0.0131966    | 0.000465717 | 0.465717   | 0.001        | 0.007098  | 40S ribosomal protein S24                |
| XP_009692567.1 | 0.324489    | 0.493106   | 0.658052     | 0.261152    | 0.384422   | 0.679337     | 0.668694  | hypothetical protein                     |
| XP_009692568.1 | 0.0185855   | 0.831428   | 0.0223537    | 0.00641427  | 0.5742     | 0.0111708    | 0.016762  | DEAD-box family helicase                 |
| XP_009692569.1 | 0.0355171   | 0.759443   | 0.0467673    | 0.0306064   | 0.77916    | 0.0392812    | 0.043024  | uncharacterized protein                  |
| XP_009692570.1 | 0.0281731   | 1.08496    | 0.025967     | 0.0295807   | 1.00616    | 0.0293996    | 0.027683  | RNA-binding protein Puf1                 |
| XP_009692571.1 | 0.216825    | 0.225599   | 0.961107     | 0.217997    | 0.123085   | 1.77111      | 1.366108  | hypothetical protein                     |
| XP_009692572.1 | 0.0370497   | 0.299567   | 0.123678     | 0.0467875   | 0.352253   | 0.132824     | 0.128251  | uncharacterized protein                  |
| XP_009692573.1 | 0.0583787   | 0.181919   | 0.320905     | 0.105858    | 0.105664   | 1.00184      | 0.661373  | hypothetical protein                     |
| XP_009692574.1 | 0.0869953   | 0.692299   | 0.125661     | 0.0698052   | 0.598149   | 0.116702     | 0.121181  | conserved hypothetical protein           |
| XP_009692575.1 | 0.0878039   | 0.200892   | 0.437071     | 0.0944698   | 0.144433   | 0.654073     | 0.545572  | hypothetical protein                     |
| XP_009692576.1 | 0.03834     | 1.07126    | 0.0357896    | 0.0302793   | 1.01187    | 0.029924     | 0.032857  | uncharacterized protein                  |
| XP_009692577.1 | 0.024363    | 0.429707   | 0.0566967    | 0.0299929   | 0.584281   | 0.0513329    | 0.054015  | uncharacterized protein                  |
| XP_009692578.1 | 0.0492439   | 0.733699   | 0.0671173    | 0.0500585   | 0.674626   | 0.0742018    | 0.07066   | conserved hypothetical protein           |
| XP_009692579.1 | 0.0592742   | 0.76049    | 0.0779421    | 0.0378473   | 0.926686   | 0.0408415    | 0.059392  | uncharacterized protein                  |
| XP_009692580.1 | 0.0528615   | 0.41867    | 0.12626      | 0.0510248   | 0.432812   | 0.117891     | 0.122076  | uncharacterized protein                  |
| XP_009692581.1 | 0.0190434   | 0.605031   | 0.031475     | 0.0172625   | 0.561867   | 0.0307234    | 0.031099  | vesicle transport protein                |
| XP_009692582.1 | 0.0368988   | 0.552762   | 0.0667534    | 0.0397551   | 0.442196   | 0.0899038    | 0.078329  | uncharacterized protein                  |
| XP_009692583.1 | 0.0177992   | 0.453543   | 0.0392449    | 0.0171099   | 0.193908   | 0.0882376    | 0.063741  | uncharacterized protein                  |
| XP_009692584.1 | 0.0477169   | 0.696809   | 0.0684791    | 0.046537    | 0.711689   | 0.0653895    | 0.066934  | conserved hypothetical protein           |
| XP_009692585.1 | 0.0630037   | 0.474243   | 0.132851     | 0.0666334   | 0.441792   | 0.150825     | 0.141838  | uncharacterized protein                  |
| XP_009692586.1 | 0.0528098   | 0.396799   | 0.133089     | 0.0590701   | 0.413764   | 0.142763     | 0.137926  | conserved hypothetical protein           |
| XP_009692587.1 | 0.0327685   | 0.480392   | 0.068212     | 0.0487876   | 0.405329   | 0.120365     | 0.094288  | peptide chain release factor             |
| XP_009692588.1 | 0.0382621   | 0.577031   | 0.0663086    | 0.0565346   | 0.609408   | 0.0927696    | 0.079539  | peptide chain release factor             |
| XP_009692589.1 | 0.0881788   | 0.678789   | 0.129906     | 0.0867065   | 0.520135   | 0.1667       | 0.148303  | uncharacterized protein                  |
| XP_009692590.1 | 0.111815    | 0.872298   | 0.128184     | 0.12422     | 0.41442    | 0.299745     | 0.213965  | hypothetical protein                     |
| XP_009692591.1 | 0.090275    | 0.115867   | 0.090275     | 0.779124    |            |              | 0.779124  | hypothetical protein                     |
| XP_009692592.1 | 0.0208625   | 0.333715   | 0.0625158    | 0.0292244   | 0.407991   | 0.0716299    | 0.067073  | uncharacterized protein                  |
| XP_009692593.1 | 0.00581699  | 1.50263    | 0.0038712    | 0.0054652   | 0.480691   | 0.0113695    | 0.00762   | 60S ribosomal protein L36                |
| XP_009692594.1 | 0.0620914   | 0.54202    | 0.114556     | 0.0608075   | 0.643894   | 0.0944372    | 0.104497  | conserved hypothetical protein           |
| XP_009692595.1 | 0.0243406   | 0.349883   | 0.069568     | 0.0140241   | 0.350143   | 0.0400526    | 0.05481   | 26S proteasome regulatory subunit        |
| XP_009692596.1 | 0.0169139   | 0.437979   | 0.0386181    | 0.0123262   | 0.333305   | 0.0369818    | 0.0378    | uncharacterized protein                  |
| XP_009692597.1 | 0.0774568   | 0.254437   | 0.304424     | 0.0978638   | 0.322066   | 0.303862     | 0.304143  | conserved hypothetical protein           |
| XP_009692598.1 | 0.0374276   | 0.621113   | 0.0602589    | 0.0205352   | 0.505377   | 0.0406335    | 0.050446  | uncharacterized protein                  |
| XP_009692599.1 | 0.0940889   | 0.379144   | 0.248161     | 0.0953369   | 0.331313   | 0.287755     | 0.267958  | conserved hypothetical protein           |
| XP_009692600.1 | 0.0583059   | 0.451899   | 0.129024     | 0.0527409   | 0.491997   | 0.107197     | 0.118111  | uncharacterized protein                  |
| XP_009692601.1 | 0.00694215  | 0.607506   | 0.0114273    | 0.00571336  | 0.5511     | 0.0103672    | 0.010897  | DNA repair protein Rad51                 |
| XP_009692602.1 | 0.038611    | 0.592116   | 0.0652085    | 0.035157    | 0.517295   | 0.0679631    | 0.066586  | DNA damage response protein              |
| XP_009692603.1 | 0.118162    | 0.0790895  | 1.49403      |             |            |              | 1.49403   | hypothetical protein                     |
| XP_009692604.1 | 0.0288452   | 0.691571   | 0.0417097    | 0.0240893   | 0.73382    | 0.0328273    | 0.037268  | uncharacterized protein                  |

| protein_id     | Chitose_ka | Chitose_ks | Chitose_kaks | Buffeli_ka | Buffeli_ks | Buffeli_kaks | mean_kaks | function                                                |
|----------------|------------|------------|--------------|------------|------------|--------------|-----------|---------------------------------------------------------|
| XP_009692605.1 | 0.0565271  | 0.146009   | 0.387147     |            |            |              | 0.387147  | hypothetical protein                                    |
| XP_009692606.1 | 0.032497   | 0.107365   | 0.302677     |            |            |              | 0.302677  | hypothetical protein                                    |
| XP_009692607.1 | 0.231663   | 0.108403   | 2.13706      |            |            |              | 2.13706   | hypothetical protein                                    |
| XP_009692608.1 | 0.056291   | 0.658916   | 0.0854298    | 0.0470911  | 0.637347   | 0.0738862    | 0.079658  | uncharacterized protein                                 |
| XP_009692609.1 | 0.0828418  | 0.424968   | 0.194937     | 0.0672699  | 0.36372    | 0.18495      | 0.189943  | conserved hypothetical protein                          |
| XP_009692610.1 | 0.0141428  | 0.614749   | 0.0230058    | 0.0181768  | 1.10435    | 0.0164593    | 0.019733  | protein mago nashi homolog                              |
| XP_009692611.1 | 0.0706374  | 0.533104   | 0.132502     | 0.0666467  | 0.523904   | 0.127212     | 0.129857  | uncharacterized protein                                 |
| XP_009692612.1 | 0.0800652  | 0.481073   | 0.16643      | 0.0710894  | 0.565014   | 0.125819     | 0.146124  | lipid-binding/transfer protein                          |
| XP_009692613.1 | 0.109643   | 0.311464   | 0.352024     | 0.0866752  | 0.344542   | 0.251566     | 0.301795  | conserved hypothetical protein                          |
| XP_009692614.1 | 0.0655543  | 0.366879   | 0.178681     | 0.0795983  | 0.496458   | 0.160332     | 0.169507  | uncharacterized protein                                 |
| XP_009692615.1 | 0.0201136  | 0.754397   | 0.0266618    | 0.0218973  | 0.686386   | 0.0319022    | 0.029282  | acetyl-coenzyme A synthetase                            |
| XP_009692616.1 | 0.0321907  | 0.501343   | 0.0642089    | 0.0344107  | 0.488026   | 0.07051      | 0.067359  | importin beta/transportin                               |
| XP_009692617.1 | 0.030701   | 0.394455   | 0.0778315    |            |            |              | 0.0778315 | thioredoxin                                             |
| XP_009692618.1 | 0.114604   | 0.634774   | 0.180543     | 0.121486   | 0.538044   | 0.225793     | 0.203168  | uncharacterized protein                                 |
| XP_009692619.1 | 0.0448638  | 0.505884   | 0.088684     | 0.0425616  | 0.523011   | 0.0813779    | 0.085031  | conserved hypothetical protein                          |
| XP_009692620.1 | 0.112798   | 0.569936   | 0.198113     | 0.119928   | 0.566895   | 0.211552     | 0.204833  | uncharacterized protein                                 |
| XP_009692621.1 | 0.072479   | 0.854904   | 0.0847803    | 0.0682666  | 1.02085    | 0.0668725    | 0.075826  | gamma adaptin                                           |
| XP_009692622.1 | 0.0468715  | 1.00248    | 0.0467556    | 0.0439048  | 0.973318   | 0.0451084    | 0.045932  | uncharacterized protein                                 |
| XP_009692623.1 | 0.0892904  | 0.478631   | 0.186554     | 0.0850156  | 0.545013   | 0.155988     | 0.171271  | conserved hypothetical protein                          |
| XP_009692624.1 | 0.0372748  | 0.595343   | 0.0626108    | 0.0255923  | 0.402309   | 0.0636135    | 0.063112  | uncharacterized protein                                 |
| XP_009692625.1 | 0.0381203  | 0.523771   | 0.0727805    | 0.0388051  | 0.39236    | 0.0989017    | 0.085841  | uncharacterized protein                                 |
| XP_009692626.1 | 0.0644503  | 0.406286   | 0.158633     | 0.0650549  | 0.374844   | 0.173552     | 0.166093  | conserved hypothetical protein                          |
| XP_009692627.1 | 0.0835635  | 0.591889   | 0.141181     | 0.0952955  | 0.474944   | 0.200646     | 0.170913  | conserved hypothetical protein                          |
| XP_009692628.1 | 0.0448763  | 0.559936   | 0.0801455    | 0.0343773  | 0.528339   | 0.0650668    | 0.072606  | conserved hypothetical protein                          |
| XP_009692629.1 | 0.0375097  | 0.482104   | 0.077804     | 0.0299429  | 0.450006   | 0.066539     | 0.072171  | uncharacterized protein                                 |
| XP_009692630.1 | 0.04277    | 0.516561   | 0.0827977    | 0.0287648  | 0.545345   | 0.0527461    | 0.067772  | uncharacterized protein                                 |
| XP_009692631.1 | 0.0908017  | 0.349611   | 0.259722     | 0.0960095  | 0.559009   | 0.17175      | 0.215736  | uncharacterized protein                                 |
| XP_009692632.1 | 0.141623   | 0.5291     | 0.267667     | 0.160626   | 0.531731   | 0.302082     | 0.284875  | conserved hypothetical protein                          |
| XP_009692633.1 | 0.254127   | 0.336333   | 0.755582     | 0.206793   | 0.410353   | 0.50394      | 0.629761  | conserved hypothetical protein                          |
| XP_009692634.1 | 0.0700768  | 0.537888   | 0.130281     | 0.0408508  | 0.408935   | 0.0998956    | 0.115088  | uncharacterized protein                                 |
| XP_009692635.1 | 0.0811574  | 0.470811   | 0.172378     | 0.0708452  | 0.380617   | 0.186133     | 0.179256  | uncharacterized protein                                 |
| XP_009692636.1 | 0.0632431  | 0.396538   | 0.159488     |            |            |              | 0.159488  | uncharacterized protein                                 |
| XP_009692637.1 | 0.0854808  | 0.584564   | 0.14623      | 0.0536429  | 0.357666   | 0.14998      | 0.148105  | conserved hypothetical protein                          |
| XP_009692638.1 | 0.156237   | 0.52951    | 0.29506      | 0.141613   | 0.40517    | 0.349514     | 0.322287  | conserved hypothetical protein                          |
| XP_009692639.1 | 0.0540372  | 0.46682    | 0.115756     | 0.0456521  | 0.300611   | 0.151865     | 0.13381   | uncharacterized protein                                 |
| XP_009692640.1 | 0.0689145  | 0.462487   | 0.149009     | 0.0359042  | 0.384969   | 0.0932652    | 0.121137  | nucleosome/chromatin assembly factor                    |
| XP_009692642.1 | 0.0412916  | 0.53489    | 0.0771964    | 0.0254187  | 0.39569    | 0.0642389    | 0.070718  | uncharacterized protein                                 |
| XP_009692644.1 | 0.0633545  | 0.40031    | 0.158264     | 0.0564341  | 0.412771   | 0.13672      | 0.147492  | filament assembling protein                             |
| XP_009692647.1 | 0.0318997  | 0.572638   | 0.0557066    | 0.0263627  | 0.563277   | 0.0468023    | 0.051254  | CTP-phosphoethanolamine cytidyllyltransferase           |
| XP_009692648.1 | 0.0306189  | 0.512624   | 0.0597297    | 0.0135225  | 0.234873   | 0.0575735    | 0.058652  | conserved hypothetical protein                          |
| XP_009692649.1 | 0.0851237  | 0.606652   | 0.140317     | 0.0860239  | 0.553043   | 0.155547     | 0.147932  | conserved hypothetical protein                          |
| XP_009692650.1 | 0.0431908  | 0.316788   | 0.13634      | 0.0302502  | 0.274035   | 0.110388     | 0.123364  | Plasmodium falciparum CPW-WPC repeat containing protein |
| XP_009692651.1 | 0.0207497  | 1.08323    | 0.0191554    | 0.0175094  | 0.994942   | 0.0175984    | 0.018377  | splicing factor 3b subunit                              |
| XP_009692652.1 | 0.0281892  | 0.404351   | 0.0697146    | 0.0550009  | 0.316843   | 0.17359      | 0.121652  | hypothetical protein                                    |
| XP_009692653.1 | 0.0338903  | 0.481399   | 0.0703996    | 0.0119536  | 0.395556   | 0.0302198    | 0.05031   | Ran binding protein 1                                   |
| XP_009692654.1 | 0.0380725  | 0.52414    | 0.0726381    | 0.0376736  | 0.3904     | 0.0965       | 0.084569  | 50S ribosomal protein L7Ae                              |
| XP_009692656.1 | 0.0526563  | 0.957112   | 0.0550159    | 0.049515   | 1.1624     | 0.0425972    | 0.048807  | conserved hypothetical protein                          |
| XP_009692657.1 | 0.00955485 | 0.576157   | 0.0165837    | 0.00687569 | 0.599793   | 0.0114634    | 0.014024  | molecular chaperone ClpB                                |
| XP_009692658.1 | 0.125955   | 0.708932   | 0.177669     | 0.199878   | 0.777253   | 0.257159     | 0.217414  | uncharacterized protein                                 |
| XP_009692659.1 |            |            |              | 0.202151   | 0.244124   | 0.828066     | 0.828066  | hypothetical protein                                    |
| XP_009692660.1 | 0.0838125  | 0.664191   | 0.126187     | 0.0904266  | 0.682536   | 0.132486     | 0.129336  | conserved hypothetical protein                          |
| XP_009692661.1 | 0.111356   | 0.512611   | 0.217233     | 0.055836   | 0.378347   | 0.147579     | 0.182406  | conserved hypothetical protein                          |
| XP_009692662.1 | 0.0178383  | 0.375533   | 0.0475014    | 0.00523854 | 0.359291   | 0.0145802    | 0.031041  | uncharacterized protein                                 |

| protein_id     | Chitose_ka  | Chitose_ks | Chitose_kaks | Buffeli_ka  | Buffeli_ks | Buffeli_kaks | mean_kaks | function                                             |
|----------------|-------------|------------|--------------|-------------|------------|--------------|-----------|------------------------------------------------------|
| XP_009692663.1 | 0.0379665   | 0.454379   | 0.0835568    | 0.0366662   | 0.541296   | 0.0677377    | 0.075647  | small heat-shock protein                             |
| XP_009692664.1 | 0.030975    | 0.479667   | 0.064576     | 0.00877651  | 0.422721   | 0.0207619    | 0.042669  | ATP-dependent Clp protease proteolytic subunit       |
| XP_009692665.1 | 0.0621684   | 0.365995   | 0.169861     | 0.0470344   | 0.337046   | 0.139549     | 0.154705  | hypothetical protein                                 |
| XP_009692666.1 | 0.0358256   | 0.377671   | 0.0948592    | 0.033184    | 0.270211   | 0.122807     | 0.108833  | uncharacterized protein                              |
| XP_009692667.1 | 0.0255359   | 0.928133   | 0.0275132    | 0.0232641   | 0.890624   | 0.0261211    | 0.026817  | predicted protein                                    |
| XP_009692668.1 | 0.0192387   | 0.722342   | 0.0266338    | 0.0177025   | 0.718057   | 0.0246533    | 0.025644  | uncharacterized protein                              |
| XP_009692669.1 | 0.173836    | 0.340004   | 0.511276     | 0.174919    | 0.265366   | 0.659162     | 0.585219  | hypothetical protein                                 |
| XP_009692670.1 | 0.016792    | 0.334956   | 0.0501319    | 0.0221954   | 0.363654   | 0.0610345    | 0.055583  | uncharacterized protein                              |
| XP_009692671.1 | 0.000162005 | 0.162005   | 0.001        | 5.43242E-05 | 0.0543242  | 0.001        | 0.001     | 40S ribosomal protein S20                            |
| XP_009692672.1 | 0.0061847   | 0.360903   | 0.0171367    | 1.03016E-05 | 0.0103016  | 0.001        | 0.009068  | GNAT-family N-acetyltransferase                      |
| XP_009692673.1 | NA          | NA         | NA           |             |            |              | NA        | conserved hypothetical protein                       |
| XP_009692674.1 | 0.0961558   | 0.421081   | 0.228355     | 0.0804433   | 0.512369   | 0.157003     | 0.192679  | uncharacterized protein                              |
| XP_009692675.1 | 0.0568563   | 0.37345    | 0.152246     | 0.0428657   | 0.459864   | 0.0932138    | 0.12273   | uncharacterized protein                              |
| XP_009692676.1 | 0.273431    | 0.343625   | 0.795725     | 0.194931    | 0.297781   | 0.654612     | 0.725168  | hypothetical protein                                 |
| XP_009692677.1 | 0.100706    | 0.60113    | 0.167527     | 0.091331    | 0.412967   | 0.221158     | 0.194343  | conserved hypothetical protein                       |
| XP_009692678.1 | 0.0612345   | 0.286575   | 0.213677     | 0.0546191   | 0.250522   | 0.218021     | 0.215849  | conserved hypothetical protein                       |
| XP_009692679.1 | 0.0646353   | 0.49223    | 0.131311     | 0.0664432   | 0.464144   | 0.143152     | 0.137232  | conserved hypothetical protein                       |
| XP_009692681.1 | 0.108342    | 0.561682   | 0.192888     | 0.0948784   | 0.477419   | 0.198732     | 0.19581   | conserved hypothetical protein                       |
| XP_009692682.1 | 0.123011    | 0.410651   | 0.299551     | 0.0965172   | 0.416748   | 0.231596     | 0.265574  | hypothetical protein                                 |
| XP_009692683.1 | 0.0219743   | 0.432526   | 0.0508046    | 0.0293837   | 0.418485   | 0.0702145    | 0.06051   | 26S proteasome ATPase subunit                        |
| XP_009692684.1 | 0.0182948   | 0.449681   | 0.0406839    | 0.0153717   | 0.400991   | 0.0383343    | 0.039509  | U5 snRNP-specific subunit                            |
| XP_009692685.1 | 0.0668594   | 0.277993   | 0.240508     |             |            |              | 0.240508  | conserved hypothetical protein                       |
| XP_009692687.1 | 0.105517    | 0.472776   | 0.223186     | 0.0922855   | 0.615411   | 0.149958     | 0.186572  | hypothetical protein                                 |
| XP_009692688.1 | 0.0655155   | 0.602641   | 0.108714     | 0.0597875   | 0.545155   | 0.109671     | 0.109192  | uncharacterized protein                              |
| XP_009692690.1 | 0.101674    | 1.17814    | 0.0863       | 0.0900221   | 1.05097    | 0.0856559    | 0.085978  | conserved hypothetical protein                       |
| XP_009692691.1 | 0.169201    | 0.337238   | 0.501726     | 0.0916716   | 0.540091   | 0.169733     | 0.33573   | hypothetical protein                                 |
| XP_009692692.1 | 0.182783    | 0.289984   | 0.63032      | 0.0831439   | 0.143653   | 0.578784     | 0.604552  | hypothetical protein                                 |
| XP_009692693.1 | 0.116359    | 0.518427   | 0.224447     | 0.0840271   | 0.514263   | 0.163393     | 0.19392   | conserved hypothetical protein                       |
| XP_009692694.1 | 0.106604    | 0.502452   | 0.212167     | 0.0955628   | 0.428207   | 0.223169     | 0.217668  | hypothetical protein                                 |
| XP_009692695.1 | 0.00960098  | 0.268785   | 0.0357199    | 0.0376894   | 0.48117    | 0.0783285    | 0.057024  | endosome sorting protein                             |
| XP_009692696.1 | 8.22433E-05 | 0.0822433  | 0.001        | 6.71178E-05 | 0.0671178  | 0.001        | 0.001     | translation initiation factor                        |
| XP_009692697.1 | 0.0499543   | 0.442364   | 0.112926     | 0.0298722   | 0.266988   | 0.111886     | 0.112406  | glucose-inhibited division protein a-like protein    |
| XP_009692698.1 | 0.0602753   | 0.598862   | 0.10065      | 0.0587032   | 0.599505   | 0.0979193    | 0.099285  | serine/threonine kinase                              |
| XP_009692699.1 | 0.0175362   | 0.420559   | 0.0416973    |             |            |              | 0.0416973 | uncharacterized protein                              |
| XP_009692700.1 | 0.0611582   | 0.514075   | 0.118967     | 0.0594469   | 0.562123   | 0.105754     | 0.112361  | Pumilio RNA-binding region repeat containing protein |
| XP_009692701.1 | 0.0290539   | 0.1103     | 0.263408     |             |            |              | 0.263408  | uncharacterized protein                              |
| XP_009692702.1 | 0.0304216   | 0.237275   | 0.128212     | 0.0298016   | 0.207435   | 0.143667     | 0.135939  | uncharacterized protein                              |
| XP_009692703.1 | 0.040254    | 0.185954   | 0.216472     | 0.0482276   | 0.386338   | 0.124833     | 0.170652  | leucine carboxyl methyltransferase                   |
| XP_009692704.1 | 0.101678    | 0.567777   | 0.179081     | 0.0335022   | 0.259966   | 0.128871     | 0.153976  | uncharacterized protein                              |
| XP_009692705.1 | 0.076889    | 0.375361   | 0.20484      | 0.091513    | 0.39719    | 0.230401     | 0.21762   | structure-specific recognition protein 1             |
| XP_009692706.1 | 0.13211     | 0.142223   | 0.928893     |             |            |              | 0.928893  | hypothetical protein                                 |
| XP_009692707.1 | 0.0432012   | 0.487423   | 0.0886319    | 0.0392429   | 0.838566   | 0.0467976    | 0.067715  | structure-specific recognition protein 1             |
| XP_009692708.1 | 0.00616673  | 0.492421   | 0.0125233    | 0.00932091  | 0.390432   | 0.0238733    | 0.018198  | 60S ribosomal L1/L10a protein                        |
| XP_009692710.1 | 0.0732915   | 0.34348    | 0.213379     | 0.127139    | 0.58688    | 0.216635     | 0.215007  | conserved hypothetical protein                       |
| XP_009692711.1 | 0.054355    | 0.674691   | 0.0805629    | 0.053673    | 0.587145   | 0.0914136    | 0.085988  | uncharacterized protein                              |
| XP_009692712.1 | 0.0770488   | 0.466936   | 0.165009     | 0.122263    | 0.643546   | 0.189983     | 0.177496  | uncharacterized protein                              |
| XP_009692713.1 | 0.0395505   | 0.394265   | 0.100315     | 0.0302445   | 0.138592   | 0.218227     | 0.159271  | uncharacterized protein                              |
| XP_009692714.1 | 0.0605082   | 0.60435    | 0.100121     | 0.0463166   | 0.650195   | 0.0712349    | 0.085678  | uncharacterized protein                              |
| XP_009692715.1 | 0.0710983   | 0.689315   | 0.103143     | 0.079111    | 0.863337   | 0.0916341    | 0.097389  | conserved hypothetical protein                       |
| XP_009692716.1 | 0.130136    | 0.0796641  | 1.63355      |             |            |              | 1.63355   | hypothetical protein                                 |
| XP_009692717.1 | 0.0424637   | 0.457973   | 0.0927209    | 0.0410051   | 0.432095   | 0.0948983    | 0.09381   | uncharacterized protein                              |
| XP_009692719.1 | 0.111207    | 0.409565   | 0.271524     | 0.0826549   | 0.32339    | 0.255589     | 0.263556  | uncharacterized protein                              |
| XP_009692720.1 | 0.021061    | 0.397448   | 0.0529905    | 0.0175063   | 0.399421   | 0.0438293    | 0.04841   | uncharacterized protein                              |

| protein_id     | Chitose_ka  | Chitose_ks | Chitose_kaks | Buffeli_ka  | Buffeli_ks | Buffeli_kaks | mean_kaks | function                        |
|----------------|-------------|------------|--------------|-------------|------------|--------------|-----------|---------------------------------|
| XP_009692721.1 | 0.00422403  | 0.28443    | 0.0148509    | 0.0128817   | 0.403576   | 0.031919     | 0.023385  | uncharacterized protein         |
| XP_009692722.1 | 0.0357578   | 0.295488   | 0.121013     |             |            |              | 0.121013  | uncharacterized protein         |
| XP_009692723.1 | 0.0445344   | 0.506125   | 0.0879909    | 0.0412599   | 0.792076   | 0.0520908    | 0.070041  | signal peptidase                |
| XP_009692725.1 | 0.0326462   | 0.265316   | 0.123046     |             |            |              | 0.123046  | conserved hypothetical protein  |
| XP_009692726.1 | 0.077432    | 0.592067   | 0.130783     | 0.0794042   | 0.569712   | 0.139376     | 0.13508   | uncharacterized protein         |
| XP_009692727.1 | 0.0671603   | 0.783991   | 0.0856646    | 0.0671599   | 0.699909   | 0.0959552    | 0.09081   | uncharacterized protein         |
| XP_009692728.1 | 0.00033422  | 0.33422    | 0.001        | 0.000786185 | 0.786185   | 0.001        | 0.001     | 60S ribosomal protein L32       |
| XP_009692729.1 | 0.110688    | 0.271627   | 0.407501     | 0.0936554   | 0.231905   | 0.403852     | 0.405676  | conserved hypothetical protein  |
| XP_009692730.1 |             |            |              | 0.114113    | 0.289028   | 0.394818     | 0.394818  | uncharacterized protein         |
| XP_009692731.1 | 0.152373    | 0.56086    | 0.271677     |             |            |              | 0.271677  | conserved hypothetical protein  |
| XP_009692736.1 | 0.00305138  | 0.416966   | 0.00731806   | 0.00113117  | 0.531756   | 0.00212723   | 0.004723  | tubulin subunit alpha           |
| XP_009692737.1 | 0.000268011 | 0.268011   | 0.001        |             |            |              | 0.001     | conserved hypothetical protein  |
| XP_009692738.1 | 0.0778773   | 0.454412   | 0.17138      | 0.0568927   | 0.426527   | 0.133386     | 0.152383  | conserved hypothetical protein  |
| XP_009692739.1 | 0.0472766   | 0.561331   | 0.0842223    | 0.0605066   | 0.250838   | 0.241218     | 0.16272   | conserved hypothetical protein  |
| XP_009692740.1 | 0.0289193   | 0.356461   | 0.0811289    | 0.0313108   | 0.362892   | 0.0862815    | 0.083705  | T-complex protein 1 chaperonin  |
| XP_009692741.1 | 0.0932318   | 0.584535   | 0.159497     | 0.0801903   | 0.548294   | 0.146254     | 0.152875  | DEAD-box family helicase        |
| XP_009692742.1 | 0.0410862   | 0.416775   | 0.0985813    |             |            |              | 0.0985813 | uncharacterized protein         |
| XP_009692744.1 | 0.157373    | 0.539449   | 0.29173      |             |            |              | 0.29173   | uncharacterized protein         |
| XP_009692745.1 | 0.159083    | 0.388756   | 0.409211     |             |            |              | 0.409211  | uncharacterized protein         |
| XP_009692749.1 | 0.102516    | 0.784454   | 0.130684     | 0.10429     | 0.633647   | 0.164586     | 0.147635  | conserved hypothetical protein  |
| XP_009692750.1 | 0.118934    | 0.46661    | 0.254889     | 0.0936751   | 0.421331   | 0.222331     | 0.23861   | uncharacterized protein         |
| XP_009692751.1 | 0.0459169   | 0.626412   | 0.0733015    | 0.0446059   | 0.439747   | 0.101435     | 0.087368  | uncharacterized protein         |
| XP_009692753.1 | 0.0660168   | 0.779343   | 0.0847082    | 0.0957197   | 0.716407   | 0.133611     | 0.10916   | conserved hypothetical protein  |
| XP_009692754.1 | 0.085967    | 0.503173   | 0.17085      | 0.0513837   | 0.423817   | 0.12124      | 0.146045  | dimethyladenosine transferase   |
| XP_009692755.1 | 0.116666    | 0.54085    | 0.215709     | 0.121869    | 0.471865   | 0.258271     | 0.23699   | Requim%2C req/dpf2              |
| XP_009692756.1 | 0.000207748 | 0.207748   | 0.001        | 0.000214172 | 0.214172   | 0.001        | 0.001     | histone H2B variant 1           |
| XP_009692757.1 | 0.0366397   | 0.504583   | 0.0726139    | 0.00976191  | 0.0688186  | 0.14185      | 0.107232  | conserved hypothetical protein  |
| XP_009692758.1 | 0.00505785  | 0.475133   | 0.0106451    | 0.000350478 | 0.350478   | 0.001        | 0.005823  | conserved hypothetical protein  |
| XP_009692759.1 | 0.0534316   | 0.419726   | 0.127301     |             |            |              | 0.127301  | conserved hypothetical protein  |
| XP_009692760.1 | 0.14468     | 0.479884   | 0.30149      | 0.121113    | 0.362513   | 0.334092     | 0.317791  | uncharacterized protein         |
| XP_009692763.1 | 0.0328385   | 0.260049   | 0.126278     | 0.073707    | 0.607367   | 0.121355     | 0.123816  | uncharacterized protein         |
| XP_009692764.1 | 0.0214069   | 0.366377   | 0.0584288    | 0.0266479   | 0.324143   | 0.0822101    | 0.070319  | uncharacterized protein         |
| XP_009692766.1 | 0.0183669   | 0.672127   | 0.0273266    | 0.0145334   | 0.744312   | 0.019526     | 0.023426  | uncharacterized protein         |
| XP_009692767.1 | 0.0621659   | 0.396898   | 0.156629     | 0.0491085   | 0.442594   | 0.110956     | 0.133792  | methionine aminopeptidase       |
| XP_009692768.1 | 0.128078    | 0.600797   | 0.213181     | 0.140588    | 0.721366   | 0.194892     | 0.204037  | uncharacterized protein         |
| XP_009692770.1 | 0.119301    | 0.512021   | 0.233        | 0.108466    | 0.618462   | 0.17538      | 0.20419   | hypothetical protein            |
| XP_009692771.1 | 0.0665069   | 0.489028   | 0.135998     | 0.0527376   | 0.406061   | 0.129876     | 0.132937  | uncharacterized protein         |
| XP_009692772.1 | 0.00704334  | 0.585826   | 0.0120229    | 0.00122244  | 0.593567   | 0.00205948   | 0.007041  | chaperonin HSP60                |
| XP_009692773.1 | 0.0787415   | 0.459728   | 0.171279     | 0.0568887   | 0.537825   | 0.105776     | 0.138527  | conserved hypothetical protein  |
| XP_009692774.1 | 0.0450748   | 0.375583   | 0.120013     | 0.0449278   | 0.420499   | 0.106844     | 0.113428  | uncharacterized protein         |
| XP_009692775.1 |             |            |              | 0.103087    | 0.393537   | 0.261951     | 0.261951  | conserved hypothetical protein  |
| XP_009692777.1 | 0.103404    | 0.609123   | 0.169759     | 0.110484    | 0.624024   | 0.17705      | 0.173405  | uncharacterized protein         |
| XP_009692778.1 | 0.0455799   | 0.276414   | 0.164897     | 0.0326099   | 0.231858   | 0.140646     | 0.152772  | superoxide dismutase            |
| XP_009692779.1 | 0.0611927   | 0.355108   | 0.172321     | 0.017296    | 0.0690169  | 0.250605     | 0.211463  | tRNA modification GTPase        |
| XP_009692780.1 | 0.0924613   | 0.710899   | 0.130063     |             |            |              | 0.130063  | conserved hypothetical protein  |
| XP_009692781.1 | 0.0835739   | 1.2616     | 0.0662441    | 0.0555956   | 1.17725    | 0.047225     | 0.056735  | uncharacterized protein         |
| XP_009692784.1 | 0.11343     | 0.523799   | 0.216552     |             |            |              | 0.216552  | conserved hypothetical protein  |
| XP_009692786.1 | 0.31662     | 0.0434908  | 7.28017      | 0.324454    | 0.0468645  | 6.92323      | 7.1017    | 26S protease regulatory subunit |
| XP_009692787.1 | 0.145818    | 0.345084   | 0.422559     |             |            |              | 0.422559  | uncharacterized protein         |
| XP_009692788.1 | 0.135487    | 0.411042   | 0.329617     | 0.121847    | 0.360882   | 0.337636     | 0.333626  | hypothetical protein            |
| XP_009692789.1 | 0.113459    | 0.423361   | 0.267995     | 0.103122    | 0.373816   | 0.275864     | 0.271929  | conserved hypothetical protein  |
| XP_009692792.1 | 0.0591942   | 0.556267   | 0.106413     | 0.0717743   | 0.678068   | 0.105851     | 0.106132  | uncharacterized protein         |
| XP_009692793.1 | 0.0671617   | 0.197721   | 0.33968      |             |            |              | 0.33968   | uncharacterized protein         |

| protein_id     | Chitose_ka  | Chitose_ks | Chitose_kaks | Buffeli_ka  | Buffeli_ks | Buffeli_kaks | mean_kaks | function                         |
|----------------|-------------|------------|--------------|-------------|------------|--------------|-----------|----------------------------------|
| XP_009692794.1 | 0.011051    | 1.21988    | 0.00905909   | 0.0113305   | 1.29918    | 0.00872127   | 0.00889   | splicing factor                  |
| XP_009692797.1 | 0.0734418   | 0.203001   | 0.361781     | 0.0384337   | 0.0674591  | 0.569734     | 0.465757  | hypothetical protein             |
| XP_009692798.1 | 0.00934859  | 0.361057   | 0.0258923    | 0.00911697  | 0.567136   | 0.0160755    | 0.020984  | peroxiredoxin 1                  |
| XP_009692799.1 | 0.184577    | 0.860634   | 0.214466     | 0.204836    | 0.903447   | 0.226727     | 0.220597  | conserved hypothetical protein   |
| XP_009692800.1 | 0.000115721 | 0.115721   | 0.001        | 0.0111572   | 1.0659     | 0.0104674    | 0.005734  | conserved hypothetical protein   |
| XP_009692801.1 | 0.0725136   | 0.40784    | 0.177799     | 0.0672231   | 0.643894   | 0.104401     | 0.1411    | conserved hypothetical protein   |
| XP_009692802.1 | 0.050522    | 0.682535   | 0.0740211    | 0.0408516   | 0.621847   | 0.065694     | 0.069858  | FG-GAP repeat containing protein |
| XP_009692803.1 | 0.0643851   | 0.00129133 | 49.8594      |             |            |              | 49.8594   | hypothetical protein             |
| XP_009692804.1 | 0.00545181  | 0.160801   | 0.033904     |             |            |              | 0.033904  | conserved hypothetical protein   |
| XP_009692805.1 | 0.0364574   | 0.184139   | 0.197988     | 0.0219471   | 0.10698    | 0.20515      | 0.201569  | conserved hypothetical protein   |
| XP_009692806.1 | 0.0716106   | 0.475666   | 0.150548     | 0.0730189   | 0.435366   | 0.167718     | 0.159133  | conserved hypothetical protein   |
| XP_009692807.1 | 0.0367075   | 0.392008   | 0.0936398    |             |            |              | 0.0936398 | cell cycle regulator protein     |
| XP_009692809.1 |             |            |              | 0.0911297   | 0.263344   | 0.346048     | 0.346048  | conserved hypothetical protein   |
| XP_009692810.1 | 0.105495    | 0.628575   | 0.167833     | 0.106263    | 0.723958   | 0.14678      | 0.157307  | uncharacterized protein          |
| XP_009692811.1 | 0.05103     | 0.465504   | 0.109623     | 0.048052    | 0.484405   | 0.099198     | 0.10441   | 50S ribosomal protein L16        |
| XP_009692812.1 | NA          | NA         | NA           | NA          | NA         | NA           | NA        | conserved hypothetical protein   |
| XP_009692813.1 | 0.0372792   | 0.975351   | 0.0382213    | 0.0291231   | 0.582822   | 0.049969     | 0.044095  | phosphatidate cytidyltransferase |
| XP_009692814.1 | 0.0239788   | 0.37174    | 0.0645043    | 0.0176186   | 0.256544   | 0.0686765    | 0.06659   | ferredoxin                       |
| XP_009692815.1 | 0.00296554  | 0.291309   | 0.01018      | 0.000306428 | 0.306428   | 0.001        | 0.00559   | 40S ribosomal protein S15        |
| XP_009692816.1 | 0.07939     | 0.495542   | 0.160208     | NA          | NA         | NA           | 0.160208  | surface protein                  |
| XP_009692817.1 | 0.135565    | 0.259622   | 0.522165     |             |            |              | 0.522165  | conserved hypothetical protein   |
| XP_009692818.1 | 0.0342099   | 0.921075   | 0.0371413    | 0.0176267   | 0.619867   | 0.0284363    | 0.032789  | conserved hypothetical protein   |
| XP_009692819.1 | 0.0879371   | 0.574334   | 0.153111     | 0.0652425   | 0.469417   | 0.138986     | 0.146048  | conserved hypothetical protein   |
| XP_009692820.1 | 0.125929    | 0.500592   | 0.251561     | 0.0978724   | 0.271953   | 0.359887     | 0.305724  | conserved hypothetical protein   |
| XP_009692821.1 | 0.0198102   | 0.69163    | 0.0286428    |             |            |              | 0.0286428 | conserved hypothetical protein   |
| XP_009692826.1 |             |            |              | 0.058085    | 0.296174   | 0.196118     | 0.196118  | uncharacterized protein          |
| XP_012965617.1 | 0.16241     | 0.0226319  | 7.17616      | 0.100293    | 0.0183469  | 5.46648      | 6.32132   | cytochrome c oxidase subunit 1   |
